# Supplementary material for: Synchronous ensembles of hippocampal CA1 pyramidal neurons during novel exploration
Source: eLife. 2025 Oct 13;13:RP96718. doi: 10.7554/eLife.96718 (PMC12517686; doi:10.7554/eLife.96718)
Supplement: Figure 1—source data 1. [file elife-96718-fig1-data1.xlsx]

## Sheet: Figure1D
Lag	SC	SC_rand
-299	1.06901	1.00744
-298	1.08066	0.990055
-297	1.10098	1.04511
-296	1.10037	1.01306
-295	1.00415	0.965422
-294	1.0772	0.967121
-293	1.12806	0.991072
-292	1.0952	0.984929
-291	1.05991	0.979555
-290	1.13319	1.00819
-289	1.04	0.982737
-288	1.0961	0.968539
-287	1.14785	0.994135
-286	1.14569	0.976822
-285	1.17262	0.967425
-284	1.06121	0.965237
-283	1.14157	1.01687
-282	1.07184	0.967886
-281	1.12542	0.922211
-280	1.09846	0.974507
-279	1.13164	1.00914
-278	1.01535	1.00018
-277	1.05596	0.942977
-276	1.1128	0.95805
-275	1.08905	0.944295
-274	1.09735	0.975474
-273	1.08911	1.00103
-272	1.06687	0.968337
-271	1.06545	0.954017
-270	1.14984	0.996858
-269	1.13865	0.966132
-268	1.05529	0.996196
-267	1.09374	0.978159
-266	1.17651	0.938024
-265	1.15087	0.999186
-264	1.11496	0.977434
-263	1.1348	1.0227
-262	1.12556	0.930784
-261	1.14649	1.0343
-260	1.14009	1.02864
-259	1.14561	0.962165
-258	1.18317	1.02903
-257	1.11306	0.955663
-256	1.12081	1.02367
-255	1.13203	0.935196
-254	1.11635	1.04779
-253	1.10369	0.971764
-252	1.07349	1.02124
-251	1.1159	0.894908
-250	1.09451	1.0167
-249	1.10803	0.924376
-248	1.1257	1.01589
-247	1.1372	1.00417
-246	1.13627	0.956141
-245	1.09272	1.02655
-244	1.04131	1.04722
-243	1.10459	1.03474
-242	1.04669	0.996759
-241	1.12821	1.04878
-240	1.05795	1.04073
-239	1.11742	0.977967
-238	1.02142	1.02442
-237	1.11405	1.01823
-236	1.0554	0.955201
-235	0.985603	1.00286
-234	1.05082	1.06051
-233	1.02056	0.974946
-232	1.0431	1.00282
-231	1.03881	1.01084
-230	1.06281	1.01919
-229	1.04772	1.03725
-228	1.05257	1.01277
-227	0.981846	0.971702
-226	1.00452	1.06756
-225	1.00482	0.980143
-224	0.987602	0.995694
-223	0.930118	0.993457
-222	1.03634	1.01547
-221	0.995918	0.967203
-220	1.02384	1.00419
-219	0.947664	1.05067
-218	0.917271	0.95749
-217	0.969424	0.993498
-216	0.98256	1.04673
-215	0.932762	0.94792
-214	0.897979	0.97226
-213	0.962919	1.00027
-212	0.976787	1.005
-211	0.92259	1.0042
-210	0.977983	1.0093
-209	0.967217	0.954068
-208	0.952684	0.926091
-207	0.925468	1.03432
-206	0.984468	0.953523
-205	0.940501	0.946222
-204	0.929949	0.966885
-203	0.993037	1.05305
-202	0.961726	1.00313
-201	0.905255	0.947232
-200	0.978069	0.996859
-199	0.954358	0.995076
-198	0.938394	0.993385
-197	0.932241	1.00495
-196	0.948689	0.980842
-195	0.916271	1.00197
-194	1.0276	0.988823
-193	0.947849	0.988363
-192	0.897978	0.95624
-191	0.972765	0.967944
-190	0.919631	1.01075
-189	0.970808	0.947252
-188	1.03457	0.995986
-187	0.97906	1.00983
-186	0.999467	0.997538
-185	0.994467	1.01156
-184	0.982762	1.07082
-183	0.985278	0.957649
-182	1.00526	0.985795
-181	1.02966	0.997828
-180	0.993603	0.994245
-179	0.983868	0.971918
-178	1.01053	1.03104
-177	1.04227	0.983334
-176	0.98363	0.980821
-175	1.01047	0.978827
-174	0.988434	1.05289
-173	1.0213	0.994049
-172	1.04716	1.02824
-171	1.08167	1.00081
-170	1.03783	1.07589
-169	1.00037	1.0689
-168	1.07354	0.944187
-167	1.08654	0.978816
-166	1.05432	0.949078
-165	1.07159	1.04668
-164	1.05366	1.00472
-163	1.10174	1.00243
-162	1.02332	1.03853
-161	1.14338	1.00283
-160	1.07697	0.971993
-159	1.11074	0.955041
-158	1.09657	1.00105
-157	1.10402	1.08015
-156	1.09685	1.00301
-155	1.10726	1.02662
-154	1.13133	1.00725
-153	1.17376	0.963934
-152	1.12056	0.949358
-151	1.10802	1.01924
-150	1.13805	1.03184
-149	1.15675	1.0431
-148	1.12766	1.0684
-147	1.19044	1.05095
-146	1.20601	0.924029
-145	1.15767	0.982224
-144	1.22553	1.02385
-143	1.26138	0.99416
-142	1.19237	0.958406
-141	1.23708	0.948156
-140	1.2015	0.983786
-139	1.17226	1.03828
-138	1.16661	0.983794
-137	1.20752	0.947421
-136	1.21694	0.974568
-135	1.21126	0.947964
-134	1.23567	0.942589
-133	1.1446	0.998735
-132	1.1553	0.981828
-131	1.20353	1.00243
-130	1.2324	1.03075
-129	1.18091	1.0147
-128	1.22966	1.06513
-127	1.22683	1.00728
-126	1.24444	1.0757
-125	1.17469	0.980419
-124	1.17452	1.01448
-123	1.19404	0.972012
-122	1.16744	0.985797
-121	1.18602	0.963445
-120	1.13215	0.96166
-119	1.17137	1.0003
-118	1.12994	1.01052
-117	1.20092	1.03589
-116	1.1551	0.936355
-115	1.17865	1.01105
-114	1.154	1.05895
-113	1.13911	0.975309
-112	1.08918	0.983605
-111	1.16331	0.968667
-110	1.11014	0.978062
-109	1.14415	0.984579
-108	1.03909	1.02505
-107	1.06795	1.03174
-106	1.07984	1.04306
-105	0.998663	0.970455
-104	1.05241	0.979433
-103	1.01149	1.02952
-102	0.989521	0.985115
-101	1.06839	0.934587
-100	1.00464	0.992862
-99	1.04177	1.01751
-98	1.04059	1.02977
-97	0.926094	1.02337
-96	0.990411	0.930459
-95	0.906926	1.00478
-94	0.926039	1.04279
-93	0.909462	1.02461
-92	0.952464	0.966251
-91	1.00266	0.993993
-90	0.894668	1.01552
-89	0.899025	0.988282
-88	0.946978	1.03316
-87	0.919952	0.968782
-86	0.899947	1.00757
-85	0.865309	1.0442
-84	0.887151	1.06475
-83	0.898208	1.04435
-82	0.850633	1.06026
-81	0.947272	1.03264
-80	0.855909	1.02698
-79	0.899323	0.930265
-78	0.899963	1.01415
-77	0.832485	1.03357
-76	0.90042	0.98489
-75	0.874338	1.05289
-74	0.884915	0.948168
-73	0.880375	0.936042
-72	0.910359	1.05405
-71	0.880654	0.968187
-70	0.884575	1.00891
-69	0.919233	0.990564
-68	0.916842	1.03508
-67	0.883245	1.01559
-66	0.876382	1.0117
-65	0.920479	1.02679
-64	0.865261	0.942847
-63	0.882454	0.982309
-62	0.809157	1.01977
-61	0.949801	0.959409
-60	0.883168	1.03483
-59	0.928168	1.03276
-58	0.939417	1.05747
-57	0.909833	0.97034
-56	0.935275	0.989884
-55	0.920314	1.027
-54	0.955916	1.02857
-53	0.917818	1.03493
-52	0.950808	0.970602
-51	0.998747	0.961229
-50	1.00887	0.946352
-49	1.05426	1.00325
-48	0.94141	0.983078
-47	0.987243	1.01431
-46	1.00222	1.0496
-45	1.0059	0.978772
-44	1.00175	1.05255
-43	0.995836	0.973471
-42	1.02095	1.00953
-41	1.06163	0.983785
-40	1.07913	0.996775
-39	1.08675	0.994733
-38	1.09163	0.98323
-37	1.12543	0.992432
-36	1.15061	0.977631
-35	1.16826	1.00826
-34	1.14486	0.927986
-33	1.1436	0.984034
-32	1.21554	0.962445
-31	1.19878	0.967038
-30	1.18491	1.039
-29	1.18478	0.960769
-28	1.27779	0.996439
-27	1.25913	0.971465
-26	1.27521	0.989804
-25	1.26245	0.96535
-24	1.20802	0.958035
-23	1.30695	0.97896
-22	1.2575	1.00771
-21	1.31596	0.959743
-20	1.35073	0.999327
-19	1.30508	1.04625
-18	1.37332	0.977253
-17	1.39756	0.909202
-16	1.46217	0.983478
-15	1.46126	0.909685
-14	1.50997	0.964796
-13	1.55826	0.963645
-12	1.57032	1.01578
-11	1.57974	0.963403
-10	1.71703	0.976317
-9	1.72884	1.02551
-8	1.88248	0.955685
-7	1.8025	1.0103
-6	2.01346	1.01819
-5	2.0396	0.943319
-4	2.19915	1.06811
-3	2.27562	1.0036
-2	2.41999	0.97741
-1	2.60274	0.981473
0	2.59941	1.00521
1	2.74576	1.01412
2	2.64591	0.965606
3	2.41191	1.00758
4	2.27963	0.989748
5	2.19559	1.00925
6	2.11731	1.0409
7	1.9275	1.08863
8	1.95787	0.969237
9	1.77814	0.894097
10	1.77391	1.03204
11	1.68241	1.06841
12	1.62984	1.00997
13	1.55619	0.971309
14	1.53334	1.00031
15	1.43871	0.975602
16	1.48838	0.970923
17	1.45874	0.946274
18	1.39996	0.970611
19	1.37776	1.02528
20	1.284	1.02931
21	1.24157	1.00102
22	1.27407	0.909704
23	1.19036	0.98919
24	1.22653	0.98502
25	1.20319	0.959286
26	1.15501	0.929747
27	1.20616	1.078
28	1.23057	1.01023
29	1.18341	0.970381
30	1.09926	0.988577
31	1.14077	1.01827
32	1.14006	0.943109
33	1.18057	0.937876
34	1.13816	0.971162
35	1.12708	1.03121
36	1.0911	0.974033
37	1.05506	1.03918
38	1.07904	0.995755
39	1.07301	0.994429
40	1.07175	0.988194
41	1.0422	1.01468
42	1.07385	1.02041
43	1.02183	0.921901
44	0.990859	0.989935
45	0.955147	0.967031
46	0.93374	0.968946
47	0.982915	0.981292
48	0.959406	1.04583
49	0.924228	1.02306
50	0.919166	0.980518
51	0.997883	1.01688
52	0.891177	0.98694
53	0.987061	0.986481
54	0.892074	1.03261
55	0.892993	1.05822
56	0.89025	0.993973
57	0.890798	1.00274
58	0.889559	0.978781
59	0.917147	1.01779
60	0.873084	0.995743
61	0.865545	1.02248
62	0.872143	0.980369
63	0.880089	0.947332
64	0.895091	0.996389
65	0.873221	1.00426
66	0.897761	0.996658
67	0.91208	1.01639
68	0.897152	1.01848
69	0.83916	0.99693
70	0.92438	0.990108
71	0.88059	0.978959
72	0.929328	1.0185
73	0.876295	1.01137
74	0.814281	1.01675
75	0.81632	1.04591
76	0.89466	0.987911
77	0.817319	1.02981
78	0.904708	1.02794
79	0.894044	0.972509
80	0.876781	1.03789
81	0.849497	0.97745
82	0.902474	1.02784
83	0.836006	0.99969
84	0.8991	1.02729
85	0.850364	1.00421
86	0.824812	1.06619
87	0.850285	0.989618
88	0.913241	0.941442
89	0.860255	0.998311
90	0.862866	0.982291
91	0.921888	0.999375
92	0.937169	1.01519
93	0.987874	0.9974
94	0.913199	0.968675
95	0.924948	1.00259
96	0.94528	0.927407
97	0.944544	0.971476
98	0.93664	0.968753
99	0.955586	0.969628
100	0.97804	0.972994
101	1.04233	1.00211
102	0.986324	0.948716
103	1.06028	0.999687
104	1.04325	1.02382
105	1.06099	1.00189
106	1.01538	1.01985
107	1.07111	1.04097
108	1.0854	0.91452
109	1.03516	1.0097
110	1.07626	1.03867
111	1.09296	1.00522
112	1.0813	0.977034
113	1.10279	1.0474
114	1.14222	1.04961
115	1.10888	0.972228
116	1.14266	0.962741
117	1.16841	0.986136
118	1.20705	0.987156
119	1.26494	0.988313
120	1.16444	0.931099
121	1.12622	1.00387
122	1.13139	1.03475
123	1.23465	0.957526
124	1.07816	1.04524
125	1.14697	0.999265
126	1.19099	0.969062
127	1.18186	0.952571
128	1.20762	1.09272
129	1.20948	1.02009
130	1.19336	1.04556
131	1.22135	1.02598
132	1.19858	1.00705
133	1.15837	0.989169
134	1.1638	1.07254
135	1.15217	0.995721
136	1.19891	0.954643
137	1.17051	1.00129
138	1.24693	0.987549
139	1.1821	0.982784
140	1.22157	0.927456
141	1.18866	1.00199
142	1.16465	0.940803
143	1.21868	0.989097
144	1.2067	1.01114
145	1.21468	1.05919
146	1.24129	0.982618
147	1.17558	0.982993
148	1.17369	0.948549
149	1.15378	1.03724
150	1.18249	1.0143
151	1.12445	1.0187
152	1.20287	1.03267
153	1.14373	0.985432
154	1.15802	0.973622
155	1.22861	1.03669
156	1.091	1.03676
157	1.11474	1.00426
158	1.08837	1.09771
159	1.11307	0.996177
160	1.0643	0.994751
161	1.09625	1.02976
162	1.06968	1.02722
163	1.09036	1.0191
164	1.07094	1.00319
165	1.06943	0.980051
166	1.05654	0.971932
167	1.07094	1.06513
168	1.05153	0.95774
169	1.01377	1.03397
170	0.988308	1.0463
171	0.969964	1.04441
172	1.00228	0.973041
173	1.03818	1.11973
174	1.04396	1.01975
175	0.990368	1.01012
176	1.03891	1.05137
177	0.985081	1.04016
178	0.994961	0.942064
179	1.01535	1.04384
180	1.01036	1.02957
181	1.01684	1.02325
182	0.949492	0.935046
183	1.06523	1.01421
184	0.946425	1.02455
185	0.972614	1.02565
186	0.99334	0.953383
187	0.978515	1.02193
188	1.01013	1.0217
189	0.93786	1.03903
190	0.959321	0.984684
191	0.942733	1.0014
192	0.93785	1.01901
193	0.957824	1.02483
194	0.947848	0.967687
195	0.983139	0.999156
196	0.899014	0.988933
197	0.971015	1.06382
198	0.952006	1.03705
199	0.969187	0.975106
200	0.931522	1.02445
201	0.902993	1.02135
202	0.948959	0.941896
203	0.925394	1.01321
204	0.955661	0.99565
205	0.966548	0.960838
206	0.951253	0.933545
207	0.933532	0.977866
208	0.96994	0.989461
209	0.937788	0.94479
210	0.973548	0.957573
211	0.958794	1.04383
212	0.911738	0.9996
213	0.984908	0.96598
214	0.986224	1.01655
215	0.941746	0.969141
216	0.952153	1.01104
217	1.0079	0.989643
218	0.938319	1.06474
219	0.945085	0.988687
220	0.968577	0.998487
221	0.965025	1.00807
222	1.07856	1.00862
223	0.98429	0.975147
224	0.974081	0.966126
225	0.926273	0.987838
226	1.04882	0.979084
227	1.00793	1.05185
228	1.03357	1.08939
229	1.03166	0.9682
230	1.0171	0.988098
231	1.03005	0.99071
232	1.0719	1.00107
233	1.07672	1.02502
234	1.07748	0.99386
235	1.0484	1.01904
236	1.07811	1.06961
237	1.04457	1.00999
238	1.09632	0.991915
239	1.06782	1.01185
240	1.09787	1.05067
241	1.05945	0.966907
242	1.13638	0.979081
243	1.1243	1.00778
244	1.09051	1.00498
245	1.04453	1.0126
246	1.08008	1.00322
247	1.1006	0.962598
248	1.1185	1.01874
249	1.08613	1.01706
250	1.20781	0.969828
251	1.12154	0.963364
252	1.11341	0.98757
253	1.11047	1.00692
254	1.06291	0.940284
255	1.10116	0.948734
256	1.13023	0.978205
257	1.16575	1.04296
258	1.13784	0.964026
259	1.13419	0.987905
260	1.15013	0.991417
261	1.18948	1.04398
262	1.12052	0.979144
263	1.14459	0.986052
264	1.13837	0.997321
265	1.167	0.96567
266	1.18761	0.986118
267	1.17473	1.00432
268	1.12353	0.981135
269	1.05359	1.02302
270	1.12751	0.991506
271	1.1863	1.02747
272	1.07668	0.990316
273	1.07045	0.973856
274	1.11602	0.977854
275	1.15609	0.947494
276	1.07569	0.95237
277	1.11142	1.01386
278	1.11985	0.971397
279	1.04071	0.96786
280	1.1031	0.975533
281	1.08072	0.983712
282	1.18712	0.918828
283	1.04451	0.96871
284	1.11687	0.969225
285	1.05545	0.985383
286	1.13909	0.929743
287	1.05492	1.01327
288	1.12962	1.01913
289	1.11241	0.943436
290	1.09439	0.986446
291	1.06393	0.989185
292	1.13168	1.05821
293	1.08165	1.06263
294	1.1121	1.02499
295	1.07457	0.966035
296	1.06298	0.984269
297	1.05189	0.965518
298	1.12276	0.96076
299	1.09061	1.00861
300	1.66365	1.47226

## Sheet: Figure1E
Edges	Counts
-19.75	0
-17.9	0
-16.05	0
-14.2	0
-12.35	0
-10.5	0
-8.65	1
-6.8	0
-4.95	1
-3.1	4
-1.25	21
0.6	36
2.45	3
4.3	2
6.15	2
8	0
9.85	0
11.7	0
13.55	0
15.4	0
17.25	0
19.1

## Sheet: Figure1F
Edges	Counts
0	2
10	32
20	24
30	10
40	1
50	0
60	0
70	1
80	0
90	1
100

## Sheet: Figure1G
Original	Jitter
0.6	0.122222
0.666667	0.122222
0.533333	0.2
1.68889	0.122222
1.72222	0.116667
0.266667	0.0888889
0.6	0.0777778
0.577778	0.144444
1.56667	0.1
1.17778	0.1

## Sheet: Figure1H
Edges	Counts
0.15	17
0.2	70
0.25	79
0.3	136
0.35	118
0.4	90
0.45	99
0.5	90
0.55	49
0.6	47
0.65	25
0.7	7
0.75	15
0.8	0
0.85	3
0.9	1
0.95
