# Supplementary material for: Synchronous ensembles of hippocampal CA1 pyramidal neurons during novel exploration
Source: eLife. 2025 Oct 13;13:RP96718. doi: 10.7554/eLife.96718 (PMC12517686; doi:10.7554/eLife.96718)
Supplement: Figure 3—source data 1. [file elife-96718-fig3-data1.xlsx]

## Sheet: Figure3B_ripple_power_left
0.0192538	0.010341	0.00286254	0.0200473	0.0226242	0.0209091	0.0173887	0.0225749	0.0206299	0.0196907	0.0115294	0.0154409	0.00642072	0.0267982	0.0195285	0.00435983	0.0146145	0.0106995	0.00371591	0.0409982	0.0125049	0.00943839	0.00862963	0.0179721	0.0172147	0.0107762	0.0363185	0.0137909	0.014897	0.0233617	0.0112559	0.0106347	0.0157052	0.0205695	0.0251238	0.0458764	0.00827978	0.00412884	0.0158196	0.00624966	0.00644072	0.0086256	0.0246954	0.0188672	0.0207768	0.0143094	0.0140593	0.0110096	0.0153097	0.0150365
0.0188554	0.00941512	0.0022756	0.0210234	0.0222265	0.0211877	0.018083	0.02204	0.0200301	0.0193936	0.0118165	0.0150862	0.00607724	0.0267148	0.0194315	0.00475083	0.0150382	0.0106702	0.00439895	0.0413903	0.0126608	0.00908304	0.0091001	0.0174754	0.0171661	0.00999318	0.0364714	0.0140848	0.0144327	0.0233323	0.0114609	0.0106232	0.0155028	0.0200094	0.0259134	0.0466691	0.00842749	0.00382031	0.0159723	0.00601852	0.00648206	0.00905495	0.0246627	0.0182923	0.0206237	0.0135212	0.0137768	0.0105115	0.0151007	0.0152334
0.0184824	0.00845935	0.0021079	0.0219751	0.0218256	0.0214608	0.0187566	0.0215125	0.019425	0.0191219	0.0121157	0.0147248	0.00574255	0.0266233	0.0193105	0.00514632	0.0154582	0.0106572	0.00507982	0.0417397	0.0127977	0.0087274	0.00958906	0.0169755	0.0171292	0.00921732	0.0365853	0.0143729	0.0139707	0.0233024	0.0116686	0.0105987	0.0152927	0.019431	0.0267267	0.0474485	0.00856467	0.00349699	0.0161232	0.00577938	0.00652882	0.00950928	0.0246105	0.0177146	0.0204468	0.0127829	0.0134674	0.00998749	0.0149038	0.0154165
0.0181467	0.0074945	0.00247086	0.0229016	0.0214134	0.0217306	0.0194043	0.0209916	0.0187953	0.018876	0.0124372	0.0143581	0.00542053	0.0265326	0.0191719	0.00554921	0.0158705	0.0106622	0.0057457	0.0420517	0.0129071	0.00837919	0.0100954	0.0164728	0.0171125	0.00845615	0.0366743	0.0146575	0.0135171	0.02325	0.011873	0.0105783	0.0150636	0.0188206	0.0275611	0.0482004	0.00869335	0.00317244	0.0162447	0.00552797	0.00658647	0.00997616	0.024503	0.0171122	0.0202554	0.0121001	0.0131342	0.00944235	0.0147177	0.015572
0.0178517	0.0065248	0.00321377	0.0238071	0.0210021	0.0219876	0.0200278	0.0204729	0.0181504	0.0186625	0.0127764	0.013984	0.00511568	0.026438	0.0190167	0.00595905	0.0162763	0.0106804	0.00639276	0.0423221	0.0130035	0.00803475	0.0106163	0.0159692	0.0171107	0.00772736	0.0367361	0.0149394	0.0130654	0.0231782	0.0120724	0.0105545	0.0148185	0.0181835	0.0284058	0.0489449	0.00881641	0.00284576	0.0163648	0.00527053	0.0066447	0.0104632	0.0243332	0.0164959	0.0200427	0.0114784	0.0127637	0.00887708	0.0145347	0.0157098
0.0176029	0.0055621	0.00413923	0.0246795	0.0205796	0.0222215	0.0206246	0.0199719	0.0175062	0.0184804	0.0131333	0.0136118	0.00482532	0.0263415	0.0188506	0.00636575	0.0166774	0.0107145	0.0070268	0.0425498	0.0130727	0.00770795	0.011145	0.0154524	0.0171324	0.00703752	0.036769	0.0152176	0.0126274	0.0230932	0.0122687	0.0105211	0.0145602	0.0175294	0.029271	0.0496687	0.00892982	0.00251245	0.016472	0.00499539	0.00670906	0.0109564	0.0241604	0.0159006	0.0198216	0.0109206	0.0123668	0.00829663	0.0143585	0.0158217
0.017392	0.00460906	0.00514657	0.0255487	0.0201586	0.0224504	0.021187	0.019483	0.0168607	0.0183324	0.0135133	0.0132411	0.00455977	0.0262479	0.0186554	0.00677531	0.0170677	0.0107593	0.00763945	0.0427381	0.0131004	0.00740658	0.0116738	0.014944	0.0171639	0.0063881	0.0367643	0.0154912	0.0122104	0.0229881	0.0124601	0.0104861	0.0142853	0.0168526	0.0301388	0.0503736	0.00905419	0.0021928	0.0165546	0.00470608	0.00678034	0.0114531	0.0239786	0.0153093	0.0195774	0.010428	0.0119435	0.00771034	0.0141978	0.015918
0.0172334	0.0036923	0.00620575	0.0263982	0.0197431	0.0226735	0.0217228	0.0190144	0.0162109	0.0182196	0.0139102	0.0128672	0.00432504	0.0261493	0.0184506	0.00719109	0.0174531	0.0108199	0.00824054	0.042884	0.0131	0.00713883	0.0122129	0.0144268	0.017206	0.00580751	0.0367122	0.0157632	0.0118157	0.0228791	0.0126566	0.0104424	0.013995	0.0161599	0.031013	0.0510432	0.00915479	0.00188664	0.0166271	0.00440436	0.00685323	0.011951	0.0237673	0.0147247	0.0193228	0.0100131	0.0114857	0.00710631	0.0140523	0.015995
0.0171175	0.00286254	0.00728549	0.0271762	0.019314	0.0228858	0.022237	0.0185701	0.0155539	0.018128	0.0143244	0.012492	0.00412192	0.0260542	0.0182192	0.00761292	0.0178289	0.0108707	0.00881919	0.0429918	0.0130694	0.00690317	0.0127428	0.0139142	0.0172653	0.00534474	0.0366304	0.0160252	0.0114521	0.0227587	0.0128497	0.0103848	0.0136873	0.015444	0.0318959	0.0517108	0.00922201	0.00161426	0.016678	0.00408744	0.00692895	0.0124409	0.0235331	0.0141385	0.0190794	0.00968041	0.0110096	0.00647851	0.0139147	0.0160475
0.0170468	0.0022756	0.00837079	0.0279183	0.0188816	0.0230847	0.0227148	0.0181485	0.0148917	0.0180659	0.0147611	0.0121053	0.0039557	0.0259614	0.017964	0.00803255	0.0181898	0.0109245	0.00937759	0.0430525	0.0130129	0.0067151	0.0132726	0.0134032	0.0173363	0.00501888	0.036518	0.0162827	0.0111258	0.0226158	0.0130366	0.0103341	0.0133687	0.0147052	0.0327882	0.0523676	0.00928426	0.00141041	0.0167119	0.00376141	0.00700864	0.0129319	0.0232746	0.0135559	0.0188156	0.00944178	0.0105115	0.00585533	0.0137971	0.0160746
0.0170185	0.0021079	0.00945589	0.028633	0.0184478	0.0232693	0.0231602	0.0177275	0.0142154	0.0180285	0.0152176	0.0117263	0.00382388	0.0258743	0.0177013	0.00846143	0.0185343	0.0110025	0.00992953	0.0430799	0.0129251	0.00657743	0.0138046	0.0128979	0.0174154	0.00487311	0.0363696	0.0165318	0.0108427	0.0224596	0.0132177	0.0102802	0.0130366	0.0139489	0.0336802	0.052974	0.00934086	0.00131203	0.0167338	0.00341007	0.00709085	0.0134195	0.022992	0.0129873	0.0185248	0.00929121	0.00998749	0.00522887	0.0136974	0.0161104
0.0170386	0.00247086	0.0105452	0.0293199	0.0180163	0.0234398	0.023572	0.0173442	0.0135411	0.0180235	0.0156885	0.0113589	0.003734	0.0257906	0.0174183	0.00889692	0.0188679	0.0110974	0.0104699	0.0430674	0.0128149	0.00650368	0.0143271	0.012384	0.0175048	0.00487659	0.0361895	0.0167876	0.0106065	0.0222829	0.0133999	0.0102214	0.0126905	0.013173	0.034577	0.053548	0.00937991	0.00134371	0.0167346	0.0030542	0.00717314	0.0139019	0.0226853	0.0124339	0.0182165	0.00923751	0.00944235	0.004605	0.013618	0.0161089
0.0171122	0.00321377	0.0116356	0.0299762	0.0175799	0.0235972	0.0239505	0.017053	0.0128662	0.0180393	0.0161774	0.0109814	0.00369653	0.0257104	0.0171258	0.00932491	0.01919	0.0111987	0.0109923	0.0430113	0.012683	0.00649391	0.0148345	0.0118563	0.0176081	0.00502702	0.0359726	0.0170612	0.0104208	0.0220935	0.0135792	0.0101533	0.0123306	0.0123796	0.0354802	0.054089	0.0094044	0.00150698	0.0167251	0.00269632	0.00725147	0.0143638	0.0223625	0.0119067	0.0179021	0.00926244	0.00887708	0.00400054	0.0135627	0.0160406
0.017237	0.00413923	0.012723	0.0306001	0.0171475	0.0237339	0.0242991	0.0167834	0.0121827	0.0180761	0.0166876	0.0106005	0.00370493	0.0256322	0.0168213	0.00975989	0.0194945	0.0113023	0.0114912	0.0429113	0.0125273	0.0065508	0.0153328	0.0113667	0.0177183	0.0053588	0.0357252	0.0173184	0.0102926	0.0218895	0.0137495	0.0100816	0.0119628	0.0115775	0.0363756	0.0546157	0.00941583	0.00177151	0.0167028	0.00233571	0.00733103	0.0148207	0.0220111	0.0114108	0.0175852	0.00936806	0.00829663	0.00342175	0.0135323	0.015971
0.0173994	0.00514657	0.0138114	0.0311871	0.0167096	0.0238535	0.024611	0.0165486	0.0114835	0.0181375	0.0172113	0.0102143	0.00375716	0.025571	0.0164994	0.0101999	0.0197822	0.011412	0.0119637	0.0427807	0.0123434	0.00667837	0.0158175	0.0108876	0.0178386	0.00581642	0.0354517	0.0175617	0.0102246	0.0216735	0.0139226	0.00999796	0.0115867	0.0107554	0.0372689	0.0551161	0.00941889	0.00210013	0.0166775	0.00197176	0.00741095	0.0152656	0.0216344	0.0109549	0.0172585	0.00953213	0.00771034	0.00289772	0.0135255	0.0158881
0.017596	0.00620575	0.0148907	0.0317344	0.0162732	0.0239485	0.0248947	0.0163479	0.010775	0.0182188	0.0177455	0.00981383	0.00384631	0.0255442	0.0161664	0.010642	0.0200538	0.0115296	0.0124089	0.0426117	0.0121399	0.00686189	0.0162829	0.010409	0.0179647	0.00637434	0.0351458	0.0177989	0.0102213	0.0214399	0.0140924	0.00992057	0.0111938	0.00990965	0.0381639	0.0555914	0.0094187	0.00247631	0.0166104	0.00161289	0.00748639	0.0156982	0.021245	0.0105372	0.016924	0.00975758	0.00710631	0.00246819	0.0135427	0.0157935
0.0178267	0.00728549	0.015954	0.032249	0.0158332	0.0240381	0.0251398	0.0161834	0.0100639	0.0183225	0.0182874	0.00942139	0.00397024	0.0254948	0.0158204	0.0110815	0.020309	0.0116429	0.0128234	0.0423985	0.0119127	0.00711758	0.0167335	0.00994023	0.0180946	0.00700197	0.0347976	0.0180328	0.0102909	0.0212073	0.0142584	0.00983889	0.0107881	0.00905513	0.0390603	0.056033	0.00941099	0.00288255	0.0164926	0.00127901	0.0075598	0.0161227	0.0208394	0.0101657	0.0165833	0.0100365	0.00647851	0.00219326	0.0135867	0.0156779
0.0180966	0.00837079	0.0169978	0.0327313	0.0153965	0.0241124	0.0253512	0.0160677	0.00934655	0.0184344	0.0188484	0.00903393	0.00412571	0.0254412	0.0154681	0.0115277	0.0205377	0.0117535	0.0132178	0.0421616	0.0116618	0.00742812	0.0171671	0.0094888	0.0182312	0.00767278	0.0344295	0.0182651	0.010416	0.0209605	0.0144251	0.00974741	0.0103797	0.00818866	0.0399462	0.0564358	0.00939506	0.00330342	0.016382	0.00100058	0.0076255	0.0165327	0.0204179	0.00984802	0.0162337	0.0103471	0.00585533	0.00213313	0.0136451	0.0155428
0.0183903	0.00945589	0.0180298	0.0331791	0.0149695	0.0241888	0.0255366	0.0159944	0.00864031	0.0185606	0.0194196	0.00864891	0.00430217	0.0253976	0.015111	0.0119728	0.0207389	0.011873	0.0135903	0.0419101	0.0113943	0.00779292	0.0175767	0.00903736	0.0183821	0.00837464	0.0340442	0.0184985	0.0106077	0.0207032	0.0145793	0.00966327	0.00996137	0.00731399	0.040823	0.0568143	0.00936526	0.00373143	0.0162578	0.000858676	0.0076873	0.0169369	0.0199778	0.00958373	0.0158868	0.010689	0.00522887	0.00231729	0.0137216	0.0153906
0.0187051	0.0105452	0.019045	0.0335862	0.0145459	0.0241994	0.0256838	0.0159627	0.00793209	0.0186847	0.0200456	0.00826717	0.00449869	0.0253616	0.0147428	0.0124127	0.0209317	0.0119894	0.013939	0.0416179	0.0111008	0.00819542	0.0179688	0.00859916	0.0185346	0.00909728	0.033646	0.0187335	0.0108763	0.0204286	0.0147417	0.00957194	0.00953868	0.00643955	0.0416873	0.0571509	0.00932706	0.00417264	0.0161187	0.000935424	0.00774263	0.0173249	0.0195183	0.00938665	0.0155387	0.0110436	0.004605	0.00270358	0.0138231	0.0152226
0.0190359	0.0116356	0.0200473	0.0339574	0.0141238	0.0241573	0.0258273	0.01597	0.00721912	0.0188281	0.0206793	0.00788203	0.0047099	0.0253333	0.0143739	0.0128582	0.0210968	0.0121046	0.0142679	0.0412435	0.0107955	0.00862963	0.0183444	0.00817656	0.0186813	0.00983831	0.0332273	0.0189671	0.0112037	0.0201234	0.0149063	0.00947773	0.0091196	0.00555483	0.0425414	0.057461	0.00927111	0.00461119	0.0159638	0.00119882	0.00779637	0.0176936	0.0190431	0.00925035	0.0151746	0.0114072	0.00400054	0.00321144	0.0139467	0.0150418
0.019374	0.012723	0.0210234	0.0342923	0.0137025	0.024116	0.025941	0.0160149	0.00650139	0.0189936	0.0212936	0.00750519	0.00493141	0.0253081	0.0140018	0.0132928	0.0212312	0.0122223	0.0145751	0.0408359	0.0104756	0.0091001	0.0187004	0.00776601	0.0188273	0.0105683	0.0327887	0.0191992	0.0115903	0.019816	0.0150621	0.00937393	0.00869531	0.00468179	0.0433836	0.0577394	0.00919915	0.00506229	0.0157941	0.00156669	0.00783503	0.0180388	0.018563	0.00917062	0.0148131	0.0117738	0.00342175	0.00378915	0.0140912	0.0148397
0.019729	0.0138114	0.0219751	0.0345885	0.013285	0.0240716	0.0259986	0.0161011	0.00578796	0.019157	0.0219157	0.00713493	0.00516345	0.0252945	0.0136267	0.0137339	0.0213499	0.0123384	0.0148522	0.0404064	0.0101417	0.00958906	0.0190312	0.00736988	0.0189741	0.0112975	0.0323296	0.019429	0.012027	0.019501	0.0152225	0.00927111	0.00828122	0.00382736	0.0442218	0.0579994	0.00911814	0.00551798	0.0156031	0.00199167	0.00787464	0.0183928	0.0180749	0.00917024	0.0144577	0.0121362	0.00289772	0.00440527	0.0142498	0.0146306
0.0200883	0.0148907	0.0229016	0.0348405	0.0128714	0.0240162	0.026008	0.0162268	0.00507167	0.0193166	0.0225385	0.00677344	0.00539826	0.0252895	0.0132563	0.0141797	0.0214406	0.0124378	0.0151063	0.039946	0.0097908	0.0100954	0.0193393	0.00699808	0.019124	0.0120308	0.0318527	0.0196629	0.0125043	0.0191841	0.0153834	0.00917601	0.00787025	0.00302725	0.0450673	0.0582453	0.0090297	0.00595969	0.0153921	0.00244732	0.00790623	0.0187458	0.0175715	0.00922516	0.0140941	0.0124831	0.00246819	0.00504557	0.014415	0.0144062
0.02045	0.015954	0.0238071	0.0350643	0.0124642	0.0239263	0.0259808	0.0163929	0.0043572	0.019466	0.0231768	0.00642072	0.00563106	0.0252817	0.0128919	0.0146145	0.0214915	0.0125259	0.0153376	0.0394648	0.00943839	0.0106163	0.0196406	0.00664623	0.0192735	0.0127498	0.0313553	0.0199	0.0130228	0.0188491	0.0155405	0.00907678	0.00746248	0.00234842	0.0458764	0.0584095	0.00893121	0.00642524	0.0151687	0.00292631	0.00792424	0.019065	0.0170614	0.00934001	0.0137382	0.0128249	0.00219326	0.0056916	0.0145925	0.0141695
0.0208025	0.0169978	0.0246795	0.0352483	0.0120627	0.0238143	0.0259165	0.0165733	0.00364502	0.0196011	0.0238057	0.00607724	0.00586308	0.0252736	0.012533	0.0150382	0.0215174	0.0126036	0.0155457	0.0389543	0.00908304	0.011145	0.0199213	0.00631683	0.0194183	0.0134604	0.0308535	0.0201374	0.0135745	0.0185045	0.015698	0.00897293	0.00707414	0.00194403	0.0466691	0.0585298	0.00882415	0.0068913	0.0149224	0.00341711	0.00793307	0.0193754	0.01654	0.00949946	0.0133884	0.0131522	0.00213313	0.0063441	0.0147763	0.0139225
0.0211518	0.0180298	0.0255487	0.0354003	0.0116667	0.0236657	0.0258188	0.0167667	0.00293203	0.0197314	0.0244527	0.00574255	0.00609331	0.0252677	0.0121823	0.0154582	0.0215168	0.0126773	0.0157271	0.0384099	0.0087274	0.0116738	0.0201932	0.00601237	0.0195671	0.0141658	0.0303506	0.0203717	0.0141608	0.0181605	0.0158542	0.00886829	0.00669241	0.00199006	0.0474485	0.0586193	0.00870874	0.00734667	0.0146621	0.00391846	0.00792818	0.0196611	0.0160233	0.00971056	0.0130326	0.0134683	0.00231729	0.0070057	0.0149724	0.0136692
0.0214892	0.019045	0.0263982	0.0355152	0.0112748	0.0235057	0.0257	0.0169853	0.00223293	0.019853	0.0250999	0.00542053	0.00632177	0.0252419	0.0118288	0.0158705	0.0214911	0.0127387	0.0158817	0.0378419	0.00837919	0.0122129	0.0204204	0.00572999	0.0197144	0.014848	0.0298438	0.0206095	0.0147676	0.0178048	0.0159966	0.00875802	0.00633459	0.00248033	0.0482004	0.0586676	0.00858213	0.0078014	0.0143876	0.00443276	0.00791681	0.0199385	0.0155014	0.00995085	0.0126769	0.0137574	0.00270358	0.00766255	0.0151692	0.013406
0.021817	0.0200473	0.0271762	0.0355886	0.0108873	0.0233004	0.0255534	0.0172286	0.00155373	0.0199673	0.0257469	0.00511568	0.0065436	0.0252319	0.0114865	0.0162763	0.021442	0.0127949	0.0160104	0.0372373	0.00803475	0.0127428	0.0206107	0.00547702	0.0198531	0.0155151	0.029339	0.0208493	0.0153961	0.0174413	0.0161518	0.00865261	0.00599989	0.00322194	0.0489449	0.0586863	0.00845436	0.00824552	0.0140927	0.0049578	0.00788963	0.0202023	0.0149505	0.0102255	0.0123341	0.0140234	0.00321144	0.00831663	0.0153706	0.0131305
0.0221359	0.0210234	0.0279183	0.0356322	0.0105005	0.0230718	0.0253759	0.0174884	0.000922194	0.0200725	0.0264004	0.00482532	0.00675455	0.0252247	0.0111557	0.0166774	0.0213603	0.0128383	0.0161139	0.0366055	0.00770795	0.0132726	0.0207747	0.0052565	0.0199798	0.0161612	0.0288364	0.0210897	0.0160424	0.0170707	0.0163074	0.00854272	0.00569365	0.00407375	0.0496687	0.0586515	0.00831402	0.00868733	0.0137878	0.00549545	0.00785557	0.0204633	0.0144069	0.0105392	0.0119934	0.0142721	0.00378915	0.00895611	0.0155745	0.0128534
0.0224397	0.0219751	0.028633	0.0356459	0.0101161	0.0228252	0.0251664	0.0177554	0.000543109	0.0201601	0.0270519	0.00455977	0.00695193	0.0252201	0.0108381	0.0170677	0.0212543	0.0128871	0.0161971	0.0359518	0.00740658	0.0138046	0.0209167	0.00505637	0.0201025	0.0167815	0.0283509	0.0213285	0.0167057	0.0166909	0.0164513	0.00843558	0.00543566	0.0049859	0.0503736	0.0585932	0.00818517	0.00912314	0.0134702	0.00603834	0.00780471	0.020718	0.0138672	0.0108617	0.0116636	0.0144851	0.00440527	0.00958614	0.0157793	0.0125749
0.0227156	0.0229016	0.0293199	0.035622	0.00973586	0.0225533	0.0249398	0.0180305	0.000869652	0.0202393	0.0276907	0.00432504	0.00714019	0.0252068	0.0105429	0.0174531	0.0211092	0.0129044	0.0162539	0.0352673	0.00713883	0.0143271	0.0210448	0.00488339	0.0202171	0.0173812	0.0278711	0.0215725	0.017385	0.0163045	0.0165872	0.00833425	0.00522399	0.00593181	0.0510432	0.0584974	0.008009	0.00955066	0.0131298	0.00658935	0.00774536	0.0209608	0.0133327	0.0112047	0.0113359	0.0146609	0.00504557	0.010201	0.0159833	0.0122981
0.0229697	0.0238071	0.0299762	0.0355436	0.00937158	0.0222485	0.0246956	0.0183082	0.00149341	0.0202971	0.0283283	0.00412192	0.00731743	0.0251882	0.0102694	0.0178289	0.0209343	0.0128654	0.016291	0.0345644	0.00690317	0.0148345	0.0211477	0.00474367	0.0203274	0.0179637	0.0274171	0.0218154	0.0180752	0.015906	0.0167225	0.00824464	0.00507114	0.00689105	0.0517108	0.05836	0.00780463	0.00996595	0.0127815	0.00714229	0.00766891	0.0212087	0.0128094	0.0115567	0.0110192	0.0148114	0.0056916	0.0108004	0.0161886	0.0120285
0.0232019	0.0246795	0.0306001	0.0354531	0.00901372	0.0219234	0.0244143	0.0185932	0.00216244	0.0203399	0.0289647	0.0039557	0.00748241	0.0251706	0.0100138	0.0181898	0.0207264	0.0128377	0.0162964	0.0338355	0.0067151	0.0153328	0.0212328	0.00462824	0.0204351	0.0185209	0.0269803	0.0220584	0.0187626	0.0155024	0.0168603	0.00816707	0.00497683	0.00786714	0.0523676	0.0581888	0.0076245	0.0103724	0.0124224	0.00770286	0.0075756	0.0214422	0.012288	0.0119002	0.0107253	0.0149333	0.0063441	0.0114047	0.0163831	0.0117509
0.0234019	0.0255487	0.0311871	0.0353467	0.00865631	0.0215698	0.0240946	0.0188662	0.00284851	0.020365	0.0295873	0.00382388	0.00763601	0.0251408	0.00978413	0.0185343	0.020486	0.0128021	0.0162718	0.0330947	0.00657743	0.0158175	0.0212829	0.00454019	0.0205391	0.0190565	0.0265634	0.0223097	0.0194587	0.0150967	0.0170156	0.00807952	0.00493924	0.00885795	0.052974	0.057973	0.00744027	0.0107695	0.0120548	0.00827133	0.00747256	0.0216791	0.0117747	0.0122424	0.0104419	0.0150194	0.0070057	0.0119896	0.016552	0.011483
0.0235848	0.0263982	0.0317344	0.0352071	0.00830298	0.0211841	0.0237505	0.0191564	0.00353361	0.0203669	0.0302033	0.003734	0.00778148	0.0251096	0.00958299	0.0188679	0.0202225	0.0127486	0.0162281	0.0323224	0.00650368	0.0162829	0.0213117	0.00447079	0.0206395	0.0195704	0.0261621	0.022559	0.0201552	0.0146843	0.0171517	0.00799383	0.00496931	0.00987097	0.053548	0.0577139	0.00725062	0.0111487	0.0116863	0.00885179	0.0073546	0.0219084	0.0112728	0.0125837	0.010167	0.0150801	0.00766255	0.012552	0.0167111	0.0112084
0.0237357	0.0271762	0.032249	0.0350394	0.00795673	0.0207721	0.0233902	0.0194287	0.00420894	0.0203485	0.030806	0.00369653	0.00791025	0.025073	0.00940279	0.01919	0.0199265	0.0126736	0.0161636	0.0315343	0.00649391	0.0167335	0.0213213	0.00442295	0.020734	0.0200292	0.0258013	0.0228124	0.0208497	0.0142678	0.0172617	0.00791035	0.0050761	0.0108614	0.054089	0.0574283	0.00704953	0.0115209	0.0113139	0.00943904	0.00722911	0.0221321	0.0107855	0.0129095	0.0099035	0.0151068	0.00831663	0.0130938	0.0168638	0.0109309
0.0238531	0.0279183	0.0327313	0.0348427	0.00761675	0.0203257	0.0230125	0.0196775	0.00487803	0.0203021	0.0313994	0.00370493	0.00801892	0.0250317	0.00925901	0.0194945	0.0196084	0.0125804	0.0160749	0.0307283	0.0065508	0.0171671	0.0213053	0.00438335	0.0208279	0.0204594	0.0254746	0.0230682	0.0215455	0.013846	0.0173738	0.00783452	0.00523298	0.0118526	0.0546157	0.0571045	0.0068518	0.0118767	0.0109344	0.0100215	0.00708321	0.022353	0.0103154	0.013236	0.00965652	0.0150936	0.00895611	0.013617	0.0170157	0.0106892
0.0239415	0.028633	0.0331791	0.0346023	0.00728439	0.0198535	0.0226193	0.0199239	0.00554743	0.0202381	0.031979	0.00375716	0.0081143	0.0249774	0.00913737	0.0197822	0.019261	0.0124647	0.0159658	0.0299013	0.00667837	0.0175767	0.0212709	0.00436925	0.020901	0.0208749	0.0251961	0.0233313	0.0222386	0.0134278	0.0174749	0.00776165	0.00543894	0.012841	0.0551161	0.0567398	0.00664214	0.0122195	0.0105613	0.0105995	0.00692354	0.0225746	0.00986127	0.0135473	0.00941444	0.0150462	0.00958614	0.0141261	0.0171557	0.0104621
0.0239964	0.0293199	0.0335862	0.0343372	0.00696546	0.0193574	0.0222139	0.0201571	0.00621265	0.020147	0.0325544	0.00384631	0.0081911	0.0249194	0.00905194	0.0200538	0.0188873	0.0123279	0.0158336	0.0290616	0.00686189	0.0179688	0.0212152	0.00436921	0.0209673	0.0212605	0.0249697	0.0235903	0.0229271	0.0129987	0.0175862	0.00769803	0.00568811	0.0138289	0.0555914	0.0563402	0.00643772	0.0125515	0.0101721	0.0111824	0.00675052	0.0227885	0.00942742	0.0138405	0.00919946	0.0149667	0.010201	0.0146136	0.0172852	0.0102507
0.0240207	0.0299762	0.0339574	0.0340594	0.00665611	0.0188475	0.0217978	0.0203874	0.0068717	0.0200327	0.033119	0.00397024	0.0082538	0.0248275	0.00900336	0.020309	0.0184897	0.0121793	0.0156786	0.0282095	0.00711758	0.0183444	0.021128	0.00437186	0.021021	0.0216209	0.0247765	0.0238541	0.0236136	0.012568	0.0176788	0.00764478	0.00598583	0.0148098	0.056033	0.0559033	0.00622785	0.0128725	0.00978469	0.0117697	0.00656507	0.0230008	0.00902736	0.014112	0.00900299	0.0148494	0.0108004	0.015079	0.0174017	0.0100512
0.0240085	0.0306001	0.0342923	0.0337606	0.0063552	0.0183043	0.0213751	0.020602	0.00752295	0.0198944	0.0336725	0.00412571	0.0082979	0.0247318	0.00897875	0.0205377	0.0180678	0.0120059	0.0154984	0.0273364	0.00742812	0.0187004	0.0210291	0.00438283	0.0210717	0.0219553	0.0246327	0.0241246	0.0242866	0.0121401	0.0177614	0.00759191	0.00632039	0.0157795	0.0564358	0.0554229	0.00599192	0.0131838	0.0094308	0.012346	0.00636222	0.0232155	0.00865594	0.0143602	0.00881471	0.0146988	0.0114047	0.0155242	0.0175078	0.0098716
0.0239639	0.0311871	0.0345885	0.033439	0.00606258	0.0177385	0.0209481	0.0208058	0.00816567	0.0197281	0.0342165	0.00430217	0.0083252	0.0246322	0.00898761	0.0207389	0.017609	0.0118047	0.015294	0.0264604	0.00779292	0.0190312	0.0209058	0.00439736	0.0211163	0.022253	0.0245413	0.0243926	0.0249486	0.0117067	0.0178425	0.00754902	0.00667642	0.0167407	0.0568143	0.0549139	0.00573768	0.0135058	0.00909907	0.0129295	0.00614792	0.0234304	0.00832123	0.0145789	0.00864894	0.0145147	0.0119896	0.0159472	0.0175931	0.00970312
0.0238855	0.0317344	0.0348405	0.0330959	0.00578185	0.017127	0.0205112	0.0209946	0.00880177	0.0195314	0.0347534	0.00449869	0.00833658	0.02452	0.00902454	0.0209317	0.0171095	0.0115778	0.0150708	0.0255601	0.00819542	0.0193393	0.0207675	0.00441615	0.0211566	0.0225283	0.0244964	0.024657	0.0256185	0.0112755	0.017914	0.00750813	0.00705148	0.0176866	0.0571509	0.0543741	0.00549157	0.0138084	0.00877665	0.0135006	0.00592558	0.0236461	0.00802805	0.0147769	0.00850446	0.0143025	0.012552	0.0163369	0.0176677	0.00955181
0.0237667	0.032249	0.0350643	0.0327438	0.00551073	0.0164894	0.0200698	0.0211653	0.00943224	0.0193068	0.0352472	0.0047099	0.00833825	0.0244032	0.00909093	0.0210968	0.0166013	0.0113296	0.0148292	0.0246323	0.00862963	0.0196406	0.0206131	0.00442905	0.0211981	0.0227708	0.0245057	0.0249065	0.0262753	0.0108454	0.0179734	0.00747461	0.00744209	0.0186247	0.057461	0.0537936	0.00524743	0.0140779	0.00846886	0.0140662	0.00568733	0.0238594	0.00778411	0.0149541	0.00836809	0.0140593	0.0130938	0.0167114	0.0177184	0.009434
0.0236132	0.0327313	0.0352483	0.0323694	0.00525614	0.0158377	0.0196273	0.0213213	0.0100537	0.0190622	0.0357044	0.00493141	0.00832414	0.0242705	0.00918098	0.0212312	0.0160831	0.0110643	0.0145649	0.0237189	0.0091001	0.0199213	0.0204435	0.00444115	0.0212277	0.0229771	0.0245769	0.0251617	0.0269164	0.0104253	0.0180294	0.00745009	0.00784526	0.0195506	0.0577394	0.0531803	0.00500167	0.0143358	0.00817947	0.0146366	0.0054412	0.0240745	0.00759254	0.0151046	0.00824305	0.0137768	0.013617	0.0170585	0.0177459	0.00933949
0.0234172	0.0331791	0.0354003	0.0319716	0.00501791	0.015172	0.019185	0.0214552	0.0106596	0.0187899	0.0361505	0.00516345	0.00829238	0.0241263	0.00929177	0.0213499	0.0155468	0.0107714	0.0142821	0.0228005	0.00958906	0.0201932	0.0202682	0.00444949	0.0212571	0.0231501	0.0246965	0.0254173	0.0275315	0.0100015	0.0180636	0.00743009	0.00825422	0.0204623	0.0579994	0.0525341	0.00475921	0.014576	0.00792638	0.0152108	0.00518567	0.024287	0.00745545	0.0152278	0.0081276	0.0134674	0.0141261	0.0173992	0.0177624	0.00926957
0.0231859	0.0335862	0.0355152	0.0315621	0.00479326	0.0144813	0.0187558	0.0215746	0.0112575	0.0184945	0.036587	0.00539826	0.00824927	0.0239618	0.00942095	0.0214406	0.0149802	0.0104597	0.0139877	0.0218821	0.0100954	0.0204204	0.0200723	0.00445573	0.0212783	0.02329	0.0248703	0.0256709	0.0281347	0.0095765	0.018094	0.00740629	0.00866349	0.0213604	0.0582453	0.051862	0.00450676	0.0148198	0.00769828	0.0157791	0.00493078	0.0244985	0.0073723	0.0153171	0.00802107	0.0131342	0.0146136	0.0177225	0.0177623	0.0092241
0.0229236	0.0339574	0.0355886	0.031152	0.00458895	0.0137653	0.0183374	0.0216697	0.0118432	0.0181693	0.0370093	0.00563106	0.00818539	0.0237902	0.00956751	0.0214915	0.0143915	0.0101368	0.0136772	0.0209513	0.0106163	0.0206107	0.0198646	0.00445542	0.0212981	0.0234009	0.0250855	0.0259202	0.0287221	0.00916161	0.0181134	0.00739307	0.0090817	0.0222558	0.0584095	0.0511321	0.0042609	0.0150523	0.00751307	0.0163316	0.00467312	0.0247189	0.00734501	0.01539	0.00793024	0.0127637	0.015079	0.018004	0.017745	0.00920564
0.0226102	0.0342923	0.0356322	0.0307374	0.00439948	0.013028	0.0179308	0.0217468	0.012423	0.0178201	0.037406	0.00586308	0.00810532	0.023597	0.00972393	0.0215174	0.0137774	0.00978452	0.0133527	0.0200206	0.011145	0.0207747	0.0196374	0.00443841	0.0213155	0.023481	0.0253379	0.0261837	0.0292987	0.00874814	0.0181164	0.00739655	0.00950277	0.0231281	0.0585298	0.050386	0.00403281	0.0152628	0.00736773	0.0168775	0.00442322	0.0249337	0.00737366	0.0154283	0.00784386	0.0123668	0.0155242	0.0182703	0.017702	0.00921911
0.0222709	0.0345885	0.0356459	0.0303163	0.00423016	0.0122684	0.0175447	0.0218107	0.0129887	0.0174418	0.0377725	0.00609331	0.00801302	0.0233876	0.00988983	0.0215168	0.0131429	0.00940958	0.0130122	0.0190813	0.0116738	0.0209167	0.0194038	0.00441616	0.021327	0.0235319	0.0256317	0.026452	0.029848	0.00834587	0.0181134	0.00741225	0.0099132	0.0239709	0.0586193	0.0496191	0.0038137	0.0154557	0.0072625	0.0174237	0.00418164	0.0251536	0.00745326	0.015435	0.00776274	0.0119435	0.0159472	0.0185078	0.0176491	0.00925096
0.0218971	0.0348405	0.035622	0.0298991	0.0040814	0.0114885	0.017181	0.021847	0.0135374	0.0170347	0.038108	0.00632177	0.00790764	0.0231704	0.0100657	0.0214911	0.0124994	0.00900284	0.012663	0.018146	0.0122129	0.0210448	0.0191201	0.00438989	0.0213358	0.0235436	0.0259709	0.0266986	0.0303863	0.0079582	0.0180896	0.00744238	0.0103204	0.0247855	0.0586676	0.0488306	0.00359615	0.01565	0.00721693	0.0179769	0.0039545	0.0253967	0.00758611	0.0154108	0.00768993	0.0114857	0.0163369	0.0187213	0.0175706	0.00930552
0.021483	0.0350643	0.0355436	0.0294842	0.00395649	0.0106924	0.0168353	0.021866	0.0140784	0.0165927	0.0384221	0.0065436	0.00778382	0.0229409	0.0102422	0.021442	0.0118406	0.00857258	0.0123097	0.0172158	0.0127428	0.0211477	0.0188322	0.00435527	0.02134	0.0235292	0.0263412	0.0269458	0.0309112	0.00758089	0.0180644	0.0074418	0.0107175	0.0255945	0.0586863	0.0480293	0.00339772	0.0158196	0.00721629	0.0185035	0.00374705	0.0256125	0.00775784	0.0153481	0.00762119	0.0110096	0.0167114	0.018908	0.0174816	0.0093845
0.0210344	0.0352483	0.0354531	0.0290731	0.00385832	0.00987496	0.0165186	0.0218706	0.0146044	0.0161238	0.0387172	0.00675455	0.00764604	0.0226942	0.0104235	0.0213603	0.0111667	0.0081249	0.0119525	0.0162917	0.0132726	0.0212328	0.0185643	0.00431108	0.0213437	0.0234833	0.0267363	0.027183	0.0314132	0.00721965	0.0180221	0.00744117	0.0111131	0.0263873	0.0586515	0.047207	0.00321422	0.0159723	0.00726814	0.0190157	0.00356913	0.0258296	0.00797328	0.0152586	0.00754596	0.0105115	0.0170585	0.0190713	0.0173883	0.00948225
0.0205526	0.0354003	0.0353467	0.0286666	0.00378056	0.0090362	0.0162274	0.0218539	0.0151181	0.0156424	0.0389877	0.00695193	0.00749819	0.0224216	0.0106216	0.0212543	0.0104871	0.00766454	0.011588	0.0153783	0.0138046	0.0212829	0.0182855	0.00426263	0.0213403	0.0234118	0.0271503	0.0274166	0.0318951	0.00687074	0.017968	0.00744927	0.0115011	0.0271589	0.0585932	0.046356	0.00305547	0.0161232	0.00736156	0.0195128	0.00343799	0.0260693	0.00821726	0.0151399	0.00747242	0.00998749	0.0173992	0.0192169	0.0172714	0.00959673
0.0200332	0.0355152	0.0352071	0.0282656	0.00372832	0.0081887	0.0159781	0.0218212	0.0156196	0.0151322	0.0392303	0.00714019	0.00735627	0.02214	0.0108184	0.0211092	0.00979331	0.0071763	0.0112291	0.014478	0.0143271	0.0213117	0.0180126	0.0042038	0.0213366	0.0233096	0.0275791	0.0276512	0.0323502	0.00654427	0.0178985	0.00746015	0.0118815	0.0279062	0.0584974	0.0454659	0.00291773	0.0162447	0.00749401	0.0200065	0.00336982	0.0263085	0.00848821	0.0149896	0.00739587	0.00944235	0.0177225	0.0193472	0.0171452	0.00971975
0.0194721	0.0355886	0.0350394	0.0278782	0.00369905	0.00733135	0.0157756	0.0217751	0.0161111	0.0146002	0.039446	0.00731743	0.0072034	0.0218498	0.0110049	0.0209343	0.00908762	0.0066445	0.0108683	0.0136032	0.0148345	0.0213213	0.0177252	0.00413913	0.0213339	0.0231768	0.0280156	0.0278815	0.0327846	0.00623923	0.017826	0.00748338	0.0122542	0.028641	0.05836	0.0445619	0.00283803	0.0163648	0.00767468	0.0204963	0.00336206	0.0265395	0.00878429	0.014812	0.0073196	0.00887708	0.018004	0.0194508	0.0169893	0.00985778
0.0188811	0.0356322	0.0348427	0.0275018	0.00368893	0.00646702	0.0156127	0.0217087	0.0165892	0.0140453	0.0396331	0.00748241	0.00702695	0.0215469	0.0111917	0.0207264	0.0083849	0.00610394	0.0104996	0.0127507	0.0153328	0.0213053	0.0174412	0.0040651	0.0213316	0.0230236	0.0284497	0.0280998	0.0331876	0.00594581	0.017736	0.00750103	0.0126122	0.0293512	0.0581888	0.0436436	0.00281535	0.016472	0.00789075	0.0209714	0.00343119	0.0267678	0.00909973	0.0146096	0.0072417	0.00829663	0.0182703	0.019523	0.0168084	0.0100081
0.0182509	0.0356459	0.0346023	0.0271511	0.00369724	0.00558988	0.0154847	0.0216332	0.0170517	0.0134656	0.039793	0.00763601	0.00684607	0.0212356	0.0113741	0.020486	0.00766924	0.00554487	0.0101257	0.0119344	0.0158175	0.0212709	0.0171509	0.00398062	0.0213259	0.022841	0.0288976	0.0283177	0.0335753	0.00568234	0.0176617	0.0075197	0.0129589	0.0300702	0.057973	0.0427125	0.00283424	0.0165546	0.00813893	0.0214338	0.00357763	0.0269934	0.00942908	0.014375	0.00715606	0.00771034	0.0185078	0.0195755	0.0166215	0.010165
0.0175935	0.035622	0.0343372	0.0268222	0.00371627	0.00471794	0.0153902	0.0215421	0.0174993	0.01286	0.0399162	0.00778148	0.00664358	0.0209113	0.0115526	0.0202225	0.00695991	0.00496922	0.00978043	0.0111608	0.0162829	0.0212152	0.0168582	0.00389284	0.0213167	0.0226302	0.0293744	0.0285353	0.033928	0.00545171	0.017551	0.00753519	0.0132918	0.0307644	0.0577139	0.041772	0.0028973	0.0166271	0.00842537	0.021879	0.00379691	0.0272135	0.00975606	0.0141124	0.00706733	0.00710631	0.0187213	0.019601	0.0164136	0.0103198
0.0169043	0.0355436	0.0340594	0.0265108	0.00374151	0.00384052	0.0153418	0.0214368	0.0179336	0.0122333	0.0400123	0.00791025	0.00642559	0.0205755	0.0117222	0.0199265	0.00625656	0.00437026	0.00946427	0.010437	0.0167335	0.021128	0.0165635	0.00379725	0.0213104	0.0223986	0.0298395	0.0287341	0.0342672	0.00525622	0.0173887	0.00754978	0.0136075	0.0313779	0.0574283	0.0408242	0.00300627	0.016678	0.00872188	0.0223196	0.00408076	0.0274317	0.0100918	0.01383	0.00697551	0.00647851	0.018908	0.019595	0.0161946	0.0104737
0.0161787	0.0354531	0.0337606	0.0262212	0.0037872	0.00293958	0.0153319	0.0213223	0.0183565	0.0115793	0.0400721	0.00801892	0.00620452	0.0202245	0.0118872	0.0196084	0.00555729	0.00375881	0.00916149	0.00977736	0.0171671	0.0210291	0.0162764	0.00369107	0.0213003	0.0221392	0.0302944	0.0289257	0.0345845	0.00510268	0.0172387	0.00756185	0.013908	0.0319735	0.0571045	0.0398641	0.00318242	0.0167119	0.00904624	0.0227425	0.00442505	0.0276462	0.0104272	0.0135226	0.00688474	0.00585533	0.0190713	0.0195769	0.0159673	0.0106368
0.0154298	0.0353467	0.033439	0.0259509	0.0038523	0.00206705	0.0153617	0.0211965	0.0187624	0.0109077	0.0401003	0.0081143	0.00598535	0.0198688	0.0120403	0.019261	0.00487305	0.00314455	0.00888918	0.00919009	0.0175767	0.0209058	0.0159905	0.00357571	0.0212912	0.0218601	0.030737	0.0291085	0.0348665	0.00498758	0.0170764	0.00758279	0.0141904	0.0325462	0.0567398	0.0388827	0.00339157	0.0167338	0.00937759	0.0231551	0.00481544	0.0278593	0.0107602	0.0131894	0.00678489	0.00522887	0.0192169	0.0195441	0.0157268	0.0107984
0.014646	0.0352071	0.0330959	0.0257126	0.00392584	0.00133635	0.0154311	0.02106	0.0191578	0.0102237	0.0400982	0.0081911	0.00575772	0.0194985	0.0121777	0.0188873	0.00422046	0.00252293	0.00865019	0.00869193	0.0179688	0.0207675	0.0156977	0.00345762	0.0212799	0.0215659	0.0311659	0.0292764	0.0351247	0.0049119	0.0169059	0.00759377	0.0144608	0.0331004	0.0563402	0.0378943	0.00363316	0.0167346	0.00972982	0.0235513	0.00525377	0.0280668	0.0110883	0.0128411	0.00668018	0.004605	0.0193472	0.0194809	0.0154755	0.0109502
0.0138327	0.0350394	0.0327438	0.0255065	0.00400207	0.00105348	0.0155164	0.0209221	0.0195321	0.00951657	0.0400688	0.0082538	0.0055237	0.0191143	0.0122957	0.0184897	0.00361207	0.00191715	0.00845543	0.0083027	0.0183444	0.0206131	0.0154286	0.00333916	0.0212679	0.0212585	0.0315771	0.0294402	0.035369	0.0048751	0.0167248	0.00759992	0.0147194	0.033644	0.0559033	0.0369104	0.00389451	0.0167251	0.0100865	0.0239405	0.00572814	0.0282715	0.0114123	0.0124765	0.00656762	0.00400054	0.0194508	0.0194046	0.0152161	0.0110989
0.0129989	0.0348427	0.0323694	0.025335	0.00408162	0.00148517	0.0156287	0.0207739	0.0198978	0.00880274	0.0400006	0.0082979	0.00528131	0.0187253	0.0123998	0.0180678	0.00308426	0.00137428	0.0082945	0.00803469	0.0187004	0.0204435	0.0151653	0.00321793	0.0212557	0.0209297	0.0319682	0.0295906	0.035582	0.00487793	0.0165383	0.00760267	0.0149614	0.0341655	0.0554229	0.0359225	0.00420152	0.0167028	0.0104511	0.024315	0.00623066	0.0284579	0.0117205	0.012101	0.00644959	0.00342175	0.019523	0.0193029	0.0149401	0.0112367
0.0121362	0.0346023	0.0319716	0.0251984	0.00416709	0.0022465	0.0157707	0.0206179	0.0202535	0.0080918	0.0398995	0.0083252	0.00503587	0.0183271	0.0124894	0.017609	0.00268099	0.00105813	0.00818273	0.00788239	0.0190312	0.0202682	0.0148988	0.00309066	0.0212422	0.0205796	0.0323384	0.0297288	0.0357731	0.00491262	0.0163401	0.00760122	0.0152077	0.0346514	0.0549139	0.0349346	0.00451608	0.0166775	0.0108248	0.0246653	0.00676244	0.0286425	0.0120201	0.0117203	0.00633516	0.00289772	0.0195755	0.0191882	0.0146515	0.0113673
0.011249	0.0343372	0.0315621	0.0250923	0.0042567	0.00310234	0.0159363	0.0204602	0.0205946	0.00736873	0.039768	0.00833658	0.00479007	0.0179219	0.0125666	0.0171095	0.00245807	0.00120403	0.00812049	0.00786183	0.0193393	0.0200723	0.0146434	0.00296107	0.0212168	0.0202173	0.0326829	0.0298572	0.0359254	0.00498782	0.016135	0.00760835	0.0154305	0.0351027	0.0543741	0.0339452	0.00482778	0.0166104	0.0111895	0.0249998	0.00731464	0.0288175	0.0123057	0.0113363	0.00620858	0.00246819	0.019601	0.0190512	0.0143607	0.0114859
0.010341	0.0340594	0.031152	0.0250094	0.00435423	0.00398995	0.0161231	0.0203001	0.0209214	0.0066285	0.0396013	0.00833825	0.00453564	0.0175079	0.0126262	0.0166013	0.00249462	0.0017258	0.00811119	0.00795566	0.0196406	0.0198646	0.0143961	0.00283043	0.0211887	0.0198451	0.0330024	0.0299808	0.0360434	0.00509139	0.0159154	0.00761609	0.0156138	0.0355209	0.0537936	0.0329632	0.00515717	0.0164926	0.0115471	0.0253202	0.00788526	0.0289815	0.0125727	0.0109564	0.00607169	0.00219326	0.019595	0.0189053	0.0140687	0.0115977
0.00941512	0.0337606	0.0307374	0.0249688	0.00445019	0.00488471	0.0163204	0.0201415	0.0212349	0.0058944	0.0394114	0.00832414	0.00428049	0.017095	0.0126668	0.0160831	0.00277959	0.00241168	0.00815797	0.0081665	0.0199213	0.0196374	0.014164	0.00270493	0.0211623	0.0194611	0.0332915	0.0300895	0.0361458	0.00522645	0.0156842	0.00761693	0.0157788	0.035917	0.0531803	0.03198	0.00549784	0.016382	0.0119042	0.0256209	0.00847416	0.029135	0.012834	0.010583	0.00593904	0.00213313	0.0195769	0.0187447	0.0137763	0.0117048
0.00845935	0.033439	0.0303163	0.0249584	0.00452626	0.00578509	0.0165407	0.019982	0.0215388	0.00517067	0.0391899	0.00829238	0.00401278	0.0166719	0.0126946	0.0155468	0.00323399	0.00314488	0.00826285	0.00848321	0.0201932	0.0194038	0.013937	0.00258198	0.0211646	0.0190583	0.0335525	0.0301739	0.0362157	0.00538916	0.0154414	0.00761272	0.0159196	0.0362937	0.0525341	0.0310047	0.00584129	0.0162578	0.0122588	0.0259018	0.00907972	0.0292849	0.0130698	0.0102327	0.00580524	0.00231729	0.0195441	0.0185959	0.0134875	0.0117982
0.0074945	0.0330959	0.0298991	0.0249783	0.00459588	0.006684	0.0167827	0.0198242	0.0218282	0.00447021	0.0389346	0.00824927	0.00374995	0.0162435	0.0127022	0.0149802	0.00379804	0.00392135	0.00842276	0.00888053	0.0204204	0.0191201	0.0137194	0.00245916	0.0211392	0.0186459	0.0337732	0.0302472	0.0362653	0.00556349	0.0151918	0.00761132	0.0160456	0.0366326	0.051862	0.0300396	0.00619902	0.0161187	0.0126023	0.026169	0.00968996	0.029414	0.0132904	0.00990114	0.0056717	0.00270358	0.0194809	0.0184317	0.0131964	0.0118811
0.0065248	0.0327438	0.0294842	0.0250382	0.00467175	0.00757917	0.0170208	0.0196689	0.0221004	0.00382199	0.038645	0.00818539	0.00349761	0.0158137	0.0126937	0.0143915	0.00443224	0.00472796	0.00863493	0.00934732	0.0206107	0.0188322	0.0135219	0.00234722	0.0210757	0.0182341	0.0339644	0.0302945	0.0362769	0.00575466	0.0149395	0.00761779	0.0161567	0.0369383	0.0511321	0.0290953	0.00656672	0.0159638	0.0129371	0.0264152	0.0103221	0.0295324	0.013489	0.00961093	0.0055415	0.00321144	0.0194046	0.0181936	0.0129077	0.0119371
0.0055621	0.0323694	0.0290731	0.0251278	0.00473673	0.00846891	0.017249	0.019515	0.0223597	0.00326816	0.0383312	0.00810532	0.00324653	0.0153781	0.0126672	0.0137774	0.0051032	0.00555269	0.00887878	0.00987261	0.0207747	0.0185643	0.0133336	0.00224974	0.0210289	0.017821	0.0341192	0.0303225	0.0362753	0.0059562	0.0146749	0.0076271	0.0162506	0.0372087	0.050386	0.0281645	0.00693548	0.0157941	0.0132581	0.0266417	0.0109569	0.0296389	0.0136715	0.00936946	0.00540845	0.00378915	0.0193029	0.0179583	0.0126318	0.0119754
0.00460906	0.0319716	0.0286666	0.0252483	0.0048034	0.00935268	0.0174744	0.0193622	0.0226107	0.00287706	0.0379913	0.00801302	0.0030058	0.0149407	0.0126283	0.0131429	0.00579331	0.00639463	0.00915915	0.0104437	0.0209167	0.0182855	0.0131664	0.00216951	0.0209795	0.017399	0.0342422	0.0303467	0.0362346	0.00617165	0.0143986	0.00766256	0.0163298	0.0374571	0.0496191	0.0272566	0.00730423	0.0156031	0.0135745	0.0268726	0.0116074	0.0297484	0.0138344	0.00917997	0.00528231	0.00440527	0.0191882	0.0177175	0.0123588	0.0119992
0.0036923	0.0315621	0.0282656	0.0254014	0.00486054	0.0102286	0.0176988	0.0192141	0.0228569	0.00273176	0.0376256	0.00790764	0.00277851	0.014499	0.0125693	0.0124994	0.00649655	0.00724353	0.00947158	0.0110403	0.0210448	0.0180126	0.0129919	0.00210395	0.0209361	0.0170058	0.0343199	0.0303815	0.0361684	0.00639278	0.0141128	0.00773651	0.016384	0.0376709	0.0488306	0.0263783	0.0076671	0.0153921	0.0138772	0.0270903	0.0122649	0.0298697	0.0139808	0.00904838	0.00516374	0.00504557	0.0190512	0.0174752	0.0120953	0.0120047
0.00286254	0.031152	0.0278782	0.0255755	0.00490857	0.0110965	0.0179139	0.0190668	0.0230887	0.00288757	0.0372321	0.00778382	0.00257146	0.0140538	0.0125005	0.0118406	0.00720076	0.00810294	0.00981215	0.0116641	0.0211477	0.0177252	0.0128295	0.00206228	0.0208852	0.016619	0.034361	0.0303839	0.0360874	0.00662185	0.0138173	0.00777388	0.0164166	0.0378504	0.0480293	0.0255259	0.00803056	0.0151687	0.0141635	0.0272437	0.0129254	0.029923	0.0141122	0.00898872	0.00504835	0.0056916	0.0189053	0.0172337	0.0118475	0.0119961
0.0022756	0.0307374	0.0275018	0.0257522	0.00494629	0.0119468	0.0181086	0.0189203	0.023288	0.00331412	0.0368095	0.00764604	0.00239265	0.0136099	0.0124116	0.0111667	0.00790747	0.00896924	0.0101889	0.0122968	0.0212328	0.0174412	0.0126915	0.00204597	0.0208294	0.0162298	0.0343586	0.0303626	0.0359743	0.00686252	0.0135128	0.00779531	0.0164305	0.0380122	0.047207	0.0247	0.00838887	0.0149224	0.0144454	0.0273783	0.0135829	0.0299569	0.0142076	0.00901573	0.00494626	0.0063441	0.0187447	0.0169925	0.0116168	0.0119674
0.0021079	0.0303163	0.0271511	0.0259645	0.00496415	0.0127785	0.0182972	0.018794	0.0234886	0.00393213	0.0363568	0.00749819	0.00226926	0.0131741	0.0123274	0.0104871	0.00860533	0.00985119	0.0105866	0.0129385	0.0212829	0.0171509	0.012579	0.002049	0.0207623	0.0158469	0.0343193	0.0303223	0.0358338	0.00710914	0.0132043	0.00783191	0.0164193	0.0381364	0.046356	0.0238994	0.00874788	0.0146621	0.0147056	0.0275001	0.0142443	0.0299856	0.0142895	0.00912124	0.00485398	0.0070057	0.0185959	0.0167421	0.011412	0.0119277
0.00247086	0.0298991	0.0268222	0.0262049	0.00498236	0.013597	0.0184691	0.0186979	0.0236866	0.00466916	0.0358773	0.00735627	0.00221982	0.0127398	0.0122151	0.00979331	0.00929935	0.0107377	0.0109979	0.0135797	0.0213117	0.0168582	0.0124973	0.00209043	0.020697	0.0154701	0.0342406	0.0302676	0.0356715	0.00735926	0.012881	0.00788463	0.0163873	0.0382341	0.0454659	0.0231394	0.00909926	0.0143876	0.0149448	0.0275922	0.0149171	0.0300052	0.0143464	0.00931684	0.00477162	0.00766255	0.0184317	0.016486	0.0112277	0.0118746
0.00321377	0.0294842	0.0265108	0.0264601	0.00499009	0.014392	0.0186229	0.0186077	0.0238747	0.00547986	0.0353693	0.0072034	0.00219024	0.0123059	0.0120479	0.00908762	0.00998878	0.0116334	0.0114165	0.0142181	0.0213213	0.0165635	0.0124161	0.00216535	0.0206183	0.0151057	0.0341154	0.0301907	0.0354829	0.007612	0.0125558	0.00794371	0.0163379	0.0382931	0.0445619	0.0224194	0.00945046	0.0140927	0.0151739	0.0276633	0.0155833	0.0299901	0.0143846	0.00959908	0.00469941	0.00831663	0.0181936	0.0162341	0.0110725	0.0117977
0.00413923	0.0290731	0.0262212	0.0267119	0.00499035	0.0151738	0.0187514	0.0185311	0.0240427	0.0063461	0.0348432	0.00702695	0.00220764	0.0118762	0.0118793	0.0083849	0.0106643	0.0125291	0.0118343	0.0148486	0.0213053	0.0162764	0.012345	0.00226618	0.0205319	0.0147664	0.0339526	0.0300859	0.0352765	0.0078558	0.0122223	0.00801245	0.0162641	0.0383159	0.0436436	0.0217436	0.0097964	0.0137878	0.0153784	0.0277126	0.0162518	0.0299349	0.0144043	0.00996492	0.00464226	0.00895611	0.0179583	0.0159859	0.0109356	0.0117034
0.00514657	0.0286666	0.0259509	0.0269701	0.00498977	0.0159333	0.0188549	0.0184665	0.0242002	0.00724802	0.0342753	0.00684607	0.00227055	0.0114548	0.0116999	0.00766924	0.011329	0.0134195	0.0122711	0.0154658	0.0212709	0.0159905	0.0122836	0.00239469	0.0204447	0.014448	0.0337656	0.0299793	0.0350466	0.0080943	0.011888	0.0081002	0.0161701	0.0383249	0.0427125	0.0211063	0.0101383	0.0134702	0.0155657	0.0277464	0.0169123	0.0298672	0.0144017	0.0104054	0.00459802	0.00958614	0.0177175	0.0157366	0.0108337	0.011593
0.00620575	0.0282656	0.0257126	0.0272404	0.0049756	0.0166749	0.0189335	0.0184074	0.0243481	0.0081786	0.0336844	0.00664358	0.00240357	0.0110414	0.0115183	0.00695991	0.011976	0.0143094	0.012733	0.0160722	0.0212152	0.0156977	0.01223	0.00255025	0.0203472	0.0141456	0.0335455	0.0298471	0.0347941	0.00833131	0.0115445	0.0081897	0.0160618	0.0382858	0.041772	0.0205211	0.0104776	0.0131298	0.0157308	0.0277578	0.0175742	0.0297868	0.0143825	0.010913	0.00455838	0.010201	0.0174752	0.0154941	0.0107584	0.0114645
0.00728549	0.0278782	0.0255065	0.0275151	0.00494704	0.0173887	0.0189857	0.0183597	0.0244884	0.00913106	0.0330898	0.00642559	0.00259503	0.0106385	0.0113216	0.00625656	0.0126083	0.0151962	0.0131515	0.016657	0.021128	0.0154286	0.0121878	0.00272443	0.0202404	0.0138679	0.0332398	0.0297096	0.0345189	0.00856446	0.0111734	0.00829416	0.0159283	0.038191	0.0408242	0.0199788	0.0108157	0.0127815	0.0158704	0.0277452	0.018234	0.0296906	0.0143416	0.0114805	0.00453299	0.0108004	0.0172337	0.0152591	0.0107165	0.0113224
0.00837079	0.0275018	0.025335	0.0277946	0.00490851	0.018083	0.0190085	0.0183209	0.0246198	0.0100876	0.0324788	0.00620452	0.00281407	0.0102483	0.0111176	0.00555729	0.0132262	0.0160798	0.0135498	0.0172203	0.0210291	0.0151653	0.0121592	0.0029116	0.0201285	0.0136123	0.0328841	0.0295538	0.0342155	0.00879585	0.0108073	0.00840575	0.015779	0.0380931	0.0398641	0.0195043	0.0111441	0.0124224	0.0159885	0.0277118	0.0188756	0.029571	0.014281	0.0121039	0.00452024	0.0114047	0.0169925	0.0150268	0.0107087	0.0111662
0.00945589	0.0271511	0.0251984	0.0280766	0.00486522	0.0187566	0.0190008	0.0182857	0.0247366	0.0110549	0.0318511	0.00598535	0.00306721	0.00987571	0.0109033	0.00487305	0.0138259	0.0169597	0.0139527	0.0177756	0.0209058	0.0148988	0.0121392	0.00311717	0.0200069	0.0133856	0.0324896	0.0293757	0.0339167	0.00903287	0.0104435	0.00853359	0.0156055	0.0379758	0.0388827	0.0190881	0.0114656	0.0120548	0.0160797	0.0276518	0.0195117	0.0294347	0.0142076	0.0127755	0.00453196	0.0119896	0.0167421	0.0147996	0.0107269	0.0109957
0.0105452	0.0268222	0.0250923	0.0283549	0.00481512	0.0194043	0.0189637	0.0182651	0.0248582	0.0120339	0.0312007	0.00575772	0.00334724	0.00951656	0.0106768	0.00422046	0.0144028	0.0178463	0.0143411	0.0183015	0.0207675	0.0146434	0.0121277	0.00333734	0.0198798	0.0131898	0.0320637	0.0291766	0.0335854	0.00927336	0.0100849	0.0086638	0.0154082	0.037816	0.0378943	0.0187331	0.0117832	0.0116863	0.0161478	0.027569	0.0201457	0.0292811	0.0141372	0.0134886	0.00454852	0.012552	0.016486	0.0145818	0.0107918	0.0108099
0.0116356	0.0265108	0.0250094	0.02863	0.00475447	0.0200278	0.0188913	0.018263	0.0249687	0.0130178	0.0305408	0.0055237	0.00362861	0.00916875	0.0104438	0.00361207	0.014958	0.0187368	0.0147299	0.0188061	0.0206131	0.0143961	0.0121244	0.00357109	0.0197531	0.0130296	0.0316037	0.0289573	0.0332216	0.00950269	0.00971288	0.00879827	0.0152011	0.0376219	0.0369104	0.0184403	0.0121022	0.0113139	0.016197	0.0274623	0.0207629	0.0291085	0.0140436	0.0142267	0.00456927	0.0130938	0.0162341	0.0143826	0.0108809	0.0106117
0.012723	0.0262212	0.0249688	0.0288955	0.00468925	0.0206246	0.0187825	0.0182703	0.0250732	0.0140101	0.0298756	0.00528131	0.00391638	0.0088431	0.0101969	0.00308426	0.0154928	0.0195993	0.0151124	0.0192853	0.0204435	0.014164	0.0121226	0.00380614	0.0196123	0.0128948	0.0310979	0.0287225	0.0328428	0.00972366	0.00933284	0.00893913	0.0149762	0.0373901	0.0359225	0.0181985	0.0124027	0.0109344	0.0162131	0.0273246	0.0213699	0.0289054	0.0139253	0.0149918	0.00461764	0.013617	0.0159859	0.0141906	0.0110037	0.0104089
0.0138114	0.0259509	0.0249584	0.0291407	0.00461519	0.021187	0.0186396	0.0182852	0.0251672	0.0150062	0.0291919	0.00503587	0.0042206	0.00854629	0.00993899	0.00268099	0.0160079	0.0204513	0.0154781	0.0197449	0.0202682	0.013937	0.0121361	0.0040504	0.0194676	0.0127888	0.0305512	0.0284691	0.0324579	0.00994616	0.00895439	0.00909543	0.0147567	0.0371245	0.0349346	0.0180179	0.0126949	0.0105613	0.0162176	0.0271706	0.0219714	0.0286792	0.0137928	0.0157811	0.00468007	0.0141261	0.0157366	0.0140145	0.0111503	0.0101976
0.0148907	0.0257126	0.0249783	0.0293769	0.00452522	0.0217228	0.0184606	0.0183141	0.0252576	0.0160122	0.0284997	0.00479007	0.00453617	0.00827639	0.00967623	0.00245807	0.0164955	0.0213029	0.0158253	0.0201803	0.0200723	0.0137194	0.0121623	0.00430479	0.0193062	0.0127129	0.0299558	0.0281987	0.0320088	0.010172	0.00856374	0.00926242	0.0144724	0.0368277	0.0339452	0.0178964	0.0129805	0.0101721	0.0161959	0.026987	0.022555	0.0284312	0.0136424	0.0165893	0.004756	0.0146136	0.0154941	0.0138538	0.0113192	0.00998037
0.015954	0.0255065	0.0250382	0.0296088	0.00442901	0.022237	0.0182446	0.0183529	0.0253389	0.0170195	0.0277944	0.00453564	0.00487112	0.00802672	0.00941387	0.00249462	0.0169336	0.0221316	0.0161483	0.0205913	0.0198646	0.0135219	0.0121952	0.00456554	0.0191485	0.0126701	0.02931	0.0279063	0.031543	0.0103933	0.00817159	0.00943204	0.0141458	0.0365043	0.0329632	0.0178422	0.0132573	0.00978469	0.0161345	0.0267789	0.0231266	0.0281596	0.0134823	0.0174115	0.00482948	0.015079	0.0152591	0.0137087	0.0115153	0.0097643
0.0169978	0.025335	0.0251278	0.0298217	0.00433356	0.0227148	0.0179913	0.0183981	0.0254124	0.0180195	0.0270704	0.00428049	0.0052062	0.00780743	0.00914411	0.00277959	0.017361	0.0229367	0.0164616	0.0209798	0.0196374	0.0133336	0.0122352	0.0048252	0.0189898	0.0126594	0.0286282	0.0275937	0.0311027	0.0106126	0.00776923	0.00960877	0.013838	0.0361535	0.03198	0.0178326	0.0135373	0.0094308	0.0160512	0.02655	0.0236793	0.0278696	0.0133116	0.0182421	0.00490786	0.0155242	0.0150268	0.0135707	0.0117324	0.00953957
0.0180298	0.0251984	0.0252483	0.0300145	0.00422261	0.0231602	0.0177265	0.0184468	0.0254883	0.0190167	0.0263543	0.00401278	0.00554387	0.00762064	0.00888046	0.00323399	0.0177703	0.0237199	0.0167555	0.0213439	0.0194038	0.0131664	0.0122834	0.00509002	0.0188495	0.0126814	0.0279191	0.0272784	0.03064	0.0108309	0.00736619	0.00979021	0.0135144	0.0357712	0.0310047	0.0178649	0.0138016	0.00909907	0.015938	0.0262922	0.0242112	0.027557	0.0131275	0.0190771	0.00499668	0.0159472	0.0147996	0.0134553	0.0119646	0.00932113
0.019045	0.0250923	0.0254014	0.0301926	0.00410707	0.023572	0.0174229	0.0184983	0.0255752	0.0200074	0.0256222	0.00374995	0.00587543	0.00747778	0.00861295	0.00379804	0.0181394	0.0244833	0.0170228	0.0216795	0.0191201	0.0129919	0.012341	0.00535574	0.0186688	0.012721	0.0271667	0.0269352	0.0301763	0.0110455	0.00696487	0.0099733	0.0131854	0.0353604	0.0300396	0.0179381	0.0140567	0.00877665	0.015799	0.0260067	0.0247282	0.0272174	0.0129349	0.0199158	0.00509212	0.0163369	0.0145818	0.0133349	0.0122119	0.00911343
0.0200473	0.0250094	0.0255755	0.0303426	0.00398476	0.0239505	0.017045	0.0185501	0.025657	0.0209969	0.0248972	0.00349761	0.00619784	0.00736553	0.00835183	0.00443224	0.0184862	0.0252237	0.017277	0.0219885	0.0188322	0.0128295	0.0123988	0.00562215	0.0184423	0.0127799	0.0263785	0.0265728	0.0296946	0.0112559	0.00656288	0.0101484	0.0128401	0.0349254	0.0290953	0.0180511	0.0143003	0.00846886	0.0156445	0.0257036	0.025227	0.0268648	0.0127382	0.0207584	0.00519665	0.0167114	0.0143826	0.0132363	0.0124726	0.00891115
0.0210234	0.0249688	0.0257522	0.0304759	0.0038518	0.0242991	0.0166348	0.018608	0.0257124	0.0219814	0.02419	0.00324653	0.00651225	0.00728944	0.00808492	0.0051032	0.0188071	0.0259351	0.017515	0.0222729	0.0185643	0.0126915	0.0124626	0.00589365	0.0182347	0.0128602	0.0255581	0.0261989	0.0292031	0.0114609	0.00615831	0.0103461	0.0124851	0.0344601	0.0281645	0.0181978	0.014541	0.00817947	0.0154633	0.0253691	0.0257041	0.0264783	0.0125383	0.0216014	0.00530799	0.0170585	0.0141906	0.013172	0.0127408	0.00872456
0.0219751	0.0249584	0.0259645	0.0305946	0.00369662	0.024611	0.0161846	0.018668	0.025766	0.0229638	0.0234923	0.0030058	0.00681647	0.0072577	0.00782432	0.00579331	0.0191202	0.0266191	0.017721	0.0225302	0.0182855	0.012579	0.0125346	0.00615912	0.0180263	0.0129691	0.0246994	0.025824	0.0287094	0.0116686	0.00575713	0.010549	0.0121138	0.0339738	0.0272566	0.0183778	0.0147732	0.00792638	0.015251	0.0250129	0.0261583	0.0260824	0.012339	0.0224317	0.00542826	0.0173992	0.0140145	0.0131195	0.0130172	0.00855312
0.0229016	0.0249783	0.0262049	0.0306952	0.00353388	0.0248947	0.0157097	0.0187147	0.0258154	0.0239372	0.0228028	0.00277851	0.00711833	0.00726065	0.00757633	0.00649655	0.0194026	0.0272737	0.0179005	0.0227635	0.0180126	0.0124973	0.0126136	0.0064364	0.0178275	0.0130906	0.0238025	0.0254603	0.0282084	0.011873	0.00535674	0.0107653	0.0117282	0.0334607	0.0263783	0.0185845	0.0149972	0.00769828	0.0150184	0.0246414	0.0265939	0.0256679	0.0121444	0.0232556	0.00555267	0.0177225	0.0138538	0.0130794	0.0133036	0.0084112
0.0238071	0.0250382	0.0264601	0.0307622	0.00338583	0.0251398	0.0151993	0.018764	0.0258684	0.0248972	0.0221212	0.00257146	0.00742068	0.00729874	0.00732538	0.00720076	0.0196258	0.0279109	0.0180637	0.0229651	0.0177252	0.0124161	0.0126922	0.00670965	0.0176161	0.0132309	0.0228746	0.0250402	0.0276885	0.0120724	0.00495392	0.0109803	0.0113447	0.0329215	0.0255259	0.0188189	0.0152137	0.00751307	0.0147588	0.0242264	0.0270107	0.02521	0.0119568	0.0240716	0.00568091	0.018004	0.0137087	0.0130541	0.0135857	0.00829474
0.0246795	0.0251278	0.0267119	0.030801	0.00322287	0.0253512	0.0146554	0.0188117	0.0259253	0.0258431	0.021449	0.00239265	0.0077165	0.0073762	0.00708528	0.00790747	0.0198075	0.028528	0.0181961	0.0231432	0.0174412	0.012345	0.0127812	0.00698025	0.017406	0.0133993	0.0219065	0.024602	0.0271499	0.0122687	0.00455269	0.0111737	0.0109413	0.0323561	0.0247	0.0190652	0.0154241	0.00736773	0.0144651	0.0237968	0.0274104	0.0247446	0.0117724	0.0248803	0.00580877	0.0182703	0.0135707	0.0130409	0.0138746	0.00821585
0.0255487	0.0252483	0.0269701	0.0308159	0.00304684	0.0255366	0.0140732	0.0188609	0.0259752	0.0267915	0.0208016	0.00226926	0.00800027	0.00748956	0.006861	0.00860533	0.0199648	0.0291094	0.0183052	0.0232996	0.0171509	0.0122836	0.0128682	0.00725532	0.0171865	0.0135809	0.020907	0.0241528	0.0266032	0.0124601	0.00415462	0.0113696	0.01053	0.0317719	0.0238994	0.0193216	0.0156209	0.0072625	0.014151	0.0233514	0.0277974	0.0242696	0.011595	0.0256758	0.00594379	0.0185078	0.0134553	0.0130382	0.0141624	0.00817069
0.0263982	0.0254014	0.0272404	0.0308076	0.002864	0.0256838	0.0134509	0.018901	0.0260242	0.0277293	0.0201813	0.00221982	0.00825744	0.00763588	0.00664477	0.00929935	0.0200912	0.0296645	0.0183896	0.0234287	0.0168582	0.01223	0.0129532	0.00752234	0.016965	0.0137665	0.0198869	0.0236858	0.0260556	0.0126566	0.00376547	0.0115718	0.0101186	0.0311661	0.0231394	0.0195896	0.0158002	0.00721693	0.0138092	0.0228836	0.0281452	0.0237808	0.0114314	0.0264516	0.0060847	0.0187213	0.0133349	0.0130452	0.0144415	0.00816527
0.0271762	0.0255755	0.0275151	0.0307705	0.00267633	0.0258273	0.012801	0.0189206	0.0260717	0.0286366	0.0195792	0.00219024	0.00849537	0.00781542	0.00642333	0.00998878	0.0201913	0.0301796	0.0184467	0.0235297	0.0165635	0.0121878	0.0130489	0.00777979	0.0167467	0.0139472	0.0188354	0.0232181	0.0254996	0.0128497	0.00338624	0.0117775	0.00969627	0.0305448	0.0224194	0.0198523	0.0159731	0.00721629	0.0134452	0.0224002	0.0284566	0.023274	0.0112823	0.0272198	0.00622806	0.018908	0.0132363	0.0130495	0.0147155	0.00821339
0.0279183	0.0257522	0.0277946	0.0307124	0.00248131	0.025941	0.0121138	0.0189349	0.026117	0.0295421	0.0190107	0.00220764	0.00873493	0.00801709	0.00622363	0.0106643	0.0202598	0.0306609	0.018484	0.0236118	0.0162764	0.0121592	0.0131403	0.008046	0.0165194	0.0141275	0.0177607	0.0227395	0.0249329	0.0130366	0.00301778	0.0119733	0.00927508	0.0299058	0.0217436	0.0201174	0.0161394	0.00726814	0.0130712	0.0218953	0.0287518	0.0227451	0.0111515	0.0279581	0.00638238	0.0190713	0.013172	0.0130687	0.0149866	0.00830216
0.028633	0.0259645	0.0280766	0.0306193	0.0022888	0.0259986	0.011392	0.0189441	0.0261608	0.0304335	0.0184679	0.00227055	0.00897074	0.00823957	0.00604857	0.011329	0.0202895	0.0311138	0.0185202	0.0236582	0.0159905	0.0121392	0.0132396	0.00830788	0.0162879	0.0143108	0.0166745	0.0222555	0.0243663	0.0132177	0.00265923	0.0121595	0.00885083	0.0292387	0.0211063	0.0203791	0.016284	0.00736156	0.0126606	0.0213704	0.0290176	0.0221951	0.0110408	0.028679	0.00654402	0.0192169	0.0131195	0.0130949	0.0152432	0.00844646
0.0293199	0.0262049	0.0283549	0.0304947	0.00209515	0.026008	0.0106373	0.0189343	0.0262045	0.0313017	0.017963	0.00240357	0.00919346	0.00849639	0.00590278	0.011976	0.0202872	0.0315338	0.0185246	0.0236835	0.0156977	0.0121277	0.0133486	0.00856801	0.0160537	0.0144992	0.0155596	0.0217619	0.0237978	0.0133999	0.0023189	0.0123441	0.00843564	0.0285552	0.0205211	0.0206365	0.0164202	0.00749401	0.0122251	0.0208239	0.0292565	0.0216239	0.0109506	0.0293799	0.00670764	0.0193472	0.0130794	0.013124	0.0154942	0.00863892
0.0299762	0.0264601	0.02863	0.0303515	0.0018996	0.0259808	0.00985992	0.0189209	0.0262462	0.0321452	0.0174926	0.00259503	0.00939743	0.0087762	0.00577396	0.0126083	0.0202598	0.031919	0.0184688	0.0236823	0.0154286	0.0121244	0.0134623	0.00882216	0.0158231	0.0146853	0.0144036	0.0212619	0.0232318	0.0135792	0.00201403	0.012536	0.00802565	0.0278561	0.0199788	0.0208824	0.0165483	0.00767468	0.0117841	0.0202598	0.0294702	0.0210408	0.01088	0.0300575	0.00687535	0.0194508	0.0130541	0.0131676	0.0157298	0.00888319
0.0306001	0.0267119	0.0288955	0.0301819	0.0017113	0.0259165	0.00904395	0.0189035	0.0262947	0.0329772	0.017058	0.00281407	0.00958289	0.00907302	0.00566128	0.0132262	0.0202036	0.0322595	0.0183812	0.0236628	0.0151653	0.0121226	0.013583	0.00906639	0.0155769	0.0148717	0.0132584	0.0207511	0.0226687	0.0137495	0.00173681	0.0127198	0.00761852	0.027138	0.0195043	0.021113	0.0166696	0.00789075	0.0113283	0.0196724	0.0296628	0.0204411	0.0108472	0.0307097	0.00704562	0.019523	0.0130409	0.0132082	0.0159352	0.0091767
0.0311871	0.0269701	0.0291407	0.0299872	0.00152863	0.0258188	0.00820283	0.0188748	0.0263477	0.0337872	0.0166669	0.00306721	0.0097587	0.00938708	0.00557298	0.0138259	0.0201163	0.0325627	0.0182711	0.0236207	0.0148988	0.0121361	0.0137082	0.00931612	0.0153309	0.0150521	0.0121169	0.0202328	0.0221011	0.0139226	0.00150326	0.0129065	0.00722478	0.0264003	0.0190881	0.021326	0.0167824	0.00813893	0.0108572	0.0190655	0.0298218	0.0198266	0.0108456	0.031329	0.00722111	0.0195755	0.0130382	0.0132479	0.0161211	0.00951346
0.0317344	0.0272404	0.0293769	0.0297596	0.00135427	0.0257	0.00733783	0.018838	0.0263916	0.0345768	0.0163226	0.00334724	0.00992158	0.00970993	0.00549859	0.0144028	0.020001	0.032833	0.0181396	0.0235594	0.0146434	0.0121623	0.0138368	0.009559	0.015087	0.0152257	0.0109714	0.0197057	0.0215367	0.0140924	0.00134403	0.0130889	0.00684344	0.0256599	0.0187331	0.0215117	0.0168805	0.00842537	0.0103701	0.0184407	0.029955	0.0191973	0.0108701	0.0319175	0.00740015	0.019601	0.0130452	0.0132913	0.0163112	0.00989074
0.032249	0.0275151	0.0296088	0.0295082	0.00120569	0.0255534	0.0064471	0.0187853	0.0264323	0.0353509	0.0160308	0.00362861	0.0100705	0.0100434	0.0054441	0.014958	0.0198584	0.0330626	0.0179787	0.0234789	0.0143961	0.0121952	0.013974	0.00979804	0.0148357	0.0153914	0.00984422	0.0191699	0.0209798	0.0142584	0.00126371	0.0132632	0.00649146	0.0249201	0.0184403	0.0216785	0.0169665	0.00872188	0.00986927	0.0178102	0.0300582	0.0185504	0.01092	0.0324793	0.00758636	0.019595	0.0130495	0.0133376	0.0164883	0.0102994
0.0327313	0.0277946	0.0298217	0.0292275	0.00109196	0.0253759	0.00553411	0.0187115	0.0264693	0.0360951	0.0157992	0.00391638	0.0102031	0.0103811	0.0054129	0.0154928	0.0196859	0.0332554	0.0177952	0.0233571	0.014164	0.0122352	0.0141159	0.0100311	0.0145804	0.0155499	0.00873906	0.0186268	0.0204447	0.0144251	0.0012816	0.0134394	0.00618858	0.0241634	0.0181985	0.0218367	0.0170319	0.00904624	0.00935865	0.017165	0.0301352	0.0178914	0.0110034	0.0330144	0.00777485	0.0195769	0.0130687	0.013384	0.0166373	0.0107466
0.0331791	0.0280766	0.0300145	0.0289196	0.00101946	0.0251664	0.00459828	0.0186219	0.0265132	0.0368184	0.0156266	0.0042206	0.0103291	0.0107407	0.00541186	0.0160079	0.0194863	0.0334137	0.017587	0.0232176	0.013937	0.0122834	0.0142593	0.0102641	0.0143377	0.0157001	0.0076682	0.0180836	0.0199102	0.0145793	0.00138845	0.0136091	0.0059163	0.0234015	0.0180179	0.0219694	0.0170862	0.00937759	0.00883578	0.0165078	0.0301796	0.0172166	0.0111245	0.0335317	0.0079668	0.0195441	0.0130949	0.0134229	0.0167736	0.0112219
0.0335862	0.0283549	0.0301926	0.0285846	0.00101889	0.0249398	0.00364591	0.0185193	0.0265743	0.0375166	0.0154875	0.00453617	0.0104406	0.0111162	0.00542744	0.0164955	0.0192634	0.0335257	0.0173404	0.0230644	0.0137194	0.012341	0.014402	0.0104926	0.0140802	0.0158404	0.00665234	0.0175419	0.0193631	0.0147417	0.00155366	0.0137701	0.00566763	0.0226336	0.0178964	0.0220766	0.0171151	0.00972982	0.00830997	0.0158457	0.0301999	0.016533	0.0112728	0.034026	0.00816123	0.0194809	0.013124	0.0134654	0.0168858	0.0117282
0.0339574	0.02863	0.0303426	0.0282221	0.00109004	0.0246956	0.00270588	0.018392	0.0266134	0.0381863	0.0153914	0.00487112	0.0105396	0.0114938	0.00545778	0.0169336	0.0190163	0.0336017	0.0170733	0.0228896	0.0135219	0.0123988	0.0145478	0.0107152	0.0138198	0.0159688	0.00574596	0.0169978	0.0188427	0.0149063	0.00175868	0.0139241	0.00549069	0.0218493	0.0178422	0.0221667	0.017138	0.0100865	0.00778133	0.0151723	0.0301904	0.0158498	0.0114603	0.0344695	0.0083605	0.0194046	0.0131676	0.0135017	0.0169899	0.0122606
0.0342923	0.0288955	0.0304759	0.0278355	0.00121997	0.0244143	0.0018046	0.0182489	0.0266473	0.0388294	0.0153458	0.0052062	0.0106258	0.0118698	0.00549845	0.017361	0.0187553	0.0336345	0.0167755	0.022703	0.0133336	0.0124626	0.014696	0.0109299	0.0135569	0.016087	0.00500322	0.0164429	0.0183397	0.0150621	0.00198282	0.014071	0.00538836	0.0210655	0.0178326	0.0222335	0.0171533	0.0104511	0.00725089	0.0144987	0.0301544	0.0151658	0.0116761	0.0348862	0.0085647	0.0193029	0.0132082	0.0135336	0.0170736	0.0128183
0.0345885	0.0291407	0.0305946	0.0274161	0.00139333	0.0240946	0.00111505	0.0180962	0.0266963	0.0394481	0.0153467	0.00554387	0.0106966	0.0122573	0.00555122	0.0177703	0.0184756	0.0336243	0.0164533	0.0225039	0.0131664	0.0125346	0.0148499	0.0111416	0.0132927	0.0161918	0.00452152	0.0158881	0.0178449	0.0152225	0.00221394	0.0142155	0.00534185	0.0202752	0.0178649	0.0222771	0.0171499	0.0108248	0.00671589	0.0138193	0.0300933	0.0144753	0.011921	0.0352612	0.00879308	0.0191882	0.0132479	0.0135575	0.0171336	0.0133853
0.0348405	0.0293769	0.0306952	0.0269872	0.00159217	0.0237505	0.00118452	0.0179216	0.026746	0.0400375	0.0153941	0.00587543	0.0107548	0.012642	0.00561548	0.0181394	0.0181658	0.0335769	0.0161112	0.0222903	0.0129919	0.0126136	0.0150043	0.0113528	0.0130097	0.0162846	0.0043817	0.0153353	0.0173616	0.0153834	0.00244896	0.0143514	0.00536349	0.0194804	0.0179381	0.0223048	0.0171329	0.0111895	0.00619013	0.0131389	0.0300002	0.013782	0.0121899	0.0355897	0.0090372	0.0190512	0.0132913	0.0135727	0.0171671	0.0139572
0.0350643	0.0296088	0.0307622	0.0265563	0.00181581	0.0233902	0.00196066	0.0177323	0.0267916	0.0406086	0.0154779	0.00619784	0.0107991	0.0130301	0.00568572	0.0184862	0.0178281	0.0334876	0.0157358	0.0220624	0.0128295	0.0126922	0.0151669	0.0115562	0.0127195	0.0163708	0.00460795	0.0147919	0.0168768	0.0155405	0.00268975	0.0144737	0.00544308	0.0186843	0.0180511	0.0223099	0.0171003	0.0115471	0.00567106	0.0124514	0.0298806	0.0130843	0.0124756	0.0358902	0.00926621	0.0189053	0.0133376	0.0135797	0.0171855	0.0145473
0.0352483	0.0298217	0.030801	0.0260989	0.00205336	0.0230125	0.00293098	0.0175231	0.0268306	0.041149	0.0155899	0.00651225	0.0108364	0.0134261	0.00576242	0.0188071	0.01747	0.0333648	0.0153292	0.02182	0.0126915	0.0127812	0.015329	0.0117514	0.0124533	0.0164389	0.00516153	0.0142465	0.0164079	0.015698	0.00291226	0.0145974	0.00559325	0.0178893	0.0181978	0.022277	0.0170459	0.0119042	0.00516519	0.0117708	0.0297324	0.0123897	0.0127844	0.0361478	0.00950057	0.0187447	0.013384	0.013575	0.0171778	0.0151392
0.0354003	0.0300145	0.0308159	0.0256208	0.0023251	0.0226193	0.00396904	0.0172981	0.0268686	0.0416609	0.0157393	0.00681647	0.0108541	0.0138232	0.0058453	0.0191202	0.0170977	0.0331959	0.0148986	0.0215617	0.012579	0.0128682	0.01549	0.0119638	0.0121785	0.0164919	0.00595359	0.0136996	0.0159651	0.0158542	0.00312652	0.0147077	0.00581177	0.0170978	0.0183778	0.0222182	0.0169845	0.0122588	0.00468695	0.0110881	0.029562	0.0117003	0.0131115	0.0363643	0.00973749	0.0185959	0.0134229	0.0135624	0.0171471	0.015742
0.0355152	0.0301926	0.0308076	0.0251185	0.00259058	0.0222139	0.00504027	0.0170617	0.0268986	0.0421461	0.0159135	0.00711833	0.0108606	0.0142232	0.00592892	0.0194026	0.0167115	0.0329896	0.0144476	0.021289	0.0124973	0.0129532	0.0156617	0.0121782	0.0119053	0.0165202	0.00690003	0.0131662	0.0155449	0.0159966	0.0033346	0.0148157	0.00608254	0.0163156	0.0185845	0.0221332	0.016909	0.0126023	0.00424222	0.0104186	0.0293582	0.0110155	0.0134606	0.0365477	0.0099829	0.0184317	0.0134654	0.0135434	0.0170879	0.0163475
0.0355886	0.0303426	0.0307705	0.0245973	0.00281934	0.0217978	0.00613056	0.0168072	0.0269253	0.0425995	0.0161099	0.00742068	0.0108594	0.0146181	0.00600754	0.0196258	0.016307	0.0327433	0.0139619	0.0210128	0.0124161	0.0130489	0.0158321	0.0123665	0.01162	0.0165424	0.00794452	0.0126118	0.0151422	0.0161518	0.00353132	0.0149122	0.00639655	0.0155407	0.0188189	0.0220293	0.0168129	0.0129371	0.00384677	0.00976082	0.0291343	0.0103461	0.0138285	0.0366938	0.0102287	0.0181936	0.0135017	0.0135177	0.0170022	0.0169603
0.0356322	0.0304759	0.0307124	0.0240645	0.00306426	0.0213751	0.00722573	0.0165359	0.0269501	0.0430255	0.0163288	0.0077165	0.0108496	0.0150122	0.00608911	0.0198075	0.015892	0.032456	0.0134524	0.0207362	0.012345	0.0131403	0.0159952	0.0125612	0.0113243	0.0165589	0.00903578	0.0120693	0.0147623	0.0163074	0.00372107	0.0150006	0.00675098	0.0147639	0.0190652	0.0219109	0.016713	0.0132581	0.00352412	0.00911357	0.0288757	0.00969246	0.0142005	0.036803	0.010489	0.0179583	0.0135336	0.0134771	0.0169002	0.0175687
0.0356459	0.0305946	0.0306193	0.0235176	0.00331658	0.0209481	0.00833046	0.0162492	0.0269714	0.04344	0.0165652	0.00800027	0.0108257	0.0154063	0.00616936	0.0199648	0.0154552	0.0321379	0.0129292	0.0204545	0.0122836	0.0132396	0.0161628	0.0127526	0.0110185	0.0165542	0.0101497	0.0115416	0.0144095	0.0164513	0.00389735	0.0150782	0.00714467	0.0139905	0.0193216	0.0217641	0.0165954	0.0135745	0.00327864	0.00849667	0.0286078	0.00905217	0.0145926	0.0368752	0.0107526	0.0177175	0.0135575	0.0134283	0.0167755	0.0181721
0.035622	0.0306952	0.0304947	0.0229575	0.00356996	0.0205112	0.00944576	0.01595	0.0269897	0.0438227	0.0168139	0.00825744	0.0107943	0.0158009	0.00624393	0.0200912	0.0150006	0.0317822	0.012397	0.0201655	0.01223	0.0133486	0.0163286	0.0129393	0.0107052	0.0165491	0.0112719	0.0110238	0.0140669	0.0165872	0.0040653	0.0151454	0.00757226	0.0132288	0.0195896	0.0215939	0.0164631	0.0138772	0.00316775	0.00790681	0.0282678	0.00844149	0.0149894	0.0368983	0.0110178	0.0174752	0.0135727	0.0133666	0.0166216	0.0187776
0.0355436	0.0307622	0.0303515	0.0223865	0.00382782	0.0200698	0.0105624	0.0156323	0.0269999	0.0441584	0.0170656	0.00849537	0.0107513	0.0161902	0.00631066	0.0201913	0.014532	0.0313867	0.0118464	0.0198795	0.0121878	0.0134623	0.0164883	0.0131335	0.0103846	0.0165242	0.0124078	0.0105092	0.0137501	0.0167225	0.00421536	0.0152073	0.00802764	0.0124771	0.0198523	0.0214049	0.0163127	0.0141635	0.00318701	0.00735515	0.0278923	0.00786734	0.0153897	0.0368739	0.0112916	0.0172337	0.0135797	0.0132891	0.0164509	0.0193697
0.0354531	0.030801	0.0301819	0.0218082	0.00409169	0.0196273	0.0116882	0.0153063	0.0270025	0.0444593	0.0173232	0.00873493	0.0106984	0.016575	0.00636927	0.0202598	0.0140532	0.0309529	0.0112788	0.0195866	0.0121592	0.013583	0.0166538	0.0133172	0.0100474	0.0164913	0.0135413	0.00999085	0.0134548	0.0168603	0.00434991	0.0152524	0.00849896	0.0117369	0.0201174	0.0211952	0.0161509	0.0144454	0.0033336	0.00684771	0.0275196	0.00733128	0.0157925	0.0368126	0.0115647	0.0169925	0.013575	0.0132082	0.0162593	0.0199548
0.0353467	0.0308159	0.0299872	0.0212238	0.00435293	0.019185	0.0128145	0.0149682	0.0270082	0.0447213	0.0175867	0.00897074	0.0106334	0.0169489	0.00640998	0.0202895	0.0135694	0.0304856	0.0106947	0.0192944	0.0121392	0.0137082	0.0168123	0.0134971	0.00970151	0.0164437	0.0146656	0.00948599	0.0131788	0.0170156	0.00446385	0.0152892	0.00898509	0.0110114	0.0203791	0.0209604	0.0159786	0.0147056	0.00358847	0.00638521	0.0271217	0.00684334	0.0161926	0.0367219	0.0118398	0.0167421	0.0135624	0.013109	0.0160394	0.0205356
0.0352071	0.0308076	0.0297596	0.0206347	0.00460471	0.0187558	0.0139248	0.0146229	0.0270042	0.0449585	0.0178525	0.00919346	0.010557	0.0173187	0.00644119	0.0202872	0.013068	0.0299778	0.0100962	0.0189992	0.0121277	0.0138368	0.0169625	0.0136794	0.00937389	0.0163866	0.0157749	0.00898625	0.0129292	0.0171517	0.00457069	0.0153191	0.00948599	0.010305	0.0206365	0.0207042	0.0157936	0.0149448	0.00392719	0.00597956	0.0267062	0.00641206	0.0165913	0.0365953	0.0121177	0.016486	0.0135434	0.013	0.0157961	0.0211043
0.0350394	0.0307705	0.0295082	0.0200465	0.00485716	0.0183374	0.0150411	0.0142639	0.0269877	0.0451608	0.0181077	0.00939743	0.0104737	0.0176838	0.00646289	0.0202598	0.0125516	0.0294262	0.00949998	0.0187201	0.0121244	0.013974	0.0171113	0.0138592	0.00904235	0.0163178	0.0168624	0.00849061	0.012697	0.0172617	0.00466154	0.0153387	0.0099922	0.00961321	0.0208824	0.02042	0.0155888	0.0151739	0.00432988	0.00566412	0.0262677	0.00605538	0.0169855	0.0364206	0.0124003	0.0162341	0.0135177	0.0128797	0.0155246	0.021658
0.0348427	0.0307124	0.0292275	0.0194548	0.00510176	0.0179308	0.0161456	0.0138951	0.0269562	0.0453416	0.018364	0.00958289	0.0103829	0.0180447	0.0064697	0.0202036	0.0120256	0.0288465	0.00889851	0.0184564	0.0121226	0.0141159	0.0172537	0.0140409	0.00870842	0.0162357	0.0179389	0.00800863	0.0124856	0.0173738	0.00473958	0.0153457	0.0104962	0.00894089	0.021113	0.0201188	0.0153713	0.0153784	0.00478513	0.005449	0.0258099	0.0057865	0.017375	0.0362027	0.0126808	0.0159859	0.0134771	0.0127414	0.0152374	0.0222085
0.0346023	0.0306193	0.0289196	0.0188723	0.00534837	0.0175447	0.0172343	0.01352	0.0269186	0.0455139	0.0186017	0.0097587	0.0102837	0.0183989	0.00646179	0.0201163	0.0114964	0.0282455	0.00830181	0.018201	0.0121361	0.0142593	0.0173864	0.0142133	0.00836662	0.0161501	0.0189937	0.00753476	0.0122982	0.0174749	0.00481254	0.0153442	0.0110037	0.00829214	0.021326	0.0198083	0.0151406	0.0155657	0.00528081	0.00533857	0.0253209	0.00561088	0.0177621	0.035951	0.0129641	0.0157366	0.0134283	0.0125869	0.0149266	0.0227427
0.0343372	0.0304947	0.0285846	0.018301	0.00559211	0.017181	0.0183179	0.0131433	0.0268722	0.0456655	0.0188292	0.00992158	0.0101665	0.0187456	0.00643806	0.020001	0.0109618	0.0276124	0.00771295	0.0179509	0.0121623	0.014402	0.0175267	0.0143807	0.00801481	0.0160529	0.0200184	0.00706083	0.0121257	0.0175862	0.00486267	0.0153263	0.0115067	0.00767103	0.0215117	0.0194737	0.0148947	0.0157308	0.00579242	0.00532905	0.024815	0.00553423	0.0181421	0.0356571	0.0132421	0.0154941	0.0133666	0.01242	0.0146337	0.0232629
0.0340594	0.0303515	0.0282221	0.0177445	0.00582795	0.0168353	0.019388	0.0127654	0.0268291	0.0457762	0.0190486	0.0100705	0.0100393	0.0190795	0.00640361	0.0198584	0.0104269	0.0269489	0.00714045	0.0177201	0.0121952	0.0145478	0.0176605	0.0145515	0.0076605	0.0159572	0.0210182	0.00660369	0.0119722	0.0176788	0.00490346	0.0153042	0.0119994	0.00708045	0.0216785	0.0191224	0.0146418	0.0158704	0.00631715	0.00541496	0.0242813	0.00555791	0.0184992	0.0353306	0.0135235	0.0152591	0.0132891	0.012245	0.0143011	0.0237615
0.0337606	0.0301819	0.0278355	0.0172027	0.0060618	0.0165186	0.0204461	0.0123847	0.0267742	0.0458538	0.0192477	0.0102031	0.00990931	0.0194029	0.00635494	0.0196859	0.00988143	0.0262542	0.00660467	0.0175072	0.0122352	0.014696	0.0177782	0.0147178	0.0072971	0.0158386	0.0219953	0.00615164	0.0118365	0.0177614	0.00492888	0.0152659	0.0124924	0.00652282	0.0218367	0.0187558	0.0143738	0.0159885	0.00685342	0.00560559	0.023732	0.00567981	0.0188464	0.034973	0.0138031	0.0150268	0.0132082	0.0120644	0.0139222	0.024251
0.033439	0.0299872	0.0274161	0.0166842	0.00628097	0.0162274	0.0214866	0.012006	0.0267142	0.0459083	0.0194354	0.0103291	0.00976889	0.0197154	0.00628437	0.0194863	0.00932462	0.0255309	0.00611409	0.0173068	0.0122834	0.0148499	0.0178872	0.0148816	0.00693071	0.0157167	0.0229321	0.00570803	0.0117168	0.0178425	0.00494097	0.0152141	0.0129776	0.00601032	0.0219694	0.0183715	0.0141025	0.0160797	0.00739292	0.00588363	0.023161	0.00587171	0.0191898	0.034598	0.0140821	0.0147996	0.013109	0.0118804	0.0135305	0.0247185
0.0330959	0.0297596	0.0269872	0.0161937	0.00649551	0.0159781	0.0225178	0.0116236	0.0266556	0.0459427	0.0196162	0.0104406	0.0096187	0.0200201	0.00619831	0.0192634	0.00877064	0.0247821	0.00568599	0.0171307	0.012341	0.0150043	0.0179894	0.0150416	0.00656012	0.0155886	0.0238367	0.00527276	0.0116027	0.017914	0.00493729	0.0151505	0.0134604	0.00553869	0.0220766	0.0179709	0.0138234	0.0161478	0.00793041	0.00622395	0.022578	0.00614002	0.0195395	0.0341875	0.0143599	0.0145818	0.013	0.0116837	0.0131099	0.0251429
0.0327438	0.0295082	0.0265563	0.015726	0.0067073	0.0157756	0.0235251	0.0112494	0.026543	0.0459542	0.0197778	0.0105396	0.00946722	0.0203127	0.0060962	0.0190163	0.00821518	0.0240067	0.0053386	0.0169792	0.0123988	0.0151669	0.018074	0.0152006	0.00618777	0.0154497	0.024714	0.00485032	0.0115031	0.0179734	0.00491429	0.0150715	0.0139387	0.00513049	0.0221667	0.0175534	0.0135292	0.016197	0.00846777	0.00661598	0.0219715	0.0064743	0.0198693	0.0336993	0.0146442	0.0143826	0.0128797	0.0114731	0.0126745	0.0255538
0.0323694	0.0292275	0.0260989	0.0152926	0.00690637	0.0156127	0.0245085	0.0108839	0.0264183	0.0459418	0.019921	0.0106258	0.00929878	0.0205939	0.00597451	0.0187553	0.00767093	0.0231989	0.00509869	0.0168604	0.0124626	0.015329	0.018153	0.0153537	0.00581151	0.0153095	0.0255581	0.00444773	0.0114135	0.0180294	0.0048824	0.0149838	0.0144063	0.00479448	0.0222335	0.0171241	0.0132302	0.0162131	0.00899885	0.00705001	0.0213534	0.00685034	0.0201742	0.0331791	0.0149155	0.0141906	0.0127414	0.0112486	0.0122277	0.0259508
0.0319716	0.0289196	0.0256208	0.0148693	0.00711281	0.0154847	0.0254674	0.0105333	0.0262792	0.0459037	0.0200458	0.0106966	0.00912262	0.0208643	0.00583969	0.0184756	0.00712936	0.0223716	0.00498647	0.0167687	0.0125346	0.01549	0.0182216	0.0155058	0.00543233	0.0151596	0.0263805	0.0040638	0.0113331	0.0180636	0.0048408	0.0148845	0.0148712	0.00452776	0.0222771	0.0166935	0.0129215	0.0162176	0.00952819	0.00751244	0.0207253	0.00725745	0.0204611	0.0326323	0.015202	0.0140145	0.0125869	0.0110153	0.0117607	0.0263327
0.0315621	0.0285846	0.0251185	0.0144926	0.0073125	0.0153902	0.0264088	0.0101964	0.0261322	0.045841	0.0201514	0.0107548	0.00894025	0.0211218	0.00568518	0.0181658	0.00658479	0.0215243	0.00500797	0.0166998	0.0126136	0.0156617	0.0182712	0.015652	0.00505017	0.0150068	0.0271698	0.00369537	0.0112586	0.018094	0.00478589	0.0147696	0.015317	0.00434428	0.0223048	0.0162561	0.0126093	0.0161959	0.01005	0.00799754	0.0200818	0.00768705	0.0207297	0.0320614	0.0154703	0.0138538	0.01242	0.0107728	0.01127	0.026685
0.031152	0.0282221	0.0245973	0.0141658	0.00750247	0.0153418	0.0273203	0.0098816	0.0259797	0.045753	0.0202424	0.0107991	0.00875547	0.0213645	0.00551523	0.0178281	0.00603958	0.0206576	0.00516093	0.0166571	0.0126922	0.0158321	0.018313	0.0157977	0.00467554	0.0148623	0.0279163	0.00333541	0.0111839	0.0181134	0.00471694	0.014649	0.0157613	0.0042525	0.0223099	0.0158051	0.0122935	0.0161345	0.0105686	0.00849142	0.0194209	0.00813526	0.0209834	0.0314633	0.0156851	0.0137087	0.012245	0.0105235	0.0107777	0.0270077
0.0307374	0.0278355	0.0240645	0.0138814	0.00768679	0.0153319	0.0282014	0.0095948	0.0258092	0.0456439	0.0203105	0.0108364	0.00856403	0.0215887	0.00532447	0.01747	0.00548634	0.0197781	0.0054349	0.0166435	0.0127812	0.0159952	0.0183372	0.0159484	0.00429551	0.0147135	0.0286281	0.00299212	0.0111178	0.0181164	0.00463562	0.0145181	0.0161857	0.00424441	0.022277	0.0153525	0.0119715	0.0160512	0.0110672	0.00899276	0.0187566	0.00858815	0.021211	0.0308346	0.0159038	0.0135707	0.0120644	0.010254	0.010263	0.0273018
0.0303163	0.0274161	0.0235176	0.0136494	0.0078737	0.0153617	0.0290654	0.00935337	0.0256328	0.0455309	0.0203604	0.0108541	0.008366	0.0218057	0.00511808	0.0170977	0.00493508	0.0188796	0.00581886	0.0166598	0.0128682	0.0161628	0.018356	0.0161134	0.00392073	0.0145703	0.0293027	0.00266839	0.0110462	0.0181134	0.00454887	0.0143762	0.0165901	0.00431756	0.0222182	0.0149025	0.011643	0.015938	0.0115498	0.00949463	0.0180893	0.00904224	0.0214226	0.0301803	0.0161215	0.0134553	0.0118804	0.0099781	0.00973134	0.0275843
0.0298991	0.0269872	0.0229575	0.0134589	0.00805018	0.0154311	0.0298951	0.00914032	0.0254467	0.0453953	0.0203801	0.0108606	0.00816855	0.0219988	0.0048932	0.0167115	0.0043833	0.0179582	0.00628081	0.0167035	0.0129532	0.0163286	0.0183591	0.0162587	0.00355171	0.014418	0.029935	0.00236205	0.0109848	0.0180896	0.0044492	0.0142317	0.0169863	0.00445772	0.0221332	0.0144571	0.0113173	0.015799	0.0120217	0.00999622	0.0174103	0.00950061	0.0216152	0.0294926	0.0163329	0.0133349	0.0116837	0.00970475	0.00918981	0.0278562
0.0294842	0.0265563	0.0223865	0.0133267	0.00820239	0.0155164	0.0307023	0.0089522	0.0252475	0.0452387	0.0203804	0.0108594	0.0079638	0.0221783	0.00465974	0.016307	0.00383982	0.0170264	0.00681018	0.0167756	0.0130489	0.0164883	0.0183512	0.0163514	0.00319616	0.0142439	0.0305276	0.00207498	0.0109235	0.0180644	0.00433841	0.014062	0.0173616	0.00464663	0.0220293	0.0140046	0.0109912	0.0156445	0.012475	0.0104945	0.0167363	0.00995806	0.021791	0.0287847	0.0165346	0.0132363	0.0114731	0.00942019	0.00864333	0.0280848
0.0290731	0.0260989	0.0218082	0.0132435	0.00836064	0.0156287	0.0314764	0.00881291	0.0250262	0.045058	0.0203723	0.0108496	0.00775273	0.0223367	0.00440906	0.015892	0.00330421	0.016085	0.00739927	0.0168723	0.0131403	0.0166538	0.0183386	0.0164544	0.00285576	0.0140817	0.0310766	0.00181639	0.0108586	0.0180221	0.0042218	0.0138769	0.0177131	0.00488536	0.0219109	0.0135459	0.0106557	0.0154633	0.01291	0.0109785	0.0160593	0.0104029	0.0219444	0.0280546	0.0167399	0.013172	0.0112486	0.00912917	0.0080908	0.0282804
0.0286666	0.0256208	0.0212238	0.0132125	0.00850724	0.0157707	0.0322173	0.0087099	0.0247918	0.04486	0.0203653	0.0108257	0.0075369	0.0224937	0.0041406	0.0154552	0.00277739	0.015128	0.00801937	0.0169943	0.0132396	0.0168123	0.0182975	0.0165556	0.00254717	0.0139202	0.0315905	0.00157544	0.0107927	0.017968	0.00409737	0.0136844	0.0180545	0.00515155	0.0217641	0.0130935	0.0103169	0.015251	0.0133486	0.0114624	0.0153794	0.0108298	0.0220693	0.0272999	0.0169325	0.0131195	0.0110153	0.00882843	0.0075354	0.0284483
0.0282656	0.0251185	0.0206347	0.0132308	0.00865311	0.0159363	0.0329259	0.00865678	0.0245444	0.0446318	0.0203415	0.0107943	0.00732668	0.0226314	0.00386416	0.0150006	0.0022625	0.0141623	0.00866488	0.0171398	0.0133486	0.0169625	0.0182424	0.0166558	0.00227385	0.0137573	0.0320637	0.00134737	0.0107241	0.0178985	0.00397578	0.0134781	0.0183782	0.0054333	0.0215939	0.0126507	0.00998452	0.0150184	0.0137778	0.0119286	0.0146943	0.0112383	0.022181	0.0265264	0.0171164	0.0130794	0.0107728	0.00852294	0.00698103	0.0285897
0.0278782	0.0245973	0.0200465	0.013296	0.00880225	0.0161231	0.0335925	0.00865262	0.0242758	0.0443791	0.0202874	0.0107513	0.00711709	0.0227429	0.00357195	0.014532	0.0017533	0.013186	0.00932393	0.0172883	0.0134623	0.0171113	0.0181762	0.0167547	0.0020568	0.0135912	0.0325055	0.0011432	0.0106512	0.017826	0.00384511	0.0132662	0.0186803	0.0057357	0.0214049	0.012212	0.0096639	0.0147588	0.0141741	0.0123763	0.0140291	0.0116386	0.022266	0.0257377	0.0172839	0.0130541	0.0105235	0.00821147	0.00643244	0.0287009
0.0275018	0.0240645	0.0194548	0.0134078	0.00893787	0.0163204	0.0342329	0.0086933	0.0239872	0.04412	0.0202328	0.0106984	0.00691181	0.0228459	0.00327206	0.0140532	0.00125334	0.0122056	0.00998901	0.0174593	0.013583	0.0172537	0.0180923	0.0168406	0.00191444	0.0134265	0.0329107	0.000955424	0.0105688	0.017736	0.00371781	0.0130499	0.0189788	0.00604517	0.0211952	0.0117796	0.00933709	0.0144651	0.014543	0.0127947	0.0133936	0.0120175	0.0223238	0.0249273	0.017441	0.0130409	0.010254	0.0078944	0.00589914	0.0287817
0.0271511	0.0235176	0.0188723	0.0135659	0.00905928	0.0165407	0.0348303	0.00878133	0.023685	0.0438504	0.0201681	0.0106334	0.00671435	0.0229227	0.0029645	0.0135694	0.000764516	0.0112219	0.0106526	0.0176528	0.0137082	0.0173864	0.0179896	0.0169247	0.0018618	0.0132556	0.0332669	0.000786595	0.0104822	0.0176617	0.00359722	0.0128182	0.0192509	0.00635807	0.0209604	0.0113616	0.00902495	0.014151	0.0148932	0.0132024	0.0127687	0.0123756	0.0223598	0.0241051	0.0175915	0.0130382	0.0099781	0.00757402	0.00537676	0.0288397
0.0268222	0.0229575	0.018301	0.0137612	0.00917503	0.0167827	0.0354022	0.00891004	0.0233747	0.0435667	0.0200581	0.010557	0.00651821	0.0229888	0.00265692	0.013068	0.000289387	0.0102344	0.011315	0.017886	0.0138368	0.0175267	0.0178763	0.0169989	0.00191816	0.0130868	0.0335902	0.000642548	0.0103953	0.017551	0.00349272	0.0125732	0.0194918	0.00667438	0.0207042	0.0109603	0.00871654	0.0138092	0.0152225	0.0135944	0.0121564	0.0127182	0.0223703	0.0232585	0.017717	0.0130452	0.00970475	0.00724683	0.00488394	0.0288706
0.0265108	0.0223865	0.0177445	0.0139881	0.00928535	0.0170208	0.0359505	0.00907781	0.0230489	0.043258	0.0199266	0.0104737	0.00632471	0.0230342	0.00235319	0.0125516	0.000192178	0.00924322	0.0119688	0.0181225	0.013974	0.0176605	0.0177518	0.0170692	0.00207731	0.0129194	0.033878	0.000510697	0.0102986	0.0173887	0.00340227	0.0123175	0.0197165	0.00697691	0.02042	0.0105769	0.00841899	0.0134452	0.0155257	0.0139667	0.0115606	0.013034	0.022359	0.0224037	0.017832	0.0130495	0.00942019	0.00692858	0.00442055	0.0288669
0.0262212	0.0218082	0.0172027	0.0142439	0.00939139	0.017249	0.0364477	0.00928991	0.0227047	0.0429366	0.0197814	0.0103829	0.00613355	0.0230563	0.00205976	0.0120256	0.000637758	0.00825809	0.0126084	0.018362	0.0141159	0.0177782	0.0176076	0.0171327	0.00231273	0.0127503	0.0341295	0.00038888	0.0101947	0.0172387	0.00333198	0.0120569	0.0199208	0.0072768	0.0201188	0.0102115	0.00813334	0.0130712	0.0158078	0.0143139	0.0109984	0.013329	0.0223206	0.0215361	0.0179328	0.0130687	0.00912917	0.00660317	0.00399734	0.0288369
0.0259509	0.0212238	0.0166842	0.01452	0.00949712	0.0174744	0.0368952	0.00953502	0.0223524	0.042593	0.0196232	0.0102837	0.0059586	0.0230563	0.00179493	0.0114964	0.00107461	0.00727289	0.0132364	0.0186087	0.0142593	0.0178872	0.0174513	0.0171959	0.00259246	0.0125804	0.0343447	0.000300492	0.0100806	0.0170764	0.00327274	0.0117922	0.0201009	0.00756343	0.0198083	0.00985576	0.00786568	0.0126606	0.0160654	0.014637	0.0104711	0.0136057	0.0222608	0.0206529	0.0180174	0.0130949	0.00882843	0.0062741	0.00364664	0.02878
0.0257126	0.0206347	0.0161937	0.0148277	0.00958799	0.0176988	0.0373088	0.00980393	0.0219769	0.04223	0.0194611	0.0101665	0.00579896	0.0230404	0.00159152	0.0109618	0.00149592	0.00630069	0.0138425	0.0188628	0.014402	0.0179894	0.0172771	0.0172464	0.00291235	0.0124073	0.0345249	0.000247131	0.00996036	0.0169059	0.00324345	0.01152	0.0202555	0.00784311	0.0194737	0.00953258	0.00761675	0.0122251	0.0162975	0.0149389	0.00998026	0.0138494	0.0221695	0.0197662	0.0180922	0.013124	0.00852294	0.00594731	0.00340807	0.0286932
0.0255065	0.0200465	0.015726	0.0151471	0.00967827	0.0179139	0.0376836	0.0101008	0.021589	0.0418557	0.0192863	0.0100393	0.00565011	0.0230084	0.00146311	0.0104269	0.00190174	0.00533801	0.014433	0.0191253	0.0145478	0.018074	0.0170915	0.017281	0.00325846	0.0122296	0.0346593	0.000211699	0.00983951	0.0167248	0.00325968	0.0112458	0.0203836	0.0081142	0.0191224	0.00927392	0.00738802	0.0117841	0.0165063	0.0152141	0.00953957	0.0140773	0.0220594	0.0188701	0.0181435	0.0131676	0.00821147	0.00561756	0.00329026	0.0285756
0.025335	0.0194548	0.0152926	0.0154655	0.00975468	0.0181086	0.0380127	0.0104127	0.0211867	0.0414647	0.0191084	0.00990931	0.00552016	0.022959	0.00144674	0.00988143	0.00229144	0.00440207	0.0150115	0.0193905	0.014696	0.018153	0.0168892	0.017314	0.00362217	0.0120561	0.0347569	0.000180419	0.00971346	0.0165383	0.0033115	0.0109622	0.020492	0.00836675	0.0187558	0.00903228	0.00717447	0.0113283	0.0166838	0.0154417	0.00915368	0.0142877	0.0219193	0.0179645	0.0181773	0.0132082	0.0078944	0.00529127	0.00329652	0.0284227
0.0251984	0.0188723	0.0148693	0.0158026	0.00981641	0.0182972	0.0383101	0.0107373	0.0207845	0.0410614	0.0189243	0.00976889	0.00540713	0.0228855	0.00155494	0.00932462	0.00266432	0.0035007	0.0155693	0.0196586	0.0148499	0.0182216	0.0166698	0.0173388	0.00399949	0.0118934	0.0348231	0.000170771	0.00958234	0.0163401	0.00341603	0.0106636	0.0205718	0.00861262	0.0183715	0.00882235	0.00697884	0.0108572	0.0168367	0.0156485	0.00882883	0.0144639	0.0217732	0.0170624	0.0182154	0.0132479	0.00757402	0.00496992	0.00343944	0.0282432
0.0250923	0.018301	0.0144926	0.0161438	0.00987661	0.0184691	0.0385619	0.0110753	0.0203619	0.040644	0.0187331	0.0096187	0.00531694	0.0227924	0.00176647	0.00877064	0.00302938	0.00265485	0.0160976	0.0199228	0.0150043	0.0182712	0.016434	0.0173564	0.00438522	0.0117303	0.0348543	0.000142121	0.00943861	0.016135	0.00356145	0.010365	0.0206327	0.0088422	0.0179709	0.00864722	0.00680522	0.0103701	0.016966	0.0158341	0.00856509	0.0146234	0.0216253	0.0161568	0.0182267	0.0132913	0.00724683	0.00465938	0.00368981	0.028031
0.0250094	0.0177445	0.0141658	0.0164916	0.00992884	0.0186229	0.0387681	0.011426	0.0199117	0.040211	0.0185376	0.00946722	0.00524348	0.0226779	0.00206226	0.00821518	0.00337193	0.00194083	0.0165948	0.0201851	0.0151669	0.018313	0.016187	0.0173679	0.00477461	0.0115637	0.0348388	9.04948e-05	0.00929425	0.0159154	0.00374794	0.0100593	0.0206689	0.00905902	0.0175534	0.00850863	0.00665409	0.00986927	0.017067	0.0159854	0.00837234	0.0147535	0.021403	0.0152178	0.0182149	0.0133376	0.00692858	0.0043523	0.00403611	0.0277978
0.0249688	0.0172027	0.0138814	0.0168428	0.00998407	0.0187514	0.0389369	0.0117781	0.0194644	0.039773	0.0183364	0.00929878	0.00519016	0.0225457	0.00241708	0.00767093	0.00369259	0.00150163	0.0170707	0.0204357	0.015329	0.0183372	0.0159315	0.0173631	0.0051645	0.0113908	0.0347773	4.02186e-05	0.00914521	0.0156842	0.00397116	0.00974498	0.02068	0.00926668	0.0171241	0.00841012	0.00652778	0.00935865	0.0171348	0.0161191	0.00824796	0.0148517	0.0211498	0.0142917	0.0181855	0.013384	0.00660317	0.00405963	0.00445765	0.0275351
0.0249584	0.0166842	0.0136494	0.0171901	0.0100298	0.0188549	0.0390723	0.0121307	0.0190086	0.0393338	0.0181365	0.00912262	0.00515973	0.0223989	0.00280343	0.00712936	0.00399788	0.00156453	0.0175266	0.0206927	0.01549	0.018356	0.0156573	0.0173559	0.00555509	0.0112168	0.0346835	7.89457e-05	0.00898983	0.0154414	0.00422916	0.00942752	0.0206651	0.00946738	0.0166935	0.00835999	0.00643214	0.00883578	0.0171744	0.0162226	0.00819664	0.0149253	0.0208784	0.0133739	0.0181451	0.0134229	0.0062741	0.00378469	0.00492666	0.0272433
0.0249783	0.0161937	0.0134589	0.017571	0.0100612	0.0189335	0.0391654	0.0124851	0.0185487	0.0388815	0.0179315	0.00894025	0.00515006	0.0222234	0.00321568	0.00658479	0.00428558	0.00210448	0.01795	0.0209404	0.0156617	0.0183591	0.0153724	0.0173401	0.00595437	0.0110387	0.0345547	0.000167558	0.00883662	0.0151918	0.00451944	0.00910694	0.0206304	0.00966831	0.0162561	0.0083527	0.00640039	0.00830997	0.017185	0.0163116	0.00821185	0.0149731	0.0205782	0.0124523	0.0180797	0.0134654	0.00594731	0.00353143	0.00543574	0.0269247
0.0250382	0.015726	0.0133267	0.0179247	0.010094	0.0189857	0.0392208	0.0128349	0.0180754	0.0384105	0.0177222	0.00875547	0.00516654	0.0220222	0.00364939	0.00603958	0.00455302	0.00281321	0.0183463	0.021179	0.0158321	0.0183512	0.0150809	0.017317	0.00635112	0.0108678	0.0343967	0.000278215	0.00867858	0.0149395	0.0048417	0.00877999	0.0205735	0.00985566	0.0158051	0.00837963	0.00637965	0.00778133	0.017168	0.0163796	0.00828767	0.0149924	0.0202606	0.0115413	0.0179885	0.0135017	0.00561756	0.00330497	0.0059644	0.0265753
0.0251278	0.0152926	0.0132435	0.0182426	0.0101224	0.0190085	0.039235	0.0131806	0.0175953	0.037922	0.017523	0.00856403	0.00520095	0.0217959	0.0040989	0.00548634	0.00480377	0.00359703	0.0187206	0.0214093	0.0159952	0.0183386	0.0147798	0.0172751	0.00674251	0.0106973	0.0342063	0.000397763	0.00851805	0.0146749	0.00518554	0.008447	0.0205052	0.010026	0.0153525	0.00843577	0.00638638	0.00725089	0.0171311	0.0163985	0.00842155	0.0149896	0.0199181	0.0106241	0.0178951	0.0135336	0.00529127	0.0031185	0.00651333	0.0261952
0.0252483	0.0148693	0.0132125	0.0185479	0.0101406	0.0190008	0.0392058	0.0135347	0.01711	0.0374169	0.0173135	0.008366	0.005251	0.0215548	0.00455249	0.00493508	0.00504003	0.0043997	0.0190711	0.0216278	0.0161628	0.0182975	0.0144721	0.0172359	0.00712692	0.0105387	0.033982	0.000534447	0.00835995	0.0143986	0.00555538	0.0081127	0.020415	0.0102044	0.0149025	0.0085234	0.00642308	0.00671589	0.0170597	0.0163632	0.00860756	0.0149664	0.019555	0.00971593	0.0177945	0.0135575	0.00496992	0.00297065	0.00706981	0.0258147
0.0254014	0.0144926	0.0132308	0.0188327	0.0101496	0.0189637	0.0391405	0.0139015	0.0166146	0.0369102	0.0171066	0.00816855	0.00531918	0.0213045	0.00501752	0.0043833	0.00525905	0.00519399	0.019383	0.0218243	0.0163286	0.0182424	0.014155	0.0171912	0.00750598	0.0103414	0.0337221	0.000692932	0.00820296	0.0141128	0.0059441	0.00778167	0.020279	0.0103764	0.0144571	0.0086502	0.00648836	0.00619013	0.0169567	0.0163077	0.00882647	0.0149031	0.019166	0.00881365	0.0176822	0.0135727	0.00465938	0.00286931	0.00762796	0.0254258
0.0255755	0.0141658	0.013296	0.0191094	0.0101478	0.0188913	0.0390422	0.0142238	0.0161121	0.0363929	0.0169022	0.0079638	0.00540052	0.0210356	0.00548409	0.00383982	0.00546996	0.00597834	0.0196546	0.0220202	0.0164883	0.0181762	0.0138266	0.017114	0.00788346	0.0101143	0.0334451	0.000869205	0.00805907	0.0138173	0.00635051	0.00745405	0.0201263	0.0105431	0.0140046	0.00880335	0.00658054	0.00567106	0.0168408	0.0162264	0.00908018	0.0148196	0.0187542	0.00791944	0.0175432	0.0135797	0.0043523	0.00283015	0.00817942	0.0249645
0.0257522	0.0138814	0.0134078	0.0193712	0.0101405	0.0187825	0.0389014	0.0145188	0.0156092	0.0358774	0.0167008	0.00775273	0.00549289	0.0207355	0.00594869	0.00330421	0.00566384	0.0067453	0.0198916	0.0221943	0.0166538	0.0180923	0.0134915	0.0170439	0.00824729	0.00991199	0.0331465	0.00106489	0.00792332	0.0135128	0.00677852	0.00712466	0.0199525	0.0107101	0.0135459	0.00897655	0.00669891	0.00516519	0.0166927	0.0161386	0.00936173	0.014716	0.0183203	0.00703475	0.0173894	0.013575	0.00405963	0.00285446	0.00872749	0.0244674
0.0259645	0.0136494	0.0135659	0.019617	0.010132	0.0186396	0.0387132	0.0148085	0.0151035	0.0353654	0.0164995	0.0075369	0.0055969	0.0204358	0.00640952	0.00277739	0.005854	0.00749392	0.0200944	0.0223533	0.0168123	0.0179896	0.0131533	0.0169728	0.00861308	0.00970827	0.0328038	0.00127794	0.00779131	0.0132043	0.00722058	0.00679354	0.0197533	0.0108774	0.0130935	0.0091722	0.00683836	0.00468695	0.0165436	0.0160081	0.00966404	0.014584	0.017868	0.00614746	0.0172228	0.0135624	0.00378469	0.00293984	0.00927332	0.0239529
0.0262049	0.0134589	0.0137612	0.0198441	0.010116	0.0184606	0.0384983	0.0150836	0.0145985	0.0348408	0.0162945	0.00732668	0.00570952	0.0200922	0.00687305	0.0022625	0.00602888	0.00822365	0.0202763	0.0224908	0.0169625	0.0178763	0.0128085	0.0168997	0.00897605	0.00950477	0.0324437	0.00149908	0.00766699	0.012881	0.00767264	0.00647313	0.019537	0.0110414	0.0126507	0.00938307	0.0069925	0.00424222	0.0163734	0.0158491	0.00997882	0.0144283	0.0173953	0.00528221	0.0170396	0.0135434	0.00353143	0.0030796	0.00980685	0.0234142
0.0264601	0.0133267	0.0139881	0.0200521	0.0100905	0.0182446	0.0382598	0.0153476	0.0140926	0.0343181	0.0161067	0.00711709	0.00583328	0.0196889	0.00734247	0.0017533	0.0062007	0.00892381	0.0204228	0.0226132	0.0171113	0.0177518	0.0124533	0.016812	0.00932641	0.00929706	0.0320708	0.00173335	0.00755368	0.0125558	0.00814359	0.00615081	0.0192969	0.0112097	0.012212	0.0095904	0.00716678	0.00384677	0.0161221	0.0156758	0.0103003	0.0142475	0.0169014	0.00441962	0.0168385	0.0135177	0.00330497	0.00327169	0.0103391	0.0228646
0.0267119	0.0132435	0.0142439	0.020236	0.0100631	0.0179913	0.0379935	0.0155784	0.0135865	0.0337991	0.0159264	0.00691181	0.00596517	0.0192942	0.00781593	0.00125334	0.00636405	0.00959758	0.020535	0.0227188	0.0172537	0.0176076	0.0121059	0.0167158	0.00967115	0.00908465	0.0316696	0.00197685	0.00745886	0.0122223	0.00863162	0.00583434	0.0190312	0.0113753	0.0117796	0.00981398	0.00735278	0.00352412	0.015858	0.0154793	0.0106244	0.0140456	0.0163842	0.00357089	0.0166102	0.0134771	0.0031185	0.00350399	0.0108541	0.0222947
0.0269701	0.0132125	0.01452	0.0204001	0.0100405	0.0177265	0.0376979	0.0158033	0.0130828	0.0332651	0.0157715	0.00671435	0.00610283	0.0188843	0.00828681	0.000764516	0.00651052	0.0102443	0.0206246	0.0228215	0.0173864	0.0174513	0.0117594	0.0166123	0.010008	0.00886753	0.0312363	0.00223834	0.00737637	0.011888	0.00912295	0.00553598	0.0187488	0.0115425	0.0113616	0.0100413	0.00754311	0.00327864	0.015574	0.0152496	0.0109473	0.0138244	0.0158458	0.00274341	0.0163607	0.0134283	0.00297065	0.00376734	0.0113606	0.0216959
0.0272404	0.0132308	0.0148277	0.0205449	0.0100159	0.0174229	0.0373659	0.0160146	0.0125785	0.0327082	0.0155848	0.00651821	0.00624452	0.0184551	0.00875227	0.000289387	0.00667347	0.0108605	0.0206809	0.0229083	0.0175267	0.0172771	0.0114086	0.016499	0.0103361	0.00864721	0.0307927	0.00251065	0.00731199	0.0115445	0.00962905	0.0052476	0.0184444	0.0117252	0.0109603	0.010274	0.00775078	0.00316775	0.0152777	0.0149933	0.0112634	0.0135797	0.0152971	0.00193236	0.0161012	0.0133666	0.00286931	0.00405593	0.0118604	0.0210853
0.0275151	0.013296	0.0151471	0.0206643	0.0099771	0.017045	0.0369934	0.0162013	0.0120802	0.0321458	0.015379	0.00632471	0.00638675	0.0180138	0.00921249	0.000192178	0.00682335	0.0114505	0.0207059	0.0229215	0.0176605	0.0170915	0.0110694	0.0163773	0.0106603	0.00842321	0.0303417	0.00279648	0.00727059	0.0111734	0.0101372	0.00498515	0.0181154	0.0119158	0.0105769	0.0105073	0.00796176	0.00318701	0.0149544	0.014715	0.0115674	0.0133197	0.0147285	0.00115233	0.0158225	0.0132891	0.00283015	0.00436777	0.0123395	0.0204542
0.0277946	0.0134078	0.0154655	0.0207569	0.00994223	0.0166348	0.0365857	0.0163663	0.0115909	0.0315754	0.0152041	0.00613355	0.00653189	0.0175542	0.00966632	0.000637758	0.00696077	0.012009	0.0206909	0.0229247	0.0177782	0.0168892	0.0107267	0.0162417	0.0109818	0.008189	0.029882	0.0030994	0.0072575	0.0108073	0.0106492	0.00473112	0.0177661	0.0121334	0.0102115	0.0107383	0.00817578	0.0033336	0.0146081	0.0144081	0.0118607	0.013047	0.01414	0.000435639	0.0155285	0.0132082	0.00285446	0.00469344	0.012805	0.0198074
0.0280766	0.0135659	0.0158026	0.0208269	0.00990936	0.0161846	0.0361495	0.0165115	0.011111	0.0310422	0.0150319	0.0059586	0.0066763	0.0170715	0.0101157	0.00107461	0.00710115	0.0125295	0.0206346	0.0229098	0.0178872	0.0166698	0.0103908	0.0161024	0.0112931	0.00794658	0.02942	0.00340714	0.00728642	0.0104435	0.011167	0.00450405	0.0174001	0.0123713	0.00985576	0.0109516	0.00838187	0.00358847	0.0142546	0.014089	0.0121448	0.0127556	0.0135437	0.000503088	0.0152232	0.013109	0.00293984	0.00503351	0.0132566	0.0191438
0.0283549	0.0137612	0.0161438	0.0208741	0.0098627	0.0157097	0.0356871	0.0166442	0.0106328	0.0305301	0.0148715	0.00579896	0.00682393	0.0165726	0.0105588	0.00149592	0.00724381	0.013015	0.0205506	0.0228882	0.0179894	0.016434	0.0100651	0.0159477	0.0115896	0.00770229	0.0289455	0.00372922	0.00733867	0.0100849	0.0116835	0.00431747	0.0170107	0.0125996	0.00953258	0.0112157	0.00858473	0.00392719	0.0138719	0.0137375	0.0124082	0.0124691	0.0129274	0.00119349	0.0148991	0.013	0.0030796	0.00538825	0.0136968	0.0184665
0.02863	0.0139881	0.0164916	0.0209013	0.00981993	0.0151993	0.0352014	0.0167514	0.0101666	0.0300036	0.014714	0.00565011	0.00697645	0.0160553	0.0109924	0.00190174	0.00739175	0.0134749	0.0204358	0.0228514	0.018074	0.016187	0.00974345	0.0157877	0.0118766	0.00744569	0.0284718	0.00406092	0.00741736	0.00971288	0.0122125	0.00416342	0.0165987	0.0128245	0.00927392	0.0114672	0.00879002	0.00432988	0.0134797	0.0133719	0.0126535	0.0121606	0.0123022	0.00190076	0.0145574	0.0128797	0.00327169	0.00574902	0.0141148	0.017781
0.0288955	0.0142439	0.0168428	0.0209024	0.00977438	0.0146554	0.0346957	0.0168357	0.00971187	0.0294758	0.0145643	0.00552016	0.00712129	0.0155172	0.0114131	0.00229144	0.00754541	0.0138997	0.0203013	0.0227914	0.018153	0.0159315	0.00944854	0.0156183	0.0121574	0.00718774	0.0279781	0.00438986	0.00753071	0.00933284	0.0127358	0.00403726	0.016164	0.0130639	0.00903228	0.0116834	0.0089821	0.00478513	0.013078	0.0129795	0.0128798	0.0118233	0.0116688	0.00259447	0.0142013	0.0127414	0.00350399	0.00611874	0.0145076	0.0170799
0.0291407	0.01452	0.0171901	0.0208782	0.00972375	0.0140732	0.0341665	0.016897	0.00928256	0.0289469	0.0144091	0.00540713	0.00726866	0.0149715	0.0118289	0.00266432	0.00770226	0.014288	0.0201354	0.0227038	0.0182216	0.0156573	0.00918821	0.0154451	0.0124306	0.00692183	0.0274777	0.00471943	0.0076627	0.00895439	0.0132599	0.00395424	0.0157153	0.0133189	0.00882235	0.0118975	0.00917852	0.00528081	0.0126486	0.0125627	0.0130818	0.0114847	0.0110393	0.00326528	0.0138276	0.0125869	0.00376734	0.00649616	0.0148888	0.0163708
0.0293769	0.0148277	0.017571	0.0208238	0.00967273	0.0134509	0.0336286	0.0169282	0.00886091	0.0284237	0.0142528	0.00531694	0.00741545	0.0144113	0.012235	0.00302938	0.00786038	0.0146356	0.0199335	0.0225959	0.0182712	0.0153724	0.0089304	0.0152643	0.0126933	0.0066476	0.0269887	0.00505119	0.00782398	0.00856374	0.0137881	0.00391717	0.0152456	0.0135895	0.00864722	0.0120911	0.00936728	0.00579242	0.0121959	0.0121261	0.0132632	0.0111504	0.0104032	0.00391364	0.0134357	0.01242	0.00405593	0.00688395	0.0152478	0.0156551
0.0296088	0.0151471	0.0179247	0.020741	0.00962375	0.012801	0.0330692	0.0169423	0.00844797	0.0279019	0.0141024	0.00524348	0.0075635	0.0138327	0.0126357	0.00337193	0.00802721	0.0149566	0.0196984	0.0224646	0.018313	0.0150809	0.00867896	0.0150752	0.0129471	0.00636066	0.0265103	0.00539178	0.00800755	0.00817159	0.0143086	0.00392204	0.0147586	0.0138729	0.00850863	0.0122863	0.00954884	0.00631715	0.0117419	0.0116748	0.0134208	0.01082	0.00973843	0.00453538	0.0130316	0.012245	0.00436777	0.00727218	0.015581	0.0149279
0.0298217	0.0154655	0.0182426	0.0206335	0.00957407	0.0121138	0.0324879	0.0169369	0.00806491	0.0273876	0.0139515	0.00519016	0.00771145	0.0132343	0.0130223	0.00369259	0.00820863	0.0152521	0.0194261	0.0223106	0.0183372	0.0147798	0.00846515	0.0148787	0.0131926	0.00606902	0.0260419	0.00574399	0.00821987	0.00776923	0.0148255	0.00398288	0.014253	0.0141669	0.00841012	0.012464	0.00971815	0.00685342	0.0112679	0.0112052	0.0135493	0.0104965	0.0090729	0.00513367	0.0126074	0.0120644	0.00469344	0.00765412	0.0158941	0.0141946
0.0300145	0.0158026	0.0185479	0.0205096	0.00952526	0.011392	0.0319086	0.0169105	0.00770545	0.0268798	0.0138011	0.00515973	0.00785858	0.0126307	0.0133932	0.00399788	0.00839485	0.0155325	0.0191216	0.0221346	0.018356	0.0144721	0.00827441	0.0146746	0.0134325	0.00578215	0.0255804	0.00610544	0.00845667	0.00736619	0.0153465	0.00408569	0.0137253	0.0144716	0.00835999	0.0126344	0.00990233	0.00739292	0.0107876	0.0107242	0.0136524	0.0101871	0.00841619	0.00570402	0.0121652	0.0118804	0.00503351	0.00804685	0.0161852	0.0134698
0.0301926	0.0161438	0.0188327	0.0203727	0.00947629	0.0106373	0.0313244	0.0168574	0.00736499	0.026383	0.0136534	0.00515006	0.00801068	0.0120155	0.0137551	0.00428558	0.00858909	0.0157726	0.0187881	0.0219328	0.0183591	0.014155	0.00811654	0.0144625	0.0136607	0.00547831	0.0251335	0.00646556	0.00871591	0.00696487	0.0158585	0.0042342	0.0131854	0.014776	0.0083527	0.0127929	0.0100475	0.00793041	0.0102935	0.0102231	0.0137312	0.00989667	0.00776842	0.00624637	0.0117134	0.0116837	0.00538825	0.00843484	0.0164557	0.0127311
0.0303426	0.0164916	0.0191094	0.0201906	0.00942652	0.00985992	0.0307299	0.0167835	0.00704418	0.0258981	0.0135004	0.00516654	0.00815701	0.011395	0.0141038	0.00455302	0.00879252	0.0159374	0.0184357	0.0217104	0.0183512	0.0138266	0.00798665	0.0142395	0.0138837	0.00516932	0.0247011	0.00682442	0.00899483	0.00656288	0.0163683	0.00442754	0.012621	0.0150985	0.00837963	0.0129433	0.0101456	0.00846777	0.00978158	0.00970898	0.0137792	0.00963261	0.00713711	0.00675721	0.0112486	0.0114731	0.00574902	0.00882716	0.0167033	0.0120117
0.0304759	0.0168428	0.0193712	0.0199799	0.00938694	0.00904395	0.0301283	0.0166911	0.00675235	0.0254223	0.0133357	0.00520095	0.0082981	0.0107708	0.0144344	0.00480377	0.00899925	0.0160664	0.0180432	0.0214659	0.0183386	0.0134915	0.00789222	0.0140121	0.0140952	0.00484953	0.0242883	0.00718447	0.00928034	0.00615831	0.016869	0.0046446	0.0120416	0.0154183	0.00843577	0.0130865	0.0102465	0.00899885	0.00926391	0.00918571	0.0137998	0.00939706	0.00651422	0.00723858	0.0107767	0.0112486	0.00611874	0.00921665	0.0169274	0.0112953
0.0305946	0.0171901	0.019617	0.0197561	0.0093503	0.00820283	0.0295205	0.0165847	0.00648383	0.0249571	0.0131726	0.005251	0.0084401	0.0101364	0.0147503	0.00504003	0.0092122	0.0161667	0.017621	0.0212104	0.0182975	0.0131533	0.00783457	0.0137759	0.0142907	0.00453141	0.023887	0.00754202	0.00958646	0.00575713	0.0173851	0.00488479	0.0114479	0.0157511	0.0085234	0.0132228	0.0103408	0.00952819	0.008735	0.00865536	0.0137963	0.00920508	0.0059105	0.00769564	0.010294	0.0110153	0.00649616	0.00960555	0.0171275	0.010593
0.0306952	0.017571	0.0198441	0.019514	0.00932692	0.00733783	0.028908	0.0164632	0.00624049	0.0245056	0.0130008	0.00531918	0.00859256	0.00949213	0.0150562	0.00525905	0.00943271	0.0162304	0.0171752	0.0209359	0.0182424	0.0128085	0.00781522	0.0135363	0.0144854	0.0041916	0.0235101	0.00791046	0.00990068	0.00535674	0.0178985	0.00514813	0.0108405	0.0161114	0.0086502	0.013339	0.0104293	0.01005	0.00819084	0.00811453	0.0137646	0.0090574	0.00533749	0.00811842	0.00979255	0.0107728	0.00688395	0.00999308	0.0173053	0.00990252
0.0307622	0.0179247	0.0200521	0.0192514	0.00929516	0.0064471	0.0282961	0.0162955	0.00601756	0.0240606	0.0128227	0.00540052	0.00874849	0.00884299	0.0153467	0.00546996	0.00965734	0.0162702	0.0167008	0.0206454	0.0181762	0.0124533	0.00782871	0.0132839	0.0146761	0.00383865	0.0231643	0.008279	0.0102221	0.00495392	0.0183782	0.00543642	0.0102169	0.0164661	0.00880335	0.0134478	0.0105001	0.0105686	0.00764462	0.00756732	0.0137007	0.00895543	0.00480183	0.00851215	0.00927257	0.0105235	0.00727218	0.0103752	0.0174584	0.00921224
0.030801	0.0182426	0.020236	0.0189606	0.00926131	0.00553411	0.027682	0.0161045	0.00583722	0.0236261	0.0126361	0.00549289	0.00890544	0.00819274	0.0156161	0.00566384	0.0098861	0.0162819	0.0162021	0.0203374	0.0180923	0.0121059	0.00787304	0.0130302	0.0148595	0.00350678	0.0228565	0.00864123	0.0105379	0.00455269	0.0188625	0.00573183	0.00957699	0.0168195	0.00897655	0.0135463	0.0105562	0.0110672	0.0070938	0.00701667	0.0136024	0.00890806	0.00433479	0.00887752	0.00874197	0.010254	0.00765412	0.0107567	0.017585	0.00856032
0.0308159	0.0185479	0.0204001	0.0186523	0.00923633	0.00459828	0.027069	0.0158948	0.00568527	0.023199	0.0124429	0.0055969	0.00906464	0.00754513	0.0158684	0.005854	0.0101251	0.016268	0.0156564	0.0200135	0.0179896	0.0117594	0.00795709	0.0127613	0.0150294	0.0031772	0.0225769	0.00900732	0.010862	0.00415462	0.0193314	0.00604531	0.00892465	0.0171669	0.0091722	0.0136363	0.0105967	0.0115498	0.00655012	0.00645981	0.0134788	0.00892243	0.0039392	0.0092158	0.00821165	0.0099781	0.00804685	0.0111334	0.0176913	0.0079534
0.0308076	0.0188327	0.0205449	0.0183174	0.00921015	0.00364591	0.0264686	0.015674	0.00555517	0.0227841	0.0122349	0.00570952	0.00923089	0.00688601	0.0161026	0.00602888	0.0103618	0.0162129	0.0150819	0.0196612	0.0178763	0.0114086	0.00806661	0.0124907	0.0151926	0.00285325	0.0223231	0.00937777	0.0111988	0.00376547	0.0197895	0.00636135	0.00826144	0.0175214	0.00938307	0.0137144	0.0106225	0.0120217	0.00598758	0.00591109	0.013329	0.00899057	0.00364546	0.00952032	0.00768158	0.00970475	0.00843484	0.0115116	0.017768	0.00740097
0.0307705	0.0191094	0.0206643	0.0179664	0.00919476	0.00270588	0.0258767	0.0154395	0.00545548	0.0223858	0.0120216	0.00583328	0.00939167	0.00621061	0.0163193	0.0062007	0.0106063	0.0161306	0.0144929	0.0193065	0.0177518	0.0110694	0.00821385	0.0122189	0.015339	0.00252477	0.0221075	0.00974123	0.0115361	0.00338624	0.0202391	0.00668252	0.00758295	0.0178752	0.0095904	0.0137852	0.0106358	0.012475	0.00539199	0.00536886	0.0131471	0.00911359	0.0034847	0.00978962	0.00714948	0.00942019	0.00882716	0.0118774	0.0178119	0.00689702
0.0307124	0.0193712	0.0207569	0.0176006	0.00917646	0.0018046	0.0252961	0.0151831	0.00538196	0.0219985	0.0117991	0.00596517	0.00956215	0.00555273	0.0165215	0.00636405	0.0108607	0.0160186	0.0138837	0.0189258	0.0176076	0.0107267	0.00838477	0.0119371	0.0154723	0.0021955	0.0219211	0.0101001	0.0118695	0.00301778	0.020682	0.00700507	0.00689238	0.0182322	0.00981398	0.0138432	0.0106282	0.01291	0.00480746	0.00483777	0.0129424	0.00931105	0.00346662	0.0100255	0.00661438	0.00912917	0.00921665	0.0122363	0.0178387	0.00645843
0.0306193	0.019617	0.0208269	0.0172173	0.0091644	0.00111505	0.0247211	0.0149081	0.00533004	0.0216238	0.0115686	0.00610283	0.00973847	0.00489755	0.0167029	0.00651052	0.0111276	0.0158688	0.0132536	0.0185477	0.0174513	0.0103908	0.00858196	0.0116544	0.0156004	0.00187975	0.0217675	0.0104566	0.0121968	0.00265923	0.0211126	0.00732484	0.00619278	0.0185786	0.0100413	0.0138962	0.0106047	0.0133486	0.00422689	0.00432324	0.0127079	0.00956524	0.00359294	0.0102279	0.00608083	0.00882843	0.00960555	0.0125941	0.0178385	0.00609048
0.0304947	0.0198441	0.0208741	0.0168113	0.00915594	0.00118452	0.0241665	0.0146142	0.00529244	0.0212605	0.0113225	0.00624452	0.00991173	0.00424752	0.0168692	0.00667347	0.01139	0.0156988	0.0126021	0.0181401	0.0172771	0.0100651	0.00879792	0.0113617	0.0157232	0.00158945	0.0216364	0.0108136	0.0125208	0.0023189	0.0215344	0.00764452	0.00548893	0.0189154	0.010274	0.0139383	0.0105675	0.0137778	0.00364337	0.00383838	0.0124433	0.00986543	0.00384328	0.0103933	0.0055501	0.00852294	0.00999308	0.0129351	0.0178098	0.00581525
0.0303515	0.0200521	0.0209013	0.0163785	0.00915152	0.00196066	0.0236417	0.014301	0.00527489	0.0209078	0.0110575	0.00638675	0.010095	0.00359739	0.0170145	0.00682335	0.0116373	0.0154999	0.0119407	0.0177101	0.0170915	0.00974345	0.00903856	0.0110702	0.0158388	0.00135299	0.021545	0.0111625	0.0128291	0.00201403	0.0219358	0.00796314	0.00477109	0.0192575	0.0105073	0.0139683	0.0105108	0.0141741	0.00306777	0.00340342	0.0121511	0.0102149	0.00419339	0.010533	0.00503825	0.00821147	0.0103752	0.0132764	0.0177566	0.00563653
0.0301819	0.020236	0.0209024	0.0159351	0.00914856	0.00293098	0.0231495	0.0139669	0.00527545	0.0205607	0.0108004	0.00653189	0.010279	0.00294616	0.0171334	0.00696077	0.0118901	0.0152702	0.0112574	0.0172896	0.0168892	0.00944854	0.00929929	0.0107715	0.0159415	0.00119832	0.0215086	0.0115036	0.0131365	0.00173681	0.0223274	0.00827822	0.00404111	0.0195948	0.0107383	0.013987	0.0104374	0.014543	0.00248219	0.00304155	0.0118326	0.0106086	0.0046123	0.010637	0.00454631	0.0078944	0.0107567	0.0136164	0.0176785	0.00556547
0.0299872	0.0204001	0.0208782	0.0154804	0.00915861	0.00396904	0.0226819	0.0136185	0.00528536	0.0202272	0.010535	0.0066763	0.0104636	0.0023003	0.0172368	0.00710115	0.0121411	0.0150176	0.010558	0.0168675	0.0166698	0.00918821	0.00957204	0.0104752	0.0160436	0.00116797	0.0215147	0.0118454	0.0134289	0.00150326	0.0227107	0.00858128	0.00330397	0.0199288	0.0109516	0.0139971	0.0103506	0.0148932	0.00188701	0.00277163	0.0114824	0.0110413	0.00509207	0.0107153	0.00407461	0.00757402	0.0111334	0.0139576	0.0175772	0.00559954
0.0297596	0.0205449	0.0208238	0.0150153	0.00917909	0.00504027	0.022228	0.0132593	0.00530592	0.019901	0.0102566	0.00682393	0.0106582	0.00165828	0.0173135	0.00724381	0.0123947	0.014742	0.00985423	0.0164449	0.016434	0.0089304	0.00986114	0.0101773	0.016138	0.00125871	0.0215398	0.0121813	0.0137107	0.00134403	0.0230714	0.0088805	0.00256304	0.0202514	0.0112157	0.0140149	0.010251	0.0152225	0.00129603	0.00261805	0.0111143	0.0115177	0.00560082	0.0107678	0.00364775	0.00724683	0.0115116	0.0143019	0.0174452	0.00573955
0.0295082	0.0206643	0.020741	0.0145343	0.00920426	0.00613056	0.0218031	0.0128868	0.00533107	0.0195815	0.00996812	0.00697645	0.0108608	0.00102719	0.0173731	0.00739175	0.012651	0.0144454	0.0091438	0.0160043	0.016187	0.00867896	0.0101598	0.00987689	0.0162209	0.00145535	0.0215806	0.0125096	0.0139818	0.00126371	0.0234125	0.00917626	0.00183894	0.020561	0.0114672	0.014004	0.0101318	0.0155257	0.000694459	0.002593	0.0107236	0.0120318	0.00612135	0.0107826	0.00329094	0.00692858	0.0118774	0.0146159	0.0172874	0.00597078
0.0292275	0.0207569	0.0206335	0.0140343	0.00923766	0.00722573	0.0214085	0.0125019	0.00536207	0.0192722	0.00967169	0.00712129	0.0110612	0.00041085	0.0174171	0.00754541	0.0129026	0.0141279	0.00842981	0.0155668	0.0159315	0.00846515	0.0104657	0.00957513	0.0163012	0.00173188	0.0216486	0.0128256	0.0142469	0.0012816	0.0237428	0.00945719	0.00113438	0.020864	0.0116834	0.0139802	0.00999971	0.0158078	8.58948e-05	0.00271959	0.0103048	0.0125692	0.00665853	0.0107617	0.00301681	0.00660317	0.0122363	0.0149287	0.0171045	0.00627393
0.0289196	0.0208269	0.0205096	0.0135314	0.0092566	0.00833046	0.0210435	0.0121038	0.00540672	0.0189698	0.00935565	0.00726866	0.0112728	0.000259927	0.0174359	0.00770226	0.0131514	0.013789	0.00772256	0.0151256	0.0156573	0.00827441	0.0108102	0.00927647	0.0163771	0.0020429	0.0217491	0.0131384	0.0144981	0.00138845	0.024056	0.0097519	0.000568623	0.0211483	0.0118975	0.0139544	0.00985147	0.0160654	0.000513895	0.00295913	0.0098646	0.0131434	0.00719986	0.0107061	0.00284943	0.0062741	0.0125941	0.0152337	0.0168967	0.00663359
0.0285846	0.0208741	0.0203727	0.0130326	0.0092709	0.00944576	0.0207151	0.0116988	0.00545519	0.0186761	0.00902829	0.00741545	0.0114802	0.000850553	0.0174382	0.00786038	0.0133985	0.0134349	0.00705029	0.0146807	0.0153724	0.00811654	0.0111555	0.00896987	0.0164522	0.00238168	0.0218789	0.0134409	0.0147308	0.00155366	0.024348	0.0100466	0.000718406	0.021419	0.0120911	0.0139292	0.00969172	0.0162975	0.00111334	0.00331996	0.00940414	0.0137267	0.00773662	0.0106305	0.00282199	0.00594731	0.0129351	0.0155343	0.0166596	0.00703724
0.0282221	0.0209013	0.0201906	0.0125274	0.0092805	0.0105624	0.0204165	0.0112875	0.00550383	0.0183866	0.00869131	0.0075635	0.0116877	0.00144769	0.0174156	0.00802721	0.0136454	0.0130611	0.00641738	0.0142403	0.0150809	0.00798665	0.0114602	0.00866094	0.0165167	0.00273032	0.0220216	0.0137355	0.0149526	0.00175868	0.0246285	0.0103081	0.00136267	0.021673	0.0122863	0.0138975	0.00951225	0.0165063	0.0017128	0.00375687	0.00892036	0.0143105	0.00827159	0.0105219	0.00293664	0.00561756	0.0132764	0.0158214	0.0164023	0.00747485
0.0278355	0.0209024	0.0199799	0.0120158	0.00930379	0.0116882	0.0201549	0.0108613	0.00554629	0.0180966	0.0083481	0.00771145	0.0118964	0.00203691	0.0173837	0.00820863	0.0138896	0.0126697	0.00584151	0.0138063	0.0147798	0.00789222	0.011775	0.00836197	0.0165792	0.00308743	0.0221868	0.0140223	0.0151551	0.00198282	0.0248799	0.0105613	0.0020835	0.0219081	0.012464	0.013857	0.00931506	0.0166838	0.00230228	0.00422641	0.00842298	0.0149127	0.00880613	0.0103752	0.00317351	0.00529127	0.0136164	0.0161018	0.0161162	0.00793102
0.0274161	0.0208782	0.0197561	0.0114948	0.00933411	0.0128145	0.0199258	0.0104384	0.00559207	0.0178192	0.00799623	0.00785858	0.012118	0.00261879	0.0173473	0.00839485	0.0141293	0.0122683	0.0053478	0.0133725	0.0144721	0.00783457	0.0120797	0.00805884	0.0166342	0.00345508	0.0223641	0.0142961	0.0153455	0.00221394	0.0251238	0.0107957	0.00281719	0.0221248	0.0126344	0.0138122	0.00911452	0.0168367	0.00289039	0.00471269	0.00790929	0.0155167	0.00932219	0.0102112	0.00350463	0.00496992	0.0139576	0.0163702	0.0158127	0.00840913
0.0269872	0.0208238	0.019514	0.0109644	0.00937343	0.0139248	0.0197263	0.0100137	0.00564041	0.0175449	0.0076368	0.00801068	0.0123557	0.00318531	0.0172923	0.00858909	0.0143671	0.0118572	0.00495963	0.0129597	0.014155	0.00781522	0.0123952	0.0077684	0.0166771	0.00381128	0.0225641	0.014563	0.0155139	0.00244896	0.0253388	0.0110296	0.0035498	0.0223184	0.0127929	0.0137583	0.0088793	0.016966	0.00347098	0.00521445	0.00737985	0.0161285	0.00983336	0.0100397	0.00389786	0.00465938	0.0143019	0.0166322	0.0154862	0.00889085
0.0265563	0.020741	0.0192514	0.010431	0.00941755	0.0150411	0.0195693	0.00958964	0.00568574	0.0172769	0.00727719	0.00815701	0.0125835	0.00374183	0.0171988	0.00879252	0.0146011	0.0114141	0.00471074	0.012561	0.0138266	0.00782871	0.0127153	0.00748611	0.0167186	0.00416961	0.0227991	0.0148194	0.0156663	0.00268975	0.0255367	0.0112549	0.00428628	0.022493	0.0129433	0.0136945	0.00863154	0.017067	0.00405239	0.00572929	0.00684792	0.0167365	0.0103306	0.00983581	0.00433503	0.0043523	0.0146159	0.0168878	0.0151325	0.00937458
0.0260989	0.0206335	0.0189606	0.00990898	0.00946707	0.0161456	0.0194373	0.00915998	0.00573178	0.0170173	0.00691536	0.0082981	0.0128104	0.0042899	0.0170924	0.00899925	0.0148311	0.0109716	0.00462658	0.0121797	0.0134915	0.00787304	0.0130333	0.00720151	0.0167534	0.00452968	0.0230228	0.0150665	0.015801	0.00291226	0.0257162	0.0114732	0.0050271	0.0226411	0.0130865	0.0136281	0.00838683	0.0171348	0.00462448	0.00625063	0.00631233	0.0173446	0.0108109	0.00959248	0.00481246	0.00405963	0.0149287	0.0171264	0.0147633	0.00984895
0.0256208	0.0205096	0.0186523	0.00938568	0.00952706	0.0172343	0.0193439	0.00873598	0.00578397	0.0167576	0.00655644	0.0084401	0.0130295	0.00482299	0.0169766	0.0092122	0.0150521	0.0105301	0.0047279	0.0118142	0.0131533	0.00795709	0.0133421	0.0069242	0.0167793	0.0048772	0.0232496	0.0153013	0.0159237	0.00312652	0.0258876	0.0116732	0.00576177	0.0227946	0.0132228	0.0135518	0.00812928	0.0171744	0.00519135	0.00675293	0.00577545	0.0179524	0.0112789	0.00930959	0.00530949	0.00378469	0.0152337	0.0173546	0.0143719	0.0103182
0.0251185	0.0203727	0.0183174	0.00886973	0.00958878	0.0183179	0.019276	0.00831745	0.00584332	0.0165021	0.00619662	0.00859256	0.0132523	0.00534224	0.0168425	0.00943271	0.0152703	0.0100877	0.00502691	0.0114695	0.0128085	0.00806661	0.0136479	0.00665507	0.0168034	0.00521975	0.0234944	0.0155229	0.0160276	0.0033346	0.0260126	0.0118599	0.00648834	0.0229328	0.013339	0.0134711	0.00786449	0.017185	0.00574548	0.00726245	0.00524201	0.0185519	0.011728	0.00900272	0.00582043	0.00353143	0.0155343	0.0175694	0.0139598	0.0107833
0.0245973	0.0201906	0.0179664	0.00836947	0.00965866	0.019388	0.0192327	0.00790936	0.00590577	0.0162406	0.00584316	0.00874849	0.0134786	0.00584904	0.0166965	0.00965734	0.0154791	0.00964817	0.00547256	0.0111408	0.0124533	0.00821385	0.0139495	0.00639347	0.0168267	0.00555463	0.0237275	0.0157328	0.0161107	0.00353132	0.0260754	0.0120391	0.00720716	0.0230009	0.0134478	0.0133841	0.00758657	0.017168	0.00629306	0.00777202	0.00473443	0.0191524	0.0121603	0.00868595	0.00635087	0.00330497	0.0158214	0.0177807	0.0135191	0.0112298
0.0240645	0.0199799	0.0176006	0.00788173	0.00973417	0.0204461	0.0192134	0.00751208	0.00597492	0.015981	0.00548957	0.00890544	0.0137007	0.00634053	0.0165282	0.0098861	0.0156824	0.00920561	0.00603335	0.0108418	0.0121059	0.00838477	0.0142372	0.00614618	0.0168477	0.0058799	0.0239594	0.0159364	0.0161791	0.00372107	0.0261383	0.0121997	0.00790867	0.0230394	0.0135463	0.0132846	0.00729367	0.0171311	0.00683499	0.00826058	0.00426218	0.019741	0.0125814	0.00834508	0.00688818	0.0031185	0.0161018	0.0179785	0.0130672	0.0116607
0.0235176	0.0197561	0.0172173	0.00741703	0.00982176	0.0214866	0.019218	0.00712646	0.00604596	0.0157273	0.00514852	0.00906464	0.0139205	0.00681698	0.0163433	0.0101251	0.0158817	0.00876819	0.00667793	0.0105762	0.0117594	0.00858196	0.0145217	0.00590778	0.016862	0.00620554	0.02418	0.0161231	0.0162239	0.00389735	0.0261798	0.0123477	0.00860485	0.0230638	0.0136363	0.0131839	0.00698892	0.0170597	0.0073639	0.00873917	0.00385424	0.0203128	0.0129825	0.00797841	0.00741739	0.00297065	0.0163702	0.0181676	0.0126005	0.0120689
0.0229575	0.019514	0.0168113	0.00697138	0.00991206	0.0225178	0.0192362	0.00676178	0.00612913	0.0154751	0.00484012	0.00923089	0.0141388	0.00728002	0.0161435	0.0103618	0.0160694	0.0083303	0.00738283	0.0103448	0.0114086	0.00879792	0.0147923	0.00567928	0.0168642	0.00652247	0.024399	0.016299	0.0162537	0.0040653	0.0262057	0.0124818	0.00929107	0.0230574	0.0137144	0.0130826	0.00667081	0.0169567	0.00788972	0.00920111	0.0035265	0.0208802	0.0133616	0.00760112	0.0079335	0.00286931	0.0166322	0.0183424	0.0121223	0.0124596
0.0223865	0.0192514	0.0163785	0.00655425	0.0100131	0.0235251	0.0192755	0.00641661	0.00622073	0.0152235	0.00454932	0.00939167	0.0143533	0.00772675	0.0159327	0.0106063	0.0162611	0.00790852	0.0081361	0.0101486	0.0110694	0.00903856	0.0150628	0.00546269	0.0168638	0.00682219	0.0246221	0.0164604	0.0162786	0.00421536	0.0262058	0.0125987	0.00995521	0.0230243	0.0137852	0.0129826	0.0063418	0.0168408	0.00839729	0.0096511	0.00331738	0.0214321	0.0137231	0.00721565	0.00844267	0.00283015	0.0168878	0.018508	0.0116347	0.0128317
0.0218082	0.0189606	0.0159351	0.00617144	0.010121	0.0245085	0.0193239	0.00610252	0.00632265	0.0149698	0.00427362	0.00956215	0.0145573	0.00815109	0.0157024	0.0108607	0.0164418	0.00749523	0.00892114	0.00998372	0.0107267	0.00929929	0.0153162	0.00525152	0.016855	0.00710747	0.0248413	0.0166146	0.0162927	0.00434991	0.0261775	0.0126994	0.0106179	0.0229648	0.0138432	0.0128743	0.00600798	0.0166927	0.00888297	0.0100797	0.0032605	0.0219737	0.0140604	0.00680561	0.00894679	0.00285446	0.0171264	0.0186584	0.0111445	0.0131794
0.0212238	0.0186523	0.0154804	0.005831	0.0102361	0.0254674	0.0193888	0.00580764	0.00645455	0.0147216	0.00404385	0.00973847	0.0147596	0.00856184	0.0154634	0.0111276	0.0166314	0.00709981	0.00972013	0.00985918	0.0103908	0.00957204	0.0155611	0.00505937	0.0168408	0.00738566	0.0250537	0.0167534	0.0162925	0.00446385	0.0261278	0.0127835	0.0112776	0.022872	0.0138962	0.0127602	0.00567526	0.0165436	0.00935655	0.0104897	0.00337006	0.022505	0.0143802	0.00637875	0.00944901	0.00293984	0.0173546	0.0187977	0.0106479	0.0135094
0.0206347	0.0183174	0.0150153	0.00554467	0.0103605	0.0264088	0.0194606	0.00554656	0.00660486	0.0144744	0.00386235	0.00991173	0.01496	0.00896254	0.0152084	0.01139	0.0167993	0.00673384	0.0105261	0.00978315	0.0100651	0.00986114	0.0157965	0.00488116	0.0168162	0.00765173	0.0252594	0.0168752	0.0162514	0.00457069	0.0260527	0.0128418	0.0119062	0.0227557	0.0139383	0.0126411	0.00534091	0.0163734	0.0098201	0.0108789	0.00363267	0.0230081	0.0146804	0.00593228	0.00994034	0.0030796	0.0175694	0.0189202	0.0101513	0.0138191
0.0200465	0.0179664	0.0145343	0.00531056	0.0104989	0.0273203	0.0195311	0.00532597	0.00676656	0.0142235	0.00373734	0.010095	0.0151525	0.00933947	0.0149395	0.0116373	0.0169163	0.00640398	0.0113362	0.00973896	0.00974345	0.0101598	0.0160171	0.00471341	0.0167882	0.00790616	0.0254534	0.0169955	0.0161827	0.00466154	0.0259419	0.0128972	0.0125053	0.0226126	0.0139683	0.012521	0.00501199	0.0161221	0.0102563	0.0112601	0.00402051	0.0234998	0.0149595	0.00547424	0.0104172	0.00327169	0.0177807	0.0190445	0.00965802	0.0141011
0.0194548	0.0176006	0.0140343	0.0051459	0.0106452	0.0282014	0.0196045	0.00514703	0.00694222	0.0139733	0.00367188	0.010279	0.0153285	0.00969607	0.0146666	0.0118901	0.0170333	0.00611168	0.0121476	0.00972311	0.00944854	0.0104657	0.0162273	0.00456766	0.0167501	0.00815152	0.0256333	0.0170941	0.0161071	0.00473958	0.0258049	0.0129385	0.0130907	0.0224367	0.013987	0.0123987	0.00468559	0.015858	0.0106752	0.0116256	0.00450331	0.0239844	0.0152177	0.00501063	0.0108861	0.00350399	0.0179785	0.0191515	0.00916755	0.01436
0.0188723	0.0172173	0.0135314	0.00505234	0.010798	0.0290654	0.0196754	0.00502353	0.00713537	0.0137204	0.00367529	0.0104636	0.0154949	0.0100358	0.0143803	0.0121411	0.0171507	0.00586686	0.0129596	0.0097417	0.00918821	0.0108102	0.0164222	0.00442661	0.0167294	0.00838475	0.0257992	0.0171846	0.0160109	0.00481254	0.0256433	0.0129665	0.0136582	0.0222305	0.0139971	0.0122712	0.00437579	0.015574	0.0110856	0.0119685	0.00505389	0.0244794	0.0154483	0.00453671	0.0113455	0.00376734	0.0181676	0.0192716	0.00868527	0.0145871
0.018301	0.0168113	0.0130326	0.00502595	0.0109667	0.0298951	0.0197707	0.00493985	0.00735356	0.0134713	0.0037477	0.0106582	0.0156463	0.010354	0.0140891	0.0123947	0.0172631	0.00567284	0.0137551	0.00979583	0.0089304	0.0111555	0.0166005	0.00430053	0.0167073	0.00860409	0.0259609	0.0172516	0.0158967	0.00486267	0.0254538	0.0129756	0.0142082	0.021987	0.0140149	0.0121365	0.00409938	0.0152777	0.0114798	0.0122873	0.00563892	0.0249413	0.0156593	0.00406074	0.011794	0.00405593	0.0183424	0.0193564	0.00821106	0.0147892
0.0177445	0.0163785	0.0125274	0.00507353	0.01115	0.0307023	0.0198543	0.00489572	0.00759811	0.0132319	0.00389182	0.0108608	0.0157827	0.010652	0.0137855	0.012651	0.0173514	0.00552931	0.0145424	0.00986888	0.00867896	0.0114602	0.0167647	0.0042001	0.0166533	0.00880382	0.0261055	0.0173023	0.0157612	0.00490346	0.0252359	0.0129637	0.01475	0.0217148	0.014004	0.0119948	0.00384993	0.0149544	0.0118514	0.0125904	0.00625949	0.0253734	0.015852	0.00357592	0.0122382	0.00436777	0.018508	0.0193878	0.00776738	0.01497
0.0172027	0.0159351	0.0120158	0.00518753	0.0113416	0.0314764	0.0199254	0.00490352	0.00786005	0.0129919	0.00408156	0.0110612	0.0159105	0.010934	0.0134652	0.0129026	0.0174136	0.00544358	0.0153204	0.00998052	0.00846515	0.011775	0.0169126	0.00411951	0.0165958	0.00899391	0.0262258	0.01733	0.0156152	0.00492888	0.0249827	0.0129439	0.0152628	0.0214103	0.0139802	0.0118581	0.00364226	0.0146081	0.0122036	0.0128697	0.00690642	0.0257959	0.0160228	0.0031012	0.0126623	0.00469344	0.0186584	0.0194212	0.00735382	0.0151159
0.0166842	0.0154804	0.0114948	0.00536311	0.011542	0.0322173	0.0199876	0.00494952	0.00814226	0.0127424	0.00432048	0.0112728	0.0160314	0.0111919	0.0131436	0.0131514	0.0174591	0.00541573	0.0160798	0.0101211	0.00827441	0.0120797	0.0170596	0.00404808	0.016528	0.00916965	0.0263357	0.0173632	0.0154449	0.00494097	0.0247131	0.0129386	0.0157523	0.0210813	0.0139544	0.0117219	0.00348871	0.0142546	0.0125316	0.0131356	0.00757232	0.0262078	0.016176	0.00263285	0.0130783	0.00503351	0.0187977	0.0194484	0.00698057	0.0152345
0.0161937	0.0150153	0.0109644	0.00558246	0.0117476	0.0329259	0.0200368	0.00503099	0.00844859	0.0125	0.0046005	0.0114802	0.0161357	0.0114299	0.0128124	0.0133985	0.0174997	0.00544962	0.0168197	0.0102794	0.00811654	0.0123952	0.0171831	0.00399123	0.016459	0.00932955	0.0264201	0.0174013	0.0152545	0.00493729	0.0244125	0.0128956	0.0162203	0.0207159	0.0139292	0.011579	0.00339781	0.0138719	0.0128435	0.0134097	0.00824901	0.0265743	0.0163058	0.00219002	0.013485	0.00538825	0.0189202	0.019473	0.00665126	0.0153224
0.015726	0.0145343	0.010431	0.00584193	0.0119643	0.0335925	0.0200784	0.00514802	0.00877057	0.0122603	0.00490767	0.0116877	0.0162252	0.0116494	0.0124713	0.0136454	0.0175354	0.00554346	0.0175414	0.0104547	0.00798665	0.0127153	0.0172708	0.00394825	0.0163909	0.00947764	0.026498	0.0174143	0.0150478	0.00491429	0.0240899	0.0127912	0.0166614	0.0203186	0.0138975	0.0114397	0.0033886	0.0134797	0.0131356	0.0136209	0.0089271	0.02688	0.0164088	0.00181042	0.0138771	0.00574902	0.0190445	0.0194857	0.00638431	0.0153903
0.0152926	0.0140343	0.00990898	0.00613547	0.0121936	0.0342329	0.0201092	0.00529233	0.00911292	0.0120165	0.00524314	0.0118964	0.0163015	0.0118452	0.0121317	0.0138896	0.0175522	0.00569586	0.0182397	0.0106406	0.00789222	0.0130333	0.0173537	0.0039111	0.0163129	0.00960611	0.0265495	0.0174157	0.0148251	0.0048824	0.0237429	0.0126934	0.0170839	0.019888	0.013857	0.0112922	0.00346113	0.013078	0.0134	0.0137963	0.00961033	0.0271791	0.0164908	0.00154104	0.0142564	0.00611874	0.0191515	0.019496	0.00618701	0.0154338
0.0148693	0.0135314	0.00938568	0.00645883	0.0124397	0.0348303	0.0201246	0.00545565	0.0094751	0.0117743	0.00559312	0.012118	0.0163843	0.0120266	0.0118095	0.0141293	0.0175492	0.00589306	0.0189132	0.0108428	0.00783457	0.0133421	0.0174254	0.00389081	0.0162245	0.00971421	0.0265839	0.0173967	0.0145829	0.0048408	0.0233568	0.0125884	0.0174743	0.0194329	0.0138122	0.0111424	0.00361591	0.0126486	0.0136432	0.013953	0.010287	0.0274607	0.0165506	0.00144715	0.0146207	0.00649616	0.0192716	0.0194873	0.00608039	0.015442
0.0144926	0.0130326	0.00886973	0.00680895	0.0126958	0.0354022	0.0201214	0.00563637	0.0098546	0.0115308	0.00596246	0.0123557	0.0164536	0.0121819	0.0114657	0.0143671	0.0175296	0.00612517	0.0195668	0.0110507	0.00781522	0.0136479	0.0174854	0.00387839	0.016129	0.00980818	0.0266074	0.0173783	0.0143174	0.00478589	0.0229453	0.0124709	0.0178492	0.0189522	0.0137583	0.010992	0.00384836	0.0121959	0.0138622	0.0140809	0.0109632	0.0277283	0.0165864	0.00158536	0.0149721	0.00688395	0.0193564	0.0194724	0.00606193	0.0154256
0.0141658	0.0125274	0.00836947	0.00717686	0.0129565	0.0359505	0.0200955	0.00583044	0.010244	0.0112827	0.00633021	0.0125835	0.0164581	0.0123133	0.011084	0.0146011	0.0174917	0.00638429	0.0201993	0.0112668	0.00782871	0.0139495	0.0175347	0.00388082	0.0160215	0.0098867	0.0266167	0.0173448	0.0140331	0.00471694	0.022511	0.012334	0.0182011	0.0184459	0.0136945	0.0108394	0.0041461	0.0117419	0.0140627	0.0141961	0.0116306	0.027965	0.0166092	0.0018815	0.0153251	0.00727218	0.0193878	0.0194406	0.00611478	0.015385
0.0138814	0.0120158	0.00788173	0.00755555	0.0132317	0.0364477	0.0200552	0.00603409	0.010652	0.0110352	0.00670625	0.0128104	0.0164477	0.012426	0.0107056	0.0148311	0.0174285	0.00666643	0.0207935	0.0114798	0.00787304	0.0142372	0.0175623	0.00389445	0.0159075	0.00994713	0.0265988	0.0173039	0.0137296	0.00463562	0.0220576	0.0121848	0.0185308	0.0179153	0.0136281	0.010683	0.00449447	0.0112679	0.0142404	0.0142857	0.0122921	0.0281808	0.0166075	0.00229039	0.0156661	0.00765412	0.0194212	0.0194058	0.00624265	0.0153225
0.0136494	0.0114948	0.00741703	0.00794202	0.0135224	0.0368952	0.0199946	0.00623714	0.0110826	0.010794	0.00708389	0.0130295	0.0164225	0.0125135	0.0103307	0.0150521	0.0173542	0.00696751	0.0213799	0.0116917	0.00795709	0.0145217	0.0175693	0.00389674	0.0157849	0.00999125	0.0265872	0.0172548	0.0134048	0.00454887	0.0215827	0.0120159	0.018832	0.0173631	0.0135518	0.0105236	0.00488564	0.0107876	0.0143938	0.0143576	0.0129465	0.028366	0.016587	0.00275038	0.0159747	0.00804685	0.0194484	0.0193554	0.00645967	0.0152247
0.0134589	0.0109644	0.00697138	0.00833288	0.0138236	0.0373088	0.0199125	0.0064364	0.011521	0.0105529	0.0074631	0.0132523	0.0163875	0.01258	0.00996301	0.0152703	0.0172579	0.00728246	0.0219467	0.0118992	0.00806661	0.0147923	0.0175582	0.00390895	0.015646	0.0100207	0.0265583	0.0172012	0.0130627	0.0044492	0.0210671	0.0118354	0.0191021	0.0167763	0.0134711	0.0103632	0.00531207	0.0102935	0.0145271	0.0144033	0.0135902	0.0285291	0.0165427	0.00324683	0.0162888	0.00843484	0.019473	0.0192891	0.0067671	0.0151095
0.0133267	0.010431	0.00655425	0.00872102	0.01413	0.0376836	0.0198182	0.00663338	0.0119676	0.0103115	0.00783898	0.0134786	0.0163399	0.012622	0.00959284	0.0154791	0.0171387	0.00760862	0.0224478	0.0121058	0.00821385	0.0150628	0.0175297	0.00393902	0.0154915	0.0100345	0.0264629	0.0171385	0.0127029	0.00433841	0.0205225	0.0116341	0.019352	0.016144	0.0133841	0.010195	0.00576048	0.00978158	0.0146325	0.0144258	0.0142205	0.0286673	0.0164774	0.00377489	0.0165979	0.00882716	0.0194857	0.0192206	0.00713292	0.0149754
0.0132435	0.00990898	0.00617144	0.00911414	0.0144522	0.0380127	0.0197025	0.00683448	0.0124171	0.0100727	0.0082164	0.0137007	0.0162738	0.0126434	0.00921687	0.0156824	0.0169935	0.00793458	0.0229188	0.0123072	0.00838477	0.0153162	0.0174846	0.00396484	0.0153355	0.0100267	0.0263654	0.0170651	0.0123229	0.0042218	0.0199768	0.0114125	0.0195748	0.0155028	0.0132846	0.0100309	0.00623719	0.00926391	0.0147156	0.0144266	0.0148304	0.0287786	0.0163947	0.00431794	0.0168874	0.00921665	0.019496	0.0191347	0.00755863	0.0148115
0.0132125	0.00938568	0.005831	0.00949817	0.0147834	0.0383101	0.0195631	0.00703	0.0128702	0.00982715	0.00857869	0.0139205	0.01619	0.0126489	0.00883799	0.0158817	0.0168366	0.00825724	0.0233604	0.012496	0.00858196	0.0155611	0.0174204	0.00398908	0.0151697	0.00999862	0.0262535	0.0169892	0.0119226	0.00409737	0.0194133	0.0111933	0.0197725	0.0148436	0.0131839	0.00986242	0.00672037	0.008735	0.0147808	0.0144007	0.015428	0.0288682	0.0162853	0.00486976	0.0171457	0.00960555	0.0194873	0.019047	0.00802651	0.0146232
0.0132308	0.00886973	0.00554467	0.00988204	0.015121	0.0385619	0.0194026	0.00722568	0.0133309	0.0095807	0.00893286	0.0141388	0.0160808	0.0126396	0.00846099	0.0160694	0.016666	0.00858322	0.0237729	0.0126711	0.00879792	0.0157965	0.01733	0.00401254	0.014995	0.00995117	0.0261314	0.0169162	0.0115076	0.00397578	0.0188303	0.0109572	0.0199366	0.0141604	0.0130826	0.00969126	0.00721216	0.00819084	0.0148212	0.0143423	0.0160124	0.0289177	0.0161647	0.00541681	0.017398	0.00999308	0.0194724	0.0189492	0.00853102	0.0144153
0.013296	0.00836947	0.00531056	0.0102689	0.0154589	0.0387681	0.0192283	0.00740526	0.0137957	0.00934098	0.00927705	0.0143533	0.015957	0.0126096	0.00808796	0.0162611	0.0164724	0.00890694	0.0241503	0.0128371	0.00903856	0.0160171	0.0172303	0.00403927	0.0148081	0.00988868	0.0259959	0.0168304	0.0110761	0.00384511	0.0182301	0.0107029	0.0200814	0.0134578	0.0129826	0.00952315	0.00771404	0.00764462	0.0148303	0.0142688	0.0165746	0.0289385	0.0160288	0.00597793	0.0176435	0.0103752	0.0194406	0.0188386	0.00906351	0.0141975
0.0134078	0.00788173	0.0051459	0.010638	0.0157984	0.0389369	0.0190432	0.00756608	0.0142676	0.00909826	0.00960888	0.0145573	0.0158121	0.0125515	0.00771612	0.0164418	0.0162659	0.00922228	0.0244965	0.012986	0.00929929	0.0162273	0.0171155	0.00406668	0.014594	0.00980532	0.0258327	0.0167339	0.0106305	0.00371781	0.0176116	0.010419	0.0202018	0.0127446	0.0128743	0.0093506	0.00822647	0.0070938	0.0148289	0.014183	0.0171241	0.0289332	0.0158793	0.00652737	0.0178739	0.0107567	0.0194058	0.0187251	0.00961621	0.0139611
0.0135659	0.00741703	0.00505234	0.010993	0.0161435	0.0390723	0.0188369	0.00772522	0.0147461	0.00885288	0.00992912	0.0147596	0.0156474	0.0124759	0.0073491	0.0166314	0.0160603	0.00952969	0.0248211	0.0131265	0.00957204	0.0164222	0.0169792	0.00409364	0.0143725	0.00970227	0.0256476	0.0166441	0.0101878	0.00359722	0.0169748	0.0101329	0.0203153	0.0120105	0.0127602	0.00917383	0.00873824	0.00655012	0.0148047	0.0140753	0.017653	0.0289026	0.0157137	0.00707063	0.0181003	0.0111334	0.0193554	0.0186053	0.0101957	0.0137083
0.0137612	0.00697138	0.00502595	0.0113356	0.0165029	0.0391654	0.0186096	0.00785783	0.0152265	0.00860813	0.0102365	0.01496	0.0154712	0.0123809	0.00698703	0.0167993	0.0158403	0.00982665	0.0251109	0.0132487	0.00986114	0.0166005	0.0168308	0.00412045	0.0141355	0.0095823	0.025458	0.0165476	0.00968412	0.00349272	0.016327	0.00982964	0.0203655	0.0112562	0.0126411	0.00899664	0.00925019	0.00598758	0.0147536	0.0139479	0.0181619	0.0288376	0.0155351	0.00760083	0.0183235	0.0115116	0.0192891	0.0184772	0.0107945	0.0134406
0.0139881	0.00655425	0.00507353	0.0116596	0.0168645	0.0392208	0.018363	0.00798721	0.0157062	0.00836232	0.0105395	0.0151525	0.0152771	0.0122641	0.00663153	0.0169163	0.0155825	0.0101125	0.0253735	0.0133587	0.0101598	0.0167647	0.0166673	0.00415261	0.01389	0.00943968	0.0252571	0.0164497	0.00913914	0.00340227	0.015666	0.00951435	0.020359	0.0104969	0.012521	0.00881745	0.00976454	0.00539199	0.0146886	0.013802	0.0186495	0.0287513	0.015345	0.00812328	0.0185476	0.0118774	0.0192206	0.0183406	0.0113918	0.0131643
0.0142439	0.00617144	0.00518753	0.011963	0.0172259	0.039235	0.0180938	0.00810009	0.016187	0.0081168	0.0108303	0.0153285	0.0150584	0.012128	0.00628457	0.0170333	0.0153149	0.0103893	0.0255989	0.0134509	0.0104657	0.0169126	0.0164911	0.00418293	0.0136353	0.00928075	0.0250414	0.0163351	0.00860778	0.00333198	0.0149871	0.00918517	0.020357	0.0097326	0.0123987	0.00864365	0.0102762	0.00480746	0.0145884	0.0136361	0.0191036	0.0286378	0.0151366	0.00864637	0.0187591	0.0122363	0.0191347	0.0182035	0.0119955	0.01288
0.01452	0.005831	0.00536311	0.0122642	0.0175863	0.0392058	0.0178144	0.00819021	0.0166648	0.00787357	0.0111084	0.0154949	0.0148246	0.0119755	0.00595228	0.0171507	0.0150413	0.0106498	0.025786	0.0135241	0.0108102	0.0170596	0.016296	0.00421282	0.0133959	0.00909447	0.0248152	0.0162283	0.00807047	0.00327274	0.0143072	0.00883827	0.0203304	0.00895744	0.0122712	0.00846053	0.0107772	0.00422689	0.0144779	0.0134567	0.0195404	0.0284952	0.0149271	0.00915492	0.0189584	0.0125941	0.019047	0.018065	0.0126054	0.012593
0.0148277	0.00554467	0.00558246	0.0125551	0.0179533	0.0391405	0.0175471	0.00826827	0.0171292	0.00762231	0.0113651	0.0156463	0.0145793	0.0118046	0.0056398	0.0172631	0.0147709	0.0108959	0.0259435	0.013572	0.0111555	0.0171831	0.0160898	0.00424183	0.0131273	0.00889444	0.0245782	0.0161115	0.00751618	0.00324345	0.0136239	0.00847483	0.0202869	0.00817071	0.0121365	0.00828187	0.0112731	0.00364337	0.0143503	0.0132566	0.0199521	0.0283254	0.014707	0.00965684	0.0191469	0.0129351	0.0189492	0.0179112	0.0132119	0.0123042
0.0151471	0.00531056	0.00584193	0.012837	0.018318	0.0390422	0.0172334	0.00832406	0.0175903	0.0073677	0.0116034	0.0157827	0.0143213	0.0116236	0.00533549	0.0173514	0.0144923	0.0111382	0.026066	0.0136111	0.0114602	0.0172708	0.0158667	0.00427158	0.0127941	0.00867117	0.0243331	0.0159984	0.00695586	0.00325968	0.0129377	0.00809734	0.0202095	0.00738564	0.0119948	0.00809898	0.0117681	0.00306777	0.0141939	0.0130343	0.0203431	0.028128	0.0144807	0.0101458	0.0193243	0.0132764	0.0188386	0.0177541	0.0138233	0.0120148
0.0154655	0.0051459	0.00613547	0.0131043	0.0186692	0.0389014	0.0168807	0.00836896	0.0180474	0.00711076	0.0118194	0.0159105	0.0140383	0.0114344	0.00504405	0.0174136	0.014208	0.0113651	0.0261541	0.0136334	0.011775	0.0173537	0.0156353	0.00431006	0.0124668	0.00842545	0.0240874	0.0158936	0.00638538	0.0033115	0.0122527	0.00770063	0.0201124	0.00661154	0.0118581	0.00791032	0.0122593	0.00248219	0.0140299	0.0128013	0.0207079	0.0278992	0.014263	0.0106286	0.0194891	0.0136164	0.0187251	0.017618	0.0144278	0.0117387
0.0158026	0.00505234	0.00645883	0.0133552	0.0190323	0.0387132	0.0165253	0.00840223	0.018498	0.00686027	0.0120233	0.0160314	0.0137438	0.0112326	0.00477268	0.0174591	0.0139249	0.0115727	0.0262129	0.0136362	0.0120797	0.0174254	0.0153948	0.00435029	0.012126	0.00817069	0.0238393	0.015811	0.00580026	0.00341603	0.011571	0.00729626	0.0199864	0.00584825	0.0117219	0.00772671	0.0127385	0.00188701	0.0138431	0.0125654	0.0210409	0.0276527	0.0140332	0.0111037	0.0196501	0.0139576	0.0186053	0.0174827	0.0150295	0.0114765
0.0161438	0.00502595	0.00680895	0.0135935	0.0194069	0.0384983	0.0161537	0.00842001	0.0189358	0.00661459	0.0122099	0.0161357	0.0134228	0.0110247	0.00451782	0.0174997	0.0136225	0.0117691	0.0262441	0.0136274	0.0123952	0.0174854	0.0151452	0.00439938	0.0117781	0.00789057	0.0235862	0.0157135	0.00520721	0.00356145	0.0108992	0.00688089	0.0198293	0.00513028	0.011579	0.00753919	0.0132072	0.00129603	0.0136279	0.0123254	0.021344	0.0273745	0.0137991	0.0115647	0.0198164	0.0143019	0.0184772	0.0173529	0.0156269	0.0112292
0.0164916	0.00507353	0.00717686	0.0138172	0.0197655	0.0382598	0.0157669	0.00841432	0.019359	0.00637383	0.012375	0.0162252	0.0130938	0.0108083	0.00429005	0.0175354	0.0133221	0.0119536	0.0262375	0.0136021	0.0127153	0.0175347	0.014886	0.00444865	0.0114244	0.0075956	0.0233319	0.0155721	0.00460115	0.00374794	0.0102462	0.00644758	0.019638	0.00446582	0.0114397	0.00735424	0.0136707	0.000694459	0.0134048	0.0120523	0.0216273	0.0270525	0.0135714	0.0120144	0.019983	0.0146159	0.0183406	0.0172199	0.0162208	0.0110051
0.0168428	0.00518753	0.00755555	0.0140214	0.0201233	0.0379935	0.0153636	0.00839364	0.019776	0.00613306	0.0125194	0.0163015	0.012747	0.0105787	0.00408941	0.0175522	0.0130363	0.0121216	0.0261896	0.0135644	0.0130333	0.0175623	0.0146151	0.00450617	0.0110541	0.00727803	0.0230687	0.0154467	0.00398392	0.00397116	0.00960968	0.00603355	0.0194235	0.00386881	0.0112922	0.00716876	0.0141128	8.58948e-05	0.0131548	0.0117604	0.0218767	0.0267098	0.0133455	0.012446	0.0201352	0.0149287	0.0182035	0.0170829	0.0168069	0.0108049
0.0171901	0.00536311	0.00794202	0.0142142	0.0204788	0.0376979	0.0149614	0.00835555	0.020181	0.00591101	0.0126541	0.0163843	0.0124013	0.0103389	0.00392649	0.0175492	0.0127481	0.0122746	0.0261152	0.013517	0.0133421	0.0175693	0.0143451	0.00456804	0.0106695	0.00694309	0.0228075	0.015321	0.00335935	0.00422916	0.00900286	0.00559611	0.0191926	0.00339813	0.0111424	0.00698236	0.014548	0.000513895	0.01289	0.0114641	0.0221179	0.0263566	0.0131257	0.0128632	0.0202866	0.0152337	0.018065	0.0169508	0.0173817	0.0106443
0.017571	0.00558246	0.00833288	0.0143924	0.0208343	0.0373659	0.014541	0.0083022	0.0205677	0.00567903	0.0127683	0.0164536	0.0120373	0.0101026	0.00379542	0.0175296	0.0124518	0.0124118	0.0260092	0.0134543	0.0136479	0.0175582	0.0140588	0.00464082	0.0102706	0.00659483	0.0225423	0.0152128	0.0027307	0.00451944	0.00842831	0.00515776	0.0189227	0.00312685	0.010992	0.00679221	0.0149675	0.00111334	0.0126059	0.0111697	0.0223353	0.0259915	0.0129201	0.0132608	0.020434	0.0155343	0.0179112	0.0168232	0.0179435	0.0105189
0.0179247	0.00584193	0.00872102	0.0145456	0.0211838	0.0369934	0.014113	0.00822673	0.02095	0.00543491	0.0128705	0.0164581	0.011637	0.00985871	0.00367835	0.0174917	0.0121667	0.01254	0.025877	0.0133752	0.0139495	0.0175297	0.0137698	0.00472274	0.00985601	0.00623051	0.0222859	0.0151085	0.00209848	0.0048417	0.00790089	0.00471978	0.0186317	0.00311665	0.0108394	0.00660249	0.0153769	0.0017128	0.0123027	0.0108764	0.0224988	0.0256097	0.0127226	0.0136419	0.0205693	0.0158214	0.0177541	0.0167004	0.018488	0.0104279
0.0182426	0.00613547	0.00911414	0.0146934	0.0215176	0.0365857	0.0136675	0.00813369	0.0213166	0.00519852	0.0129515	0.0164477	0.0112486	0.00961298	0.00359409	0.0174285	0.0118836	0.0126553	0.0257089	0.0132975	0.0142372	0.0174846	0.0134782	0.00481107	0.0094309	0.00585365	0.0220337	0.0150009	0.00147252	0.00518554	0.00743568	0.00427145	0.0183087	0.00336831	0.010683	0.0064086	0.0157749	0.00230228	0.0119966	0.0105713	0.0226337	0.0252008	0.0125382	0.0140102	0.0207069	0.0161018	0.017618	0.016579	0.0190133	0.0103856
0.0185479	0.00645883	0.00949817	0.0148231	0.0218526	0.0361495	0.0132138	0.0080323	0.0216665	0.00496374	0.0130081	0.0164225	0.0108604	0.00937006	0.00355228	0.0173542	0.0115947	0.0127611	0.0255144	0.013214	0.0145217	0.0174204	0.0131892	0.00492071	0.00899562	0.00546979	0.0217934	0.0148835	0.000868927	0.00555538	0.0070376	0.00381376	0.0179647	0.00381032	0.0105236	0.00621606	0.0161549	0.00289039	0.0116666	0.0102612	0.0227376	0.0247618	0.0123704	0.0143553	0.0208377	0.0163702	0.0174827	0.0164787	0.0195195	0.0103897
0.0188327	0.00680895	0.00988204	0.0149389	0.0221751	0.0356871	0.012763	0.00791386	0.0220021	0.00474499	0.0130506	0.0163875	0.0104587	0.00913143	0.00354421	0.0172579	0.0113206	0.0128521	0.0252899	0.0131268	0.0147923	0.01733	0.0129039	0.00504155	0.00854896	0.0050773	0.0215383	0.0147691	0.000436082	0.0059441	0.0067239	0.00335673	0.0175991	0.00439781	0.0103632	0.00602474	0.0165251	0.00347098	0.0113224	0.00994996	0.0228239	0.0242947	0.0122195	0.0146693	0.0209611	0.0166322	0.0173529	0.0163735	0.0200166	0.0104463
0.0191094	0.00717686	0.0102689	0.0150349	0.0224976	0.0352014	0.0123094	0.00778439	0.0223181	0.00452273	0.0130788	0.0163399	0.0100334	0.00890168	0.00356957	0.0171387	0.0110515	0.0129306	0.0250215	0.0130304	0.0150628	0.0172303	0.0126153	0.00517495	0.00809261	0.00467788	0.0212868	0.0146651	0.000705103	0.00635051	0.0065139	0.00289535	0.017208	0.0050688	0.010195	0.00583342	0.0168718	0.00405239	0.0109669	0.00963309	0.0228762	0.023815	0.0120872	0.0149757	0.0210932	0.0168878	0.0172199	0.016281	0.0204954	0.0105639
0.0193712	0.00755555	0.010638	0.0151087	0.0228068	0.0346957	0.0118577	0.00763831	0.0226145	0.00431503	0.0130946	0.0162738	0.00960745	0.00867668	0.0036221	0.0169935	0.0107857	0.0130081	0.0247345	0.0129479	0.0153162	0.0171155	0.0123373	0.0053247	0.00762487	0.00428215	0.0210657	0.0145609	0.00129291	0.00677852	0.00640957	0.00242339	0.0167925	0.00579715	0.0100309	0.0056436	0.0172012	0.00462448	0.0105959	0.00931458	0.0228991	0.023318	0.011982	0.0152699	0.0212294	0.0171264	0.0170829	0.0161979	0.0209489	0.010739
0.019617	0.00794202	0.010993	0.0151804	0.023111	0.0341665	0.0114072	0.00746831	0.0228862	0.0041205	0.0130909	0.01619	0.00918048	0.00844869	0.00369628	0.0168366	0.0105309	0.0130792	0.0244261	0.0128485	0.0155611	0.0169792	0.012066	0.00548455	0.00715221	0.00388611	0.0208615	0.0144545	0.00193031	0.00722058	0.00642411	0.00195336	0.0163508	0.00655082	0.00986242	0.00545785	0.0175208	0.00519135	0.0102081	0.00899918	0.0228897	0.0228059	0.0118917	0.0155506	0.0213602	0.0173546	0.0169508	0.0161263	0.0213999	0.0109629
0.0198441	0.00833288	0.0113356	0.0152337	0.0233966	0.0336286	0.0109513	0.00729177	0.0231436	0.00394303	0.0130723	0.0160808	0.00874059	0.00822227	0.00378769	0.016666	0.0102912	0.0131338	0.0240935	0.012735	0.0157965	0.0168308	0.0118099	0.00565148	0.00666977	0.00351433	0.0206675	0.0143533	0.00258228	0.00767264	0.00654633	0.0014752	0.0158849	0.00732396	0.00969126	0.00526833	0.0178204	0.00574548	0.00981175	0.00868683	0.0228491	0.0222935	0.0118404	0.0158098	0.0214758	0.0175694	0.0168232	0.0160648	0.0218496	0.0112407
0.0200521	0.00872102	0.0116596	0.0152682	0.0236813	0.0330692	0.0104975	0.00710772	0.0233788	0.00377432	0.0130435	0.015957	0.00828531	0.00801381	0.00389302	0.0164724	0.0100648	0.0131893	0.023732	0.0126441	0.0160171	0.0166673	0.0115533	0.00584058	0.00618746	0.00318132	0.0204859	0.0142556	0.00323831	0.00814359	0.00676506	0.00100137	0.0154017	0.00812345	0.00952315	0.00508357	0.0181088	0.00629306	0.00939811	0.00838098	0.0227805	0.0217643	0.011806	0.0160503	0.0215855	0.0177807	0.0167004	0.0160194	0.0222574	0.011562
0.020236	0.00911414	0.011963	0.015296	0.0239684	0.0324879	0.0100491	0.00691051	0.0235882	0.00362774	0.0129992	0.0158121	0.00782351	0.0078175	0.00400928	0.0162659	0.00984383	0.0132415	0.0233425	0.0125746	0.0162273	0.0164911	0.0113097	0.00604138	0.00570214	0.00290089	0.0203137	0.0141516	0.00389507	0.00863162	0.00707882	0.000524147	0.0148958	0.00893403	0.0093506	0.00490444	0.0183777	0.00683499	0.00897525	0.00807692	0.022685	0.021221	0.0117851	0.0162769	0.0217034	0.0179785	0.016579	0.0159852	0.0226449	0.0119374
0.0204001	0.00949817	0.0122642	0.0153122	0.0242387	0.0319086	0.0096014	0.00670465	0.0237944	0.00350224	0.0129423	0.0156474	0.00734947	0.00763811	0.00412898	0.0160603	0.00962981	0.0132865	0.0229216	0.0125265	0.0164222	0.016296	0.0110925	0.00624897	0.00522538	0.0027107	0.0201519	0.0140437	0.0045415	0.00912295	0.00746552	9.69612e-05	0.0143808	0.00974345	0.00917383	0.00472467	0.0186225	0.0073639	0.00853752	0.00778428	0.0225515	0.0206689	0.0118144	0.0164963	0.0218216	0.0181676	0.0164787	0.015959	0.0230135	0.0123476
0.0205449	0.00988204	0.0125551	0.0153153	0.0244888	0.0313244	0.00916292	0.00649332	0.0239896	0.00339647	0.0128677	0.0154712	0.00688504	0.00747686	0.00424909	0.0158403	0.00942361	0.0133237	0.0224777	0.0124984	0.0166005	0.0160898	0.0109032	0.00647433	0.00475254	0.00262814	0.0200048	0.0139276	0.00520699	0.00962905	0.00791952	0.000442356	0.0138389	0.0105429	0.00899664	0.00454688	0.0188559	0.00788972	0.00809331	0.00750521	0.0223924	0.0201162	0.0118608	0.0167008	0.0219308	0.0183424	0.0163735	0.0159517	0.0233543	0.0127943
0.0206643	0.0102689	0.012837	0.0153055	0.0247207	0.0307299	0.00873273	0.00627477	0.0241431	0.00331305	0.0127806	0.0152771	0.00642011	0.00733582	0.00437155	0.0155825	0.00922749	0.0133496	0.0220144	0.0124928	0.0167647	0.0158667	0.0107378	0.00670384	0.00430467	0.00266964	0.0198746	0.0138252	0.00586629	0.0101372	0.00842424	0.000902986	0.0132693	0.0113344	0.00881745	0.00437493	0.0190689	0.00839729	0.00764063	0.00723904	0.0222081	0.0195501	0.011943	0.0168672	0.0220458	0.018508	0.016281	0.0159504	0.0236812	0.0132767
0.0207569	0.010638	0.0131043	0.015284	0.0249512	0.0301283	0.00831025	0.00604952	0.0242773	0.00326294	0.0126955	0.0150584	0.00594964	0.00721099	0.00449025	0.0153149	0.00904124	0.0133887	0.0215295	0.0125152	0.0169126	0.0156353	0.0105954	0.00694525	0.00389054	0.00284036	0.0197653	0.0137189	0.00649997	0.0106492	0.00896681	0.00136921	0.0127037	0.0121163	0.00864365	0.00420632	0.0192632	0.00888297	0.00717873	0.00699241	0.0219857	0.0189793	0.012053	0.0170227	0.0221497	0.0186584	0.0161979	0.0159584	0.0239844	0.0137857
0.0208269	0.010993	0.0133552	0.0152423	0.0251797	0.0295205	0.00790518	0.00582692	0.0243873	0.00323588	0.0125924	0.0148246	0.00548375	0.00710569	0.00460261	0.0150413	0.00885456	0.0134298	0.0210237	0.012562	0.0170596	0.0153948	0.0104774	0.00720618	0.0035294	0.00311921	0.0196752	0.0136007	0.00712746	0.011167	0.00953561	0.00182232	0.0121258	0.0128852	0.00846053	0.00403855	0.0194416	0.00935655	0.00671262	0.00676709	0.0217389	0.0184171	0.0121843	0.0171552	0.0222695	0.0187977	0.0161263	0.015979	0.0242608	0.0143221
0.0208741	0.0113356	0.0135935	0.0151901	0.0253877	0.028908	0.00752736	0.0056026	0.0244726	0.00323382	0.0124902	0.0145793	0.00503274	0.0070295	0.00471128	0.0147709	0.00867132	0.0134767	0.0204919	0.0126391	0.0171831	0.0151452	0.0103856	0.00747159	0.00321603	0.00348823	0.0196084	0.0134811	0.00773596	0.0116835	0.0101228	0.00227274	0.0115406	0.0136407	0.00828187	0.00387862	0.0195999	0.0098201	0.00624363	0.0065657	0.0214579	0.0178627	0.0123294	0.0172723	0.0224179	0.0189202	0.0160648	0.016004	0.0245111	0.0148754
0.0209013	0.0116596	0.0138172	0.0151319	0.0255788	0.0282961	0.00715933	0.00537882	0.0245364	0.00324564	0.0123841	0.0143213	0.0045908	0.00697606	0.00481653	0.0144923	0.00850689	0.0135233	0.019942	0.0127464	0.0172708	0.014886	0.010327	0.0077475	0.00302014	0.00393004	0.0195546	0.0133602	0.00834697	0.0122125	0.0107195	0.00271509	0.0109385	0.0143863	0.00809898	0.00372884	0.0197408	0.0102563	0.00577611	0.00638858	0.0211528	0.0173136	0.012509	0.0173691	0.0225378	0.0190445	0.0160194	0.0160432	0.0247418	0.0154532
0.0209024	0.011963	0.0140214	0.0150629	0.025742	0.027682	0.00681067	0.00515898	0.0245782	0.00328569	0.0122778	0.0140383	0.00417063	0.00694441	0.00491823	0.014208	0.00834583	0.0135707	0.0193783	0.0128981	0.0173537	0.0146151	0.0102944	0.00802963	0.00296445	0.00441652	0.0195224	0.0132356	0.00895406	0.0127358	0.0113312	0.00314575	0.010326	0.0151077	0.00791032	0.0035879	0.0198657	0.0106752	0.00529962	0.00624151	0.020824	0.0167689	0.0127159	0.0174558	0.0226614	0.0191515	0.0159852	0.016095	0.0249448	0.0160474
0.0208782	0.0122642	0.0142142	0.01498	0.0259104	0.027069	0.00647636	0.0049628	0.024599	0.00334659	0.0121683	0.0137438	0.00377666	0.00694223	0.00501126	0.0139249	0.00818948	0.0136241	0.0187936	0.0130857	0.0174254	0.0143451	0.010298	0.00834126	0.00303013	0.00493335	0.0195072	0.0131094	0.00955278	0.0132599	0.0119421	0.00357247	0.00970534	0.0158041	0.00772671	0.00345557	0.0199674	0.0110856	0.00484775	0.00612384	0.0204593	0.0162224	0.0129397	0.0175251	0.0227864	0.0192716	0.015959	0.0161471	0.025126	0.0166556
0.0208238	0.0125551	0.0143924	0.0148836	0.0260811	0.0264686	0.00616024	0.00478977	0.0245973	0.00342633	0.0120581	0.0134228	0.0034169	0.00696149	0.00509503	0.0136225	0.00805047	0.0136812	0.0181923	0.0133235	0.0174854	0.0140588	0.0103305	0.00866255	0.00321817	0.00548561	0.019511	0.0129618	0.0101466	0.0137881	0.0125462	0.00399081	0.00908077	0.0164825	0.00753919	0.00332894	0.0200513	0.0114798	0.00441492	0.00602775	0.0200755	0.0156843	0.0131857	0.0175763	0.0229028	0.0193564	0.0159517	0.0162124	0.0252826	0.0172688
0.020741	0.012837	0.0145456	0.0147814	0.0261913	0.0258767	0.00587941	0.00463988	0.0245704	0.00352891	0.0119509	0.0130938	0.00311015	0.00700165	0.00516826	0.0133221	0.00792129	0.013745	0.0175805	0.0135984	0.0175347	0.0137698	0.010396	0.00896592	0.00350615	0.00605006	0.0195246	0.012802	0.0107297	0.0143086	0.0131408	0.00438884	0.0084509	0.017136	0.00735424	0.00321296	0.0201176	0.0118514	0.0039983	0.00596284	0.0196734	0.0151671	0.0134464	0.0176104	0.0230232	0.0193878	0.0159504	0.0162858	0.0254135	0.0178916
0.0206335	0.0131043	0.0146934	0.0146648	0.0262958	0.0252961	0.00565633	0.0045182	0.0245229	0.0036432	0.0118471	0.012747	0.00286763	0.00706957	0.00523895	0.0130363	0.00778334	0.0138206	0.0169626	0.0139142	0.0175623	0.0134782	0.0104911	0.00927609	0.00388795	0.00662418	0.0195607	0.0126638	0.0113018	0.0148255	0.0137217	0.00477373	0.00782485	0.0177686	0.00716876	0.00311332	0.0201643	0.0122036	0.0036172	0.00593664	0.0192417	0.0146715	0.0137273	0.017633	0.0231672	0.0194212	0.0159584	0.0163583	0.0255242	0.0185107
0.0205096	0.0133552	0.0148231	0.0145408	0.0263801	0.0247211	0.00547663	0.00443294	0.0244481	0.00375306	0.0117463	0.0124013	0.00272652	0.00715941	0.00529064	0.0127481	0.00764221	0.0138999	0.0163341	0.0142655	0.0175693	0.0131892	0.0106174	0.00959351	0.00433951	0.00721971	0.0196079	0.0125191	0.0118607	0.0153465	0.0142923	0.00515222	0.00722015	0.0183835	0.00698236	0.00302256	0.0201914	0.0125316	0.00328847	0.00594472	0.0187995	0.0141939	0.0140147	0.017647	0.0233091	0.0194484	0.015979	0.0164328	0.0256105	0.0191342
0.0203727	0.0135935	0.0149389	0.0144181	0.026445	0.0241665	0.00532151	0.00437554	0.024352	0.00385512	0.011641	0.0120373	0.0026919	0.0072741	0.00533353	0.0124518	0.00751034	0.0139867	0.0156821	0.0146564	0.0175582	0.0129039	0.0107744	0.00991578	0.00484738	0.00781536	0.0196586	0.0123549	0.0124129	0.0158585	0.0148449	0.00551378	0.00663115	0.0189656	0.00679221	0.00294917	0.0201944	0.0128435	0.00304532	0.00598515	0.0183213	0.0137404	0.014315	0.0176472	0.023436	0.019473	0.016004	0.0165162	0.0256666	0.0197586
0.0201906	0.0138172	0.0150349	0.014283	0.026498	0.0236417	0.0052045	0.00436471	0.0242388	0.00401574	0.0115556	0.011637	0.00277497	0.00740077	0.0053715	0.0121667	0.00738977	0.0140842	0.0150266	0.0150895	0.0175297	0.0126153	0.0109456	0.0102359	0.00538277	0.0084092	0.019726	0.0121843	0.0129464	0.0163683	0.0153809	0.00586098	0.0060778	0.019512	0.00660249	0.00288253	0.0201818	0.0131356	0.00290676	0.00605502	0.0178003	0.0133154	0.0146309	0.0176337	0.0235635	0.0194857	0.0160432	0.0165979	0.0257053	0.0203825
0.0199799	0.0140214	0.0151087	0.0141336	0.0265399	0.0231495	0.00512356	0.00439023	0.024103	0.00418249	0.0114852	0.0112486	0.0029627	0.00754302	0.0054047	0.0118836	0.00728336	0.0141895	0.0143731	0.0155536	0.0174846	0.0123373	0.0111429	0.0105638	0.00594717	0.00900567	0.019815	0.0120076	0.0134671	0.016869	0.0158968	0.00619976	0.00555719	0.0200331	0.0064086	0.002841	0.0201514	0.0134	0.00288589	0.00615209	0.0172765	0.012924	0.0149563	0.0176034	0.023678	0.019496	0.016095	0.016684	0.0257196	0.0210058
0.0197561	0.0142142	0.0151804	0.0139808	0.026572	0.0226819	0.00508242	0.00445494	0.0239482	0.00434012	0.011429	0.0108604	0.00323539	0.00769708	0.00543392	0.0115947	0.00719151	0.0142995	0.0137166	0.0160622	0.0174204	0.012066	0.0113556	0.0108825	0.00652806	0.00959933	0.0199146	0.0118235	0.0139671	0.0173851	0.0164007	0.00652356	0.00507576	0.0205285	0.00621606	0.0028149	0.0201022	0.0136432	0.0029858	0.00627127	0.0167349	0.0125612	0.0152878	0.0175599	0.0237973	0.0194873	0.0161471	0.0167678	0.0257173	0.0216187
0.019514	0.0143924	0.0152337	0.0138186	0.0265855	0.022228	0.00507003	0.00456388	0.0237678	0.00449616	0.0113993	0.0104587	0.00356867	0.00786171	0.00545041	0.0113206	0.00711186	0.0144184	0.0130531	0.0165946	0.01733	0.0118099	0.0115902	0.0112091	0.00712592	0.0101922	0.0200208	0.0116265	0.0144596	0.0178985	0.0168781	0.00683338	0.00466808	0.0209864	0.00602474	0.0027995	0.0200295	0.0138622	0.0032055	0.00640792	0.0161706	0.0122327	0.0156142	0.0174967	0.0239195	0.0194724	0.0162124	0.0168542	0.0256904	0.0222198
0.0192514	0.0145456	0.0152682	0.0136533	0.0265847	0.0218031	0.00508543	0.00471408	0.0235725	0.00464823	0.0113761	0.0100334	0.00395342	0.0080429	0.00546467	0.0110515	0.00702926	0.0145492	0.0123901	0.0171521	0.0172303	0.0115533	0.0118361	0.0115354	0.00772895	0.0107835	0.0201323	0.0114242	0.014934	0.0183782	0.0173339	0.00713072	0.00433921	0.0214045	0.00583342	0.00279862	0.0199335	0.0140627	0.00351872	0.0065662	0.0156003	0.0119454	0.0159346	0.0174414	0.0240387	0.0194406	0.0162858	0.0169362	0.0256319	0.0228092
0.0189606	0.0146934	0.015296	0.0134902	0.0265802	0.0214085	0.00512753	0.00489877	0.0233513	0.00480139	0.0113732	0.00960745	0.00436931	0.00823006	0.00546653	0.0107857	0.00694781	0.0146838	0.0117267	0.0177386	0.0171155	0.0113097	0.0120977	0.0118561	0.0083356	0.011359	0.020233	0.0112127	0.015389	0.0188625	0.0177683	0.00740996	0.00411501	0.0218032	0.0056436	0.00280629	0.0198108	0.0142404	0.00389603	0.0067382	0.0150079	0.0116991	0.0162634	0.0173855	0.0241568	0.0194058	0.0163583	0.017017	0.0255503	0.0233962
0.0186523	0.0148231	0.0153122	0.0133191	0.0265514	0.0210435	0.00519222	0.00511313	0.0231132	0.00495453	0.0113834	0.00918048	0.00481074	0.00842885	0.00545847	0.0105309	0.00687232	0.0148267	0.0110673	0.0183748	0.0169792	0.0110925	0.0123676	0.0121716	0.00895011	0.0119328	0.0203405	0.0109975	0.0158316	0.0193314	0.0181686	0.00767949	0.00402024	0.0221726	0.00545785	0.00282996	0.019673	0.0143938	0.00433678	0.00691725	0.0144093	0.011497	0.0165891	0.0173221	0.0242909	0.0193554	0.0164328	0.017096	0.0254708	0.0239734
0.0183174	0.0149389	0.0153153	0.0131362	0.0264914	0.0207151	0.00527164	0.00535782	0.0228497	0.00510655	0.0114147	0.00874059	0.00526419	0.00863356	0.00544563	0.0102912	0.00680072	0.0149814	0.0104163	0.0190141	0.0168308	0.0109032	0.0126381	0.0124785	0.00955919	0.0125006	0.0204624	0.0107719	0.0162586	0.0197895	0.0185554	0.00792625	0.00404939	0.0224948	0.00526833	0.00286192	0.0195166	0.0145271	0.00481566	0.00711078	0.0138036	0.011337	0.0169113	0.0172488	0.0244217	0.0192891	0.0165162	0.0171746	0.0253712	0.0245353
0.0179664	0.0150349	0.0153055	0.0129506	0.026422	0.0204165	0.00536188	0.00562504	0.0225729	0.00524993	0.0114751	0.00828531	0.00572353	0.00884877	0.00543191	0.0100648	0.00673044	0.0151466	0.00976824	0.0196758	0.0166673	0.0107378	0.0129178	0.0127844	0.010176	0.0130568	0.0205785	0.0105366	0.0166728	0.0202391	0.0189035	0.00815809	0.00421052	0.0227838	0.00508357	0.00290612	0.0193378	0.0146325	0.0053276	0.00730081	0.0131863	0.0112262	0.0172345	0.0171692	0.0245552	0.0192206	0.0165979	0.0172506	0.0251998	0.0250877
0.0176006	0.0151087	0.015284	0.0127593	0.0263377	0.0201549	0.00546299	0.00591344	0.0222771	0.0053926	0.0115479	0.00782351	0.00618776	0.00907319	0.00540289	0.00984383	0.00667039	0.0153164	0.00913493	0.02036	0.0164911	0.0105954	0.0131878	0.0130811	0.0107826	0.0136027	0.0206983	0.0103053	0.0170725	0.020682	0.0192255	0.00837719	0.00447468	0.0230311	0.00490444	0.0029544	0.0191451	0.0147156	0.00585727	0.00749594	0.0125685	0.01116	0.0175497	0.0170815	0.024682	0.0191347	0.016684	0.0173258	0.0250151	0.0256306
0.0172173	0.0151804	0.0152423	0.0125601	0.0262458	0.0199258	0.00557448	0.00621325	0.0219883	0.0055239	0.011646	0.00734947	0.00665172	0.00928842	0.00537749	0.00962981	0.00661429	0.0154892	0.00851503	0.0210543	0.016296	0.0104774	0.013464	0.0133765	0.0113895	0.0141332	0.0208132	0.0100646	0.0174594	0.0211126	0.0195161	0.00857732	0.00482022	0.0232384	0.00472467	0.00301258	0.0189224	0.0147808	0.00639795	0.00768986	0.011938	0.0111462	0.0178718	0.0170082	0.0248013	0.019047	0.0167678	0.0174019	0.0248168	0.0261514
0.0168113	0.0152337	0.0151901	0.0123598	0.0261327	0.0197263	0.0056951	0.00652459	0.0216686	0.00565237	0.0117651	0.00688504	0.00710831	0.00948374	0.00534439	0.00942361	0.00656071	0.0156645	0.00791623	0.0217694	0.0160898	0.0103856	0.0137375	0.0136548	0.0119914	0.0146497	0.0209249	0.00981204	0.0178185	0.0215344	0.0197746	0.00876023	0.00523783	0.0234106	0.00454688	0.00307423	0.018692	0.0148212	0.00694781	0.0078822	0.0113045	0.0111711	0.0182059	0.016884	0.0249179	0.0189492	0.0168542	0.0174613	0.0246003	0.0266551
0.0163785	0.0152682	0.0151319	0.0121604	0.0260029	0.0195693	0.00582724	0.00684928	0.0212926	0.00577957	0.0119045	0.00642011	0.00755945	0.00966269	0.00530408	0.00922749	0.006505	0.015843	0.00734097	0.0224982	0.0158667	0.010327	0.014003	0.0139289	0.0125818	0.0151486	0.0210332	0.00955094	0.0181586	0.0219358	0.0200031	0.00891916	0.00569989	0.0235412	0.00437493	0.00314391	0.0184496	0.0148303	0.00750799	0.00808033	0.0106742	0.0112358	0.0185131	0.0167343	0.0250416	0.0188386	0.0169362	0.0175067	0.0243686	0.0271429
0.0159351	0.015296	0.0150629	0.0119688	0.025856	0.0194373	0.00596312	0.00718504	0.0209154	0.00589483	0.0120643	0.00594964	0.00800451	0.00984534	0.00526989	0.00904124	0.00644163	0.0160238	0.00680285	0.0232361	0.0156353	0.0102944	0.0142594	0.0141877	0.0131723	0.0156354	0.0211316	0.00928595	0.0184761	0.0223274	0.0201916	0.0090628	0.00619589	0.0236269	0.00420632	0.00321046	0.0181904	0.0148289	0.00806775	0.00826158	0.010068	0.01133	0.0188169	0.0166217	0.0251651	0.0187251	0.017017	0.0175442	0.0241192	0.0276097
0.0154804	0.0153122	0.01498	0.0117883	0.0257006	0.0193439	0.00608001	0.00751808	0.0205297	0.00600494	0.0122471	0.00548375	0.00844505	0.0100272	0.00523704	0.00885456	0.00638062	0.0162108	0.00630366	0.0239754	0.0153948	0.010298	0.0145137	0.0144412	0.0137465	0.0161032	0.0212153	0.00901152	0.0187773	0.0227107	0.0203556	0.00919142	0.00670499	0.0236777	0.00403855	0.0032828	0.0179214	0.0148047	0.00862979	0.00843887	0.00947859	0.0114559	0.0191155	0.0165056	0.0253035	0.0186053	0.017096	0.0175773	0.0238529	0.0280573
0.0150153	0.0153153	0.0148836	0.0115913	0.0255264	0.019276	0.00618865	0.00785341	0.0201388	0.00610921	0.0124497	0.00503274	0.00886838	0.0102048	0.00521167	0.00867132	0.0063133	0.0163967	0.00585577	0.0247302	0.0151452	0.0103305	0.014749	0.0146835	0.0143149	0.0165565	0.0212959	0.00873971	0.0190647	0.0230714	0.0204792	0.00930035	0.00723941	0.02369	0.00387862	0.00335737	0.017639	0.0147536	0.00918067	0.0086114	0.00889801	0.0116219	0.0193932	0.0163994	0.0254561	0.0184772	0.0171746	0.0176006	0.0235702	0.0284885
0.0145343	0.0153055	0.0147814	0.0113807	0.0253356	0.0192327	0.00629444	0.00817737	0.0197345	0.00620725	0.0126681	0.0045908	0.00927849	0.0103795	0.00517399	0.00850689	0.00624164	0.0165856	0.00546801	0.0254761	0.014886	0.010396	0.0149742	0.0149212	0.0148752	0.0170006	0.0213742	0.00846569	0.0193282	0.0234125	0.0205723	0.00939878	0.00778246	0.023655	0.00372884	0.00343095	0.0173458	0.0146886	0.00973434	0.00878099	0.00833958	0.0118204	0.0196668	0.0162911	0.0255501	0.0183406	0.0172506	0.0176147	0.0232724	0.0288928
0.0140343	0.015284	0.0146648	0.0111787	0.0251217	0.0192134	0.00639115	0.00850047	0.0193241	0.00629746	0.0128988	0.00417063	0.00967188	0.0105399	0.00513453	0.00834583	0.00616771	0.0167722	0.00514779	0.0262252	0.0146151	0.0104911	0.0151909	0.015146	0.0154269	0.0174268	0.0214345	0.00818463	0.0195727	0.0237428	0.0206314	0.00947651	0.00831525	0.0235804	0.0035879	0.00350721	0.0170488	0.0145884	0.0102775	0.00893186	0.00781055	0.0120332	0.0199303	0.0161839	0.0256329	0.0182035	0.0173258	0.0176197	0.0229641	0.0292666
0.0135314	0.0152423	0.0145408	0.0109822	0.024897	0.019218	0.00648899	0.00880806	0.018901	0.0063798	0.0131426	0.00377666	0.0100542	0.0106828	0.00509739	0.00818948	0.00608537	0.01696	0.00490082	0.0269804	0.0143451	0.0106174	0.0153888	0.0153786	0.0159593	0.0178553	0.0214995	0.00790744	0.0198026	0.024056	0.020656	0.00953591	0.00885566	0.0234747	0.00345557	0.00357889	0.0167443	0.0144779	0.0108115	0.00907146	0.00733033	0.0122667	0.0201832	0.0160762	0.0257187	0.018065	0.0174019	0.0176194	0.0226456	0.0296255
0.0130326	0.0151901	0.0144181	0.0107937	0.0246668	0.0192362	0.00656994	0.00912753	0.0184679	0.00645623	0.0133946	0.0034169	0.0104281	0.0108158	0.00507156	0.00805047	0.00599477	0.0171415	0.00473678	0.0277287	0.0140588	0.0107744	0.0155723	0.0156074	0.0164751	0.0182646	0.0215474	0.00762302	0.0200151	0.024348	0.0206427	0.00957713	0.00938963	0.0233299	0.00332894	0.00365504	0.0164274	0.0143503	0.0113454	0.0091979	0.00689068	0.0125043	0.0204271	0.0159748	0.0258028	0.0179112	0.0174613	0.0176057	0.0223116	0.0299803
0.0125274	0.0151319	0.014283	0.0106083	0.0244014	0.0192755	0.00663751	0.00945638	0.0180253	0.00652275	0.0136553	0.00311015	0.0107803	0.010939	0.0050438	0.00792129	0.00589804	0.0173171	0.00466718	0.0284782	0.0137698	0.0109456	0.0157421	0.0157707	0.0169759	0.0186343	0.021568	0.00734176	0.0202058	0.0246285	0.0206074	0.00960334	0.00990843	0.0231455	0.00321296	0.00372935	0.0161123	0.0141939	0.0118636	0.00930693	0.00651994	0.0127524	0.020655	0.0158809	0.0258884	0.0177541	0.0175067	0.0175847	0.0219588	0.0302964
0.0120158	0.0150629	0.0141336	0.0104297	0.0241233	0.0193239	0.00670018	0.0097691	0.0175754	0.00658929	0.0139223	0.00286763	0.0111088	0.0110453	0.0050071	0.00778334	0.00579072	0.0174943	0.00467884	0.0292188	0.0134782	0.0111429	0.0158854	0.0159182	0.0174691	0.0189888	0.0215585	0.00706027	0.0203734	0.0248799	0.020544	0.00961796	0.01042	0.0229241	0.00311332	0.00380217	0.0157968	0.0140299	0.0123644	0.00940574	0.00622412	0.013008	0.0208727	0.0157952	0.025971	0.017618	0.0175442	0.017554	0.0216015	0.0306016
0.0114948	0.01498	0.0139808	0.0102531	0.0238412	0.0193888	0.00674282	0.0100699	0.0171238	0.00663314	0.0141989	0.00272652	0.0114154	0.0111637	0.00497963	0.00764221	0.0056766	0.01766	0.00477212	0.0299452	0.0131892	0.0113556	0.0159987	0.0160554	0.0179473	0.0193211	0.0215276	0.00678525	0.0205245	0.0251238	0.0204375	0.00960452	0.0109157	0.0226612	0.00302256	0.00387303	0.0154732	0.0138431	0.0128713	0.00948584	0.00601465	0.0132626	0.0210825	0.0157039	0.0260469	0.0174827	0.0175773	0.0175156	0.0212405	0.0308805
0.0109644	0.0148836	0.0138186	0.0100824	0.0235478	0.0194606	0.00677767	0.0103657	0.0166687	0.00668138	0.0144736	0.0026919	0.0117055	0.0112695	0.00496458	0.00751034	0.00554373	0.0178265	0.00493679	0.0306593	0.0129039	0.0115902	0.0160903	0.016181	0.0184148	0.0196435	0.0214869	0.00652019	0.0206496	0.0253388	0.0203028	0.00958668	0.0113976	0.0223649	0.00294917	0.00395034	0.0151601	0.0136279	0.0133857	0.00955617	0.00588868	0.013522	0.0212707	0.0156225	0.0261199	0.0173529	0.0176006	0.017472	0.0208576	0.0311232
0.010431	0.0147814	0.0136533	0.00991831	0.0232446	0.0195311	0.0067989	0.0106555	0.0162074	0.00673665	0.0147547	0.00277497	0.0119791	0.0113443	0.0049598	0.00738977	0.00539969	0.0179866	0.0051575	0.0313648	0.0126153	0.0118361	0.0161702	0.0162978	0.0188667	0.0199455	0.021432	0.00624516	0.0207409	0.0255367	0.0201374	0.00954271	0.0118681	0.0220318	0.00288253	0.00402592	0.0148607	0.0134048	0.0138671	0.00960512	0.0058819	0.0137786	0.0214389	0.0155457	0.0261826	0.0172199	0.0176147	0.0174109	0.0204773	0.0313508
0.00990898	0.0146648	0.0134902	0.00976193	0.0229312	0.0196045	0.00681191	0.0109403	0.0157477	0.00676157	0.0150282	0.0029627	0.0122315	0.011412	0.00496153	0.00728336	0.00524786	0.0181409	0.00542462	0.0320573	0.0123373	0.0120977	0.0162366	0.0164057	0.0192962	0.0202287	0.0213594	0.00598915	0.0208092	0.0257162	0.0199463	0.0094721	0.01232	0.0216675	0.002841	0.00409875	0.0145625	0.0131548	0.0143433	0.00963119	0.00599631	0.0140225	0.0215981	0.0154662	0.026231	0.0170829	0.0176197	0.0173345	0.0200846	0.0315471
0.00938568	0.0145408	0.0133191	0.00961441	0.0226168	0.0196754	0.0068107	0.01122	0.0152903	0.00678236	0.0152994	0.00323539	0.0124672	0.0114606	0.00497364	0.00719151	0.00507741	0.0182914	0.00573408	0.0327507	0.012066	0.0123676	0.0162777	0.0164929	0.0197167	0.0204906	0.0212658	0.00575475	0.0208624	0.0258876	0.0197188	0.00939145	0.0127576	0.0212687	0.0028149	0.00416699	0.0142821	0.01289	0.014804	0.00964171	0.00619856	0.014259	0.0217431	0.0153979	0.0262742	0.0169508	0.0176194	0.0172596	0.019674	0.0317229
0.00886973	0.0144181	0.0131362	0.00948297	0.0222915	0.0197707	0.00679412	0.0114797	0.0148353	0.00679087	0.0155864	0.00356867	0.0126816	0.0114867	0.00499364	0.00711186	0.00488862	0.0184296	0.00605375	0.0334413	0.0118099	0.0126381	0.0162963	0.0165641	0.0201103	0.0207333	0.0211546	0.00552452	0.0208868	0.0260126	0.0194665	0.00929246	0.0131699	0.0208368	0.0027995	0.00423009	0.0140224	0.0126059	0.0152506	0.0096529	0.00648047	0.0144846	0.0218718	0.0153403	0.0263078	0.0168232	0.0176057	0.0171762	0.0192647	0.0318748
0.00836947	0.014283	0.0129506	0.00936068	0.0219535	0.0198543	0.0067626	0.011736	0.0143833	0.00679522	0.015866	0.00395342	0.0128729	0.0114974	0.00502587	0.00702926	0.00469006	0.0185575	0.00638738	0.034097	0.0115533	0.0129178	0.0162942	0.0166215	0.0204786	0.0209538	0.0210381	0.00531816	0.0208877	0.0260754	0.0191931	0.00917674	0.0135687	0.0203747	0.00279862	0.00428887	0.0137724	0.0123027	0.0156917	0.00964744	0.00681858	0.0146946	0.0219879	0.0152887	0.0263399	0.0167004	0.0175847	0.0170859	0.0188538	0.0320039
0.00788173	0.0141336	0.0127593	0.00924836	0.0216093	0.0199254	0.00671359	0.0119781	0.0139369	0.00679347	0.0161382	0.00436931	0.0130441	0.0114962	0.00506615	0.00694781	0.00448309	0.0186721	0.00672656	0.0347316	0.0113097	0.0131878	0.0162657	0.01666	0.0208335	0.0211483	0.0208917	0.00513285	0.0208696	0.0261383	0.0188923	0.009053	0.0139497	0.0198731	0.00280629	0.00434652	0.0135479	0.0119966	0.0161157	0.00961614	0.00721958	0.0148862	0.0220862	0.0152457	0.0263611	0.016579	0.017554	0.0169962	0.0184301	0.0321039
0.00741703	0.0139808	0.0125601	0.00915064	0.021255	0.0199876	0.00665234	0.0122112	0.0135053	0.00678228	0.0164074	0.00481074	0.0131957	0.0114734	0.00511597	0.00687232	0.00425758	0.0187898	0.00707683	0.0353474	0.0110925	0.013464	0.0162116	0.0166809	0.0211706	0.0213191	0.0207169	0.00496777	0.0208231	0.0261798	0.0185622	0.00891298	0.0143091	0.0193428	0.00282996	0.00440003	0.0133523	0.0116666	0.0165191	0.00957216	0.00766751	0.0150583	0.0221702	0.0152151	0.0263783	0.0164787	0.0175156	0.0168965	0.0180262	0.0321864
0.00697138	0.0138186	0.0123598	0.00906714	0.0208963	0.0200368	0.00658185	0.0124379	0.0130793	0.00676472	0.0166748	0.00526419	0.0133323	0.011445	0.00517639	0.00680072	0.00401634	0.0188963	0.00742995	0.0359477	0.0109032	0.0137375	0.0161391	0.0166837	0.0214852	0.0214701	0.0205199	0.0048351	0.020757	0.0262057	0.0182042	0.00874689	0.0146396	0.0187932	0.00286192	0.00447631	0.0131863	0.0113224	0.0169163	0.00951182	0.00815191	0.0152188	0.022237	0.0151871	0.0263858	0.0163735	0.017472	0.0167899	0.0176004	0.0322463
0.00655425	0.0136533	0.0121604	0.00899982	0.0205299	0.0200784	0.00650015	0.0126579	0.0126678	0.0067421	0.0169299	0.00572353	0.0134441	0.0114014	0.00524665	0.00673044	0.0037558	0.0189886	0.00777892	0.0365338	0.0107378	0.014003	0.0160342	0.0166714	0.0217808	0.0215949	0.0203005	0.00472799	0.0206592	0.0262058	0.0178302	0.00858156	0.0149427	0.0182185	0.00290612	0.0045474	0.0130518	0.0109669	0.017288	0.00943516	0.00866695	0.0153563	0.0223111	0.0151709	0.0263767	0.016281	0.0174109	0.0166805	0.0171535	0.0322716
0.00617144	0.0134902	0.0119688	0.00894317	0.0201638	0.0201092	0.0063979	0.0128585	0.0122732	0.0067142	0.0171742	0.00618776	0.0135337	0.0113372	0.00532817	0.00667039	0.00348548	0.0190662	0.00811621	0.0370999	0.0105954	0.0142594	0.0159179	0.0166361	0.0220535	0.0216922	0.0200604	0.0046498	0.0205372	0.0261775	0.0174372	0.0083932	0.0152275	0.0176146	0.0029544	0.00460247	0.0129494	0.0105959	0.0176519	0.00934114	0.00920791	0.0154712	0.0223635	0.0151597	0.0263551	0.0161979	0.0173345	0.0165781	0.0167358	0.0322763
0.005831	0.0133191	0.0117883	0.00890379	0.0197914	0.0201246	0.0062924	0.013051	0.0119039	0.00668046	0.0174106	0.00665172	0.0136096	0.0112607	0.00541935	0.00661429	0.0031981	0.0191314	0.00843457	0.0376386	0.0104774	0.0145137	0.015773	0.0165865	0.0223029	0.0217756	0.019797	0.00460231	0.0203943	0.0261278	0.0170282	0.00819095	0.0154842	0.0169902	0.00301258	0.00466848	0.0128865	0.0102081	0.0180048	0.00923021	0.00976341	0.0155567	0.0224152	0.0151527	0.0263289	0.0161263	0.0172596	0.0164764	0.0163214	0.0322697
0.00554467	0.0131362	0.0115913	0.00887053	0.0194127	0.0201214	0.00617681	0.0132318	0.0115399	0.00663627	0.017633	0.00710831	0.0136641	0.011172	0.00551892	0.00656071	0.00289816	0.0191838	0.00875172	0.0381544	0.0103856	0.014749	0.0156087	0.0165147	0.0225318	0.0218228	0.0195157	0.0045928	0.0202246	0.0260527	0.0165992	0.00798418	0.0157174	0.0163438	0.00307423	0.00473509	0.0128479	0.00981175	0.0183312	0.00910331	0.0103161	0.0156204	0.0224317	0.015133	0.0262926	0.0160648	0.0171762	0.0163791	0.0159003	0.0322395
0.00531056	0.0129506	0.0113807	0.00886511	0.0190307	0.0200955	0.00604315	0.0134023	0.0112018	0.00658641	0.0178467	0.00755945	0.0136998	0.0110655	0.00562709	0.006505	0.00258705	0.0192135	0.0090512	0.0386445	0.010327	0.0149742	0.0154186	0.0164271	0.0227414	0.0218499	0.019212	0.00461617	0.0200224	0.0259419	0.0161571	0.00776629	0.0159237	0.0156807	0.00314391	0.00480084	0.0128513	0.00939811	0.0186515	0.00896685	0.0108774	0.0156565	0.0223892	0.0151289	0.026255	0.0160194	0.0170859	0.0162815	0.0154767	0.0321912
0.0051459	0.0127593	0.0111787	0.00886571	0.0186413	0.0200552	0.00589797	0.0135688	0.0109048	0.00652892	0.0180462	0.00800451	0.013718	0.0109433	0.0057428	0.00644163	0.00226551	0.0192295	0.00934564	0.0391168	0.0102944	0.0151909	0.0151966	0.0163231	0.0229242	0.0218511	0.0188815	0.00466365	0.0197921	0.0258049	0.0157207	0.00754295	0.0161089	0.0150084	0.00321046	0.00487429	0.0128836	0.00897525	0.0189484	0.00880555	0.0114341	0.0156676	0.0223463	0.0151448	0.0262045	0.0159852	0.0169962	0.016193	0.0150574	0.0321118
0.00505234	0.0125601	0.0109822	0.00889716	0.0182497	0.0199946	0.00574017	0.0137237	0.0106252	0.00646419	0.0182317	0.00844505	0.0137106	0.0108111	0.0058665	0.00638062	0.00193559	0.0192443	0.00962818	0.0395633	0.010298	0.0153888	0.0149556	0.0162051	0.0230854	0.0218325	0.0185393	0.00474784	0.0195547	0.0256433	0.0152814	0.00730782	0.0162701	0.0143194	0.0032828	0.004945	0.0129447	0.00853752	0.01923	0.00862387	0.0119867	0.0156488	0.0222923	0.0151614	0.0261522	0.015959	0.0168965	0.0161112	0.0146406	0.0320109
0.00502595	0.0123598	0.0107937	0.00893021	0.0178533	0.0199125	0.00557777	0.0138679	0.0103859	0.00639044	0.0184032	0.00886838	0.0136811	0.0106641	0.00599741	0.0063133	0.0016012	0.0192726	0.00989008	0.0399612	0.0103305	0.0155723	0.0146865	0.0160604	0.0232195	0.0217837	0.018173	0.00486253	0.0193037	0.0254538	0.0148315	0.00707375	0.0164066	0.01363	0.00335737	0.00500996	0.0130672	0.00809331	0.0194889	0.00843422	0.0125376	0.0156052	0.0222351	0.0151728	0.0260832	0.0159517	0.0167899	0.0160322	0.0142258	0.0318902
0.00507353	0.0121604	0.0106083	0.00893675	0.0174573	0.0198182	0.00540502	0.0139963	0.0101763	0.00630727	0.0185625	0.00927849	0.0136382	0.0105075	0.00614388	0.00624164	0.00128534	0.0192777	0.0101384	0.04034	0.010396	0.0157421	0.0144034	0.0159009	0.0233282	0.0217142	0.0177811	0.00500028	0.019021	0.0252359	0.0143722	0.00683592	0.0165125	0.0129311	0.00343095	0.00508509	0.013224	0.00764063	0.0197324	0.00822861	0.0130743	0.0155374	0.0221576	0.0151847	0.0259761	0.0159504	0.0166805	0.0159739	0.013818	0.0317595
0.00518753	0.0119688	0.0104297	0.00897587	0.0170595	0.0197025	0.00522264	0.0141073	0.010015	0.00621848	0.0187065	0.00967188	0.0135807	0.0103326	0.00629716	0.00616771	0.00100788	0.0192746	0.0103745	0.0406907	0.0104911	0.0158854	0.0140968	0.0157213	0.0234119	0.0216165	0.0173742	0.00515781	0.0187204	0.0249827	0.0139172	0.00659594	0.0165931	0.012217	0.00350721	0.00515715	0.0134016	0.00717873	0.0199524	0.00801394	0.0136011	0.0154453	0.0220638	0.0152019	0.0258796	0.0159584	0.0165781	0.0159281	0.0134149	0.0316023
0.00536311	0.0117883	0.0102531	0.00902674	0.0166592	0.0195631	0.00502935	0.0142085	0.00988957	0.00611808	0.0188312	0.0100542	0.0135024	0.0101495	0.0064517	0.00608537	0.000835734	0.0192504	0.0106001	0.0410207	0.0106174	0.0159987	0.013772	0.0155344	0.0234731	0.0215154	0.0169438	0.00533262	0.0184048	0.0247131	0.0134799	0.00636258	0.0166452	0.0115091	0.00357889	0.00523555	0.0136196	0.00671262	0.0201551	0.00778057	0.0141122	0.015327	0.0219632	0.015215	0.0257782	0.015979	0.0164764	0.0159011	0.0130214	0.0314479
0.00558246	0.0115913	0.0100824	0.00909547	0.0162595	0.0194026	0.00483652	0.0143338	0.00978017	0.00601361	0.0189372	0.0104281	0.0134176	0.00995575	0.00661727	0.00599477	0.00085635	0.0192182	0.0108123	0.0413073	0.0107744	0.0160903	0.0134246	0.0153364	0.0235048	0.0213634	0.0164967	0.00552463	0.0180734	0.0244125	0.0130576	0.00613948	0.0166631	0.0108083	0.00365504	0.00531561	0.0138714	0.00624363	0.0203384	0.0075382	0.0146168	0.0151823	0.0218347	0.0152283	0.0256632	0.016004	0.0163791	0.0158899	0.0126452	0.0312942
0.00584193	0.0113807	0.00991831	0.00917833	0.0158647	0.0192283	0.00462984	0.0144445	0.00972012	0.005895	0.0190256	0.0107803	0.0133254	0.00976135	0.00679014	0.00589804	0.0010718	0.019188	0.0110129	0.0415655	0.0109456	0.0161702	0.0130566	0.0150933	0.0235075	0.0211418	0.0160315	0.0057312	0.0177243	0.0240899	0.0126588	0.00593105	0.0166578	0.010113	0.00372935	0.00539944	0.0141512	0.00577611	0.0205091	0.00728583	0.0151034	0.015007	0.0216937	0.0152381	0.0255392	0.0160432	0.0162815	0.0158918	0.0122771	0.0310776
0.00613547	0.0111787	0.00976193	0.00927525	0.0154733	0.0190432	0.00441781	0.0145226	0.00970774	0.00577974	0.0190963	0.0111088	0.0132128	0.00955727	0.00696966	0.00579072	0.00141398	0.0191355	0.0111935	0.0418065	0.0111429	0.0162366	0.0126712	0.0148416	0.0234881	0.0209264	0.0155573	0.00595456	0.0173462	0.0237429	0.0122822	0.00573505	0.016626	0.00943667	0.00380217	0.00548442	0.0144539	0.00529962	0.0206558	0.00702361	0.015575	0.0147998	0.0215442	0.0152521	0.0254065	0.016095	0.016193	0.015916	0.0119194	0.0308419
0.00645883	0.0109822	0.00961441	0.00937071	0.0150788	0.0188369	0.00420968	0.0145821	0.00973996	0.00565547	0.0191523	0.0114154	0.0130835	0.00936188	0.00714123	0.0056766	0.00182352	0.0190837	0.0113556	0.0420164	0.0113556	0.0162777	0.0122637	0.0145798	0.0234507	0.0206837	0.0150695	0.00616618	0.0169497	0.0233568	0.0119431	0.00555667	0.016568	0.00879361	0.00387303	0.00556685	0.0147861	0.00484775	0.0207962	0.00674637	0.0160273	0.0145676	0.0213733	0.0152676	0.0252615	0.0161471	0.0161112	0.015955	0.0115693	0.0305965
0.00680895	0.0107937	0.00948297	0.0094804	0.0146947	0.0186096	0.00398492	0.0146336	0.00980176	0.0055242	0.0191851	0.0117055	0.0129405	0.00913322	0.00732071	0.00554373	0.00226288	0.0190224	0.0115035	0.0421977	0.0115902	0.0162963	0.0118505	0.0143089	0.0233919	0.0204167	0.0145761	0.00637891	0.0165362	0.0229453	0.0116423	0.00540314	0.016484	0.00819427	0.00395034	0.00563689	0.0151358	0.00441492	0.0209386	0.00644683	0.0164594	0.0143044	0.0211968	0.015277	0.0251057	0.0162124	0.0160322	0.0160139	0.0112408	0.0303507
0.00717686	0.0106083	0.00936068	0.0095976	0.0143121	0.018363	0.0037652	0.0146744	0.00989457	0.00538245	0.0192051	0.0119791	0.0127978	0.00886447	0.00750357	0.00539969	0.00272686	0.0189576	0.0116382	0.0423492	0.0118361	0.0162942	0.0114192	0.0140208	0.0232971	0.0201291	0.0140651	0.00659882	0.0161079	0.022511	0.0113934	0.00528304	0.0163698	0.00765266	0.00402592	0.00571622	0.0155046	0.0039983	0.0210076	0.00614474	0.0168738	0.0140165	0.0209988	0.0152871	0.0249341	0.0162858	0.0159739	0.0160949	0.0109315	0.0300956
0.00755555	0.0104297	0.00924836	0.00971897	0.0139256	0.0180938	0.00354672	0.0147024	0.0100308	0.00523072	0.0192054	0.0122315	0.0126476	0.00861861	0.00768593	0.00524786	0.00320953	0.0188816	0.011758	0.0424725	0.0120977	0.0162657	0.0109648	0.0137138	0.0231869	0.0198147	0.0135486	0.00682929	0.0156534	0.0220576	0.0112011	0.00520127	0.0162218	0.00717893	0.00409875	0.0058086	0.0158949	0.0036172	0.0210459	0.00583076	0.0172726	0.0137133	0.0207834	0.0152963	0.024756	0.0163583	0.0159281	0.0162078	0.0106413	0.0298338
0.00794202	0.0102531	0.00915064	0.0098446	0.0135432	0.0178144	0.00334046	0.0147214	0.0102019	0.00507624	0.0191879	0.0124672	0.0124945	0.0083621	0.00786975	0.00507741	0.00370259	0.018802	0.0118716	0.0425895	0.0123676	0.0162116	0.0105024	0.0133979	0.0230536	0.0194736	0.013026	0.00705679	0.0151856	0.0215827	0.0110632	0.00515653	0.0160554	0.00678797	0.00416699	0.00590044	0.0162927	0.00328847	0.0210781	0.00550739	0.0176374	0.0133963	0.0205544	0.0152969	0.024573	0.0164328	0.0159011	0.0163431	0.0103687	0.0295635
0.00833288	0.0100824	0.00906714	0.00996773	0.0131633	0.0175471	0.00313875	0.0147262	0.010403	0.00491808	0.0191811	0.0126816	0.012339	0.00810766	0.00805199	0.00488862	0.00421964	0.01872	0.0119775	0.0426676	0.0126381	0.0161391	0.0100345	0.0130699	0.0228897	0.0191147	0.0125035	0.00727719	0.0147251	0.0210671	0.0109936	0.00515649	0.0158672	0.00650589	0.00423009	0.00598914	0.0167012	0.00304532	0.0210806	0.00517801	0.0179752	0.0130545	0.0203075	0.0152933	0.0243769	0.0165162	0.0158899	0.0164925	0.0101066	0.0292824
0.00872102	0.00991831	0.00899982	0.0101011	0.0127812	0.0172334	0.00295533	0.0147261	0.010629	0.00475279	0.0191216	0.0128729	0.0121653	0.00784645	0.00823101	0.00469006	0.004744	0.0186341	0.0120711	0.0426612	0.0129178	0.0160342	0.00955804	0.012725	0.0227098	0.0187237	0.011981	0.00749292	0.01426	0.0205225	0.0109765	0.00520716	0.0156502	0.0063525	0.00428887	0.00608112	0.0171219	0.00290676	0.0210695	0.00483436	0.0183073	0.0126867	0.020042	0.0152846	0.0241826	0.0165979	0.0158918	0.0166676	0.00986158	0.0289938
0.00911414	0.00976193	0.00894317	0.0102329	0.012399	0.0168807	0.00278765	0.0147105	0.0108852	0.00458087	0.0190235	0.0130441	0.0119997	0.00757959	0.00841576	0.00448309	0.00526995	0.0185411	0.0121588	0.0426354	0.0131878	0.0159179	0.0090807	0.0123653	0.0225074	0.0183108	0.0114655	0.00769996	0.0137838	0.0199768	0.011029	0.00530353	0.0154074	0.00634076	0.00434652	0.00616972	0.017544	0.00288589	0.0210397	0.00448814	0.0186148	0.0122949	0.0197735	0.0152716	0.0239774	0.016684	0.015916	0.0168648	0.00963348	0.0286997
0.00949817	0.00961441	0.00890379	0.010375	0.0120194	0.0165253	0.00264572	0.0146855	0.011168	0.00440633	0.0189137	0.0131957	0.0118315	0.00731572	0.00859441	0.00425758	0.00580595	0.0184408	0.0122422	0.0425951	0.013464	0.015773	0.00861022	0.0119921	0.022279	0.0178756	0.0109552	0.00790094	0.0133031	0.0194133	0.011152	0.00543366	0.0151441	0.00646537	0.00440003	0.00627011	0.017968	0.0029858	0.0209836	0.00414086	0.0188962	0.0118713	0.0194929	0.015251	0.023766	0.0167678	0.015955	0.0170965	0.00942855	0.0283983
0.00988204	0.00948297	0.00887053	0.0105091	0.0116398	0.0161537	0.0025277	0.0146482	0.0114727	0.00422272	0.0187844	0.0133323	0.0116674	0.00705856	0.00877019	0.00401634	0.00633966	0.0183411	0.0123233	0.042535	0.0137375	0.0156087	0.0081389	0.0116085	0.0220333	0.0174234	0.0104604	0.00808852	0.0128172	0.0188303	0.0113391	0.0056062	0.0148575	0.0067143	0.00447631	0.00640094	0.0183966	0.0032055	0.0209046	0.00379028	0.0191482	0.0114121	0.0191971	0.015234	0.0235522	0.0168542	0.0160139	0.0173568	0.00924504	0.0280958
0.0102689	0.00936068	0.00886511	0.0106519	0.0112642	0.0157669	0.00245543	0.0146008	0.0117885	0.00403181	0.0186336	0.0134441	0.0115076	0.00679465	0.00894182	0.0037558	0.00689353	0.0182387	0.012399	0.0424451	0.014003	0.0154186	0.0076791	0.0112168	0.0217726	0.0169499	0.00998634	0.00828406	0.0123323	0.0182301	0.0115939	0.00582101	0.0145438	0.00708438	0.0045474	0.00649401	0.0188226	0.00351872	0.0208085	0.00343354	0.0193687	0.0109303	0.0188943	0.0152088	0.0233319	0.0169362	0.0160949	0.0176335	0.00908566	0.0277984
0.010638	0.00924836	0.00886571	0.0107917	0.0108887	0.0153636	0.0024265	0.0145449	0.0121203	0.0038377	0.0184692	0.0135337	0.0113434	0.00652775	0.00910591	0.00348548	0.00746756	0.0181422	0.012468	0.042335	0.0142594	0.0151966	0.00723807	0.0108104	0.0214905	0.0164613	0.0095392	0.00846867	0.0118531	0.0176116	0.0119099	0.00607435	0.0142209	0.00755093	0.00460247	0.00656823	0.0192483	0.00389603	0.0206862	0.00308165	0.0195639	0.010435	0.018577	0.0151661	0.0231092	0.017017	0.0162078	0.0179168	0.00894565	0.0274963
0.010993	0.00915064	0.00889716	0.0109283	0.010518	0.0149614	0.00243852	0.0144736	0.0124671	0.00363844	0.0182902	0.0136096	0.0111736	0.0062695	0.00927567	0.0031981	0.00804582	0.0180451	0.0125364	0.042181	0.0145137	0.0149556	0.00681008	0.010395	0.0211896	0.0159518	0.00912721	0.0086383	0.0113671	0.0169748	0.012279	0.00636219	0.0138822	0.00810622	0.00466848	0.00664102	0.0196703	0.00433678	0.0205433	0.0027402	0.0197339	0.00992851	0.0182469	0.015113	0.0228912	0.017096	0.0163431	0.0182231	0.00883256	0.0271896
0.0113356	0.00906714	0.00893021	0.0110673	0.0101454	0.014541	0.00248269	0.0143965	0.0128129	0.00343338	0.0180888	0.0136641	0.0110192	0.00601362	0.00943067	0.00289816	0.00862344	0.0179484	0.012607	0.0420034	0.014749	0.0146865	0.00639561	0.00997515	0.0208834	0.0154247	0.00876048	0.00878598	0.0108807	0.016327	0.0126892	0.00667226	0.0135274	0.00872311	0.00473509	0.00671936	0.0200799	0.00481566	0.0203843	0.00240592	0.0198761	0.00939862	0.0178897	0.0150517	0.0226644	0.0171746	0.0164925	0.0185432	0.00873359	0.026886
0.0116596	0.00899982	0.00893675	0.0112047	0.00976472	0.014113	0.0025758	0.0143126	0.0131673	0.00322291	0.0178667	0.0136998	0.0108816	0.00576969	0.0095857	0.00258705	0.00920626	0.0178595	0.0126731	0.0418073	0.0149742	0.0144034	0.00602827	0.00955179	0.0205658	0.0148825	0.00844626	0.0089194	0.0103909	0.015666	0.0131416	0.0070003	0.013161	0.00937918	0.00480084	0.00680032	0.0204888	0.0053276	0.020194	0.00209228	0.0199942	0.00884927	0.017522	0.0149765	0.0224373	0.0172506	0.0166676	0.0188648	0.00863788	0.0265847
0.011963	0.00894317	0.00897587	0.0113301	0.00937863	0.0136675	0.002716	0.0142198	0.0135298	0.00301177	0.0176132	0.013718	0.0107586	0.00552922	0.00973494	0.00226551	0.00979032	0.0177658	0.0127405	0.0415833	0.0151909	0.0140968	0.00571529	0.00912463	0.0202299	0.0143162	0.00818597	0.00904273	0.00990347	0.0149871	0.0136332	0.0073444	0.0127878	0.0100805	0.00487429	0.00687518	0.0208869	0.00585727	0.0199764	0.00181831	0.0200911	0.00828258	0.0171622	0.0148896	0.0222076	0.0173258	0.0168648	0.0192106	0.00856138	0.0262818
0.0122642	0.00890379	0.00902674	0.0114629	0.00899507	0.0132138	0.00288131	0.0141182	0.0138927	0.00280002	0.0173421	0.0137106	0.0106508	0.00529668	0.00988266	0.00193559	0.0103751	0.017691	0.0128072	0.0413383	0.0153888	0.013772	0.00546591	0.00869454	0.0198777	0.0137368	0.00800316	0.00915615	0.00942157	0.0143072	0.0141559	0.00770395	0.0124129	0.0107935	0.004945	0.00694798	0.0212842	0.00639795	0.0197387	0.00161733	0.0201562	0.00770319	0.0167972	0.0147949	0.0219756	0.0174019	0.0170965	0.0195677	0.00850511	0.0259882
0.0125551	0.00887053	0.00909547	0.0115919	0.00861848	0.012763	0.00308401	0.0140076	0.0142626	0.00258408	0.0170554	0.0136811	0.010553	0.00508013	0.0100251	0.0016012	0.0109662	0.0176289	0.0128829	0.0410616	0.0155723	0.0134246	0.00529507	0.00827362	0.0195247	0.0131441	0.00790139	0.00925733	0.00894122	0.0136239	0.0146967	0.00807329	0.0120366	0.0115279	0.00500996	0.00701758	0.0216986	0.00694781	0.0194799	0.00151246	0.0202013	0.00711178	0.0164203	0.0146954	0.0217369	0.0174613	0.0173568	0.0199288	0.00846415	0.0256972
0.012837	0.00886511	0.00917833	0.0116861	0.00825125	0.0123094	0.00330595	0.0138956	0.014626	0.00237054	0.0167561	0.0136382	0.0104745	0.0048813	0.0101593	0.00128534	0.011565	0.0175346	0.012965	0.0407644	0.0157421	0.0130566	0.00520571	0.00785812	0.01916	0.0125477	0.00788294	0.00933792	0.00848793	0.0129377	0.0152581	0.00845778	0.0116601	0.0122848	0.00508509	0.0070859	0.0220585	0.00750799	0.0192057	0.00152983	0.020219	0.00650302	0.0160343	0.014568	0.0215024	0.0175067	0.0176335	0.0202993	0.00843231	0.0254138
0.0131043	0.00886571	0.00927525	0.0118003	0.0078893	0.0118577	0.00354052	0.0137673	0.0149787	0.00214408	0.0164383	0.0135807	0.0104121	0.00469467	0.0102951	0.00100788	0.0121738	0.0174416	0.013046	0.0404361	0.0158854	0.0126712	0.00521069	0.00743548	0.0187924	0.0119354	0.00795847	0.00940422	0.00806047	0.0122527	0.0158292	0.00884263	0.0112826	0.0130417	0.00515715	0.00714717	0.0223912	0.00806775	0.0189053	0.00167151	0.0202023	0.00587708	0.0156299	0.0144263	0.0212765	0.0175442	0.0179168	0.020677	0.00841315	0.0251308
0.0133552	0.00889716	0.00937071	0.0119248	0.00751733	0.0114072	0.00378953	0.0136319	0.0153399	0.00192533	0.016101	0.0135024	0.0103676	0.00452252	0.010423	0.000835734	0.0127882	0.0173555	0.0131417	0.0400952	0.0159987	0.0122637	0.00530379	0.00703798	0.0184249	0.0113292	0.00812147	0.00945744	0.00764733	0.011571	0.0164245	0.00923532	0.0109225	0.0138132	0.00523555	0.00721522	0.0227142	0.00862979	0.018587	0.00192352	0.0201676	0.00524516	0.0152237	0.0142907	0.0210447	0.0175773	0.0182231	0.0210604	0.00840121	0.0248586
0.0135935	0.00893021	0.0094804	0.0120419	0.00713371	0.0109513	0.00405429	0.0135132	0.015699	0.00170804	0.0157407	0.0134176	0.0103401	0.00436489	0.0105396	0.00085635	0.0134011	0.0172753	0.0132437	0.0397325	0.0160903	0.0118505	0.0054875	0.00666226	0.0180577	0.0106949	0.00835116	0.00949673	0.00726126	0.0108992	0.017046	0.00962381	0.0105738	0.014575	0.00531561	0.0072785	0.0230197	0.00918067	0.018256	0.00223285	0.0201074	0.0046015	0.0148065	0.0141407	0.020817	0.0176006	0.0185432	0.0214514	0.00839253	0.0245857
0.0138172	0.00893675	0.0095976	0.0121517	0.00674489	0.0104975	0.00432784	0.013371	0.0160507	0.0015056	0.0153693	0.0133254	0.0103379	0.00424121	0.0106546	0.0010718	0.0140039	0.0172065	0.0133498	0.0393526	0.0161702	0.0114192	0.00574206	0.00630129	0.0176952	0.0100437	0.00866874	0.00952596	0.0069042	0.0102462	0.0176603	0.0100047	0.0102418	0.0153073	0.00539944	0.00733483	0.0233156	0.00973434	0.0179081	0.00259889	0.0200287	0.00393897	0.0143844	0.0139858	0.0205811	0.0176147	0.0188648	0.0218406	0.00839435	0.0242985
0.0140214	0.00897587	0.00971897	0.0122561	0.00635747	0.0100491	0.00459502	0.0132148	0.0163941	0.00131371	0.014988	0.0132128	0.0103525	0.00415329	0.0107778	0.00141398	0.0146064	0.0171396	0.0134623	0.0389452	0.0162366	0.0109648	0.00607034	0.00597085	0.0173377	0.00941155	0.00907451	0.00954528	0.00658051	0.00960968	0.0182857	0.0103854	0.00993451	0.0160374	0.00548442	0.00738345	0.0235853	0.0102775	0.0175444	0.00298999	0.0199203	0.00327417	0.0139596	0.0138082	0.0203513	0.0176197	0.0192106	0.0222326	0.00839713	0.0240289
0.0142142	0.00902674	0.0098446	0.0123522	0.00597002	0.0096014	0.00485741	0.0130637	0.0167255	0.00113946	0.0145892	0.0130835	0.0103895	0.00408969	0.010897	0.00182352	0.0152094	0.0170822	0.0135816	0.0385242	0.0162777	0.0105024	0.00646574	0.00567692	0.0169859	0.00878482	0.0095357	0.00954827	0.00629904	0.00900286	0.0188998	0.0107597	0.00965664	0.0167604	0.00556685	0.00742816	0.0238414	0.0108115	0.0171633	0.00340189	0.0197896	0.00261177	0.0135245	0.0136235	0.0201256	0.0176194	0.0195677	0.0226224	0.00840263	0.0237745
0.0143924	0.00909547	0.00996773	0.0124339	0.00558442	0.00916292	0.00512949	0.0129053	0.017059	0.00100897	0.0141694	0.0129405	0.0104445	0.00403527	0.011011	0.00226288	0.0158105	0.0170297	0.0137118	0.0380862	0.0162963	0.0100345	0.00689762	0.00542279	0.016647	0.00814833	0.0100428	0.00952918	0.00606168	0.00842831	0.0195039	0.0111291	0.00942283	0.0174631	0.00563689	0.00747344	0.0240766	0.0113454	0.016764	0.00382311	0.0196355	0.00196081	0.0130775	0.0134237	0.0199057	0.0176057	0.0199288	0.0230079	0.00841075	0.023531
0.0145456	0.00917833	0.0101011	0.0125104	0.00519158	0.00873273	0.00540301	0.0127476	0.0173867	0.000931753	0.0137404	0.0127978	0.0105267	0.00402121	0.0111192	0.00272686	0.01641	0.0169801	0.0138512	0.0376268	0.0162942	0.00955804	0.0073598	0.00522083	0.016325	0.00751283	0.0105943	0.00950086	0.00588207	0.00790089	0.0201008	0.0114842	0.00923649	0.0181425	0.00571622	0.00752374	0.0242887	0.0118636	0.0163236	0.00425221	0.019455	0.0013548	0.0126323	0.0132106	0.0196876	0.0175847	0.0202993	0.0233857	0.00841658	0.0232936
0.0146934	0.00927525	0.0102329	0.0125796	0.00479282	0.00831025	0.00568121	0.0125923	0.0177024	0.000938694	0.0132977	0.0126476	0.0106371	0.00405117	0.0112172	0.00320953	0.0170069	0.0169301	0.0139958	0.0371528	0.0162657	0.0090807	0.00784777	0.00508416	0.0160202	0.00687123	0.0111917	0.00946804	0.00575984	0.00743568	0.0206905	0.0118345	0.00909622	0.0188035	0.0058086	0.00756425	0.0244816	0.0123644	0.0158793	0.0046827	0.0192546	0.000901035	0.0121924	0.0129925	0.0194708	0.017554	0.020677	0.0237577	0.00842785	0.0230577
0.0148231	0.00937071	0.010375	0.0126384	0.00440962	0.00790518	0.00595243	0.0124381	0.0180034	0.00102699	0.0128485	0.0124945	0.0107792	0.00411127	0.011312	0.00370259	0.0176087	0.016885	0.014149	0.0366779	0.0162116	0.00861022	0.00835491	0.00501316	0.0157376	0.00622504	0.0118279	0.00942323	0.00569819	0.0070376	0.0212698	0.0121693	0.00901886	0.0194365	0.00590044	0.00759467	0.0246523	0.0128713	0.015432	0.00512368	0.0190377	0.000912791	0.0117499	0.0127565	0.0192642	0.0175156	0.0210604	0.0241258	0.00842725	0.0228331
0.0149389	0.0094804	0.0105091	0.0126906	0.00403521	0.00752736	0.0062275	0.0122823	0.0182905	0.00117877	0.0123901	0.012339	0.0109366	0.00419876	0.0114	0.00421964	0.0182283	0.0168453	0.0143119	0.0361681	0.0161391	0.0081389	0.00887037	0.00501152	0.0154757	0.0055832	0.0124817	0.00936616	0.00569835	0.0067239	0.0218331	0.0124884	0.0090036	0.02005	0.00598914	0.00761483	0.0247978	0.0133857	0.0149713	0.0055633	0.0187991	0.0013764	0.0113117	0.012514	0.0190581	0.017472	0.0214514	0.0244896	0.00842096	0.0226118
0.0150349	0.0095976	0.0106519	0.0127279	0.00366518	0.00715933	0.00649791	0.0121274	0.018572	0.00136741	0.0118963	0.0121653	0.0111138	0.00430702	0.0114846	0.004744	0.0188344	0.0168164	0.01448	0.0356284	0.0160342	0.0076791	0.00939425	0.00507988	0.0152466	0.0049482	0.0131588	0.00929254	0.00575892	0.0065139	0.0223787	0.0127962	0.0090455	0.020643	0.00608112	0.00764449	0.0249232	0.0138671	0.0145048	0.00599715	0.0185364	0.00201101	0.0108759	0.0122532	0.0188634	0.0174109	0.0218406	0.0248497	0.00840867	0.022391
0.0151087	0.00971897	0.0107917	0.0127682	0.00329406	0.00681067	0.00676904	0.0119699	0.0188361	0.00158107	0.0114025	0.0119997	0.0113037	0.00443507	0.0115691	0.00526995	0.0194188	0.0167942	0.0146548	0.0350988	0.0159179	0.00723807	0.0099188	0.00521422	0.0150451	0.00432241	0.0138449	0.0092164	0.00588913	0.00640957	0.0229056	0.0131024	0.00915614	0.0212049	0.00616972	0.00766333	0.0250287	0.0143433	0.0140233	0.00642939	0.0182582	0.00269862	0.0104446	0.0119838	0.0186682	0.0173345	0.0222326	0.0252021	0.00838687	0.0221754
0.0151804	0.0098446	0.0109283	0.0127943	0.00292568	0.00647636	0.00703516	0.0118168	0.0190874	0.00181973	0.0109107	0.0118315	0.0115059	0.0045863	0.0116433	0.00580595	0.0199936	0.0167639	0.0148379	0.0345604	0.015773	0.00681008	0.0104464	0.00540317	0.0148793	0.00370771	0.0145504	0.0091229	0.00606911	0.00642411	0.0234078	0.0133887	0.00933231	0.0217393	0.00627011	0.00767977	0.0251088	0.014804	0.0135328	0.00686391	0.0179585	0.00339387	0.0100206	0.0117027	0.0184772	0.0172596	0.0226224	0.0255628	0.00836079	0.0219683
0.0152337	0.00996773	0.0110673	0.0128113	0.00256308	0.00616024	0.00729717	0.0116617	0.0193275	0.0020722	0.010406	0.0116674	0.0117237	0.00474805	0.011714	0.00633966	0.0205677	0.016728	0.0150239	0.0340179	0.0156087	0.00639561	0.010971	0.00565303	0.0147462	0.00311282	0.0152669	0.009023	0.00629907	0.00654633	0.0238947	0.0136618	0.00956248	0.0222402	0.00640094	0.00770942	0.0251648	0.0152506	0.0130252	0.00728635	0.0176388	0.00410107	0.0096097	0.0114074	0.0183042	0.0171762	0.0230079	0.0259019	0.00832479	0.0217637
0.0152682	0.0101011	0.0112047	0.0128268	0.00219249	0.00587941	0.0075506	0.0115121	0.0195508	0.00232688	0.009903	0.0115076	0.0119527	0.00491875	0.0117807	0.00689353	0.0211363	0.0166998	0.0152169	0.0334672	0.0154186	0.00602827	0.0114961	0.00595166	0.0146541	0.00253684	0.015989	0.00891027	0.00657534	0.00676506	0.0243641	0.0139191	0.00985325	0.022705	0.00649401	0.00771249	0.0251981	0.0156917	0.0125147	0.00770534	0.0173056	0.00480757	0.00920211	0.0111087	0.0181279	0.0170859	0.0233857	0.0262128	0.0082828	0.0215635
0.015296	0.0102329	0.0113301	0.0128261	0.00183475	0.00565633	0.00779883	0.0113602	0.019762	0.00259024	0.00939562	0.0113434	0.0121965	0.00510972	0.0118408	0.00746756	0.0216961	0.016683	0.0154137	0.0329074	0.0151966	0.00571529	0.0120002	0.00629012	0.0146049	0.00199835	0.0167129	0.00879455	0.00688195	0.00707882	0.0248023	0.0141619	0.0102002	0.0231304	0.00656823	0.0077162	0.0251957	0.0161157	0.0119983	0.0081111	0.0169539	0.00550485	0.00880996	0.0107891	0.0179552	0.0169962	0.0237577	0.0265213	0.00823131	0.0213672
0.0153122	0.010375	0.0114629	0.0128187	0.00150821	0.00547663	0.00804448	0.0112094	0.0199589	0.00286386	0.00888371	0.0111736	0.0124444	0.00531099	0.0119036	0.00804582	0.0222542	0.0166614	0.0156063	0.0323359	0.0149556	0.00546591	0.0125204	0.00665964	0.0146052	0.00152553	0.0174427	0.00868588	0.00722739	0.00746552	0.0252201	0.0144006	0.0105878	0.0235268	0.00664102	0.00772042	0.0251769	0.0165191	0.0114696	0.0085267	0.0165896	0.00621592	0.00843845	0.0104649	0.0177786	0.0168965	0.0241258	0.0268126	0.00816991	0.0211739
0.0153153	0.0105091	0.0115919	0.0127966	0.00123117	0.00532151	0.00827857	0.0110685	0.0201385	0.00314566	0.0083761	0.0110192	0.0127019	0.00551864	0.0119563	0.00862344	0.0227962	0.0166291	0.0158009	0.0317554	0.0146865	0.00529507	0.0130277	0.00705215	0.0146373	0.00118743	0.0181524	0.00857333	0.00759846	0.00791952	0.0256076	0.0145981	0.011023	0.0238879	0.00671936	0.00772988	0.0251333	0.0169163	0.0109443	0.00896267	0.0162177	0.00694436	0.00808379	0.0101344	0.0176179	0.0167899	0.0244896	0.0270869	0.00809534	0.0209885
0.0153055	0.0106519	0.0116861	0.0127678	0.00104679	0.0052045	0.0085042	0.010922	0.0203026	0.00342889	0.00787103	0.0108816	0.0129681	0.00572707	0.0120034	0.00920626	0.0233304	0.0165959	0.016001	0.0311703	0.0144034	0.00520571	0.013464	0.00746829	0.0147115	0.00106732	0.0188562	0.00845178	0.00798076	0.00842424	0.025972	0.0147703	0.0114877	0.0242097	0.00680032	0.00773908	0.0250668	0.017288	0.0104077	0.00935406	0.0158239	0.00765416	0.00774942	0.00979213	0.0174684	0.0166805	0.0248497	0.0273573	0.00800835	0.0208044
0.015284	0.0107917	0.0118003	0.0127291	0.00100984	0.00512356	0.00871991	0.0107837	0.0204512	0.0037023	0.00736946	0.0107586	0.0132305	0.00594035	0.0120471	0.00979032	0.023851	0.0165528	0.0161986	0.0305872	0.0140968	0.00521069	0.0138995	0.00789347	0.0148257	0.00123338	0.0195579	0.0083301	0.00837301	0.00896681	0.026309	0.0149304	0.0119893	0.0244896	0.00687518	0.00776098	0.0249818	0.0176519	0.0098697	0.0097409	0.0154129	0.00835615	0.00744901	0.00945039	0.0173296	0.0165781	0.0252021	0.0276109	0.00790988	0.0206196
0.0152423	0.0109283	0.0119248	0.012684	0.00113703	0.00508242	0.00892934	0.0106505	0.0205966	0.00398273	0.00687692	0.0106508	0.0134966	0.00614302	0.0120977	0.0103751	0.0243626	0.0165157	0.0163945	0.0299997	0.013772	0.00530379	0.0143226	0.0083285	0.0149752	0.00158744	0.0202422	0.00820968	0.00877672	0.00953561	0.0266157	0.0150835	0.012513	0.0247327	0.00694798	0.00778246	0.0248768	0.0180048	0.00933804	0.0101224	0.0149897	0.00904503	0.00718249	0.00908809	0.0171952	0.0164764	0.0255628	0.027849	0.00780128	0.0204413
0.0151901	0.0110673	0.0120419	0.012626	0.00138528	0.00507003	0.00914175	0.0105213	0.0207227	0.00426482	0.00640142	0.010553	0.0137879	0.00635325	0.0121471	0.0109662	0.0248564	0.0164691	0.0165959	0.0294108	0.0134246	0.0054875	0.0147259	0.00876494	0.0151731	0.00202875	0.0209142	0.0080882	0.00919401	0.0101228	0.0268893	0.0152183	0.0130599	0.0249371	0.00701758	0.00780332	0.0247555	0.0183312	0.00880386	0.0104999	0.0145595	0.00972104	0.00695527	0.00871486	0.0170545	0.0163791	0.0259019	0.0280706	0.00767937	0.0202567
0.0151319	0.0112047	0.0121517	0.0125546	0.00170896	0.00508543	0.0093588	0.0103919	0.020838	0.00454723	0.00594536	0.0104745	0.0140738	0.00656434	0.012178	0.011565	0.025331	0.0163999	0.0167902	0.0288199	0.0130566	0.00574206	0.0151184	0.00920932	0.0154085	0.00249633	0.0215729	0.00797897	0.0096212	0.0107195	0.02715	0.0153237	0.0136231	0.0251049	0.0070859	0.00782627	0.0245885	0.0186515	0.00826952	0.0108613	0.0141189	0.0103908	0.00676309	0.00834279	0.0169308	0.0162815	0.0262128	0.0282679	0.00754441	0.0200759
0.0150629	0.0113301	0.0122561	0.0124727	0.00207364	0.00512753	0.00955894	0.0102638	0.0209428	0.00482948	0.00552148	0.0104121	0.014353	0.0067648	0.0122059	0.0121738	0.0257896	0.016337	0.0169884	0.028234	0.0126712	0.00607034	0.0154888	0.00965061	0.0156702	0.00297497	0.0222078	0.00786528	0.010053	0.0113312	0.0273711	0.0154146	0.0141986	0.0252292	0.00714717	0.0078516	0.0244001	0.0189484	0.00774893	0.0112062	0.0136698	0.0110411	0.00661505	0.00797134	0.0168067	0.016193	0.0265213	0.0284512	0.0074033	0.0198952
0.01498	0.0114629	0.0123522	0.0123922	0.00246372	0.00519222	0.00974595	0.0101395	0.021008	0.0051121	0.00513368	0.0103676	0.0146237	0.00696314	0.0122264	0.0127882	0.0262268	0.0162785	0.0171946	0.0276403	0.0122637	0.00646574	0.0158375	0.0100917	0.0159722	0.00345543	0.0228396	0.00776888	0.0104821	0.0119421	0.0275881	0.0154787	0.0147745	0.0253307	0.00721522	0.00788726	0.0242062	0.01923	0.00724764	0.011545	0.0132134	0.0116838	0.00651812	0.00759133	0.0166874	0.0161112	0.0268126	0.0286162	0.00725027	0.0197109
0.0148836	0.0115919	0.0124339	0.0122944	0.00287363	0.00527164	0.00992857	0.0100282	0.0210424	0.00539449	0.00480561	0.0103401	0.0148879	0.00714884	0.0122503	0.0134011	0.0266493	0.0162073	0.0173846	0.0270489	0.0118505	0.00689762	0.0161619	0.010529	0.0163037	0.0039266	0.0234687	0.00768806	0.0108973	0.0125462	0.0277574	0.0155268	0.015365	0.0253622	0.0072785	0.007913	0.0239922	0.0194889	0.00674284	0.0118704	0.0127529	0.0123099	0.006466	0.00721081	0.0165738	0.0160322	0.0270869	0.0287592	0.00708674	0.0195303
0.0147814	0.0116861	0.0125104	0.0121886	0.00329471	0.00536188	0.0101036	0.00992167	0.0210583	0.00567554	0.00455243	0.0103379	0.0151523	0.0073306	0.0122698	0.0140039	0.027054	0.0161208	0.0175605	0.0264489	0.0114192	0.0073598	0.0164609	0.0109537	0.016651	0.00439038	0.0240571	0.00762619	0.0113025	0.0131408	0.0278598	0.0155416	0.0159633	0.0253199	0.00733483	0.00794997	0.023763	0.0197324	0.00626427	0.0121891	0.0122845	0.0129166	0.00646115	0.00683446	0.0164705	0.0159739	0.0273573	0.0288834	0.00690997	0.0193396
0.0146648	0.0118003	0.0125796	0.0120736	0.003724	0.00546299	0.0102732	0.00981469	0.0210654	0.00595473	0.00437532	0.0103525	0.0154089	0.00749645	0.0122879	0.0146064	0.0274368	0.0160209	0.0177345	0.0258502	0.0109648	0.00784777	0.0167362	0.0113748	0.0170229	0.00484391	0.0246191	0.00757404	0.0117105	0.0137217	0.0279453	0.0155188	0.0165573	0.0252576	0.00738345	0.00798937	0.0235236	0.0199524	0.00580585	0.0124865	0.0118196	0.0135046	0.00650186	0.00644845	0.0163668	0.0159281	0.0276109	0.0289905	0.00672155	0.019143
0.0145408	0.0119248	0.0126384	0.0119448	0.00415973	0.00557448	0.0104408	0.00971754	0.0210628	0.00623137	0.00429773	0.0103895	0.0156755	0.0076552	0.0122979	0.0152094	0.0278061	0.0159004	0.0178969	0.0252739	0.0105024	0.00835491	0.0169759	0.0117815	0.0174206	0.00528634	0.0251605	0.00754666	0.0121156	0.0142923	0.0280034	0.0154828	0.0171477	0.0251548	0.00742816	0.00803957	0.0232641	0.0201551	0.00537828	0.0127777	0.0113535	0.0140704	0.00659652	0.00607222	0.016266	0.0159011	0.027849	0.0290755	0.0065186	0.0189415
0.0144181	0.0120419	0.0126906	0.0118122	0.00461095	0.0056951	0.0105955	0.00961216	0.0210504	0.00650683	0.00431361	0.0104445	0.0159248	0.00780335	0.0122996	0.0158105	0.0281589	0.015784	0.0180557	0.0247007	0.0100345	0.00887037	0.0171855	0.0121765	0.0178226	0.00571047	0.0256795	0.00754195	0.0125094	0.0148449	0.0280499	0.0154312	0.0177278	0.0250185	0.00747344	0.00809417	0.0229911	0.0203384	0.00498963	0.0130562	0.0108801	0.0146163	0.00673515	0.00571245	0.0161731	0.0158899	0.0280706	0.0291426	0.0063041	0.0187475
0.014283	0.0121517	0.0127279	0.0116672	0.00507115	0.00582724	0.0107456	0.00951225	0.02102	0.00677667	0.00442716	0.0105267	0.0161565	0.00794419	0.01229	0.01641	0.0284957	0.0156605	0.0182063	0.0241381	0.00955804	0.00939425	0.0173701	0.0125587	0.0182299	0.00611054	0.0261699	0.00754768	0.0128973	0.0153809	0.0280529	0.0153604	0.0183099	0.0248372	0.00752374	0.00815066	0.0226973	0.0205091	0.00465926	0.0133059	0.0104078	0.0151407	0.00690738	0.00536333	0.016081	0.0158918	0.0282679	0.029192	0.00607795	0.0185432
0.0141336	0.0122561	0.0127682	0.0115202	0.0055347	0.00596312	0.0108919	0.00941481	0.0209587	0.00704065	0.00463501	0.0106371	0.0163863	0.00807501	0.0122767	0.0170069	0.0288063	0.0155219	0.0183463	0.0235704	0.0090807	0.0099188	0.0175427	0.0129216	0.0186559	0.00650033	0.0266359	0.00758466	0.013279	0.0158968	0.0280316	0.0152613	0.0188871	0.0246157	0.00756425	0.00821433	0.0223855	0.0206558	0.00438999	0.0135435	0.00993876	0.0156356	0.00711307	0.00503572	0.015992	0.015916	0.0284512	0.0292186	0.0058381	0.0183369
0.0139808	0.0123522	0.0127943	0.0113582	0.00600565	0.00608001	0.0110328	0.00931751	0.0208815	0.00730398	0.00492808	0.0107792	0.0166061	0.00819471	0.0122552	0.0176087	0.0291096	0.0153714	0.0184807	0.0230103	0.00861022	0.0104464	0.0176931	0.0132692	0.0190917	0.00687478	0.0270725	0.00764373	0.0136572	0.0164007	0.0279789	0.0151448	0.0194711	0.0243515	0.00759467	0.00828693	0.0220669	0.0207962	0.00418169	0.0137773	0.0094704	0.0161094	0.00734046	0.00472832	0.0159084	0.015955	0.0286162	0.0292285	0.00559309	0.0181263
0.0138186	0.0124339	0.0128113	0.0111903	0.00648198	0.00618865	0.0111535	0.00923572	0.0207853	0.00756329	0.00528776	0.0109366	0.0168233	0.00830684	0.0122234	0.0182283	0.0294091	0.015205	0.0186034	0.0224667	0.0081389	0.010971	0.017804	0.0136036	0.0195288	0.0072326	0.0274819	0.00772776	0.0140083	0.0168781	0.0278963	0.0150046	0.0200348	0.0240459	0.00761483	0.00836844	0.021729	0.0209386	0.00405925	0.013992	0.00900853	0.0165575	0.00759745	0.00445086	0.015827	0.0160139	0.0287592	0.0292127	0.00532841	0.017902
0.0136533	0.0125104	0.0128268	0.0110133	0.00697235	0.00629444	0.0112716	0.00914811	0.0206681	0.00781912	0.00569727	0.0111138	0.017038	0.00840356	0.0121875	0.0188344	0.0296577	0.0150214	0.0187129	0.021933	0.0076791	0.0114961	0.017897	0.013921	0.0199566	0.0075725	0.0278596	0.00783181	0.0143369	0.0173339	0.0277863	0.0148366	0.0205679	0.0237121	0.00764449	0.00844617	0.0213752	0.0210076	0.00401647	0.0141883	0.00856354	0.0169767	0.00787375	0.0042112	0.0157528	0.0160949	0.0288834	0.0291846	0.00505306	0.0176834
0.0134902	0.0125796	0.0128261	0.0108256	0.00746441	0.00639115	0.0113791	0.009056	0.0205442	0.00807008	0.00614239	0.0113037	0.017247	0.00849789	0.0121481	0.0194188	0.0298736	0.014819	0.0188165	0.021411	0.00723807	0.0120002	0.0179512	0.014217	0.0203797	0.00789448	0.0282141	0.00795495	0.014662	0.0177683	0.0276553	0.0146525	0.0210898	0.0233262	0.00766333	0.00852742	0.0210149	0.0210459	0.00407735	0.014366	0.00813275	0.0173695	0.00815732	0.00401496	0.0156805	0.0162078	0.0289905	0.029138	0.00476556	0.0174468
0.0133191	0.0126384	0.0128187	0.010629	0.00794388	0.00648899	0.0115001	0.00896502	0.0204025	0.00830865	0.00661447	0.0115059	0.0174417	0.00857719	0.012111	0.0199936	0.0300645	0.0145998	0.0189076	0.0208914	0.00681008	0.0125204	0.0179913	0.0144977	0.0208169	0.00820647	0.0285326	0.00809857	0.0149687	0.0181686	0.0274974	0.0144399	0.0215982	0.0228938	0.00767977	0.00861772	0.0206425	0.0210781	0.00421582	0.0145318	0.00771873	0.0177336	0.00845124	0.00387203	0.0156147	0.0163431	0.0290755	0.0290819	0.00446863	0.0171972
0.0131362	0.0126906	0.0127966	0.0104355	0.00842728	0.00656994	0.0116206	0.00887483	0.0202426	0.00854614	0.0071127	0.0117237	0.0176249	0.00864643	0.0120575	0.0205677	0.0302349	0.0143689	0.0189856	0.0203719	0.00639561	0.0130277	0.018001	0.0147591	0.0212672	0.00849361	0.0288147	0.00825917	0.0152591	0.0185554	0.0273082	0.0142072	0.022086	0.0224339	0.00770942	0.00871385	0.020258	0.0210806	0.00442936	0.014685	0.00731846	0.0180661	0.00875328	0.00379296	0.0155457	0.0164925	0.0291426	0.0289812	0.00416151	0.016952
0.0129506	0.0127279	0.0127678	0.0102293	0.00892393	0.00663751	0.0117108	0.0087858	0.0200671	0.00877462	0.00762795	0.0119527	0.0178027	0.00869916	0.0119961	0.0211363	0.0303817	0.0141278	0.0190518	0.0198658	0.00602827	0.013464	0.0179871	0.0149969	0.0216812	0.00875635	0.0290676	0.00843075	0.0155344	0.0189035	0.0270878	0.0139595	0.0225608	0.0219367	0.00771249	0.00881664	0.0198717	0.0210695	0.00470058	0.0148245	0.0069488	0.0183725	0.00905557	0.00378188	0.0154733	0.0166676	0.029192	0.0288261	0.00384025	0.0166991
0.0127593	0.0127682	0.0127291	0.0100183	0.0094233	0.00670018	0.0117911	0.0086984	0.019877	0.00899208	0.00816349	0.0121965	0.0179596	0.00873932	0.0119307	0.0216961	0.0305049	0.0138759	0.0191021	0.0193663	0.00571529	0.0138995	0.0179528	0.0152135	0.0220868	0.00900358	0.029287	0.00861848	0.015808	0.0192255	0.0268496	0.0136842	0.0230109	0.0214101	0.0077162	0.00892142	0.0194633	0.0210397	0.00501497	0.0149486	0.00660767	0.0186477	0.00935268	0.00383232	0.0154129	0.0168648	0.0292186	0.0286769	0.00350936	0.0164382
0.0125601	0.0127943	0.012684	0.00980853	0.00992372	0.00674282	0.0118634	0.00861455	0.0196681	0.00920666	0.00869989	0.0124444	0.0181103	0.00876457	0.0118674	0.0222542	0.0306105	0.0136101	0.0191429	0.0188773	0.00546591	0.0143226	0.0178986	0.015402	0.022487	0.00923909	0.029473	0.0088349	0.0160607	0.0195161	0.0265939	0.0134023	0.0234447	0.0208457	0.00772042	0.00902584	0.0190408	0.0209836	0.00537168	0.0150764	0.00630173	0.0189078	0.00965414	0.0039563	0.0153496	0.0170965	0.0292285	0.028514	0.00316836	0.0161725
0.0123598	0.0128113	0.012626	0.00958445	0.0104327	0.00677767	0.0119435	0.00853036	0.0194471	0.00941272	0.00924319	0.0127019	0.0182579	0.0087726	0.0117909	0.0227962	0.0306952	0.0133287	0.019173	0.0184018	0.00529507	0.0147259	0.0178119	0.0155748	0.0228654	0.00945359	0.029625	0.00908216	0.0162943	0.0197746	0.0263101	0.0130463	0.0238513	0.0202444	0.00772988	0.00914197	0.0186154	0.0209046	0.00575615	0.0151809	0.00603305	0.0191621	0.00994887	0.00413078	0.0152852	0.0173568	0.0292127	0.0283337	0.00282337	0.0159014
0.0121604	0.0128268	0.0125546	0.00936128	0.010942	0.0067989	0.0119983	0.00844862	0.0192128	0.00960852	0.00978861	0.0129681	0.0183945	0.00877298	0.0117115	0.0233304	0.0307542	0.0130333	0.0192014	0.0179394	0.00520571	0.0151184	0.0176734	0.0157228	0.0232291	0.00963909	0.0297441	0.00933854	0.0165183	0.0200031	0.0260036	0.0126479	0.0242342	0.0196042	0.00773908	0.00925838	0.0181862	0.0208085	0.00615722	0.0152263	0.00580999	0.0193429	0.0102299	0.00434323	0.0152248	0.0176335	0.0291846	0.02814	0.0024678	0.0156177
0.0119688	0.0128261	0.0124727	0.00913151	0.0114502	0.00681191	0.0120541	0.00836187	0.0189613	0.0097986	0.010325	0.0132305	0.0185287	0.00876623	0.0116291	0.023851	0.0307871	0.0127261	0.0192081	0.0174769	0.00521069	0.0154888	0.0175305	0.0158495	0.023577	0.00981414	0.0298143	0.00959494	0.0167239	0.0201916	0.0256762	0.0122686	0.0245897	0.0189369	0.00776098	0.00936736	0.0177492	0.0206862	0.00656581	0.0152653	0.00564269	0.019478	0.0104999	0.00460236	0.0151652	0.0179168	0.029138	0.0279315	0.00210421	0.0153377
0.0117883	0.0128187	0.0123922	0.00890003	0.0119592	0.0068107	0.0120997	0.00827039	0.0186967	0.00997873	0.0108619	0.0134966	0.0186636	0.00875255	0.0115625	0.0243626	0.030804	0.0124131	0.0192033	0.0170264	0.00530379	0.0158375	0.017371	0.0159569	0.0239084	0.00995404	0.0298597	0.00985149	0.0169205	0.0203556	0.0253346	0.0118708	0.0249199	0.0182429	0.00778246	0.00946757	0.0173038	0.0205433	0.00697583	0.0152979	0.00553476	0.0195896	0.010764	0.00489377	0.0151017	0.0182231	0.0290819	0.027696	0.00173312	0.0150449
0.0115913	0.0127966	0.0122944	0.00866586	0.0124676	0.00679412	0.0121524	0.00817492	0.018421	0.0101489	0.0113976	0.0137879	0.0188004	0.008728	0.0114652	0.0248564	0.0307961	0.0120865	0.01918	0.0165857	0.0054875	0.0161619	0.0171979	0.0160352	0.0242278	0.0100707	0.0298685	0.010119	0.0170983	0.0204792	0.0249656	0.0114474	0.0252304	0.0175178	0.00780332	0.00956971	0.01685	0.0203843	0.00738652	0.0153187	0.00548539	0.0196641	0.0110133	0.00521261	0.0150436	0.0185432	0.0289812	0.0274447	0.00136216	0.0147458
0.0113807	0.0127678	0.0121886	0.00842575	0.012971	0.0067626	0.0121948	0.00807682	0.018132	0.0103071	0.0119239	0.0140738	0.0188888	0.0086942	0.0113246	0.025331	0.0307639	0.0117482	0.0191485	0.0161311	0.00574206	0.0164609	0.0169971	0.0160839	0.0245259	0.0101722	0.029847	0.0103979	0.0172531	0.0205723	0.0245842	0.0110152	0.0255057	0.0167668	0.00782627	0.00968053	0.0163893	0.020194	0.00779773	0.015322	0.00548956	0.0196989	0.0112493	0.00555245	0.0149885	0.0188648	0.0288261	0.0271838	0.00100907	0.014447
0.0111787	0.0127291	0.0120736	0.00818169	0.0134713	0.00671359	0.0122194	0.00797211	0.0178344	0.0104551	0.0124397	0.014353	0.0189608	0.00864944	0.0111958	0.0257896	0.0307085	0.0113973	0.0191129	0.0156843	0.00607034	0.0167362	0.0167783	0.0161052	0.0247947	0.0102515	0.0297911	0.0106799	0.0174095	0.0206314	0.0241813	0.0105823	0.0257603	0.015984	0.0078516	0.009785	0.0159311	0.0199764	0.00819982	0.0153094	0.00555569	0.0197195	0.0114711	0.00590722	0.014934	0.0192106	0.0286769	0.0269094	0.000708509	0.014136
0.0109822	0.012684	0.0119448	0.00793375	0.0139678	0.00665234	0.0122408	0.00786849	0.0175164	0.0105927	0.0129494	0.0146237	0.019033	0.00859155	0.0110705	0.0262268	0.0306272	0.0110346	0.0190802	0.0152522	0.00646574	0.0169759	0.0165423	0.0160979	0.0250296	0.0103166	0.0297244	0.0109686	0.0175581	0.020656	0.0237791	0.010111	0.0259783	0.0151843	0.00788726	0.00988645	0.0154577	0.0197387	0.00858919	0.0152819	0.00567284	0.0197304	0.0116743	0.00627064	0.0148823	0.0195677	0.028514	0.0266138	0.000573295	0.0138268
0.0107937	0.012626	0.0118122	0.00768364	0.0144641	0.00658185	0.0122577	0.00776103	0.0171942	0.0107183	0.0134459	0.0148879	0.0190996	0.00852367	0.010951	0.0266493	0.0305207	0.0106571	0.0190235	0.0148225	0.00689762	0.0171855	0.0162787	0.0160688	0.0252467	0.010358	0.0296173	0.0112584	0.0176916	0.0206427	0.0233439	0.00961525	0.0261611	0.0143479	0.007913	0.00999633	0.0149822	0.0194799	0.00896965	0.0152404	0.00583585	0.0196954	0.0118623	0.00663968	0.0148364	0.0199288	0.0283337	0.0263113	0.000721147	0.0135032
0.0106083	0.0125546	0.0116672	0.00743538	0.0149507	0.00650015	0.0122658	0.00764768	0.0168737	0.0108358	0.0139342	0.0151523	0.0191659	0.00844196	0.0108199	0.027054	0.030394	0.0102802	0.0189173	0.0143987	0.0073598	0.0173701	0.0159906	0.0160202	0.0254393	0.0103687	0.0294246	0.0115428	0.0178132	0.0206074	0.0228894	0.00909653	0.0263195	0.0134818	0.00794997	0.0100966	0.0145116	0.0192057	0.00933069	0.0151839	0.00603783	0.01962	0.0120286	0.00700483	0.0147887	0.0202993	0.02814	0.0259987	0.00104776	0.0131894
0.0104297	0.0124727	0.0115202	0.00718385	0.0154321	0.0063979	0.0122621	0.00753911	0.0165356	0.0109383	0.0144087	0.0154089	0.0192294	0.00834763	0.0106867	0.0274368	0.0302493	0.00989152	0.0188161	0.0139849	0.00784777	0.0175427	0.0156906	0.015944	0.0256015	0.0103598	0.0292138	0.0118285	0.017924	0.020544	0.022447	0.00857344	0.0264383	0.012612	0.00798937	0.0101949	0.0140308	0.0189053	0.00967883	0.0151122	0.00627995	0.0195173	0.0121821	0.00737235	0.0147425	0.020677	0.0279315	0.0256644	0.0014407	0.0128653
0.0102531	0.0123922	0.0113582	0.00693377	0.0159122	0.0062924	0.0122599	0.00742654	0.0161969	0.0110218	0.0148626	0.0156755	0.0192989	0.00824968	0.0105493	0.0278061	0.0300816	0.009497	0.0187071	0.0135624	0.00835491	0.0176931	0.0153729	0.0158395	0.0257353	0.0103318	0.0289708	0.0121162	0.0180385	0.0204375	0.02199	0.00803186	0.0265232	0.0117223	0.00803957	0.010302	0.0135491	0.018587	0.010013	0.0150229	0.00655727	0.019391	0.0123169	0.00774362	0.0147012	0.0210604	0.027696	0.0253302	0.00186319	0.0125354
0.0100824	0.0122944	0.0111903	0.00668404	0.0163806	0.00617681	0.0122415	0.00731267	0.0158487	0.011098	0.0153053	0.0159248	0.0193585	0.00814155	0.0104105	0.0281589	0.0298893	0.00909769	0.0185966	0.0131429	0.00887037	0.017804	0.0150362	0.0157151	0.0258337	0.0102742	0.0287064	0.0123945	0.018141	0.0203028	0.0215282	0.00747596	0.0265829	0.0108271	0.00809417	0.0104034	0.0130659	0.018256	0.0103181	0.0149254	0.00685561	0.0192303	0.0124304	0.00811362	0.0146579	0.0214514	0.0274447	0.0249873	0.00229876	0.0122055
0.00991831	0.0121886	0.0110133	0.00643797	0.0168465	0.00604315	0.0122179	0.00719778	0.0154939	0.0111596	0.0157285	0.0161565	0.0194129	0.00802319	0.0102694	0.0284957	0.0296781	0.00869017	0.01848	0.0127233	0.00939425	0.017897	0.0146955	0.0155763	0.0259224	0.0101974	0.0284092	0.0126738	0.0182383	0.0201374	0.0210521	0.00691538	0.0266141	0.00992436	0.00815066	0.0104976	0.012579	0.0179081	0.0106159	0.0148249	0.00716235	0.0190387	0.0125253	0.00847208	0.014613	0.0218406	0.0271838	0.0246397	0.00274426	0.0118719
0.00976193	0.0120736	0.0108256	0.00619487	0.0172952	0.00589797	0.0121738	0.00709097	0.0151337	0.0112054	0.0161352	0.0163863	0.0194774	0.00789598	0.0101184	0.0288063	0.0294499	0.00827901	0.0183568	0.0123099	0.0099188	0.0179512	0.0143359	0.0154025	0.0259719	0.0100959	0.0280773	0.0129485	0.0183255	0.0199463	0.0205678	0.00633558	0.0266197	0.00900023	0.00821433	0.0105876	0.01209	0.0175444	0.0108873	0.0146938	0.00749323	0.0188223	0.0125995	0.00882397	0.0145738	0.0222326	0.0269094	0.0242849	0.00320043	0.0115386
0.00961441	0.0119448	0.010629	0.00594444	0.0177323	0.00574017	0.0121241	0.0069742	0.0147688	0.0112386	0.0165295	0.0166061	0.0195343	0.00775671	0.00996496	0.0291096	0.0292137	0.00785714	0.0182306	0.0118998	0.0104464	0.0179913	0.0139596	0.0152015	0.025994	0.00997414	0.0277138	0.0132175	0.0184304	0.0197188	0.0200792	0.00573807	0.0266066	0.0080877	0.00828693	0.010675	0.0115996	0.0171633	0.0111376	0.0145476	0.00782837	0.0185776	0.0126556	0.00917713	0.0145345	0.0226224	0.0266138	0.0239276	0.00365798	0.0112024
0.00948297	0.0118122	0.0104355	0.00569666	0.0181657	0.00557777	0.0120662	0.00683444	0.0143956	0.0112566	0.0168987	0.0168233	0.0195627	0.00760705	0.00980873	0.0294091	0.0289606	0.00743968	0.0180896	0.0114883	0.010971	0.018001	0.013574	0.0149783	0.0259812	0.00983576	0.0273156	0.0134794	0.018503	0.0194665	0.0195852	0.00512967	0.0265415	0.00717064	0.00836844	0.0107558	0.0111111	0.016764	0.011369	0.0143927	0.00816924	0.0183017	0.0126901	0.00951773	0.0144928	0.0230079	0.0263113	0.0235643	0.00411792	0.0108695
0.00936068	0.0116672	0.0102293	0.00545153	0.0185698	0.00540502	0.012021	0.00670016	0.0140209	0.0112582	0.0172462	0.017038	0.0195902	0.00745099	0.00965464	0.0296577	0.0286664	0.00703144	0.0179364	0.0110738	0.0114961	0.0179871	0.0131654	0.0147267	0.0259447	0.00967663	0.0268836	0.0137316	0.0185358	0.0191931	0.0190914	0.00451116	0.0264008	0.00626978	0.00844617	0.0108326	0.010612	0.0163236	0.0115672	0.014229	0.00851963	0.018008	0.0127091	0.00984785	0.0144522	0.0233857	0.0259987	0.0232036	0.00457746	0.0105309
0.00924836	0.0115202	0.0100183	0.00521043	0.0189564	0.00522264	0.0119645	0.00656564	0.0136481	0.0112437	0.0175694	0.017247	0.0196318	0.00727995	0.00949642	0.0298736	0.0283559	0.00662319	0.0177773	0.0106641	0.0120002	0.0179528	0.012751	0.0144477	0.0258845	0.00949355	0.0264171	0.0139749	0.018586	0.0188923	0.0186041	0.00388488	0.0262475	0.0054092	0.00852742	0.0109027	0.0101225	0.0158793	0.0117494	0.014041	0.00885599	0.0176875	0.0127026	0.0101732	0.0144125	0.0237577	0.0256644	0.0228434	0.00504624	0.0101951
0.00915064	0.0113582	0.00980853	0.00497266	0.0193496	0.00502935	0.0119206	0.00642745	0.0132723	0.0112184	0.0178743	0.0174417	0.0196916	0.00710458	0.00933328	0.0300645	0.0280368	0.00620686	0.0176129	0.010264	0.0125204	0.0178986	0.0123487	0.0141448	0.0258113	0.00928704	0.0259348	0.0142122	0.0186327	0.0185622	0.0181187	0.00324858	0.0260691	0.00460399	0.00861772	0.0109711	0.0096398	0.015432	0.0119103	0.01384	0.00920003	0.0173517	0.012683	0.0104944	0.0143756	0.0241258	0.0253302	0.0224829	0.00551642	0.00985052
0.00906714	0.0111903	0.00958445	0.00474039	0.0197273	0.00483652	0.011854	0.0062972	0.0128965	0.0111693	0.0181545	0.0176249	0.0197456	0.00692037	0.00917659	0.0302349	0.0277056	0.00579646	0.0174469	0.00985839	0.0130277	0.0178119	0.011943	0.0138165	0.0256913	0.00906768	0.0254167	0.0144347	0.0186858	0.0182042	0.0176378	0.00259994	0.0258628	0.00391989	0.00871385	0.0110393	0.00915614	0.0149713	0.0120354	0.0136306	0.00953069	0.0169958	0.0126478	0.0107961	0.0143399	0.0244896	0.0249873	0.0221177	0.00598216	0.00950074
0.00899982	0.0110133	0.00936128	0.00451323	0.0200921	0.00462984	0.0117349	0.00616249	0.0125261	0.0111109	0.0184074	0.0178027	0.0197992	0.00673138	0.00901253	0.0303817	0.027362	0.00539052	0.0172754	0.00946487	0.013464	0.0176734	0.0115396	0.0134683	0.0254878	0.00882842	0.0248714	0.0146498	0.0187336	0.0178302	0.0171511	0.00194994	0.0256245	0.00343886	0.00881664	0.0110996	0.00867595	0.0145048	0.0121252	0.0134231	0.00985768	0.0166212	0.0125888	0.0110844	0.0143103	0.0248497	0.0246397	0.0217521	0.00644788	0.00916145
0.00894317	0.0108256	0.00913151	0.00429008	0.0204469	0.00441781	0.0116171	0.00602473	0.0121549	0.0110411	0.0186397	0.0179596	0.0198435	0.00653491	0.00885102	0.0305049	0.0270009	0.00498861	0.0171008	0.00907869	0.0138995	0.0175305	0.0111278	0.0130997	0.0252745	0.00856624	0.0242903	0.0148492	0.0187804	0.0174372	0.0166684	0.00129119	0.0253552	0.00325556	0.00892142	0.011154	0.00819971	0.0140233	0.0121966	0.0131924	0.0101751	0.0162253	0.0125153	0.0113628	0.0142678	0.0252021	0.0242849	0.0214119	0.0069135	0.00883573
0.00890379	0.010629	0.00890003	0.00407446	0.020798	0.00420968	0.0114907	0.00588081	0.0117815	0.0109557	0.0188564	0.0181103	0.0198794	0.00632544	0.00869054	0.0306105	0.026622	0.00460233	0.0169223	0.00870585	0.0143226	0.017371	0.0107165	0.0127068	0.0250352	0.00828938	0.0236836	0.0150602	0.018823	0.0170282	0.0161988	0.000645286	0.0250579	0.0034213	0.00902584	0.011198	0.00772717	0.0135328	0.0122477	0.0129561	0.0104895	0.0158257	0.0124313	0.0116385	0.014227	0.0255628	0.0239276	0.021072	0.00738385	0.00850388
0.00887053	0.0104355	0.00866586	0.00385915	0.0211228	0.00398492	0.0113602	0.00573185	0.0114114	0.0108535	0.0190415	0.0182579	0.0199118	0.00611399	0.0085301	0.0306952	0.0262217	0.00422984	0.0167347	0.00835987	0.0147259	0.0171979	0.0103062	0.0122834	0.024773	0.00799021	0.0230425	0.0152608	0.0188661	0.0165992	0.0157379	5.54352e-05	0.0247262	0.0038959	0.00914197	0.0112394	0.00726313	0.0130252	0.0122786	0.0127048	0.010792	0.0154127	0.0123346	0.0119046	0.0141846	0.0259019	0.0235643	0.0207347	0.0078396	0.00817453
0.00886511	0.0102293	0.00842575	0.00365623	0.0214173	0.0037652	0.011214	0.00558031	0.0110468	0.0107384	0.0191951	0.0183945	0.0199414	0.00589701	0.00836739	0.0307542	0.0258107	0.00386847	0.0165446	0.00802615	0.0151184	0.0169971	0.00990715	0.0118414	0.0244864	0.00768232	0.0223711	0.0153944	0.01891	0.0161571	0.0152925	0.000712801	0.0243681	0.00458891	0.00925838	0.0112777	0.00680638	0.0125147	0.012278	0.0124188	0.011078	0.0149563	0.0122247	0.0121535	0.014141	0.0262128	0.0232036	0.0204072	0.00829235	0.00785328
0.00886571	0.0100183	0.00818169	0.00346292	0.0216971	0.00354672	0.0110736	0.00542306	0.0106896	0.0106163	0.0193363	0.0185287	0.0199769	0.00567419	0.00819693	0.0307871	0.0253916	0.00353158	0.0163569	0.00771723	0.0154888	0.0167783	0.00951528	0.0113723	0.0241643	0.00736163	0.0216731	0.0155251	0.0189533	0.0157207	0.014861	0.00136861	0.0239805	0.00541664	0.00936736	0.011312	0.00635738	0.0119983	0.0122487	0.012136	0.0113577	0.014505	0.0121015	0.0123985	0.0141104	0.0265213	0.0228434	0.0200883	0.00874481	0.00753427
0.00889716	0.00980853	0.00793375	0.00327271	0.0219581	0.00334046	0.0109288	0.0052669	0.0103383	0.0104641	0.0194445	0.0186636	0.020031	0.00544289	0.0080386	0.030804	0.0249631	0.00322429	0.0161919	0.00744055	0.0158375	0.0165423	0.00913281	0.0108739	0.0238159	0.00702145	0.0209509	0.0156529	0.0189929	0.0152814	0.0144445	0.00202669	0.0235611	0.00632655	0.00946757	0.0113497	0.00591719	0.0114696	0.012194	0.0118434	0.0116375	0.014054	0.0119649	0.012628	0.0140725	0.0268126	0.0224829	0.0197924	0.00918891	0.00721514
0.00893021	0.00958445	0.00768364	0.00311021	0.0222065	0.00313875	0.010771	0.00510776	0.00999904	0.0102871	0.0195273	0.0188004	0.0200781	0.00520746	0.00786145	0.0307961	0.0245235	0.00295143	0.0160252	0.00720346	0.0161619	0.0162787	0.00876835	0.0103734	0.0234358	0.00667498	0.0202148	0.0157746	0.0190166	0.0148315	0.0140441	0.00267446	0.0231082	0.0072912	0.00956971	0.0113817	0.0054825	0.0109443	0.0121035	0.0115465	0.0119087	0.0135974	0.0118248	0.0128468	0.0140428	0.0270869	0.0221177	0.0195079	0.00962588	0.00689859
0.00893675	0.00936128	0.00743538	0.00296898	0.0224359	0.00295533	0.0105985	0.00495127	0.00967053	0.0100988	0.0195828	0.0188888	0.0201046	0.00497767	0.00768855	0.0307639	0.0240795	0.0027117	0.0158571	0.00702732	0.0164609	0.0159906	0.00842514	0.00984288	0.0230272	0.00631883	0.0194549	0.0158768	0.0190356	0.0143722	0.0136631	0.00332917	0.022638	0.00828577	0.00968053	0.0114036	0.00506894	0.0104077	0.0119819	0.0112463	0.0121484	0.0131395	0.0116818	0.0130546	0.014012	0.0273573	0.0217521	0.0192369	0.0100554	0.00658359
0.00897587	0.00913151	0.00718385	0.00283471	0.0226533	0.00278765	0.0104138	0.00479228	0.00934863	0.00989748	0.0196071	0.0189608	0.0201416	0.00475048	0.0075316	0.0307085	0.0236334	0.00252072	0.0156975	0.00690391	0.0167362	0.0156906	0.00810656	0.00928184	0.0225944	0.00595224	0.0186704	0.0159637	0.0190596	0.0139172	0.0132977	0.00398316	0.0221463	0.00930249	0.009785	0.011412	0.00466578	0.0098697	0.0118367	0.0109473	0.0123833	0.0126837	0.0115318	0.0132395	0.0139811	0.0276109	0.0214119	0.0189763	0.0104733	0.00627108
0.00902674	0.00890003	0.00693377	0.00271185	0.0228489	0.00264572	0.0102151	0.00463188	0.00903725	0.00968578	0.0195986	0.019033	0.0201998	0.00450725	0.00737462	0.0306272	0.0231819	0.0023838	0.0155471	0.00685213	0.0169759	0.0153729	0.00781387	0.00870664	0.0221305	0.00557907	0.0178681	0.0160417	0.0190819	0.0134799	0.0129472	0.00463471	0.0216298	0.0103242	0.00988645	0.0114209	0.0042858	0.00933804	0.0116648	0.0106321	0.0126063	0.0122262	0.0113755	0.0134156	0.013946	0.027849	0.021072	0.0187347	0.0108858	0.0059624
0.00909547	0.00866586	0.00668404	0.00261878	0.0230292	0.0025277	0.0100017	0.00447316	0.00873478	0.00946495	0.0195627	0.0190996	0.0202703	0.00426607	0.00721341	0.0305207	0.0227177	0.00229706	0.015392	0.00687083	0.0171855	0.0150362	0.007552	0.00811585	0.0216383	0.0051981	0.0170389	0.0161056	0.0190979	0.0130576	0.0126289	0.00528953	0.021081	0.0113502	0.00999633	0.0114153	0.00392244	0.00880386	0.0114708	0.010312	0.0128031	0.011783	0.0112278	0.0135744	0.0139102	0.0280706	0.0207347	0.0185018	0.0112864	0.00565148
0.00917833	0.00842575	0.00643797	0.00254025	0.0231921	0.00245543	0.00978008	0.00431288	0.00844167	0.0092303	0.019506	0.0191659	0.0203337	0.00403257	0.00704963	0.030394	0.0222528	0.00226876	0.0152372	0.00696068	0.0173701	0.0146955	0.00731931	0.00750463	0.0211242	0.0048101	0.0161741	0.016159	0.019103	0.0126588	0.0123301	0.00594311	0.0205139	0.0123769	0.0100966	0.0114034	0.00357177	0.00826952	0.0112536	0.00998571	0.0129821	0.0113511	0.0110763	0.0137196	0.0138726	0.0282679	0.0204072	0.0182852	0.0116739	0.00534439
0.00927525	0.00818169	0.00619487	0.00247941	0.0233393	0.0024265	0.00954938	0.0041575	0.00816253	0.00897946	0.0194238	0.0192294	0.0203959	0.00380221	0.00689045	0.0302493	0.0217935	0.00229989	0.015109	0.00713327	0.0175427	0.0143359	0.00712357	0.00687727	0.0205797	0.00441635	0.0153196	0.0161986	0.0190995	0.0122822	0.0120481	0.00659795	0.019929	0.0133981	0.0101949	0.0113922	0.00323696	0.00774893	0.011004	0.00965319	0.0131664	0.010932	0.0109241	0.0138659	0.0138343	0.0284512	0.0200883	0.018085	0.0120531	0.005042
0.00937071	0.00793375	0.00594444	0.00244621	0.0234656	0.00243852	0.00931201	0.00400978	0.00788783	0.00871046	0.0193148	0.0192989	0.0204658	0.00358106	0.00673036	0.0300816	0.0213379	0.00237955	0.0149957	0.00738369	0.0176931	0.0139596	0.00696666	0.00622955	0.0200026	0.00402602	0.0144598	0.0162265	0.0190948	0.0119431	0.0117885	0.00724527	0.0193284	0.0144195	0.010302	0.0113682	0.00292539	0.00724764	0.0107368	0.00932713	0.0133439	0.0105378	0.0107779	0.0139804	0.0138049	0.0286162	0.0197924	0.0179015	0.0124321	0.00474005
0.0094804	0.00768364	0.00569666	0.00242456	0.0235757	0.00248269	0.00907729	0.00386663	0.00762579	0.00843187	0.0191806	0.0193585	0.0205488	0.00337108	0.00657247	0.0298893	0.0208834	0.00249845	0.0148998	0.00771221	0.017804	0.013574	0.00685183	0.00555605	0.0194099	0.00363405	0.0135966	0.016233	0.0190758	0.0116423	0.0115405	0.00787329	0.0187036	0.0154248	0.0104034	0.0113418	0.00262855	0.00674284	0.010446	0.00900405	0.0135087	0.0101607	0.0106512	0.0140849	0.0137706	0.0287592	0.0195079	0.0177348	0.0128178	0.00444324
0.0095976	0.00743538	0.00545153	0.00242191	0.0236696	0.0025758	0.00885216	0.00373295	0.0073716	0.00814481	0.019019	0.0194129	0.020627	0.00317803	0.00641405	0.0296781	0.0204445	0.00263259	0.0148128	0.00811275	0.017897	0.0131654	0.00677658	0.00487008	0.0187932	0.00324801	0.0127395	0.0162294	0.0190578	0.0113934	0.0113122	0.00849869	0.0180617	0.0164275	0.0104976	0.0113105	0.00235083	0.00626427	0.0101336	0.00866929	0.0136564	0.00981774	0.0105412	0.0141863	0.0137373	0.0288834	0.0192369	0.0175792	0.0131678	0.00414483
0.00971897	0.00718385	0.00521043	0.00244213	0.0237406	0.002716	0.00861012	0.00362199	0.00712429	0.00784057	0.0188243	0.0194774	0.0206999	0.00299836	0.00626332	0.0294499	0.0200201	0.0027792	0.0147419	0.00858047	0.0179512	0.012751	0.00673636	0.00417858	0.0181478	0.00286856	0.0118812	0.016212	0.0190242	0.0112011	0.0111088	0.00911461	0.017401	0.0174147	0.0105876	0.0112696	0.00210448	0.00580585	0.00980435	0.00834558	0.0137902	0.00951336	0.0104462	0.0142712	0.0137142	0.0289905	0.0189763	0.0174566	0.0135048	0.00384641
0.0098446	0.00693377	0.00497266	0.00248372	0.023795	0.00288131	0.00835016	0.00353065	0.00689794	0.00753129	0.0186075	0.0195343	0.0207665	0.0028538	0.00610704	0.0292137	0.0195984	0.00293632	0.0146825	0.00909718	0.0179913	0.0123487	0.00673291	0.00347185	0.0174897	0.00250585	0.0110394	0.0161912	0.0189928	0.0110632	0.0109202	0.00971238	0.0167454	0.0183926	0.010675	0.0112174	0.0018879	0.00537828	0.00944424	0.00802552	0.0139094	0.0092522	0.0103663	0.0143638	0.013693	0.0290755	0.0187347	0.0173461	0.0138387	0.00355222
0.00996773	0.00668404	0.00474039	0.00254231	0.0238284	0.00308401	0.00808127	0.00346387	0.0066971	0.00720671	0.0183641	0.0195627	0.0208358	0.00274119	0.00594695	0.0289606	0.019183	0.0030975	0.0146425	0.00966922	0.018001	0.011943	0.00676137	0.00274787	0.0167985	0.00216937	0.0102201	0.0161582	0.0189514	0.0109936	0.0107458	0.0103016	0.0160579	0.0193458	0.0107558	0.0111659	0.00170477	0.00498963	0.00906572	0.00771057	0.0140167	0.00903347	0.0103123	0.0144385	0.0136789	0.0291426	0.0185018	0.0172435	0.0141648	0.00325586
0.0101011	0.00643797	0.00451323	0.00261116	0.0238445	0.00330595	0.00780979	0.00341931	0.00649545	0.00687638	0.0180995	0.0195902	0.0208969	0.00266412	0.00578343	0.0286664	0.0187757	0.00325408	0.0146178	0.0102865	0.0179871	0.0115396	0.00682147	0.00201944	0.0160906	0.00186909	0.00943742	0.0161075	0.0188752	0.0109765	0.0106	0.0108799	0.0153464	0.0202728	0.0108326	0.0111014	0.00156345	0.00465926	0.00866718	0.00741503	0.014109	0.00887275	0.0102818	0.0144964	0.0136757	0.029192	0.0182852	0.0171506	0.0144769	0.00296912
0.0102329	0.00619487	0.00429008	0.00267944	0.0238466	0.00354052	0.00753062	0.00340993	0.00629611	0.00654474	0.0178087	0.0196318	0.0209571	0.00263128	0.00562332	0.0283559	0.0183827	0.00341656	0.0145959	0.0109467	0.0179528	0.0111278	0.00691389	0.00131133	0.0153621	0.00162691	0.00871086	0.0160394	0.0188085	0.011029	0.0104672	0.0114496	0.0146481	0.0211832	0.0109027	0.011043	0.00145596	0.00438999	0.00825204	0.00713318	0.0141906	0.00876174	0.0102718	0.0145448	0.013672	0.0292186	0.018085	0.0170778	0.014776	0.00267375
0.010375	0.00594444	0.00407446	0.00275074	0.0238274	0.00378953	0.00725234	0.00343518	0.00610026	0.00618903	0.0174934	0.0196916	0.021023	0.00264381	0.00547384	0.0280368	0.0180148	0.00356737	0.0145911	0.0116451	0.0178986	0.0107165	0.00702757	0.000708472	0.0146287	0.00146143	0.00806377	0.0159693	0.0187388	0.011152	0.0103543	0.0120085	0.0139405	0.0220709	0.0109711	0.0109775	0.00139823	0.00418169	0.00781686	0.00686525	0.0142578	0.0087178	0.0102975	0.0145827	0.0136617	0.0292285	0.0179015	0.0170129	0.0150691	0.0023792
0.0105091	0.00569666	0.00385915	0.00283711	0.0237913	0.00405429	0.00696051	0.00350699	0.00589823	0.00583474	0.0171615	0.0197456	0.0210822	0.00270807	0.00532283	0.0277056	0.0176668	0.00370395	0.0146035	0.01237	0.0178119	0.0103062	0.0071583	0.000697911	0.0138591	0.00142039	0.00751709	0.0158818	0.0186674	0.0113391	0.0102585	0.0125532	0.0132242	0.0229421	0.0110393	0.0108973	0.00138775	0.00405925	0.00736407	0.00659997	0.0143079	0.00873547	0.0103536	0.0146172	0.0136298	0.0292127	0.0177348	0.0169617	0.01535	0.00207695
0.0106519	0.00545153	0.00365623	0.00293371	0.0237379	0.00432784	0.00664725	0.00362289	0.00571252	0.00547367	0.0168021	0.0197992	0.021141	0.00280825	0.0051812	0.027362	0.0173375	0.00382579	0.0146392	0.0131222	0.0176734	0.00990715	0.00730681	0.00129939	0.0130518	0.00149727	0.0071178	0.0157853	0.0185948	0.0115939	0.0101721	0.0130893	0.0124811	0.0237919	0.0110996	0.0108125	0.00142658	0.00401647	0.00689219	0.00636423	0.0143481	0.0088143	0.0104431	0.0146381	0.013625	0.0291846	0.0175792	0.0169245	0.0156186	0.00176583
0.0107917	0.00521043	0.00346292	0.00302416	0.0236629	0.00459502	0.00634863	0.00378109	0.00553779	0.00510705	0.0164265	0.0198435	0.0211901	0.00294863	0.00504385	0.0270009	0.0170403	0.00393116	0.0146985	0.0138993	0.0175305	0.00951528	0.00746646	0.00203178	0.0122512	0.0016752	0.00688794	0.015679	0.0185153	0.0119099	0.01009	0.0136129	0.011737	0.0246151	0.011154	0.0107201	0.00151662	0.00407735	0.00639706	0.00614944	0.0143729	0.00894616	0.0105587	0.0146489	0.0136441	0.029138	0.0174566	0.0168927	0.0158755	0.00145963
0.0109283	0.00497266	0.00327271	0.00312499	0.0235931	0.00485741	0.00605003	0.00397777	0.00537476	0.00473838	0.016027	0.0198794	0.0212339	0.00312727	0.00490125	0.026622	0.0167619	0.00402097	0.0147725	0.0146979	0.017371	0.00913281	0.00763773	0.0028071	0.0114361	0.00193436	0.00685369	0.0155652	0.0184292	0.012279	0.0100172	0.0141301	0.0109857	0.0254131	0.011198	0.0106374	0.00162226	0.00421582	0.00589436	0.00597275	0.0143918	0.00912329	0.010704	0.0146454	0.0136601	0.0290819	0.0173461	0.0168711	0.0161159	0.00114776
0.0110673	0.00474039	0.00311021	0.00322159	0.0234744	0.00512949	0.00574904	0.00420801	0.00521737	0.00437461	0.0156133	0.0199118	0.021281	0.00333759	0.00476351	0.0262217	0.0164989	0.00409575	0.0148669	0.015511	0.0171979	0.00876835	0.00780873	0.00363024	0.0106146	0.00223599	0.00700394	0.0154532	0.0183294	0.0126892	0.00995613	0.0146279	0.010234	0.0261778	0.0112394	0.0105443	0.001759	0.00442936	0.00537571	0.00581926	0.0144023	0.00935073	0.0108853	0.0146325	0.013681	0.0289812	0.0172435	0.0168545	0.0163482	0.000833669
0.0112047	0.00451323	0.00296898	0.00330488	0.0233194	0.00540301	0.00544242	0.00447751	0.0050571	0.0040096	0.0151888	0.0199414	0.0213235	0.0035669	0.00462875	0.0258107	0.0162662	0.00415502	0.0149779	0.0163409	0.0169971	0.00842514	0.00797857	0.00444913	0.00977881	0.00256288	0.00735302	0.0153164	0.0182185	0.0131416	0.0098872	0.0151079	0.00948128	0.0269064	0.0112777	0.0104495	0.00191499	0.00470058	0.00485295	0.0057021	0.0144066	0.00961675	0.0111046	0.0146061	0.0137071	0.0288261	0.0171506	0.0168408	0.016579	0.000518845
0.0113301	0.00429008	0.00283471	0.00338509	0.0231635	0.00568121	0.00513277	0.00477297	0.00489624	0.00365392	0.014744	0.0199769	0.0213589	0.00382708	0.00449119	0.0253916	0.0160658	0.00419688	0.015098	0.0171805	0.0167783	0.00810656	0.00814556	0.00526867	0.00892749	0.00290263	0.00787107	0.0151763	0.0180869	0.0136332	0.00982869	0.0155675	0.00873009	0.0276129	0.011312	0.010354	0.00208443	0.00501497	0.00431718	0.00562852	0.0143954	0.00992236	0.0113472	0.0145702	0.0137436	0.0286769	0.0170778	0.0168298	0.016791	0.000221011
0.0114629	0.00407446	0.00271185	0.00345914	0.0229886	0.00595243	0.00482152	0.00509996	0.00473241	0.0032902	0.0142907	0.020031	0.0213874	0.00409793	0.00435732	0.0249631	0.0158994	0.0042288	0.0152396	0.0180314	0.0165423	0.00781387	0.00830825	0.00609587	0.00806727	0.00325565	0.00853468	0.015032	0.0179521	0.0141559	0.0097774	0.0159995	0.00798101	0.0282852	0.0113497	0.0102527	0.00226861	0.00537168	0.00377944	0.00557765	0.0144011	0.0102515	0.0116216	0.0145329	0.0137833	0.028514	0.0170129	0.0168177	0.0169915	0.000206119
0.0115919	0.00385915	0.00261878	0.00353146	0.0227878	0.0062275	0.00450987	0.00545344	0.00456226	0.00292797	0.0138248	0.0200781	0.0214065	0.00437905	0.00422923	0.0245235	0.0157611	0.00424489	0.0153818	0.0188937	0.0162787	0.007552	0.00846571	0.00693055	0.00719943	0.00362104	0.0093069	0.0148781	0.0178207	0.0146967	0.00971352	0.0164196	0.00724053	0.0289274	0.0113817	0.0101468	0.00246442	0.00575615	0.00324889	0.00556717	0.0143784	0.0106097	0.0119166	0.0144776	0.0138273	0.0283337	0.0169617	0.0168114	0.0171854	0.000511587
0.0116861	0.00365623	0.00254025	0.00360252	0.0225642	0.00649791	0.00418741	0.00583524	0.00438379	0.00265833	0.0133526	0.0201046	0.0214188	0.00467499	0.00410189	0.0240795	0.0156503	0.00424289	0.0155364	0.0197608	0.0159906	0.00731931	0.00860232	0.00776232	0.00631492	0.00396867	0.010158	0.0147188	0.0176795	0.0152581	0.00964489	0.0168333	0.00650998	0.0295354	0.0114036	0.0100474	0.00266449	0.00615722	0.00272951	0.00559318	0.0143041	0.0109825	0.0122315	0.0144165	0.0138839	0.02814	0.0169245	0.0168083	0.0173667	0.000848137
0.0118003	0.00346292	0.00247941	0.00367702	0.0223454	0.00676904	0.00386274	0.00623375	0.0042098	0.00243591	0.0128774	0.0201416	0.0214213	0.00497287	0.00398005	0.0236334	0.0155635	0.00422527	0.0157022	0.0206256	0.0156906	0.00712357	0.00873324	0.00859201	0.0054326	0.00431787	0.0110727	0.0145568	0.017529	0.0158292	0.00956408	0.0172222	0.00579361	0.030114	0.011412	0.00995131	0.00287276	0.00656581	0.00225138	0.00565633	0.0142352	0.0113562	0.0125716	0.014356	0.0139429	0.0279315	0.0168927	0.0167951	0.0175301	0.00120015
0.0119248	0.00327271	0.00244621	0.00374963	0.0221143	0.00703516	0.00354107	0.00664849	0.00404421	0.00226945	0.0124004	0.0201998	0.0214126	0.00527862	0.00386082	0.0231819	0.015499	0.00420035	0.0158848	0.0214962	0.0153729	0.00696666	0.00884165	0.00942828	0.00454755	0.00466656	0.012029	0.014384	0.0173656	0.0164245	0.00947462	0.0175927	0.00510951	0.0306542	0.0114209	0.00985347	0.00309556	0.00697583	0.001859	0.00574459	0.0141666	0.0117376	0.0129204	0.0142826	0.0140187	0.027696	0.0168711	0.0167831	0.0176918	0.00156119
0.0120419	0.00311021	0.00242456	0.00382359	0.0218681	0.00729717	0.00322185	0.00707835	0.00386816	0.00217967	0.0119271	0.0202703	0.0213924	0.00559467	0.00374489	0.0227177	0.0154716	0.00416915	0.0160804	0.0223657	0.0150362	0.00685183	0.00893693	0.0102593	0.00366659	0.00500508	0.0130162	0.0142095	0.0171868	0.017046	0.00938185	0.0179542	0.00446656	0.0311623	0.0114153	0.00976589	0.00333351	0.00738652	0.00163634	0.00586991	0.0140934	0.0121299	0.0132899	0.0142045	0.0140909	0.0274447	0.0168545	0.0167739	0.0178358	0.00192869
0.0121517	0.00296898	0.00242191	0.00389885	0.0215929	0.0075506	0.00291384	0.00752244	0.00367789	0.00218925	0.0114618	0.0203337	0.021364	0.00590707	0.00363627	0.0222528	0.0154663	0.00413676	0.0162783	0.0232318	0.0146955	0.00677658	0.00901993	0.011086	0.00280212	0.00533253	0.01403	0.014031	0.0170088	0.0176603	0.00927446	0.0182926	0.00387647	0.0316364	0.0114034	0.00967551	0.00357162	0.00779773	0.00166538	0.00603151	0.0140133	0.0125169	0.0136692	0.0141212	0.0141633	0.0271838	0.0168408	0.0167541	0.0179748	0.00230927
0.0122561	0.00283471	0.00244213	0.00397689	0.0213063	0.00779883	0.00260788	0.00798258	0.00347437	0.00229612	0.0110001	0.0203959	0.0213234	0.00621928	0.00353324	0.0217935	0.0154987	0.00409821	0.0164883	0.0240903	0.0143359	0.00673636	0.00908684	0.0119055	0.00196628	0.00565531	0.0150591	0.0138463	0.0168239	0.0182857	0.00915847	0.0186183	0.0033684	0.0320805	0.0113922	0.00959248	0.003818	0.00819982	0.00194583	0.00621557	0.0139252	0.0128994	0.0140589	0.014033	0.0142505	0.0269094	0.0168298	0.0167333	0.0180985	0.00269965
0.0123522	0.00271185	0.00248372	0.00405608	0.0209987	0.00804448	0.00231357	0.00846773	0.00326259	0.00249357	0.0105563	0.0204658	0.0212702	0.00653225	0.00343682	0.0213379	0.0155443	0.004065	0.0167031	0.0249473	0.0139596	0.00673291	0.00913577	0.012725	0.00125434	0.00597843	0.0161047	0.0136598	0.0166262	0.0188998	0.00903222	0.0189131	0.00298458	0.0324797	0.0113682	0.00951439	0.00407575	0.00858919	0.00239968	0.00640826	0.0138301	0.013279	0.014454	0.0139439	0.0143381	0.0266138	0.0168177	0.0167078	0.0182335	0.00310174
0.0124339	0.00261878	0.00254231	0.00413433	0.020672	0.00827857	0.00203328	0.00896249	0.00304406	0.00275505	0.0101355	0.0205488	0.021211	0.00684049	0.00334773	0.0208834	0.0155866	0.00404041	0.0169226	0.0257998	0.013574	0.00676137	0.00915344	0.0135272	0.000975711	0.00629564	0.0171552	0.0134675	0.0164271	0.0195039	0.00889088	0.0191831	0.00277703	0.0328446	0.0113418	0.00945107	0.0043416	0.00896965	0.00296485	0.00661442	0.0137265	0.0136402	0.0148492	0.0138423	0.0144354	0.0263113	0.0168114	0.0166666	0.0183602	0.00351588
0.0125104	0.00254025	0.00261116	0.00421093	0.0203271	0.0085042	0.00179073	0.00945697	0.00282672	0.00307044	0.00974626	0.020627	0.0211388	0.00715758	0.00326842	0.0204445	0.01565	0.00402545	0.0171452	0.0266445	0.0131654	0.00682147	0.00915786	0.0143286	0.00140993	0.00660254	0.0182025	0.0132744	0.0162185	0.0201008	0.00874133	0.0194334	0.00277267	0.03319	0.0113105	0.00938734	0.0046113	0.00933069	0.0035918	0.00683691	0.0136185	0.013983	0.0152512	0.0137395	0.0145441	0.0259987	0.0168083	0.0166206	0.0184317	0.00393282
0.0125796	0.00247941	0.00267944	0.00428527	0.0199619	0.00871991	0.00158263	0.00995799	0.00261561	0.00341994	0.00938618	0.0206999	0.0210487	0.00747541	0.0031894	0.0200201	0.0157388	0.00403299	0.0173684	0.0274804	0.012751	0.00691389	0.00914384	0.0151215	0.00216523	0.00690047	0.0192456	0.0130722	0.0160022	0.0206905	0.00857805	0.0196655	0.00296364	0.0335038	0.0112696	0.00933551	0.00489384	0.00967883	0.00424619	0.00707408	0.0135004	0.0143172	0.0156593	0.0136356	0.0146654	0.0256644	0.0167951	0.0165651	0.0184914	0.00436167
0.0126384	0.00244621	0.00275074	0.00436678	0.0195879	0.00892934	0.00143018	0.010466	0.00242257	0.00379866	0.00906176	0.0207665	0.0209455	0.00778627	0.00312265	0.0195984	0.0158427	0.00406441	0.0175888	0.0283031	0.0123487	0.00702757	0.00910893	0.0158986	0.00300158	0.00718953	0.0202675	0.0128692	0.0157789	0.0212698	0.00840318	0.0198876	0.00331838	0.0337895	0.0112174	0.00931993	0.00517859	0.010013	0.00492638	0.00732169	0.0133695	0.014631	0.0160827	0.013553	0.0147879	0.0253302	0.0167831	0.0164999	0.0185351	0.00480008
0.0126906	0.00242456	0.00283711	0.00445093	0.0191903	0.00914175	0.0013439	0.0109895	0.00220075	0.00419608	0.00879044	0.0208358	0.0208289	0.00809873	0.00306727	0.019183	0.0159662	0.00412774	0.0178164	0.0291125	0.011943	0.0071583	0.00905094	0.0166648	0.00385517	0.00746135	0.0212848	0.0126682	0.0155553	0.0218331	0.00821567	0.0200876	0.00377993	0.0340265	0.0111659	0.00928653	0.00547336	0.0103181	0.0056168	0.00757881	0.0132413	0.0149221	0.0164975	0.0134669	0.0149211	0.0249873	0.0167739	0.016427	0.0185794	0.00524207
0.0127279	0.00242191	0.00293371	0.00453929	0.0187805	0.0093588	0.00134009	0.011519	0.00196041	0.0046042	0.00857276	0.0208969	0.0206987	0.00840629	0.00301952	0.0187757	0.0161023	0.00422366	0.018044	0.0299023	0.0115396	0.00730681	0.00896969	0.0174288	0.00470925	0.00771772	0.0222966	0.0124595	0.0153191	0.0223787	0.00801556	0.0202631	0.00429987	0.0342242	0.0111014	0.00925991	0.0057802	0.0106159	0.00632441	0.00784706	0.0131047	0.0151896	0.0168878	0.0133333	0.0150517	0.0246397	0.0167541	0.01634	0.0186146	0.00569858
0.0127682	0.00244213	0.00302416	0.00464087	0.0183465	0.00955894	0.0014241	0.0120493	0.00177021	0.00502298	0.0084223	0.0209571	0.0205496	0.00871321	0.00297179	0.0183827	0.0162573	0.00438152	0.0182772	0.0306754	0.0111278	0.00746646	0.00886767	0.0181693	0.00555812	0.00797149	0.0233039	0.0122476	0.0150668	0.0229056	0.00780422	0.0204256	0.0048606	0.0343848	0.011043	0.00924923	0.00608326	0.0108873	0.00704808	0.00811295	0.0129617	0.0154349	0.0172729	0.0132009	0.0151957	0.0242849	0.0167333	0.0162414	0.0186382	0.00615681
0.0127943	0.00248372	0.00312499	0.00476372	0.017911	0.00974595	0.00157918	0.0125871	0.00162261	0.00544226	0.00833977	0.021023	0.020386	0.00902065	0.0029343	0.0180148	0.0164236	0.00460185	0.0185145	0.0314291	0.0107165	0.00763773	0.00874972	0.0188978	0.00640575	0.00821404	0.024296	0.0120364	0.014806	0.0234078	0.00757991	0.0205609	0.0054498	0.0345194	0.0109775	0.00926384	0.00640283	0.0111376	0.00778029	0.00838136	0.012814	0.0156487	0.0176525	0.0130797	0.015319	0.0239276	0.0167078	0.0161469	0.0186481	0.00662207
0.0128113	0.00254231	0.00322159	0.00488749	0.017463	0.00992857	0.00177138	0.0131212	0.00153818	0.00586222	0.00832791	0.0210822	0.0202124	0.00932114	0.00291075	0.0176668	0.0165866	0.00487477	0.0187508	0.0321649	0.0103062	0.00780873	0.00860957	0.0196114	0.00724458	0.00843979	0.025255	0.0118248	0.0145319	0.0238947	0.00734688	0.0206804	0.00604292	0.0346184	0.0108973	0.00928329	0.00672521	0.011369	0.0085223	0.00865594	0.0126557	0.0158433	0.0180167	0.0129657	0.0154508	0.0235643	0.0166666	0.0160362	0.0186452	0.00709672
0.0128268	0.00261116	0.00330488	0.00500514	0.0169999	0.0101036	0.0020056	0.0136568	0.00152891	0.00628355	0.008395	0.021141	0.0200234	0.00962278	0.00289327	0.0173375	0.0167458	0.00519868	0.0189946	0.0328782	0.00990715	0.00797857	0.00843832	0.020305	0.00806151	0.00865184	0.0262006	0.0116082	0.0142478	0.0243641	0.00709672	0.0207921	0.00662771	0.0346845	0.0108125	0.0093121	0.00704296	0.0115672	0.00926668	0.00893378	0.0124937	0.0160171	0.0183735	0.0128528	0.0156414	0.0232036	0.0166206	0.0159057	0.0186324	0.00757689
0.0128261	0.00267944	0.00338509	0.0051318	0.0165216	0.0102732	0.00225938	0.0141988	0.00161047	0.00670002	0.0085394	0.0211901	0.0198137	0.00991599	0.00289227	0.0170403	0.0169135	0.00555975	0.0192358	0.0335658	0.00951528	0.00814556	0.00825587	0.0209833	0.00886007	0.00885558	0.0271369	0.0113916	0.0139564	0.0248023	0.00683967	0.0208752	0.00720611	0.0347121	0.0107201	0.00937337	0.00737197	0.0117494	0.0100101	0.00920212	0.0123306	0.0161587	0.0187159	0.0127437	0.0158312	0.0228434	0.0165651	0.0157682	0.0186049	0.00805585
0.0128187	0.00275074	0.00345914	0.00525843	0.0160389	0.0104408	0.00252567	0.0147655	0.00177815	0.00711357	0.00875206	0.0212339	0.0195845	0.0102034	0.00289513	0.0167619	0.0170882	0.00596533	0.0194621	0.03423	0.00913281	0.00830825	0.0080567	0.0216596	0.00964318	0.00906282	0.0280489	0.0111783	0.0136506	0.0252201	0.00657036	0.0209379	0.00777092	0.0347091	0.0106374	0.00944229	0.00771479	0.0119103	0.0107586	0.00947036	0.0121668	0.0162698	0.0190457	0.01264	0.0160149	0.0224829	0.0164999	0.0156131	0.0185658	0.00855988
0.0127966	0.00283711	0.00353146	0.00539355	0.0155354	0.0105955	0.00280702	0.0153336	0.00202459	0.00751834	0.00902598	0.021281	0.0193465	0.0104865	0.00290796	0.0164989	0.0172568	0.00642552	0.019675	0.0348726	0.00876835	0.00846571	0.0078338	0.0223525	0.0104087	0.00925089	0.0289454	0.0109737	0.0133382	0.0256076	0.00630054	0.0209852	0.00832463	0.0346742	0.0105443	0.00951692	0.00804982	0.0120354	0.0114989	0.0097374	0.0119924	0.016346	0.0193497	0.0125344	0.0161927	0.0221177	0.016427	0.0154427	0.0185123	0.00908109
0.0127678	0.00293371	0.00360252	0.00553909	0.0150118	0.0107456	0.00309221	0.0158773	0.00231751	0.00792121	0.00936204	0.0213235	0.0190968	0.0107627	0.00292967	0.0162662	0.0174289	0.0069296	0.0198843	0.0354884	0.00842514	0.00860232	0.00759205	0.0229761	0.0111501	0.00940369	0.029809	0.0107638	0.0130212	0.025972	0.00601845	0.021016	0.00885639	0.0346101	0.0104495	0.0095893	0.00839046	0.0121252	0.0122354	0.010006	0.0118156	0.0164004	0.0196341	0.0124387	0.0163732	0.0217521	0.01634	0.0152668	0.0184418	0.00958243
0.0127291	0.00302416	0.00367702	0.00568726	0.0145016	0.0108919	0.00337616	0.0164315	0.00264857	0.00832046	0.00975123	0.0213589	0.0188285	0.0110284	0.00296238	0.0160658	0.0175997	0.0074685	0.0200887	0.0360752	0.00810656	0.00873324	0.00734229	0.0235668	0.011872	0.00955161	0.0306518	0.0105479	0.0126959	0.026309	0.00573256	0.0210242	0.00937277	0.0345278	0.010354	0.00968524	0.00872861	0.0121966	0.0129625	0.0102714	0.0116405	0.0164206	0.019904	0.0123397	0.0165604	0.0214119	0.0162414	0.0150716	0.0183567	0.0100951
0.012684	0.00312499	0.00374963	0.00583901	0.0139818	0.0110328	0.00365871	0.0169804	0.003008	0.00871048	0.0101813	0.0213874	0.0185471	0.0112999	0.00300375	0.0158994	0.0177616	0.00805103	0.0202876	0.0366325	0.00781387	0.00884165	0.00706809	0.0241443	0.0125705	0.00968677	0.0314734	0.0103384	0.0123588	0.0266157	0.00545029	0.021021	0.00987306	0.0344066	0.0102527	0.00979433	0.00905921	0.0122477	0.0136898	0.0105339	0.0114765	0.0164142	0.0201504	0.0122489	0.0167488	0.021072	0.0161469	0.0148621	0.018263	0.010605
0.012626	0.00322159	0.00382359	0.00598805	0.0134588	0.0111535	0.00394021	0.017538	0.00339722	0.00909626	0.0106364	0.0214065	0.0182543	0.011581	0.00305407	0.0157611	0.0179109	0.0086642	0.0204914	0.0371584	0.007552	0.00893693	0.00677306	0.0246981	0.0132409	0.00980497	0.0322707	0.0101254	0.0120047	0.0268893	0.00516706	0.0209962	0.0103486	0.0342537	0.0101468	0.00992327	0.00939563	0.0122786	0.0144296	0.0107922	0.0112994	0.0163792	0.0203781	0.0121611	0.0169374	0.0207347	0.0160362	0.0146539	0.0181495	0.0111287
0.0125546	0.00330488	0.00389885	0.00614274	0.0129192	0.0112716	0.00421775	0.0180945	0.00380507	0.0094581	0.0111188	0.0214188	0.0179391	0.0118411	0.00311031	0.0156503	0.0180602	0.00930207	0.0206912	0.0376426	0.00731931	0.00901993	0.00646906	0.0252281	0.0138874	0.00991295	0.0330286	0.00991409	0.0116539	0.02715	0.00488941	0.0209705	0.0107979	0.034071	0.0100474	0.0100636	0.00973749	0.012278	0.0151415	0.0110433	0.0110943	0.0163148	0.0205823	0.0120713	0.0171255	0.0204072	0.0159057	0.0144281	0.0180334	0.0116547
0.0124727	0.00338509	0.00397689	0.00631808	0.0123756	0.0113791	0.00448207	0.0186454	0.00423341	0.0098122	0.0116261	0.0214213	0.0175992	0.0120948	0.00317105	0.0155635	0.018217	0.00996421	0.0208825	0.0381019	0.00712357	0.00908684	0.00614082	0.0257352	0.0145102	0.0100026	0.0337517	0.0097023	0.0112946	0.0273711	0.00461671	0.0209322	0.01122	0.033863	0.00995131	0.0102108	0.0100888	0.0122487	0.0158417	0.0112962	0.0109007	0.0162255	0.0207708	0.0119934	0.0173135	0.0200883	0.0157682	0.014203	0.0179035	0.0121774
0.0123922	0.00345914	0.00405608	0.00649717	0.0118419	0.0115001	0.00474532	0.0191968	0.00467441	0.0101604	0.0121531	0.0214126	0.0172475	0.012346	0.00323724	0.015499	0.0183576	0.0106609	0.0210656	0.038551	0.00696666	0.00913577	0.0058006	0.0262206	0.0151001	0.0100767	0.0344433	0.00949702	0.0109235	0.0275881	0.00437056	0.0208771	0.0116136	0.0336342	0.00985347	0.0103637	0.0104404	0.012194	0.0165388	0.0115422	0.0107094	0.0160971	0.0209275	0.0119157	0.0175008	0.0197924	0.0156131	0.0139965	0.0177545	0.0127044
0.0122944	0.00353146	0.00413433	0.00667527	0.0112903	0.0116206	0.0049846	0.0197451	0.00512315	0.0105095	0.0127148	0.0213924	0.0168827	0.0125921	0.00330909	0.0154716	0.0184791	0.0113785	0.021244	0.0389766	0.00685183	0.00915344	0.00545764	0.0266751	0.0156557	0.0101389	0.0351123	0.00929259	0.0105446	0.0277574	0.0041466	0.0208195	0.0119718	0.0333819	0.00976589	0.0105132	0.0108005	0.0121035	0.0172247	0.0117803	0.0105221	0.0159413	0.0210538	0.0118374	0.0176924	0.0195079	0.0154427	0.0137698	0.0175911	0.0132271
0.0121886	0.00360252	0.00421093	0.00685463	0.0107266	0.0117108	0.00521195	0.0202898	0.00558193	0.0108425	0.0132726	0.021364	0.0165111	0.0128359	0.00339125	0.0154663	0.0185923	0.0121106	0.021414	0.039354	0.00677658	0.00915786	0.00510808	0.0271146	0.0161843	0.0101803	0.0357591	0.00909234	0.0101637	0.0278598	0.00396175	0.0207519	0.0123057	0.0330982	0.00967551	0.0106637	0.011158	0.0119819	0.0178887	0.0120139	0.0103311	0.0157621	0.0211548	0.0117653	0.0178731	0.0192369	0.0152668	0.0135192	0.017411	0.0137573
0.0120736	0.00367702	0.00428527	0.00703676	0.0101609	0.0117911	0.00545892	0.0208306	0.00604886	0.0111565	0.0138359	0.0213234	0.0161335	0.0130759	0.00347959	0.0154987	0.0186872	0.0128566	0.0215746	0.0396886	0.00673636	0.00914384	0.00474406	0.0275329	0.0166824	0.0101857	0.0363725	0.00889009	0.00977874	0.0279453	0.0038182	0.0206822	0.01261	0.0327918	0.00959248	0.0108139	0.0115157	0.0118367	0.0185398	0.0122403	0.0101382	0.0155634	0.0212327	0.0116928	0.0180555	0.0189763	0.0150716	0.0132601	0.0172153	0.0142825
0.0119448	0.00374963	0.00436678	0.0072183	0.00958833	0.0118634	0.00570067	0.0213727	0.00651893	0.0114536	0.0143958	0.0212702	0.0157437	0.0133135	0.00357393	0.0155443	0.018781	0.0136295	0.0217273	0.03999	0.00673291	0.00910893	0.00438017	0.0279286	0.0171521	0.0101888	0.0369605	0.00869589	0.00939552	0.0280034	0.00373911	0.0206054	0.0128835	0.0324605	0.00951439	0.0109743	0.011878	0.0116648	0.0191765	0.0124568	0.00994774	0.0153281	0.0212899	0.0116244	0.0182339	0.0187347	0.0148621	0.0129892	0.0170212	0.01481
0.0118122	0.00382359	0.00445093	0.00739505	0.00902727	0.0119435	0.00592634	0.021907	0.0070012	0.0117348	0.0149599	0.021211	0.0153474	0.0135462	0.0036743	0.0155866	0.018881	0.0144142	0.0218738	0.0402538	0.00676137	0.00905094	0.00402041	0.0282917	0.0175812	0.0101797	0.0375158	0.00851556	0.00901219	0.0280499	0.00372071	0.0205195	0.0131273	0.0321036	0.00945107	0.011161	0.012238	0.0114708	0.0197926	0.0126651	0.00975205	0.0150545	0.0213187	0.0115562	0.0184055	0.0185018	0.0146539	0.0127227	0.016817	0.0153303
0.0116672	0.00389885	0.00453929	0.00757845	0.00847268	0.0119983	0.00613812	0.0224331	0.00748316	0.0119942	0.0155171	0.0211388	0.0149478	0.0137787	0.0037819	0.01565	0.0189728	0.0152102	0.0220105	0.0404854	0.00682147	0.00896969	0.00367717	0.028629	0.0179735	0.0101423	0.0380305	0.00833781	0.00862449	0.0280529	0.00377627	0.0204293	0.0133345	0.0317236	0.00938734	0.0113379	0.0126015	0.0112536	0.0203893	0.0128663	0.00955935	0.0147616	0.0213244	0.0114871	0.0185761	0.0182852	0.0144281	0.0124657	0.0165779	0.0158473
0.0115202	0.00397689	0.00464087	0.00775976	0.00792199	0.0120541	0.00633567	0.0229498	0.00796961	0.01224	0.0160615	0.0210487	0.0145467	0.014009	0.00389446	0.0157388	0.0190403	0.0160234	0.0221381	0.0406919	0.00691389	0.00886767	0.00335728	0.0289392	0.0183375	0.0101097	0.038505	0.00816122	0.00824608	0.0280316	0.00390421	0.0203391	0.0135074	0.0313282	0.00933551	0.0115064	0.0129646	0.011004	0.0209676	0.0130635	0.00936479	0.0144364	0.0212987	0.011423	0.0187429	0.018085	0.014203	0.0122024	0.0163369	0.0163611
0.0113582	0.00405608	0.00476372	0.00794678	0.00737398	0.0120997	0.00651994	0.0234648	0.00845726	0.0124766	0.0165997	0.0209455	0.0141405	0.0142316	0.00401064	0.0158427	0.0190944	0.0168407	0.022264	0.0408587	0.00702757	0.00874972	0.00306951	0.0292318	0.0186608	0.0100512	0.0389529	0.00799382	0.0078728	0.0279789	0.0040972	0.0202508	0.0136489	0.0309162	0.00931993	0.0116887	0.0133343	0.0107368	0.0215256	0.013251	0.00917781	0.0141006	0.0212736	0.0113699	0.0189014	0.0179015	0.0139965	0.0119351	0.0160925	0.016873
0.0111903	0.00413433	0.00488749	0.00813012	0.00683713	0.0121524	0.00669687	0.0239782	0.00894906	0.0126968	0.0171149	0.0208289	0.0137305	0.0144437	0.00412565	0.0159662	0.0191261	0.0176603	0.02238	0.0409956	0.0071583	0.00860957	0.00284039	0.0294949	0.0189421	0.00996116	0.0393647	0.00783704	0.0075107	0.0278963	0.00435326	0.0201638	0.0137525	0.0304808	0.00928653	0.0118686	0.0136967	0.010446	0.0220614	0.0134304	0.00898162	0.0137343	0.0211948	0.0113189	0.0190516	0.0177348	0.0137698	0.0116653	0.0158436	0.0173804
0.0110133	0.00421093	0.00500514	0.00830668	0.00631005	0.0121948	0.00686079	0.0244873	0.00945032	0.0129057	0.0176295	0.0206987	0.0133184	0.0146568	0.00424607	0.0161023	0.0191485	0.0184827	0.0224887	0.0410865	0.00730681	0.00843832	0.00269045	0.0297276	0.0191879	0.00987132	0.0397424	0.00768708	0.00715863	0.0277863	0.00465216	0.0200737	0.0138262	0.0300328	0.00925991	0.0120427	0.0140612	0.0101336	0.0225788	0.0135966	0.00879166	0.0133474	0.0210516	0.0112399	0.0191955	0.0175792	0.0135192	0.0113999	0.015586	0.0178761
0.0108256	0.00428527	0.0051318	0.00848493	0.00578819	0.0122194	0.00700721	0.0249819	0.00993184	0.0131004	0.0181326	0.0205496	0.0129164	0.0148642	0.00437424	0.0162573	0.0191592	0.0193094	0.0225819	0.0411402	0.00746646	0.00825587	0.00263505	0.0299311	0.0193963	0.00975869	0.0400671	0.00755143	0.006831	0.0276553	0.00499319	0.0199972	0.0138576	0.0295736	0.00924923	0.0122074	0.0144302	0.00980435	0.0230631	0.0137553	0.00860225	0.0129435	0.0209008	0.0111685	0.0193317	0.0174566	0.0132601	0.0111417	0.0153188	0.0183634
0.010629	0.00436678	0.00525843	0.00868193	0.00527916	0.0122408	0.00713382	0.0254684	0.0104041	0.0132806	0.0186102	0.020386	0.0125211	0.0150738	0.00450872	0.0164236	0.0191628	0.0201528	0.0226696	0.0411693	0.00763773	0.0080567	0.00268516	0.0301121	0.0195655	0.00962516	0.0403597	0.0074264	0.00652653	0.0274974	0.0053881	0.0199264	0.013858	0.0290961	0.00926384	0.0123776	0.0148158	0.00944424	0.0235312	0.0138991	0.00841793	0.0125099	0.0207221	0.0111164	0.0194525	0.0173461	0.0129892	0.0108855	0.0150409	0.0188453
0.0104355	0.00445093	0.00539355	0.0088672	0.00478368	0.0122577	0.00724516	0.0259402	0.0108762	0.0134352	0.0190732	0.0202124	0.0121341	0.0152762	0.0046492	0.0165866	0.0191605	0.0210022	0.0227536	0.0411529	0.00780873	0.0078338	0.0028457	0.0302623	0.019703	0.00948061	0.0406159	0.00732166	0.00623825	0.0273082	0.00582436	0.0198644	0.0138202	0.0286106	0.00928329	0.0125443	0.0152053	0.00906572	0.0239767	0.0140282	0.00824209	0.0120633	0.0205339	0.0110635	0.0195732	0.0172435	0.0127227	0.0106336	0.0147488	0.0193129
0.0102293	0.00453929	0.00553909	0.00900815	0.00431443	0.0122658	0.0073504	0.0264079	0.0113455	0.0135806	0.0195257	0.0200234	0.0117689	0.0154738	0.00479506	0.0167458	0.0191482	0.0218228	0.0228291	0.0411031	0.00797857	0.00759205	0.00310183	0.0303873	0.019803	0.00933269	0.0408336	0.00722616	0.00599413	0.0270878	0.00626792	0.0197984	0.013748	0.0281103	0.0093121	0.0127088	0.0155716	0.00866718	0.0243939	0.0141539	0.00806032	0.0115963	0.0203201	0.0110176	0.0197058	0.0171506	0.0124657	0.010388	0.0144469	0.0197818
0.0100183	0.00464087	0.00568726	0.00915427	0.0038683	0.0122621	0.00745045	0.026858	0.0118056	0.0137096	0.0199455	0.0198137	0.011417	0.0156705	0.00493756	0.0169135	0.019134	0.022648	0.0229081	0.0410124	0.00814556	0.00734229	0.00344435	0.0304858	0.0198657	0.00916843	0.0410261	0.00715655	0.00579063	0.0268496	0.00672437	0.019748	0.0136457	0.0276003	0.00937337	0.012871	0.0159429	0.00825204	0.0247777	0.0142713	0.00788926	0.0111141	0.0200811	0.0109794	0.0198057	0.0170778	0.0122024	0.0101539	0.0141473	0.0202367
0.00980853	0.00476372	0.00583901	0.00930316	0.00345605	0.0122599	0.00753394	0.0273162	0.0122647	0.0138226	0.0203477	0.0195845	0.0110831	0.0158661	0.00508612	0.0170882	0.0191094	0.0234705	0.0229756	0.0408964	0.00830825	0.00706809	0.00384697	0.0305645	0.0198921	0.0090058	0.0411957	0.00710553	0.00562498	0.0265939	0.00719585	0.0197186	0.0135062	0.0270877	0.00944229	0.0130266	0.0163162	0.00781686	0.0251408	0.0143781	0.00771711	0.0106088	0.0198138	0.0109439	0.019882	0.0170129	0.0119351	0.00992726	0.0138497	0.0207015
0.00958445	0.00488749	0.00598805	0.00945459	0.00307927	0.0122415	0.0075988	0.0277554	0.0127167	0.0139182	0.0207079	0.0193465	0.0107693	0.016056	0.00523861	0.0172568	0.0190791	0.0242883	0.023018	0.0407387	0.00846571	0.00677306	0.00428783	0.030622	0.0198762	0.00880001	0.041313	0.00707376	0.00551092	0.0263101	0.00769189	0.0196925	0.0133272	0.0265712	0.00951692	0.0131702	0.0166936	0.00736407	0.0254774	0.0144727	0.00756039	0.0100928	0.01953	0.0109174	0.0199424	0.0169617	0.0116653	0.00971072	0.0135507	0.0211427
0.00936128	0.00500514	0.00614274	0.00961822	0.00275457	0.0122179	0.00765135	0.0281424	0.0131578	0.0139981	0.021044	0.0190968	0.0104869	0.0162479	0.00539564	0.0174289	0.0190381	0.0250975	0.0230497	0.0405495	0.00860232	0.00646906	0.00476463	0.0306218	0.0198195	0.00854074	0.0413781	0.00707099	0.00544918	0.0260036	0.00819372	0.0196718	0.0131161	0.0260596	0.0095893	0.0133151	0.0170522	0.00689219	0.0257924	0.0145555	0.00740904	0.00956626	0.0192244	0.010899	0.0199978	0.0169245	0.0113999	0.00950645	0.0132473	0.0215256
0.00913151	0.0051318	0.00631808	0.00978292	0.00250304	0.0121738	0.00768794	0.0285301	0.0135888	0.0140701	0.0213614	0.0188285	0.0102325	0.0164387	0.00555461	0.0175997	0.0189906	0.0258922	0.0230746	0.040323	0.00873324	0.00614082	0.00526583	0.0306088	0.0197202	0.00829591	0.041402	0.00709449	0.0054426	0.0256762	0.00870591	0.0196681	0.0128776	0.0255314	0.00968524	0.0134441	0.0174151	0.00639706	0.0260776	0.014622	0.00725854	0.00902584	0.0188963	0.0108855	0.0200331	0.0168927	0.0111417	0.00932069	0.0129391	0.0219171
0.00890003	0.00525843	0.00649717	0.00992307	0.00233543	0.0121241	0.00770668	0.028907	0.0140056	0.0141241	0.0216468	0.0185471	0.0100138	0.0166431	0.00571523	0.0177616	0.0189382	0.0266734	0.0230928	0.0400622	0.00884165	0.0058006	0.00578422	0.030574	0.0195832	0.00805342	0.0413828	0.00714623	0.00549604	0.0253346	0.00922405	0.0196873	0.0125988	0.0249925	0.00979433	0.0135632	0.017772	0.00589436	0.0263479	0.0146814	0.00711758	0.00846789	0.0185436	0.0108891	0.0200587	0.0168711	0.0108855	0.00915091	0.0126395	0.0222969
0.00866586	0.00539355	0.00667527	0.0100447	0.00226605	0.0120662	0.0077112	0.0292734	0.0144127	0.0141629	0.0219131	0.0182543	0.00984392	0.0168501	0.00588616	0.0179109	0.0188794	0.0274425	0.0231035	0.0397675	0.00893693	0.00545764	0.00632142	0.0305176	0.0194054	0.00780849	0.0413349	0.00722256	0.00560005	0.0249656	0.00974204	0.0197165	0.0123012	0.0244577	0.00992327	0.0136785	0.018117	0.00537571	0.0266189	0.0147239	0.00698628	0.00790173	0.0181657	0.0109014	0.020085	0.0168545	0.0106336	0.00899344	0.0123436	0.0226688
0.00842575	0.00553909	0.00685463	0.0101673	0.00229859	0.012021	0.00769887	0.029618	0.014806	0.0141921	0.0221512	0.0179391	0.0097166	0.0170071	0.00605167	0.0180602	0.0188108	0.0282038	0.0231066	0.0394454	0.00901993	0.00510808	0.00686945	0.0304449	0.0191973	0.00755035	0.0412492	0.00734295	0.00574932	0.0245842	0.0102707	0.0197707	0.0119619	0.0239291	0.0100636	0.0137864	0.0184755	0.00485295	0.0268221	0.0147516	0.0068598	0.00732933	0.0177711	0.0109311	0.020082	0.0168408	0.010388	0.00885074	0.0120531	0.0230248
0.00818169	0.00568726	0.00703676	0.0102872	0.00242446	0.0119645	0.0076747	0.0299491	0.0151789	0.0142111	0.0223593	0.0175992	0.00963712	0.0171757	0.00621826	0.018217	0.0187333	0.0289458	0.0231069	0.0390795	0.00908684	0.00474406	0.00741943	0.0303446	0.0189542	0.00728323	0.0411238	0.0074903	0.00595274	0.0241813	0.0107906	0.0198364	0.0115878	0.0234033	0.0102108	0.0138747	0.0188292	0.00431718	0.026979	0.01477	0.00674182	0.00675169	0.0173502	0.0109786	0.020069	0.0168298	0.0101539	0.0087306	0.0117686	0.0233714
0.00793375	0.00583901	0.0072183	0.0104085	0.00261888	0.0119206	0.00763496	0.0302633	0.0155356	0.0142152	0.0225633	0.0172475	0.00960535	0.0173442	0.00639066	0.0183576	0.0186619	0.0296706	0.0231017	0.0387094	0.00913577	0.00438017	0.0079793	0.0302195	0.0186775	0.00700407	0.0409649	0.00766181	0.00619043	0.0237791	0.0113063	0.0199209	0.0111879	0.0228905	0.0103637	0.0139568	0.0191718	0.00377944	0.0271109	0.0147694	0.00663876	0.00617057	0.0169185	0.011052	0.0200461	0.0168177	0.00992726	0.00863163	0.0114976	0.0236992
0.00768364	0.00598805	0.00739505	0.0105169	0.00286633	0.011854	0.00757564	0.0305572	0.0158782	0.0142145	0.0227355	0.0168827	0.00962231	0.0175149	0.00656415	0.0184791	0.0185813	0.030372	0.0230713	0.0382923	0.00915344	0.00402041	0.00853649	0.030065	0.0183574	0.00672187	0.0407685	0.00785831	0.00646847	0.0233439	0.0118267	0.0200202	0.0107552	0.0223907	0.0105132	0.0140331	0.0195036	0.00324889	0.0272185	0.0147789	0.00653876	0.005592	0.016465	0.0111546	0.020002	0.0168114	0.00971072	0.00855082	0.011233	0.0240021
0.00743538	0.00614274	0.00757845	0.0106304	0.00314555	0.0117349	0.00750695	0.0308345	0.0161989	0.0142094	0.0228212	0.0165111	0.00967871	0.0176899	0.00674086	0.0185923	0.018477	0.031055	0.023023	0.037797	0.00915786	0.00367717	0.00909659	0.0298958	0.0179927	0.00643232	0.0405189	0.00808475	0.00678148	0.0228894	0.0123409	0.0201329	0.0102888	0.0219003	0.0106637	0.0140934	0.0198337	0.00272951	0.0273047	0.0147925	0.00645138	0.00501998	0.0160042	0.0112782	0.0199457	0.0168083	0.00950645	0.00848809	0.010996	0.0242907
0.00718385	0.00631808	0.00775976	0.0107401	0.00344185	0.0116171	0.00743068	0.0310911	0.0165023	0.0141867	0.0228867	0.0161335	0.00978851	0.0178668	0.00691799	0.0186872	0.018379	0.0317154	0.0229771	0.0373004	0.00914384	0.00335728	0.00964892	0.0296996	0.0176028	0.00614496	0.0402458	0.00834881	0.00712212	0.022447	0.0128532	0.0202631	0.00979878	0.0214304	0.0108139	0.01415	0.0201475	0.00225138	0.0273558	0.0147895	0.00637074	0.00445081	0.0155255	0.0114308	0.0198688	0.0167951	0.00932069	0.00845101	0.0107745	0.024568
0.00693377	0.00649717	0.00794678	0.0108349	0.00375432	0.0114907	0.00733928	0.0313281	0.0167894	0.0141619	0.0229292	0.0157437	0.00994409	0.0180462	0.0070978	0.018781	0.0182938	0.0323512	0.0229234	0.0367735	0.00910893	0.00306951	0.0102014	0.0294788	0.0171722	0.00585567	0.0399377	0.008627	0.007488	0.02199	0.0133561	0.020412	0.00928038	0.0209887	0.0109743	0.0142048	0.0204582	0.001859	0.0273777	0.0147695	0.00630143	0.00390228	0.0150347	0.0116217	0.0197686	0.0167831	0.00915091	0.00843294	0.0105731	0.0248263
0.00668404	0.00667527	0.00813012	0.0109197	0.00407153	0.0113602	0.00723169	0.0315465	0.0170531	0.0141296	0.022946	0.0153474	0.0101426	0.0182203	0.007283	0.018881	0.018211	0.0329632	0.0228672	0.0362331	0.00905094	0.00284039	0.0107477	0.0292358	0.016712	0.00556046	0.0395958	0.00893244	0.0078763	0.0215282	0.0138483	0.0205742	0.00873768	0.0205614	0.011161	0.0142681	0.0207581	0.00163634	0.0273799	0.0147295	0.00624081	0.00338533	0.0145304	0.0118495	0.019664	0.0167739	0.00899344	0.00843778	0.0103936	0.0250599
0.00643797	0.00685463	0.00830668	0.0109914	0.00438819	0.011214	0.00710687	0.0317459	0.0172941	0.0140894	0.0229385	0.0149478	0.0103856	0.0184034	0.00746962	0.0189728	0.0181308	0.0335534	0.0228022	0.0356648	0.00896969	0.00269045	0.0112841	0.0289675	0.0162208	0.00526999	0.0392269	0.00927354	0.00828214	0.0210521	0.0143393	0.0207333	0.00816787	0.0201546	0.0113379	0.0142722	0.0210433	0.00166538	0.0273484	0.0146792	0.00619423	0.00291158	0.0140083	0.0120972	0.0195387	0.0167541	0.00885074	0.0084605	0.0102513	0.0252716
0.00619487	0.00703676	0.00848493	0.0110583	0.00470138	0.0110736	0.00697024	0.0319248	0.0175103	0.0140378	0.0228957	0.0145467	0.0106627	0.018579	0.00766162	0.0190403	0.0180538	0.0341119	0.0227256	0.0350778	0.00886767	0.00263505	0.0118148	0.0286828	0.0156942	0.00498301	0.0388239	0.00964372	0.00871525	0.0205678	0.0148155	0.020913	0.00756777	0.019776	0.0115064	0.0142574	0.0213147	0.00194583	0.0272938	0.014612	0.0061636	0.00250433	0.0134758	0.0123798	0.0193901	0.0167333	0.0087306	0.00849827	0.0101439	0.0254638
0.00594444	0.0072183	0.00868193	0.0111102	0.0050092	0.0109288	0.00682377	0.0320757	0.0177038	0.0139793	0.0228213	0.0141405	0.0109616	0.0187579	0.00785524	0.0190944	0.0179682	0.0346506	0.0226409	0.0344646	0.00874972	0.00268516	0.0123479	0.0283849	0.0151305	0.00470257	0.0383824	0.0100221	0.00915715	0.0200792	0.0152862	0.0211048	0.00694658	0.0194345	0.0116887	0.0142326	0.0215798	0.00239968	0.0272162	0.0145395	0.00614621	0.00220711	0.0129432	0.012698	0.0192357	0.0167078	0.00863163	0.00855101	0.0100618	0.0256406
0.00569666	0.00739505	0.0088672	0.0111493	0.00530542	0.010771	0.00666518	0.0322011	0.0178748	0.013915	0.0227122	0.0137305	0.0112798	0.0189366	0.00805246	0.0191261	0.0178864	0.0351537	0.0225407	0.0338375	0.00860957	0.0028457	0.0128824	0.0280678	0.0145368	0.00442855	0.0379146	0.0104214	0.00959693	0.0195852	0.0157441	0.02132	0.00629429	0.0191292	0.0118686	0.014193	0.0218286	0.00296485	0.0271061	0.0144505	0.00613917	0.00205688	0.012387	0.0130486	0.0190616	0.0166666	0.00855082	0.008619	0.0100241	0.0257917
0.00545153	0.00757845	0.00900815	0.011185	0.00558947	0.0105985	0.0064992	0.032319	0.0180239	0.0138555	0.0225743	0.0133184	0.0116242	0.01912	0.00823834	0.0191485	0.0178	0.0356276	0.0224321	0.033191	0.00843832	0.00310183	0.0133849	0.0277349	0.0139078	0.00416808	0.0374266	0.010838	0.0100465	0.0190914	0.0161918	0.021542	0.00562375	0.0188491	0.0120427	0.0141551	0.0220635	0.0035918	0.0269695	0.0143479	0.00614138	0.00208298	0.0118212	0.0134435	0.0188516	0.0166206	0.00848809	0.00870846	0.0100072	0.0259219
0.00521043	0.00775976	0.00915427	0.0112105	0.00586611	0.0104138	0.0063242	0.0324089	0.0181451	0.0138042	0.022409	0.0129164	0.0119843	0.0193022	0.00842119	0.0191592	0.0177138	0.0360776	0.0223191	0.0325226	0.00825587	0.00344435	0.0138787	0.0273903	0.013245	0.00391919	0.0369183	0.0112662	0.0105073	0.0186041	0.0166292	0.0217658	0.0049317	0.018603	0.0122074	0.0141067	0.0222913	0.00424619	0.0268069	0.0142473	0.00615489	0.00228725	0.0112723	0.0138655	0.0186226	0.0165651	0.00845101	0.00880943	0.0100394	0.0260302
0.00497266	0.00794678	0.00930316	0.0112335	0.00613114	0.0102151	0.00613279	0.0324762	0.0182371	0.0137466	0.0222127	0.0125211	0.0123581	0.0194754	0.00860675	0.0191628	0.0176312	0.036511	0.0221976	0.0318383	0.0080567	0.00384697	0.0143589	0.027029	0.0125664	0.00369311	0.0363904	0.0117096	0.0109766	0.0181187	0.0170509	0.0219931	0.00422088	0.018401	0.0123776	0.0140523	0.0225254	0.00492638	0.0266231	0.0141434	0.00617982	0.00262091	0.0107227	0.0143225	0.0183784	0.0164999	0.00843294	0.00892597	0.0101064	0.0261292
0.00474039	0.00813012	0.00945459	0.0112381	0.00638214	0.0100017	0.0059303	0.0325244	0.0183048	0.0136951	0.0219889	0.0121341	0.0127342	0.0196566	0.00879304	0.0191605	0.0175466	0.0369078	0.0220642	0.0311401	0.0078338	0.00428783	0.0148314	0.0266574	0.0118565	0.00347987	0.0358393	0.0121646	0.0114471	0.0176378	0.0174515	0.022226	0.0034909	0.0182385	0.0125443	0.0139712	0.0227559	0.0056168	0.0264157	0.014028	0.00622426	0.00302847	0.0101755	0.0148196	0.0181182	0.016427	0.00843778	0.00904906	0.0102173	0.0262034
0.00451323	0.00830668	0.00961822	0.011205	0.0066243	0.00978008	0.00572322	0.032546	0.0183457	0.0136378	0.0217424	0.0117689	0.0131129	0.0198321	0.00898269	0.0191482	0.0174648	0.0372307	0.0219235	0.0304405	0.00759205	0.00476463	0.0152905	0.0262705	0.0111277	0.00328841	0.0352751	0.0126352	0.0119336	0.0171511	0.0178467	0.0224666	0.00274365	0.0181145	0.0127088	0.013874	0.0229248	0.00632441	0.0261765	0.0138931	0.00627455	0.00348022	0.00962357	0.0153486	0.0178483	0.01634	0.0084605	0.00918663	0.0103794	0.0262542
0.00429008	0.00848493	0.00978292	0.0111643	0.00685253	0.00954938	0.00550373	0.0325498	0.018364	0.0135855	0.0214716	0.011417	0.0134983	0.0200069	0.00916666	0.019134	0.0173743	0.0375317	0.0217748	0.029729	0.00734229	0.00526583	0.0157327	0.0258775	0.0103724	0.00312912	0.0347005	0.0131151	0.0124192	0.0166684	0.0182191	0.0227019	0.00198362	0.0180269	0.012871	0.0137714	0.0230848	0.00704808	0.025906	0.0137529	0.00633947	0.00396021	0.00907157	0.0159001	0.0175604	0.0162414	0.00849827	0.00933013	0.0105677	0.0262891
0.00407446	0.00868193	0.00992307	0.0111227	0.00707001	0.00931201	0.00527677	0.0325445	0.0183577	0.0135359	0.0211788	0.0110831	0.0138849	0.0201897	0.00935342	0.0191094	0.0172786	0.0377973	0.0216136	0.0290084	0.00706809	0.00578422	0.0161606	0.0254804	0.00959521	0.00301023	0.0341156	0.0136159	0.0129165	0.0161988	0.01858	0.0229438	0.00122885	0.0179611	0.0130266	0.0136613	0.0232404	0.00778029	0.0256173	0.0136065	0.00641688	0.00444769	0.00851386	0.0164842	0.0172609	0.0161469	0.00855101	0.00948396	0.010797	0.0263078
0.00385915	0.0088672	0.0100447	0.011076	0.00727503	0.00907729	0.00504166	0.0325051	0.0183249	0.0134887	0.0208623	0.0107693	0.0142687	0.0203735	0.00953982	0.0190791	0.0172032	0.0380315	0.021453	0.0282912	0.00677306	0.00632142	0.0165741	0.0250726	0.00880696	0.00292218	0.0335218	0.0141128	0.0134087	0.0157379	0.0189478	0.02318	0.000569021	0.0179602	0.0131702	0.0135351	0.0233898	0.0085223	0.0253083	0.013459	0.0065096	0.00493719	0.00796214	0.0170953	0.0169467	0.0160362	0.008619	0.00964531	0.0110674	0.0262933
0.00365623	0.00900815	0.0101673	0.0110158	0.007458	0.00885216	0.00479527	0.0324376	0.0182639	0.0134463	0.0205251	0.0104869	0.0146475	0.0205568	0.00972727	0.0190381	0.017137	0.0382219	0.0212904	0.0275779	0.00646906	0.00686945	0.0169655	0.024662	0.00800499	0.0028537	0.0329278	0.014617	0.0138978	0.0152925	0.0192877	0.0234205	0.000670711	0.0180121	0.0133151	0.0134006	0.0235295	0.00926668	0.0249828	0.0132996	0.00660925	0.005426	0.00741767	0.0177206	0.0166174	0.0159057	0.00870846	0.00980983	0.0113687	0.0262516
0.00346292	0.00915427	0.0102872	0.0109437	0.00762441	0.00861012	0.00455072	0.0323632	0.018179	0.0134218	0.020158	0.0102325	0.0150166	0.0207334	0.00991466	0.0189906	0.0170751	0.0383759	0.0211205	0.0268704	0.00614082	0.00741943	0.0173396	0.0242458	0.00719445	0.00282852	0.0323359	0.0151364	0.0143948	0.014861	0.0196188	0.0236544	0.00140201	0.018096	0.0134441	0.0132559	0.0236464	0.0100101	0.0246278	0.0131331	0.00672141	0.00590927	0.00687996	0.0183823	0.0162675	0.0157682	0.00880943	0.00997161	0.0116987	0.0262079
0.00327271	0.00930316	0.0104085	0.0108541	0.0077748	0.00835016	0.00429932	0.0322697	0.0180646	0.0134058	0.0197759	0.0100138	0.0153749	0.0209264	0.0100992	0.0189382	0.0170278	0.0384991	0.0209399	0.0261773	0.0058006	0.0079793	0.0177042	0.0238447	0.00637923	0.00284703	0.0317523	0.0156508	0.0148869	0.0144445	0.0199323	0.0238962	0.00222637	0.0182231	0.0135632	0.0130946	0.0237616	0.0107586	0.0242637	0.0129586	0.00684343	0.00638472	0.00635442	0.0190611	0.0159009	0.0156131	0.00892597	0.0101411	0.012055	0.0261479
0.00311021	0.00945459	0.0105169	0.0107462	0.00790822	0.00808127	0.00403993	0.032164	0.0179265	0.0133957	0.0193776	0.00984392	0.015721	0.0210973	0.0102792	0.0188794	0.0169808	0.0385922	0.0207471	0.0254861	0.00545764	0.00853649	0.0180356	0.0234406	0.00557463	0.00290401	0.0311796	0.0161728	0.0153806	0.0140441	0.0202261	0.0241243	0.00307756	0.0183854	0.0136785	0.0129194	0.0238581	0.0114989	0.0238697	0.0127756	0.00696872	0.00684812	0.00584694	0.0197577	0.0155207	0.0154427	0.00904906	0.0103122	0.0124345	0.0260688
0.00296898	0.00961822	0.0106304	0.0106248	0.00802505	0.00780979	0.00378861	0.0320403	0.0177589	0.0134026	0.0189643	0.0097166	0.0160518	0.0212546	0.0104545	0.0188108	0.0169347	0.0386555	0.0205469	0.0248196	0.00510808	0.00909659	0.0183502	0.0230308	0.00479441	0.00299759	0.0306239	0.0166991	0.0158804	0.0136631	0.0205019	0.0243426	0.00394049	0.0185814	0.0137864	0.0127387	0.023946	0.0122354	0.0234368	0.0125791	0.00710877	0.0073025	0.00535607	0.020479	0.0151255	0.0152668	0.00918663	0.0104805	0.0128445	0.0259716
0.00283471	0.00978292	0.0107401	0.0104892	0.00812503	0.00753062	0.00352974	0.0318929	0.0175663	0.013417	0.0185262	0.00963712	0.0163651	0.0214294	0.0106267	0.0187333	0.0168907	0.0386753	0.0203416	0.0241802	0.00474406	0.00964892	0.0186582	0.0226254	0.00405715	0.00312098	0.0300914	0.0172193	0.0163787	0.0132977	0.0207661	0.0245522	0.00481484	0.0188209	0.0138747	0.0125493	0.0240088	0.0129625	0.0229929	0.012371	0.00725389	0.00774046	0.00488406	0.021211	0.0147304	0.0150716	0.00933013	0.0106511	0.0132846	0.0258588
0.00271185	0.00992307	0.0108349	0.0103419	0.00821099	0.00725234	0.00327252	0.0317221	0.0173512	0.0134349	0.0180852	0.00960535	0.0166515	0.0216034	0.0107923	0.0186619	0.0168328	0.0386522	0.020131	0.0235677	0.00438017	0.0102014	0.0189426	0.0222255	0.00341654	0.00326379	0.0295866	0.0177365	0.0168642	0.0129472	0.0210069	0.0247465	0.00570595	0.0190961	0.0139568	0.0123538	0.0240558	0.0136898	0.0225283	0.0121587	0.00740944	0.00815893	0.00443428	0.021958	0.0143016	0.0148621	0.00948396	0.0108157	0.0137395	0.0257345
0.00261878	0.0100447	0.0109197	0.0101839	0.00828404	0.00696051	0.00301603	0.0315314	0.0171046	0.0134689	0.0176215	0.00962231	0.0169259	0.0217706	0.0109537	0.0185813	0.0167742	0.0385981	0.0199208	0.0229771	0.00402041	0.0107477	0.0192032	0.0218374	0.00295973	0.00342729	0.0291084	0.0182614	0.0173546	0.0126289	0.0212342	0.0249318	0.00661413	0.0193966	0.0140331	0.0121496	0.0241067	0.0144296	0.0220428	0.0119359	0.00756902	0.00856426	0.00401295	0.0227195	0.0138514	0.0146539	0.00964531	0.010973	0.014209	0.0255761
0.00254025	0.0101673	0.0109914	0.0100121	0.00834401	0.00664725	0.00276526	0.0313242	0.0168378	0.0135194	0.0171325	0.00967871	0.0171784	0.0219365	0.0111163	0.018477	0.0167392	0.0385032	0.0197076	0.022431	0.00367717	0.0112841	0.0194447	0.021458	0.00277998	0.00361039	0.0286696	0.0187811	0.0178461	0.0123301	0.0214495	0.0250999	0.00752775	0.0197345	0.0140934	0.0119435	0.0241397	0.0151415	0.0215396	0.0117039	0.00773862	0.00895647	0.00362726	0.0234913	0.0133917	0.0144281	0.00980983	0.0111192	0.0146887	0.0253946
0.00247941	0.0102872	0.0110583	0.00982533	0.00839062	0.00634863	0.00253029	0.0311055	0.0165469	0.0135767	0.0166527	0.00978851	0.0174154	0.0221011	0.0112712	0.018379	0.016706	0.0383386	0.0194895	0.0219384	0.00335728	0.0118148	0.0196671	0.0210927	0.00294493	0.00380244	0.0282738	0.019289	0.0183346	0.0120481	0.0216412	0.0252552	0.00844125	0.0200981	0.01415	0.0117263	0.0241595	0.0158417	0.0210185	0.0114585	0.0079135	0.00933369	0.00327997	0.0242773	0.0129209	0.014203	0.00997161	0.0112563	0.0151788	0.0252016
0.00244621	0.0104085	0.0111102	0.00963048	0.00841025	0.00605003	0.0023065	0.0308728	0.0162408	0.013649	0.0161691	0.00994409	0.017626	0.0222539	0.0114162	0.0182938	0.0166713	0.0381561	0.0192646	0.0214996	0.00306951	0.0123479	0.0198774	0.0207449	0.00341487	0.00400206	0.0279251	0.0198024	0.0188175	0.0117885	0.0218203	0.0253888	0.00935642	0.0204881	0.0142048	0.011507	0.0241717	0.0165388	0.0204718	0.0112129	0.00809622	0.00969852	0.00298844	0.0250699	0.0124416	0.0139965	0.0101411	0.0113748	0.0156806	0.0250002
0.00242456	0.0105169	0.0111493	0.00941657	0.008412	0.00574904	0.00210246	0.0306222	0.0159162	0.0137361	0.0156817	0.0101426	0.0178009	0.0224029	0.0115563	0.018211	0.0166445	0.037938	0.0190333	0.0211132	0.00284039	0.0128824	0.020058	0.0204209	0.00410542	0.00420483	0.0276281	0.0203024	0.0192997	0.0115405	0.0219838	0.0255049	0.0102736	0.0209048	0.0142681	0.0112789	0.0241659	0.0172247	0.0199154	0.0109535	0.00827778	0.0100363	0.002751	0.0258732	0.0119464	0.0137698	0.0103122	0.0115248	0.0161902	0.0247904
0.00242191	0.0106304	0.011185	0.00919717	0.0084007	0.00544242	0.00192636	0.0303554	0.015562	0.0138413	0.0151915	0.0103856	0.0179616	0.0225451	0.0116883	0.0181308	0.0166092	0.0376724	0.0187926	0.0207804	0.00269045	0.0133849	0.0202303	0.0201036	0.00490034	0.00441188	0.0273891	0.0208044	0.0197678	0.0113122	0.0221373	0.025616	0.0111893	0.0213482	0.0142722	0.0110225	0.0241519	0.0178887	0.0193464	0.0106934	0.00846561	0.0103543	0.00258293	0.0266806	0.0114393	0.0135192	0.0104805	0.0116714	0.0166942	0.0245706
0.00244213	0.0107401	0.0112105	0.00896101	0.00836699	0.00513277	0.00179107	0.0300727	0.0151801	0.0139635	0.0146998	0.0106627	0.0180972	0.022681	0.011819	0.0180538	0.0165684	0.0373582	0.0185483	0.020511	0.00263505	0.0138787	0.0203797	0.0198028	0.00576524	0.00462379	0.0272083	0.0213137	0.0202405	0.0111088	0.0222724	0.0257118	0.0121041	0.0218223	0.0142574	0.0107594	0.0241198	0.0185398	0.0187622	0.0104276	0.00865912	0.0106486	0.0024753	0.0274812	0.0109192	0.0132601	0.0106511	0.0117906	0.0172092	0.024334
0.00248372	0.0108349	0.0112335	0.00871143	0.00832175	0.00482152	0.0017051	0.0297846	0.0147725	0.0141012	0.0142078	0.0109616	0.0182087	0.0228092	0.0119435	0.0179682	0.0165304	0.0370123	0.0183014	0.0203013	0.00268516	0.0143589	0.0205394	0.0195225	0.00667026	0.00482579	0.0270938	0.0218108	0.0207055	0.0109202	0.0223905	0.025807	0.0130252	0.0223192	0.0142326	0.0104995	0.0240734	0.0191765	0.0181569	0.0101375	0.00884677	0.0109411	0.00243736	0.0282833	0.0103849	0.0129892	0.0108157	0.0119064	0.017739	0.024091
0.00254231	0.0109197	0.0112381	0.00845479	0.00826705	0.00450987	0.00167835	0.029477	0.0143541	0.0142495	0.0137249	0.0112798	0.0182889	0.022928	0.0120577	0.0178864	0.0164954	0.0366309	0.0180451	0.0201538	0.0028457	0.0148314	0.0206758	0.0192663	0.00760881	0.00502431	0.0270472	0.0222917	0.021153	0.0107458	0.0224922	0.0258861	0.0139406	0.0228352	0.014193	0.0102428	0.0240181	0.0197926	0.0175335	0.00982879	0.00904362	0.0112415	0.00245775	0.0290904	0.0098407	0.0127227	0.010973	0.0120122	0.0182608	0.0238443
0.00261116	0.0109914	0.011205	0.00819159	0.00821644	0.00418741	0.00170655	0.0291447	0.0139334	0.0144092	0.0132536	0.0116242	0.0183398	0.023035	0.0121729	0.0178	0.0164617	0.0362148	0.017794	0.020073	0.00310183	0.0152905	0.0207425	0.019032	0.00856672	0.00522933	0.0270724	0.0227633	0.0216164	0.0106	0.0225792	0.0259222	0.0148566	0.0233607	0.0141551	0.00998104	0.0239516	0.0203893	0.0169035	0.0095173	0.00924218	0.0115131	0.00252899	0.0298924	0.00928401	0.0124657	0.0111192	0.0121134	0.0187926	0.0235823
0.00267944	0.0110583	0.0111643	0.00791616	0.00814215	0.00386274	0.00179578	0.0288019	0.0134926	0.014583	0.0128011	0.0119843	0.0183488	0.0231341	0.0122829	0.0177138	0.0164258	0.035763	0.0175373	0.020056	0.00344435	0.0157327	0.0207942	0.0188292	0.00952964	0.00543159	0.0271753	0.0232242	0.0220749	0.0104672	0.0226466	0.0259447	0.0157678	0.0239042	0.0141067	0.00971407	0.023865	0.0209676	0.0162536	0.00919867	0.00944247	0.0117691	0.00263423	0.0306835	0.00870991	0.0122024	0.0112563	0.0122076	0.0193086	0.0233199
0.00275074	0.0111102	0.0111227	0.00762842	0.00803716	0.00354107	0.00193679	0.0284519	0.0130285	0.0147759	0.0123639	0.0123581	0.0183219	0.0232249	0.0123994	0.0176312	0.0163963	0.035272	0.0172784	0.0201009	0.00384697	0.0161606	0.0208256	0.018648	0.0104947	0.00562595	0.0273416	0.0236729	0.0225157	0.0103543	0.0227033	0.0259508	0.0166717	0.0244555	0.0140523	0.0094332	0.0237685	0.0215256	0.0155959	0.00886043	0.0096436	0.0120208	0.00276172	0.0314711	0.00812619	0.0119351	0.0113748	0.0122952	0.0198154	0.0230475
0.00283711	0.0111493	0.011076	0.00733654	0.00792934	0.00322185	0.00211186	0.0280933	0.0125534	0.0149764	0.0119418	0.0127342	0.0182752	0.0233001	0.0124988	0.0175466	0.0163605	0.034736	0.0170169	0.0202071	0.00428783	0.0165741	0.0208533	0.0184868	0.0114619	0.00581576	0.027587	0.0241132	0.0229487	0.0102585	0.0227356	0.0259373	0.0175594	0.0250161	0.0139712	0.00914356	0.0236658	0.0220614	0.0149317	0.00852168	0.00984024	0.0122914	0.00290647	0.0322557	0.00752929	0.0116653	0.0115248	0.0123744	0.0203171	0.0227795
0.00293371	0.011185	0.0110158	0.00703793	0.00780802	0.00291384	0.00231829	0.0277188	0.012081	0.0151865	0.0115434	0.0131129	0.018199	0.0233671	0.0125718	0.0174648	0.0163208	0.0341454	0.0167505	0.0203722	0.00476463	0.0169655	0.0208657	0.0183516	0.0124212	0.00600027	0.0279001	0.0245319	0.0233716	0.0101721	0.0227571	0.0259013	0.0184346	0.0255901	0.013874	0.0088506	0.0235223	0.0225788	0.014251	0.00817657	0.010033	0.0125625	0.00304252	0.0330313	0.00692202	0.0113999	0.0116714	0.012441	0.0208109	0.0225115
0.00302416	0.0112105	0.0109437	0.00673402	0.00768053	0.00260788	0.0025387	0.0273393	0.0116074	0.0154067	0.0111599	0.0134983	0.0180925	0.0234284	0.0126452	0.0173743	0.0162803	0.033543	0.0164879	0.0205967	0.00526583	0.0173396	0.0208624	0.018237	0.0133725	0.00617286	0.0282743	0.0249425	0.0237812	0.01009	0.0227617	0.0258613	0.0192969	0.0261632	0.0137714	0.00855328	0.0233726	0.0230631	0.0135655	0.00782344	0.0102283	0.0128194	0.00317888	0.0337951	0.00629842	0.0111417	0.0117906	0.0125	0.021304	0.0222379
0.00312499	0.0112335	0.0108541	0.00642125	0.00754639	0.00231357	0.00277414	0.0269558	0.0111281	0.0156384	0.0108037	0.0138849	0.0179522	0.0234736	0.0127084	0.0172786	0.016241	0.0329158	0.0162267	0.0208683	0.00578422	0.0177042	0.0208384	0.0181472	0.0143167	0.00634232	0.0287063	0.0253423	0.0241878	0.0100172	0.0227642	0.0257854	0.0201442	0.0267488	0.0136613	0.00825073	0.0232181	0.0235312	0.0128731	0.00746537	0.0104238	0.013078	0.00330083	0.0345419	0.00566613	0.0108855	0.0119064	0.0125549	0.0217772	0.0219638
0.00322159	0.0112381	0.0107462	0.00611065	0.00739914	0.00203328	0.00301626	0.026565	0.0106563	0.0158791	0.0104944	0.0142687	0.0177641	0.0234999	0.0127641	0.0172032	0.0162025	0.0322574	0.0159451	0.0211914	0.00632142	0.0180356	0.0208026	0.0180839	0.0152451	0.00650562	0.029211	0.0257278	0.0245824	0.00995613	0.0227708	0.0256997	0.0209825	0.0273767	0.0135351	0.00794903	0.0230561	0.0239767	0.0121695	0.00709833	0.0106138	0.013346	0.00340768	0.0352777	0.00502352	0.0106336	0.0120122	0.0125937	0.0222538	0.0216959
0.00330488	0.011205	0.0106248	0.00579646	0.00724556	0.00179073	0.00326101	0.026173	0.0101914	0.0161328	0.0102178	0.0146475	0.0175498	0.023514	0.0128139	0.017137	0.0161589	0.0315759	0.015657	0.0215659	0.00686945	0.0183502	0.020749	0.0180413	0.0161557	0.00666038	0.0297806	0.0261031	0.0249715	0.0098872	0.0227247	0.0255975	0.0217964	0.0279744	0.0134006	0.00763324	0.02288	0.0243939	0.0114725	0.00672409	0.0107997	0.0136199	0.00348825	0.0359995	0.00437099	0.010388	0.0121134	0.0126369	0.0227147	0.021434
0.00338509	0.0111643	0.0104892	0.00547696	0.00708772	0.00158263	0.00350539	0.0257688	0.00974307	0.0163938	0.00997671	0.0150166	0.0173193	0.0235153	0.0128583	0.0170751	0.0161108	0.0308727	0.0153792	0.0219703	0.00741943	0.0186582	0.0206772	0.0180135	0.0170509	0.0068088	0.0303976	0.0264628	0.0253386	0.00982869	0.0226564	0.0254735	0.0225935	0.0285312	0.0132559	0.00731414	0.0226862	0.0247777	0.0107696	0.00634399	0.0109916	0.0139009	0.00354875	0.036701	0.0037129	0.0101539	0.0122076	0.0126718	0.0231619	0.0211756
0.00345914	0.0111227	0.0103419	0.00515261	0.00691458	0.00143018	0.00375012	0.0253488	0.00930721	0.0166614	0.00977504	0.0153749	0.0170442	0.0235031	0.0128928	0.0170278	0.0160589	0.0301432	0.0150915	0.0224151	0.0079793	0.0189426	0.0205947	0.0180053	0.0179216	0.00694353	0.0310526	0.0268075	0.0257082	0.0097774	0.0225684	0.0253342	0.0233685	0.0291117	0.0130946	0.0069967	0.0224801	0.0251408	0.0100558	0.00596051	0.0111714	0.0141945	0.00357902	0.0373875	0.00303902	0.00992726	0.0122952	0.0126982	0.0235953	0.0209272
0.00353146	0.011076	0.0101839	0.00482571	0.00673194	0.0013439	0.00399471	0.0249198	0.00889246	0.0169408	0.00961551	0.015721	0.016733	0.0234705	0.0129206	0.0169808	0.0160027	0.0293768	0.0147997	0.0228838	0.00853649	0.0192032	0.0204969	0.0180175	0.018771	0.00706703	0.0317425	0.0271341	0.0260838	0.00971352	0.0224816	0.0251692	0.0241208	0.0296965	0.0129194	0.00667379	0.0222591	0.0254774	0.00934663	0.0055704	0.0113495	0.0145062	0.00358985	0.0380436	0.00237282	0.00971072	0.0123744	0.0127152	0.024018	0.0206858
0.00360252	0.0110158	0.0100121	0.0044953	0.00654727	0.00134009	0.00423231	0.0244866	0.00851606	0.0172154	0.00950205	0.0160518	0.0164026	0.0234161	0.0129365	0.0169347	0.0159421	0.0285801	0.0145074	0.0233721	0.00909659	0.0194447	0.0203888	0.0180474	0.0196017	0.00718015	0.0324805	0.0274439	0.0264429	0.00964489	0.0223757	0.0249873	0.0248564	0.0302914	0.0127387	0.00635538	0.0220167	0.0257924	0.00863428	0.00517753	0.0115302	0.0148407	0.00357967	0.0386816	0.00170989	0.00950645	0.012441	0.0127269	0.0244323	0.020451
0.00367702	0.0109437	0.00982533	0.00416618	0.00636269	0.0014241	0.00446158	0.0240475	0.0081801	0.0174945	0.00943034	0.0163651	0.0160444	0.0233485	0.0129397	0.0168907	0.0158719	0.0277719	0.0142114	0.023886	0.00964892	0.0196671	0.0202586	0.0180854	0.0204016	0.00728364	0.0332517	0.0277393	0.0267937	0.00956408	0.0222492	0.0247922	0.0255633	0.0308849	0.0125493	0.0060341	0.0217538	0.0260776	0.00793285	0.00479096	0.0116967	0.0151997	0.00353294	0.039294	0.00107047	0.00932069	0.0125	0.0127328	0.0248264	0.0202282
0.00374963	0.0108541	0.00963048	0.0038409	0.00618558	0.00157918	0.00468123	0.023597	0.00789011	0.0177789	0.00939433	0.0166515	0.0156618	0.0232717	0.012928	0.0168328	0.0157866	0.0269425	0.0139117	0.0244105	0.0102014	0.0198774	0.0201179	0.0181373	0.0211759	0.00737896	0.0340716	0.028016	0.0271504	0.00947462	0.022123	0.0245871	0.0262729	0.0314736	0.0123538	0.00571584	0.0214781	0.0263479	0.00722806	0.00439731	0.0118666	0.015584	0.00346657	0.0398821	0.000630614	0.00915091	0.0125549	0.0127324	0.0252037	0.0200153
0.00382359	0.0107462	0.00941657	0.00352061	0.00599953	0.00177138	0.00489392	0.0231383	0.00765286	0.0180672	0.0093956	0.0169259	0.0152522	0.0231792	0.0129042	0.0167742	0.0157348	0.0260912	0.0136067	0.0249436	0.0107477	0.020058	0.0199663	0.0182024	0.0219186	0.00745649	0.0349201	0.0282729	0.0275041	0.00938185	0.0219764	0.024361	0.0269575	0.0320507	0.0121496	0.0053894	0.0211774	0.0266189	0.0065188	0.00400613	0.0120255	0.0159852	0.00336552	0.0404422	0.000853472	0.00899344	0.0125937	0.0127256	0.0255627	0.0198158
0.00389885	0.0106248	0.00919717	0.00320082	0.00581026	0.0020056	0.00509491	0.0226814	0.00748642	0.0183613	0.00941868	0.0171784	0.0148156	0.0230661	0.0128682	0.0167392	0.0157061	0.0252206	0.0133054	0.0254847	0.0112841	0.0202303	0.019803	0.0182765	0.0226329	0.00752552	0.0357726	0.0285025	0.0278242	0.00927446	0.0218236	0.024118	0.0275831	0.0326171	0.0119435	0.00507018	0.0208745	0.0268221	0.00582059	0.00361508	0.0121815	0.016416	0.00323586	0.0409771	0.00147523	0.00885074	0.0126369	0.012719	0.0259034	0.0196323
0.00397689	0.0104892	0.00896101	0.0028877	0.00563048	0.00225938	0.00528985	0.0222293	0.0073924	0.0186596	0.00948608	0.0174154	0.0143578	0.0229336	0.0128247	0.016706	0.0156358	0.0243368	0.0130075	0.0260237	0.0118148	0.0203797	0.0196214	0.0183479	0.0233176	0.00757599	0.0366243	0.0287182	0.0281377	0.00915847	0.0216498	0.0238551	0.0281924	0.0331751	0.0117263	0.00475923	0.020551	0.026979	0.00512354	0.00322314	0.0123352	0.0168819	0.00307468	0.0414856	0.0021786	0.0087306	0.0126718	0.0127048	0.0262249	0.0194625
0.00405608	0.0103419	0.00871143	0.00257822	0.00544615	0.00252567	0.00548777	0.0217705	0.00737102	0.0189556	0.0095692	0.017626	0.0138708	0.0227777	0.0127704	0.0166713	0.0155695	0.0234361	0.0126974	0.0265639	0.0123479	0.0205394	0.0194374	0.0184379	0.0239924	0.00760969	0.0374898	0.0289176	0.0284395	0.00903222	0.0214587	0.0235861	0.0287675	0.0337297	0.011507	0.00445286	0.0202068	0.0271109	0.00443871	0.00283757	0.0124827	0.0173764	0.00287781	0.0419608	0.00291106	0.00863163	0.0126982	0.0127059	0.0265281	0.0193036
0.00413433	0.0101839	0.00845479	0.00226977	0.00526392	0.00280702	0.00566898	0.0213128	0.00742238	0.01925	0.00968479	0.0178009	0.0133683	0.0226047	0.0126998	0.0166445	0.0155153	0.0225243	0.0123811	0.0270998	0.0128824	0.0206758	0.0192493	0.0185186	0.0246393	0.00763867	0.0383634	0.0290938	0.0287307	0.00889088	0.0212575	0.0232964	0.0293177	0.0342752	0.0112789	0.0041556	0.0198483	0.0272185	0.00376463	0.00246237	0.0126283	0.0178994	0.00265524	0.0424086	0.00366986	0.00855082	0.0127152	0.0127303	0.0268126	0.0191628
0.00421093	0.0100121	0.00819159	0.00198045	0.00508694	0.00309221	0.00582882	0.0208533	0.0075529	0.0195492	0.009832	0.0179616	0.0128519	0.0224108	0.0126185	0.0166092	0.0154438	0.0216055	0.0120663	0.0276241	0.0133849	0.0207425	0.0190507	0.0186079	0.025229	0.00765296	0.0392348	0.0292442	0.029005	0.00874133	0.0210524	0.0230134	0.0298339	0.0348101	0.0110225	0.00386587	0.0194754	0.0273047	0.00309344	0.00208062	0.0127623	0.0184559	0.00240103	0.0428192	0.00444351	0.00848809	0.0127269	0.0127078	0.0270802	0.0190331
0.00428527	0.00982533	0.00791616	0.00171117	0.00490716	0.00337616	0.0059792	0.0203919	0.00776959	0.0198488	0.00998652	0.0180972	0.0123175	0.0221996	0.0125152	0.0165684	0.0153482	0.020679	0.0117478	0.0281419	0.0138787	0.0207942	0.0188438	0.0186926	0.0257816	0.00765194	0.0401028	0.0293739	0.0292572	0.00857805	0.0208314	0.0227172	0.0303273	0.0353318	0.0107594	0.00358297	0.0190868	0.0273558	0.00243289	0.00173411	0.0128983	0.019039	0.00211584	0.0431939	0.00521751	0.00845101	0.0127328	0.012677	0.0273179	0.0189198
0.00436678	0.00963048	0.00762842	0.00146287	0.00474215	0.00365871	0.0061134	0.0199361	0.00805602	0.020154	0.0101502	0.0182087	0.0117807	0.021971	0.0124211	0.0165304	0.0152413	0.0197473	0.0114233	0.0286452	0.0143589	0.0208256	0.0186359	0.0187609	0.0262962	0.0076362	0.0409675	0.0295064	0.0294892	0.00840318	0.0206039	0.0224359	0.0307876	0.0358374	0.0104995	0.00331545	0.0186862	0.0273777	0.0017917	0.00139358	0.0130245	0.0196797	0.00179983	0.0435296	0.00600744	0.00843294	0.0127324	0.0126462	0.027535	0.0188245
0.00445093	0.00941657	0.00733654	0.00125104	0.00458603	0.00394021	0.00624032	0.0194801	0.00840736	0.0204584	0.0103091	0.0182889	0.0112373	0.0217215	0.0123154	0.0164954	0.0151392	0.0188108	0.0110942	0.0291342	0.0148314	0.0208533	0.0184107	0.018835	0.0267829	0.0076098	0.0418237	0.0296111	0.0297102	0.00821567	0.0203761	0.0221202	0.0311987	0.0363293	0.0102428	0.00306468	0.0182701	0.0273799	0.00117895	0.00106311	0.0131412	0.0203272	0.00145223	0.0438357	0.00679714	0.00843778	0.0127256	0.0126141	0.0277308	0.0187468
0.00453929	0.00919717	0.00703793	0.00109337	0.00443824	0.00421775	0.00635366	0.0190226	0.00880531	0.0207609	0.0104685	0.0183398	0.0106741	0.0214504	0.0121953	0.0164617	0.0150439	0.0178761	0.0107585	0.0296039	0.0152905	0.0208657	0.0181624	0.0189	0.0272349	0.00757012	0.0426688	0.0296859	0.0299269	0.00801556	0.0201413	0.0217604	0.0315939	0.0368045	0.00998104	0.002828	0.0178394	0.0273484	0.000621722	0.00084403	0.0132518	0.0209612	0.00107548	0.0441065	0.0075925	0.0084605	0.012719	0.0125845	0.0279066	0.0186865
0.00464087	0.00896101	0.00673402	0.00101153	0.00430487	0.00448207	0.00645703	0.0185641	0.00924604	0.021063	0.010628	0.0183488	0.0100984	0.0211655	0.0120753	0.0164258	0.0149402	0.0169512	0.0104254	0.0300489	0.0157327	0.0208624	0.0179425	0.0189656	0.0276472	0.00751635	0.0434978	0.0297392	0.030125	0.00780422	0.0198959	0.0214197	0.031952	0.0372678	0.00971407	0.00261537	0.0174008	0.0272938	0.000427437	0.000709051	0.0133561	0.0216424	0.000670283	0.0443424	0.00838351	0.00849827	0.0127048	0.0125569	0.0280584	0.0186379
0.00476372	0.00871143	0.00642125	0.00102428	0.00417435	0.00474532	0.006538	0.0181356	0.00973644	0.0213601	0.0107945	0.0183219	0.00951638	0.0208654	0.0119457	0.0163963	0.014827	0.0160363	0.0100918	0.0304752	0.0161606	0.0208384	0.017723	0.0190248	0.0280156	0.00744061	0.0442996	0.0297598	0.0302995	0.00757991	0.0196391	0.02108	0.0322736	0.0377129	0.0094332	0.00243115	0.0169467	0.0272162	0.0008446	0.000717436	0.0134581	0.0223583	0.000240293	0.0445344	0.0091829	0.00855101	0.0127059	0.0125288	0.0281868	0.0186092
0.00488749	0.00845479	0.00611065	0.00111327	0.00405632	0.0049846	0.00660697	0.0177263	0.0102527	0.0216581	0.0109467	0.0182752	0.00898245	0.0205488	0.0117755	0.0163605	0.0147111	0.0151238	0.00975912	0.0308776	0.0165741	0.0208026	0.0175008	0.0190673	0.028341	0.00735504	0.045081	0.0297603	0.0304522	0.00734688	0.0193742	0.0207423	0.0325629	0.0381424	0.00914356	0.00229706	0.0164837	0.0271061	0.00139278	0.000844169	0.0135542	0.0231002	0.0002514	0.0446872	0.00998105	0.008619	0.0127303	0.0125081	0.0282926	0.0185865
0.00500514	0.00819159	0.00579646	0.00126393	0.00394738	0.00521195	0.00665824	0.0173094	0.0107949	0.0219527	0.0110888	0.018199	0.00847855	0.020221	0.0115752	0.0163208	0.0145886	0.0142323	0.00943652	0.0312463	0.0169655	0.020749	0.0172866	0.0190932	0.0286274	0.00726087	0.0458343	0.0297433	0.0305959	0.00709672	0.019103	0.02039	0.0328137	0.0385537	0.0088506	0.00219357	0.0160151	0.0269695	0.0019413	0.00104219	0.0136443	0.0238715	0.000739962	0.0447941	0.0107856	0.00870846	0.0127078	0.012492	0.0283707	0.018583
0.0051318	0.00791616	0.00547696	0.00145882	0.00384621	0.00545892	0.0066905	0.0168915	0.0113612	0.0222516	0.0112148	0.0180925	0.00797766	0.0198747	0.0113811	0.0162803	0.0144662	0.0133632	0.00913633	0.0315943	0.0173396	0.0206772	0.0170618	0.0191126	0.0288699	0.00715743	0.0465577	0.0297062	0.0307242	0.00683967	0.0188267	0.0200423	0.033025	0.0389508	0.00855328	0.00212675	0.0155293	0.0268069	0.00249199	0.00126731	0.01373	0.0246645	0.00126408	0.0448607	0.0115922	0.00880943	0.012677	0.0124682	0.0284213	0.0185924
0.00525843	0.00762842	0.00515261	0.00166177	0.00376132	0.00570067	0.00671002	0.0164822	0.0119423	0.0225537	0.011332	0.0179522	0.00751042	0.0195053	0.0111793	0.016241	0.0143405	0.0125133	0.00881443	0.0319128	0.0177042	0.0205947	0.0168335	0.0191134	0.0290708	0.00704391	0.0472681	0.0296353	0.0308291	0.00657036	0.018549	0.0197053	0.0331995	0.0393212	0.00825073	0.00210014	0.0150319	0.0266231	0.00303311	0.00150527	0.0138148	0.0254712	0.00181283	0.0448891	0.0123962	0.00892597	0.0126462	0.0124534	0.0284468	0.0186106
0.00539355	0.00733654	0.00482571	0.00187531	0.00369082	0.00592634	0.00671314	0.0160845	0.0125368	0.0228503	0.0114271	0.0177641	0.00708945	0.0191233	0.0109638	0.0162025	0.01421	0.0116946	0.0084508	0.0322064	0.0180356	0.0204969	0.0166094	0.0191046	0.0292292	0.00691578	0.0479814	0.0295461	0.0309079	0.00630054	0.0182609	0.0193739	0.0333405	0.0396893	0.00794903	0.00211504	0.0145373	0.0264157	0.00355505	0.00173305	0.0138945	0.0262968	0.00239055	0.0448739	0.0131997	0.00904906	0.0126141	0.0124347	0.0284391	0.0186451
0.00553909	0.00703793	0.0044953	0.00209028	0.00363027	0.00613812	0.00671147	0.0156929	0.0131437	0.02314	0.0114933	0.0175498	0.00673971	0.0187271	0.0107332	0.0161589	0.014073	0.0109156	0.00812105	0.032469	0.0183502	0.0203888	0.0163919	0.0190786	0.0293543	0.00677674	0.0486148	0.0294427	0.0309546	0.00601845	0.0179502	0.0190479	0.0334552	0.0400361	0.00763324	0.00215656	0.0140334	0.0261765	0.0040661	0.00196527	0.0139642	0.0271438	0.00299765	0.0448288	0.0140001	0.00918663	0.0125845	0.0124192	0.0284122	0.0186842
0.00568726	0.00673402	0.00416618	0.00230565	0.00358533	0.00633567	0.00668667	0.0153074	0.0137516	0.023436	0.0115339	0.0173193	0.00647114	0.0183147	0.010496	0.0161108	0.0139366	0.0101801	0.00782263	0.032696	0.0186582	0.0202586	0.0161816	0.0190342	0.0294294	0.0066272	0.049196	0.0293232	0.0309851	0.00573256	0.0176372	0.0187329	0.0335298	0.0403477	0.00731414	0.00222241	0.0135331	0.025906	0.00455377	0.00217905	0.014031	0.0280094	0.00362942	0.0447354	0.0147977	0.00933013	0.0125569	0.0124116	0.0283671	0.0187268
0.00583901	0.00642125	0.0038409	0.00252834	0.00355649	0.00651994	0.00665014	0.0149325	0.0143519	0.0237224	0.0115519	0.0170442	0.00630083	0.0178939	0.0102415	0.0160589	0.0137946	0.00948967	0.00753915	0.0328826	0.0189426	0.0201179	0.0159816	0.0189734	0.029458	0.0064771	0.0497576	0.0291702	0.030994	0.00545029	0.0173239	0.0184188	0.0335643	0.0406341	0.0069967	0.00232583	0.0130269	0.0256173	0.00501972	0.00238628	0.0140985	0.0288873	0.00428095	0.0445972	0.0155859	0.00948396	0.0125288	0.0124116	0.0282938	0.0187767
0.00598805	0.00611065	0.00352061	0.00274718	0.00353543	0.00669687	0.00659655	0.0145727	0.014953	0.0240097	0.0115449	0.016733	0.00623967	0.0174518	0.00998116	0.0160027	0.0136502	0.00887308	0.0072679	0.033035	0.0192032	0.0199663	0.0157875	0.0188981	0.029445	0.00631985	0.0502596	0.0289899	0.0309602	0.00516706	0.0170219	0.0181184	0.0335608	0.0408796	0.00667379	0.00245018	0.0125233	0.0253083	0.00546906	0.00256778	0.0141625	0.0297734	0.0049521	0.0444209	0.016375	0.00964531	0.0125081	0.0124114	0.0281985	0.0188325
0.00614274	0.00579646	0.00320082	0.00296407	0.00352693	0.00686079	0.00653334	0.0142271	0.0155593	0.024305	0.0115261	0.0164026	0.00630461	0.0170014	0.00971487	0.0159421	0.0135034	0.00834234	0.00701132	0.0331669	0.0194447	0.019803	0.0156055	0.018805	0.0293882	0.00615244	0.0507216	0.0287872	0.0309132	0.00488941	0.0167144	0.0178337	0.0335228	0.0411107	0.00635538	0.00258837	0.01202	0.0249828	0.00589922	0.00273878	0.0142265	0.030664	0.00564777	0.0442131	0.0171545	0.00980983	0.012492	0.012416	0.0280769	0.018897
0.00631808	0.00547696	0.0028877	0.00317147	0.00352459	0.00700721	0.00646017	0.0138935	0.0161643	0.0245857	0.0114974	0.0160444	0.00647758	0.016537	0.00944791	0.0158719	0.0133552	0.00789303	0.00677737	0.0332554	0.0196671	0.0196214	0.0154397	0.0186962	0.0292779	0.00598961	0.051141	0.0285528	0.030841	0.00461671	0.0164042	0.0175657	0.0334507	0.041321	0.0060341	0.00273766	0.0115211	0.0246278	0.00631793	0.00289609	0.0142858	0.0315609	0.00636959	0.0439714	0.0179254	0.00997161	0.0124682	0.0124257	0.0279367	0.0189639
0.00649717	0.00515261	0.00257822	0.00337068	0.00352652	0.00713382	0.00636858	0.0135667	0.0167494	0.0248675	0.0114156	0.0156618	0.00675481	0.016065	0.0091702	0.0157866	0.0132003	0.00754155	0.00656097	0.0333051	0.0198774	0.0194374	0.0152903	0.0185718	0.0291325	0.00582772	0.051518	0.0283236	0.0307634	0.00437056	0.0160972	0.0173133	0.0333667	0.0415014	0.00571584	0.00288662	0.0110294	0.0242637	0.00671083	0.00303229	0.0143423	0.0324495	0.00710715	0.0436832	0.0186927	0.0101411	0.0124534	0.0124396	0.0277693	0.0190345
0.00667527	0.00482571	0.00226977	0.00356882	0.0035407	0.00724516	0.00626232	0.01326	0.0173165	0.0251437	0.0112908	0.0152522	0.00713104	0.0155893	0.00889219	0.0157348	0.0130603	0.00729576	0.00638095	0.0333225	0.020058	0.0192493	0.0151507	0.0184288	0.0289438	0.00566832	0.0518408	0.0280724	0.0306496	0.0041466	0.0157828	0.0170862	0.0332196	0.0416613	0.0053894	0.00303411	0.0105477	0.0238697	0.00707681	0.00315018	0.0143936	0.033333	0.00786458	0.0433556	0.0194422	0.0103122	0.0124347	0.0124568	0.0275835	0.0190994
0.00685463	0.0044953	0.00198045	0.0037567	0.00356487	0.0073504	0.0061537	0.0129675	0.0178719	0.0254039	0.0111452	0.0148156	0.00758325	0.0151016	0.00861493	0.0157061	0.0128924	0.00715914	0.00623212	0.0332996	0.0202303	0.0190507	0.0150286	0.0182652	0.028712	0.00551037	0.052115	0.0277774	0.0304596	0.00396175	0.01547	0.0168787	0.033003	0.0417918	0.00507018	0.00317582	0.0100902	0.0234368	0.00742378	0.00324642	0.0144509	0.0342312	0.00863784	0.0429982	0.0201813	0.0104805	0.0124192	0.0124832	0.0273657	0.0191593
0.00703676	0.00416618	0.00171117	0.00393278	0.00359812	0.00745045	0.00603004	0.0126775	0.0184219	0.025658	0.0109783	0.0143578	0.00810514	0.014602	0.00833419	0.0156358	0.0127051	0.0071362	0.00612373	0.0332434	0.0203797	0.0188438	0.0149213	0.0180828	0.0284381	0.00535897	0.0523379	0.0274566	0.0302431	0.0038182	0.0151556	0.0166875	0.0327745	0.0418963	0.00475923	0.00331029	0.00964864	0.0229929	0.00775448	0.00332978	0.0145018	0.0351322	0.0094294	0.0426049	0.0209191	0.0106511	0.0124116	0.0125102	0.0271201	0.0192139
0.0072183	0.0038409	0.00146287	0.0040836	0.00363745	0.00753394	0.00592073	0.0124071	0.0189577	0.0259146	0.0107885	0.0138708	0.00868283	0.014092	0.00805518	0.0155695	0.0125304	0.00721814	0.00604843	0.0331549	0.0205394	0.0186359	0.0148304	0.0178827	0.0281445	0.00522332	0.0525006	0.0271369	0.0300062	0.00373911	0.0148367	0.0165126	0.0325126	0.0419747	0.00445286	0.0034356	0.0092323	0.0225283	0.00806452	0.00339124	0.0145513	0.0360291	0.0102375	0.0421651	0.0216474	0.0108157	0.0124116	0.0125556	0.0268565	0.0192772
0.00739505	0.00352061	0.00125104	0.00421761	0.00367947	0.0075988	0.00578386	0.0121524	0.0194706	0.026162	0.0105708	0.0133683	0.00930081	0.0135745	0.00776928	0.0155153	0.012362	0.0073884	0.00600516	0.0330224	0.0206758	0.0184107	0.0147519	0.0176675	0.027794	0.00509066	0.0526192	0.0268046	0.0297617	0.00372071	0.0145276	0.016368	0.0322301	0.0420185	0.0041556	0.00355374	0.00884741	0.0220428	0.00835281	0.0034393	0.0146015	0.0369121	0.0110565	0.0416988	0.0223628	0.010973	0.0124114	0.0125984	0.0265671	0.0193327
0.00757845	0.00320082	0.00109337	0.00434467	0.00372534	0.00765135	0.00559973	0.0119164	0.0199632	0.0264039	0.0103209	0.0128519	0.0099532	0.0130557	0.00749255	0.0154438	0.0121913	0.00763806	0.00601456	0.0328481	0.0207425	0.0181624	0.0147007	0.0174371	0.0273516	0.00497106	0.0527067	0.0264527	0.0294963	0.00377627	0.014212	0.0162568	0.0319168	0.04203	0.00386587	0.00367004	0.00849057	0.0215396	0.00862305	0.00346122	0.0146459	0.0377867	0.0118874	0.0411966	0.0230581	0.0111192	0.012416	0.0126278	0.0262573	0.0193821
0.00775976	0.0028877	0.00101153	0.00445654	0.00377953	0.00768794	0.00543746	0.0116963	0.0204349	0.0266277	0.0100363	0.0123175	0.0106358	0.0125342	0.00722166	0.0153482	0.0120087	0.00795191	0.00607233	0.0326533	0.0207942	0.0179425	0.0146603	0.0171842	0.0268937	0.00486952	0.0527468	0.0260765	0.0291989	0.00390421	0.0138858	0.0161658	0.0315695	0.0420137	0.00358297	0.00377702	0.0081825	0.0210185	0.00886738	0.00346754	0.0146831	0.0386534	0.012727	0.0406469	0.0237326	0.0112563	0.0124257	0.0126775	0.0259266	0.0194226
0.00794678	0.00257822	0.00102428	0.00455833	0.00385137	0.00770668	0.00526905	0.0114884	0.020888	0.0268371	0.00972569	0.0117807	0.011334	0.0120048	0.00696722	0.0152413	0.0118246	0.00831561	0.00616409	0.0324277	0.0208256	0.017723	0.0146347	0.0169188	0.0263917	0.00479662	0.0527373	0.0256965	0.0288678	0.0040972	0.0135697	0.0161086	0.0311888	0.041959	0.00331545	0.00386807	0.0079243	0.0204718	0.0090973	0.00345822	0.0147221	0.0395035	0.0135735	0.0400747	0.0244034	0.0113748	0.0124396	0.0127409	0.0255722	0.0194551
0.00813012	0.00226977	0.00111327	0.00464021	0.00391436	0.0077112	0.00509751	0.0113043	0.0213182	0.0270462	0.00939179	0.0112373	0.0120373	0.0114724	0.0067276	0.0151392	0.0116327	0.00870645	0.00629689	0.0321603	0.0208533	0.0175008	0.0146332	0.016639	0.02586	0.00474805	0.0526728	0.0252604	0.0285023	0.00435326	0.0132486	0.016057	0.0307802	0.0418669	0.00306468	0.00393581	0.00771705	0.0199154	0.00929812	0.0034338	0.0147642	0.0403106	0.0144316	0.039465	0.0250533	0.0115248	0.0124568	0.0128154	0.0252019	0.0194825
0.00830668	0.00198045	0.00126393	0.00470606	0.00396798	0.00769887	0.00492226	0.0111385	0.0217289	0.0272482	0.00903251	0.0106741	0.0127484	0.0109335	0.00651534	0.0150439	0.011436	0.00912133	0.00647493	0.0318512	0.0208657	0.0172866	0.0146379	0.0163492	0.0252918	0.00471981	0.0525399	0.0247872	0.0281074	0.00465216	0.0129348	0.0160404	0.0303343	0.0417444	0.002828	0.00399468	0.00758337	0.0193464	0.00947276	0.00337434	0.0147973	0.0411037	0.0152936	0.0388236	0.025689	0.0116714	0.0124832	0.0128924	0.0248201	0.0194911
0.00848493	0.00171117	0.00145882	0.00476056	0.00403072	0.0076747	0.00475519	0.0109907	0.0221128	0.0274338	0.00865819	0.0100984	0.013462	0.01039	0.00633461	0.0149402	0.011239	0.00954478	0.00669326	0.0315043	0.0208624	0.0170618	0.0146626	0.0160489	0.0246854	0.00473331	0.0523534	0.0243349	0.0276867	0.00499319	0.0126162	0.0160633	0.0298692	0.0415877	0.00261537	0.00404514	0.00751397	0.0187622	0.0096507	0.00329597	0.0148232	0.0419101	0.0161617	0.0381561	0.0263151	0.0117906	0.0125102	0.0129762	0.0244167	0.0195048
0.00868193	0.00146287	0.00166177	0.00479933	0.0040934	0.00763496	0.00458957	0.0108583	0.0224706	0.0276144	0.00826515	0.00951638	0.0141763	0.00984487	0.00619552	0.014827	0.0110491	0.00997113	0.00694171	0.0311204	0.0208384	0.0168335	0.0147029	0.0157362	0.0240486	0.00477427	0.0521194	0.0238737	0.0272448	0.0053881	0.0123004	0.0161124	0.0293779	0.0413985	0.00243115	0.00408682	0.00752114	0.0181569	0.00980594	0.00320765	0.014846	0.0426984	0.0170354	0.0374543	0.0269123	0.0119064	0.0125556	0.0130609	0.0240003	0.0195014
0.0088672	0.00125104	0.00187531	0.00481974	0.0041621	0.00757564	0.00443537	0.0107464	0.0227991	0.0277863	0.00785167	0.00898245	0.0148773	0.00930383	0.00608421	0.0147111	0.0108567	0.0103893	0.00721806	0.0306905	0.0208026	0.0166094	0.0147569	0.0154096	0.0233764	0.00483983	0.0518345	0.0234081	0.0267803	0.00582436	0.0119873	0.0161808	0.0288568	0.0411707	0.00229706	0.00411416	0.00758991	0.0175335	0.00992503	0.00310007	0.0148921	0.0434657	0.0179101	0.0367167	0.0274968	0.0120122	0.0125984	0.0131544	0.0235755	0.0194907
0.00900815	0.00109337	0.00209028	0.00482593	0.00422826	0.00750695	0.004294	0.0106515	0.0231027	0.0279418	0.00742052	0.00847855	0.0155567	0.00876595	0.00599609	0.0145886	0.0106567	0.0108088	0.00751505	0.0302356	0.020749	0.0163919	0.0148168	0.0150718	0.0226779	0.00493883	0.0514999	0.0229183	0.0262806	0.00626792	0.0116669	0.0162662	0.0283115	0.040906	0.00219357	0.00412887	0.00773063	0.0169035	0.010029	0.00298304	0.0149296	0.0442025	0.0187875	0.0359485	0.0280621	0.0121134	0.0126278	0.0132465	0.0231349	0.0194705
0.00915427	0.00101153	0.00230565	0.00481631	0.00430152	0.00743068	0.00416149	0.0105721	0.023385	0.0280841	0.0069854	0.00797766	0.0162343	0.0082275	0.00596634	0.0144662	0.0104487	0.0112112	0.0078387	0.0297445	0.0206772	0.0161816	0.0149001	0.0147242	0.0219507	0.00506808	0.0511119	0.0224294	0.0257516	0.00672437	0.0113406	0.0163741	0.0277396	0.0406041	0.00212675	0.00413392	0.00794002	0.0162536	0.0101087	0.00284996	0.0149608	0.0449048	0.0196571	0.0351641	0.0286143	0.0122076	0.0126775	0.0133435	0.0226856	0.0194457
0.00930316	0.00102428	0.00252834	0.00478766	0.00437866	0.00733928	0.00404122	0.0105159	0.0236397	0.028203	0.00655533	0.00751042	0.0169027	0.00768578	0.00599333	0.0143405	0.010253	0.011595	0.00818538	0.0292193	0.0205947	0.0159816	0.0149923	0.0143733	0.0211909	0.00522651	0.0506796	0.0219307	0.0252017	0.00719585	0.0110144	0.0164945	0.027149	0.0402609	0.00210014	0.00412818	0.00821601	0.0155959	0.010176	0.00270384	0.0149937	0.0455698	0.0205259	0.0343582	0.0291388	0.0122952	0.0127409	0.0134479	0.0222302	0.0194048
0.00945459	0.00111327	0.00274718	0.00474317	0.00445164	0.00723169	0.00394227	0.0104874	0.0238715	0.0283108	0.00612613	0.00708945	0.0175545	0.00714454	0.00607665	0.01421	0.0100636	0.0119622	0.00855474	0.0286623	0.0204969	0.0157875	0.015088	0.0140164	0.0204053	0.00540788	0.0502098	0.0214261	0.0246291	0.00769189	0.0106903	0.0166278	0.0265277	0.039885	0.00211504	0.00411448	0.00853953	0.0149317	0.0102278	0.00255142	0.0150223	0.046199	0.0213899	0.0335258	0.0296476	0.0123744	0.0128154	0.013552	0.0217715	0.0193622
0.00961822	0.00126393	0.00296407	0.00468337	0.00451556	0.00710687	0.00386411	0.0104812	0.0240729	0.0283949	0.00573125	0.00673971	0.0181826	0.00661049	0.00620693	0.014073	0.00987149	0.0122994	0.00894349	0.0280765	0.0203888	0.0156055	0.0151981	0.0136578	0.019601	0.00561576	0.0496824	0.0209137	0.0240512	0.00819372	0.0103585	0.0167794	0.0258882	0.0394751	0.00215656	0.0040793	0.00891654	0.014251	0.0102623	0.00239633	0.0150524	0.0467982	0.0222494	0.0326662	0.0301267	0.012441	0.0128924	0.0136599	0.0213136	0.0193077
0.00978292	0.00145882	0.00317147	0.00460364	0.00457912	0.00697024	0.0038162	0.0104998	0.0242384	0.0284651	0.00539926	0.00647114	0.0187902	0.00608737	0.00638209	0.0139366	0.00967399	0.0126141	0.00933028	0.0274604	0.0202586	0.0154397	0.015311	0.0133067	0.0187769	0.00584142	0.0491018	0.0203974	0.0234419	0.00870591	0.0100341	0.0169402	0.0252217	0.0390269	0.00222241	0.00403404	0.0093265	0.0135655	0.0102794	0.00223902	0.0150814	0.0473688	0.0231001	0.031786	0.0305864	0.0125	0.0129762	0.0137777	0.0208566	0.0192349
0.00992307	0.00166177	0.00337068	0.00450754	0.00465847	0.00682377	0.00380713	0.0105387	0.0243705	0.0285321	0.00512075	0.00630083	0.0193785	0.00556792	0.00660341	0.0137946	0.00947979	0.0129037	0.00971815	0.0268112	0.0201179	0.0152903	0.0154311	0.0129491	0.0179431	0.00609111	0.0484694	0.0198694	0.0228069	0.00922405	0.00970471	0.0171135	0.0245412	0.0385378	0.00232583	0.00398976	0.00976646	0.0128731	0.0102715	0.00209628	0.0151079	0.0479097	0.0239481	0.0308907	0.0310209	0.0125549	0.0130609	0.0139061	0.0203963	0.0191565
0.0100447	0.00187531	0.00356882	0.00439613	0.00473802	0.00666518	0.00382225	0.0105946	0.0244752	0.0285934	0.00491346	0.00623967	0.0199317	0.00506458	0.00687037	0.0136502	0.00928644	0.0131643	0.0101176	0.0261331	0.0199663	0.0151507	0.015563	0.012596	0.0170981	0.00634777	0.0478002	0.0193415	0.0221601	0.00974204	0.00937299	0.0172927	0.0238495	0.0380091	0.00245018	0.00393222	0.0102524	0.0121695	0.0102544	0.00198074	0.0151415	0.0484179	0.0247824	0.0299818	0.031432	0.0125937	0.0131544	0.0140266	0.0199145	0.0190684
0.0101673	0.00209028	0.0037567	0.00427029	0.00482074	0.0064992	0.00386198	0.0106782	0.0245622	0.0286336	0.00481353	0.00630461	0.0204481	0.00458046	0.00717627	0.0135034	0.00911383	0.0134015	0.010526	0.0254196	0.019803	0.0150286	0.0157005	0.0122522	0.0162548	0.00662669	0.047092	0.0188135	0.0214964	0.0102707	0.00904672	0.0174676	0.0231523	0.0374479	0.00258837	0.00386049	0.0107569	0.0114725	0.0102298	0.0018998	0.0151686	0.0489028	0.0255985	0.0290646	0.0318255	0.0126369	0.0132465	0.014159	0.0194478	0.018977
0.0102872	0.00230565	0.00393278	0.00412515	0.00490379	0.0063242	0.00393475	0.0107817	0.0246202	0.0286559	0.0048361	0.00647758	0.0209488	0.00411097	0.00750858	0.0133552	0.0089589	0.0136033	0.0109365	0.0246959	0.0196214	0.0149213	0.0158371	0.0119126	0.0154166	0.00691471	0.04633	0.0182791	0.0208111	0.0107906	0.00871942	0.0176589	0.0224328	0.0368441	0.00273766	0.00378261	0.0112805	0.0107696	0.0101858	0.00186524	0.015192	0.0493646	0.0264063	0.028143	0.0321936	0.0126718	0.0133435	0.0143008	0.0189948	0.0188671
0.0104085	0.00252834	0.0040836	0.00396605	0.00498286	0.00613279	0.00403561	0.0109132	0.0246618	0.0286627	0.00498354	0.00675481	0.0214162	0.00366053	0.00786947	0.0132003	0.00880282	0.0137778	0.011355	0.0239507	0.0194374	0.0148304	0.0159797	0.0115872	0.0145887	0.00720957	0.0455293	0.0177511	0.0201118	0.0113063	0.00838604	0.0178448	0.0217152	0.0362059	0.00288662	0.00369705	0.0118184	0.0100558	0.0101274	0.00192324	0.015221	0.0497656	0.0271984	0.0272148	0.032563	0.0126982	0.0134479	0.0144352	0.0185506	0.0187628
0.0105169	0.00274718	0.00421761	0.00379703	0.00506604	0.0059303	0.00416251	0.0110696	0.0246602	0.0286514	0.00526371	0.00713104	0.0218473	0.00324502	0.00825357	0.0130603	0.00865775	0.0139162	0.0117704	0.023172	0.0192493	0.0147519	0.0161242	0.0112711	0.0137812	0.00751626	0.0446878	0.0172188	0.0194022	0.0118267	0.00805627	0.0180383	0.0209724	0.035533	0.00303411	0.00360375	0.0123638	0.00934663	0.0100639	0.00207143	0.0152421	0.0501323	0.0279766	0.0262569	0.0329142	0.0127152	0.013552	0.0145764	0.0181304	0.0186541
0.0106304	0.00296407	0.00434467	0.00360866	0.00515435	0.00572322	0.00432559	0.0112437	0.0246154	0.0286281	0.00566926	0.00758325	0.0222623	0.0028723	0.00865484	0.0128924	0.00852089	0.0140219	0.0121807	0.0223661	0.0190507	0.0147007	0.0162658	0.0109713	0.0130113	0.00781928	0.0438045	0.0166887	0.0186552	0.0123409	0.007729	0.0182242	0.0202215	0.034819	0.00317582	0.00350042	0.0129189	0.00863428	0.00999315	0.00229301	0.0152683	0.0504723	0.0287348	0.0252839	0.0332415	0.0127269	0.0136599	0.0147249	0.0177246	0.0185397
0.0107401	0.00317147	0.00445654	0.00341398	0.00524175	0.00550373	0.00450937	0.0114403	0.0245542	0.0285888	0.00617852	0.00810514	0.0226324	0.00256216	0.00907153	0.0127051	0.0084036	0.0140989	0.0125829	0.021537	0.0188438	0.0146603	0.0164115	0.0106939	0.0122796	0.00813882	0.0428839	0.016161	0.0179075	0.0128532	0.00740171	0.0183974	0.0194971	0.034072	0.00331029	0.00339134	0.0134827	0.00793285	0.00991999	0.00258941	0.015293	0.0507745	0.0294801	0.0243197	0.03354	0.0127328	0.0137777	0.0148776	0.0173441	0.018404
0.0108349	0.00337068	0.00455833	0.00321282	0.00533964	0.00527677	0.00471046	0.0116622	0.0244522	0.0285312	0.00677732	0.00868283	0.022964	0.00233737	0.00950349	0.0125304	0.00830942	0.0141382	0.0129924	0.0206893	0.0186359	0.0146347	0.0165511	0.0104347	0.0116131	0.00846422	0.0419233	0.015636	0.01716	0.0133561	0.00707662	0.0185705	0.0187744	0.0332919	0.0034356	0.00327846	0.0140461	0.00722806	0.0098445	0.00294581	0.015319	0.0510392	0.0302039	0.023355	0.033835	0.0127324	0.0139061	0.015032	0.0169899	0.018266
0.0109197	0.00356882	0.00464021	0.00300548	0.00544014	0.00504166	0.00491276	0.0119045	0.0243297	0.0284554	0.00744711	0.00930081	0.0232517	0.00220981	0.00995589	0.012362	0.0082361	0.0141457	0.0134014	0.0198207	0.0184107	0.0146332	0.0166855	0.0101942	0.011001	0.00878564	0.0409211	0.0151124	0.0163991	0.0138483	0.00674959	0.0187236	0.0180687	0.0324712	0.00355374	0.00316097	0.0146108	0.0065188	0.0097737	0.00335663	0.0153386	0.0512657	0.0309066	0.0223881	0.0340831	0.0127256	0.0140266	0.0151872	0.0166636	0.0181304
0.0109914	0.0037567	0.00470606	0.00280989	0.00554459	0.00479527	0.00515915	0.0121654	0.0241736	0.0283595	0.00817844	0.0099532	0.0235048	0.00220345	0.0104081	0.0121913	0.00819953	0.0141206	0.0138075	0.0189389	0.0181624	0.0146379	0.0168165	0.00998564	0.0104933	0.00912097	0.0398876	0.0146005	0.0156343	0.0143393	0.00642477	0.0188667	0.0173645	0.0316254	0.00367004	0.00304043	0.0151665	0.00582059	0.0097023	0.0038071	0.0153664	0.0514637	0.0315887	0.0214191	0.0342906	0.012719	0.014159	0.0153478	0.0163684	0.0179906
0.0110583	0.00393278	0.00476056	0.00262806	0.00565934	0.00455072	0.00541704	0.0124459	0.0239876	0.0282393	0.00895445	0.0106358	0.0237158	0.00229874	0.010857	0.0120087	0.0082056	0.0140754	0.0142069	0.0180437	0.0179425	0.0146626	0.0169444	0.00981191	0.0101228	0.00945241	0.0388106	0.0141097	0.0148538	0.0148155	0.00610482	0.0189994	0.0166761	0.0307439	0.00377702	0.0029163	0.0157183	0.00512354	0.00963779	0.00429328	0.0153872	0.0516163	0.0322417	0.0204569	0.0344774	0.0127048	0.0143008	0.0155124	0.0161152	0.0178507
0.0111102	0.0040836	0.00479933	0.00247011	0.00580437	0.00429932	0.00568528	0.0127432	0.0237827	0.0281129	0.00977801	0.011334	0.0238848	0.00248544	0.011304	0.0118246	0.00824504	0.0139973	0.0146027	0.0171334	0.017723	0.0147029	0.017069	0.00968471	0.0098829	0.00977407	0.0376839	0.0136326	0.014077	0.0152862	0.00578564	0.0191141	0.0160052	0.0298268	0.00386807	0.00279397	0.016268	0.00443871	0.00958986	0.00481381	0.0154095	0.0517202	0.0328694	0.0194945	0.0346406	0.0127059	0.0144352	0.015676	0.0159061	0.0177059
0.0111493	0.00421761	0.00481974	0.00234781	0.00595621	0.00403993	0.00595986	0.0130506	0.0235515	0.0279701	0.0106326	0.0120373	0.0240228	0.00274874	0.0117538	0.0116327	0.00832435	0.0138871	0.0149845	0.0162073	0.0175008	0.0147569	0.0171832	0.0095915	0.00977776	0.0101064	0.0365173	0.0131438	0.0132946	0.0157441	0.00546744	0.0192171	0.0153618	0.0288917	0.00393581	0.00268491	0.0168028	0.00376463	0.00955318	0.00536	0.0154347	0.0517733	0.033472	0.0185444	0.0347755	0.0127303	0.0145764	0.0158367	0.0157391	0.0175649
0.011185	0.00434467	0.00482593	0.0022697	0.00607834	0.00378861	0.00622075	0.0133811	0.0232904	0.0278132	0.0114925	0.0127484	0.0241167	0.00305405	0.0122116	0.011436	0.00843961	0.0137476	0.015355	0.0152737	0.0172866	0.0148168	0.0172945	0.00950832	0.00982	0.0104312	0.0353155	0.0126877	0.0125031	0.0161918	0.00515523	0.0193105	0.014759	0.0279277	0.00399468	0.00258974	0.0173244	0.00309344	0.00953287	0.00593831	0.0154471	0.0517949	0.0340584	0.017609	0.0348831	0.0127078	0.0147249	0.0160075	0.0156167	0.0174263
0.0112105	0.00445654	0.00481631	0.00225663	0.00622085	0.00352974	0.00649453	0.0137325	0.023001	0.027641	0.0123698	0.013462	0.0241635	0.00338799	0.0126595	0.011239	0.008599	0.0135818	0.0157243	0.0143288	0.0170618	0.0149001	0.0173945	0.00946868	0.0100175	0.010754	0.0340826	0.0122812	0.0117156	0.0166292	0.00484386	0.0193749	0.0142012	0.026937	0.00404514	0.00250551	0.0178366	0.00243289	0.00953937	0.00653394	0.0154679	0.05178	0.034607	0.0166898	0.0349767	0.012677	0.0148776	0.0161758	0.015545	0.017292
0.0112335	0.00455833	0.00478766	0.00231176	0.00636808	0.00327252	0.00676517	0.0140935	0.0226914	0.0274683	0.0132594	0.0141763	0.0241611	0.00372878	0.0131108	0.0110491	0.00880093	0.0133923	0.0160728	0.0133717	0.0168335	0.0149923	0.0174894	0.00946283	0.0103527	0.011072	0.0328212	0.0118913	0.0109235	0.0170509	0.004543	0.0194268	0.013688	0.0259132	0.00408682	0.00244204	0.0183354	0.0017917	0.00956712	0.00715669	0.015502	0.0517378	0.0351317	0.0157897	0.035042	0.0126462	0.015032	0.0163505	0.0155196	0.0171572
0.0112381	0.00464021	0.00474317	0.00244611	0.0065212	0.00301603	0.00704615	0.0144662	0.0223549	0.0272628	0.014175	0.0148773	0.0241263	0.00407806	0.0135624	0.0108567	0.00905296	0.0131818	0.0164152	0.0124152	0.0166094	0.015088	0.0175827	0.00948893	0.0108131	0.0113877	0.0315368	0.0115267	0.010138	0.0174515	0.00424771	0.0194597	0.0132328	0.0248554	0.00411416	0.0024102	0.0188251	0.00117895	0.00962263	0.00780705	0.0155655	0.0516584	0.0356382	0.0149156	0.0350856	0.0126141	0.0151872	0.016525	0.0155411	0.0170311
0.011205	0.00470606	0.00468337	0.00265588	0.00669894	0.00276526	0.00731718	0.0148473	0.0219912	0.0270103	0.0150956	0.0155567	0.024043	0.00442149	0.0140027	0.0106567	0.00935564	0.0129335	0.0167467	0.0114532	0.0163919	0.0151981	0.0176632	0.00954737	0.0113876	0.0116911	0.0302304	0.0111894	0.00935762	0.0178467	0.00395289	0.0194634	0.0128417	0.023777	0.00412887	0.00241717	0.0192927	0.000621722	0.00971001	0.00848812	0.0155956	0.0515441	0.0361063	0.014063	0.0350996	0.0125845	0.0153478	0.0166985	0.0156075	0.0169136
0.0111643	0.00476056	0.00460364	0.00293013	0.00688256	0.00253029	0.00758241	0.0152363	0.0216021	0.0267491	0.0160157	0.0162343	0.023921	0.00476175	0.0144328	0.0104487	0.00969915	0.0126601	0.0170667	0.0104879	0.0161816	0.015311	0.0177329	0.0096318	0.0120636	0.01199	0.0288988	0.0108787	0.0085922	0.0182191	0.00366237	0.0194556	0.0125193	0.0226786	0.00413392	0.00246579	0.0197446	0.000427437	0.00982191	0.00916321	0.0156031	0.0513986	0.0365404	0.0132456	0.0350945	0.0125569	0.0155124	0.0168774	0.0157247	0.0168028
0.0111227	0.00479933	0.00450754	0.00325815	0.0070704	0.0023065	0.00784465	0.0156373	0.0211878	0.0264791	0.0169508	0.0169027	0.0237605	0.00509427	0.0148498	0.010253	0.0100901	0.0123694	0.0173778	0.00953592	0.0159816	0.0154311	0.0177957	0.00974429	0.0128107	0.0122774	0.0275562	0.0106075	0.00785171	0.01858	0.00338132	0.0194324	0.0122742	0.021559	0.00412818	0.00255811	0.0201777	0.0008446	0.00997371	0.00982644	0.0156164	0.0512162	0.0369455	0.0124683	0.0350554	0.0125288	0.015676	0.0170532	0.0158835	0.0166956
0.011076	0.00481974	0.00439613	0.00362295	0.00727118	0.00210246	0.00808765	0.0160452	0.0207529	0.0262052	0.0178891	0.0175545	0.0235609	0.00540945	0.0152535	0.0100636	0.0105252	0.0120537	0.0176809	0.00858725	0.0157875	0.015563	0.0178508	0.00987271	0.0136093	0.0125583	0.0262052	0.0103718	0.00712774	0.0189478	0.00311883	0.0193854	0.0121143	0.020427	0.00411448	0.00269164	0.0205871	0.00139278	0.010158	0.0105055	0.0156287	0.0510041	0.0373158	0.0117266	0.0349931	0.0125081	0.0158367	0.0172334	0.0160889	0.0165995
0.0110158	0.00482593	0.00427029	0.00403443	0.00747543	0.00192636	0.0083328	0.0164604	0.0202944	0.0259114	0.018838	0.0181826	0.0233206	0.00571273	0.0156536	0.00987149	0.0110017	0.011723	0.0179717	0.00764612	0.0156055	0.0157005	0.0178882	0.0100199	0.0144549	0.0128344	0.0248437	0.0101702	0.00643687	0.0192877	0.00286884	0.0193092	0.0120299	0.019269	0.0040793	0.00286772	0.0209858	0.0019413	0.0103735	0.0112047	0.0156495	0.0507595	0.0376546	0.0110403	0.0349094	0.012492	0.0160075	0.0174074	0.0163378	0.0165141
0.0109437	0.00481631	0.00412515	0.00447588	0.00768671	0.00179107	0.00857392	0.0168936	0.0198172	0.0256033	0.0197892	0.0187902	0.0230332	0.00600441	0.0160333	0.00967399	0.0115176	0.0113825	0.01825	0.00674427	0.0154397	0.0158371	0.0179148	0.0101801	0.0153503	0.0130993	0.023489	0.0100094	0.00579538	0.0196188	0.00263234	0.0192102	0.0120338	0.0181032	0.00403404	0.00308698	0.0213656	0.00249199	0.0106276	0.011919	0.0156625	0.0504813	0.0379694	0.0104098	0.0347957	0.0124682	0.0161758	0.017587	0.0166215	0.0164391
0.0108541	0.00478766	0.00396605	0.00495125	0.00791444	0.0017051	0.00879851	0.0173313	0.0193278	0.025284	0.0207329	0.0193785	0.0227152	0.00628447	0.0164046	0.00947979	0.0120766	0.0110246	0.0185117	0.00588418	0.0152903	0.0159797	0.0179327	0.0103609	0.0162658	0.0133571	0.0221513	0.00988976	0.00521707	0.0199323	0.00240455	0.0190882	0.012109	0.0169288	0.00398976	0.00334537	0.0217282	0.00303311	0.010912	0.0126429	0.015681	0.0501781	0.0382363	0.00984456	0.0346657	0.0124534	0.0163505	0.0177613	0.0169144	0.0163807
0.0107462	0.00474317	0.00379703	0.0054517	0.00814202	0.00167835	0.00901394	0.0177688	0.0188085	0.0249456	0.0216607	0.0199317	0.0223589	0.0065467	0.0167649	0.00928644	0.0126733	0.0106621	0.0187578	0.00509721	0.0151507	0.0161242	0.017941	0.0105602	0.0171921	0.0136026	0.0208283	0.00980614	0.004722	0.0202261	0.00218405	0.0189412	0.0122593	0.0157522	0.00393222	0.00363524	0.0220688	0.00355505	0.0112252	0.0133781	0.0157002	0.049846	0.0384743	0.00935269	0.0345063	0.0124347	0.016525	0.017938	0.017261	0.016336
0.0106248	0.00468337	0.00360866	0.00595679	0.00838437	0.00170655	0.00922381	0.0182093	0.0182752	0.0245882	0.0225779	0.0204481	0.0219666	0.00678721	0.0171071	0.00911383	0.0133088	0.0102904	0.0189967	0.00442396	0.0150286	0.0162658	0.0179405	0.0107541	0.0181292	0.013832	0.0195339	0.00976713	0.00434051	0.0205019	0.00198327	0.0187668	0.012488	0.0145733	0.00386049	0.00395126	0.0223824	0.0040661	0.0115741	0.0141377	0.0157195	0.0494825	0.0386874	0.00893555	0.0343122	0.0124192	0.0166985	0.0181158	0.0176779	0.0163077
0.0104892	0.00460364	0.00341398	0.00647645	0.00862495	0.00179578	0.00941448	0.0186435	0.0177325	0.0242152	0.0234921	0.0209488	0.021537	0.00700623	0.017441	0.0089589	0.0139764	0.00991052	0.0192217	0.00391335	0.0149213	0.0164115	0.0179256	0.0109503	0.0190744	0.0140423	0.0183124	0.00977244	0.00410093	0.0207661	0.00180011	0.0185742	0.0127866	0.0133851	0.00378261	0.00429704	0.0226799	0.00455377	0.0119574	0.0148942	0.0157382	0.0490945	0.0388629	0.00860535	0.0341134	0.0124116	0.0168774	0.0182866	0.0181027	0.0162969
0.0103419	0.00450754	0.00321282	0.0070112	0.00886508	0.00193679	0.00959586	0.0190762	0.0171999	0.0238246	0.0243964	0.0214162	0.021082	0.00720878	0.0177583	0.00880282	0.0146811	0.00953061	0.0194368	0.00364893	0.0148304	0.0165511	0.0178993	0.0111545	0.0200146	0.0142434	0.0171697	0.00983671	0.00401746	0.0210069	0.00164112	0.0183503	0.0131433	0.0122024	0.00369705	0.00466613	0.0229564	0.00501972	0.0123574	0.0156434	0.0157589	0.048678	0.0390268	0.00834762	0.0338945	0.0124116	0.0170532	0.0184592	0.0185458	0.0162997
0.0101839	0.00439613	0.00300548	0.00756101	0.00910777	0.00211186	0.00976956	0.0195079	0.0166278	0.023416	0.0252937	0.0218473	0.0205978	0.00738881	0.0180588	0.00865775	0.0154115	0.0091491	0.0196335	0.00368387	0.0147519	0.0166855	0.0178614	0.0113566	0.020942	0.014428	0.0161161	0.00992721	0.00410452	0.0212342	0.00150967	0.0181033	0.0135446	0.0110288	0.00360375	0.0050536	0.0232051	0.00546906	0.0127793	0.0163941	0.015771	0.0482474	0.0391537	0.00813836	0.0336447	0.0124114	0.0172334	0.018627	0.0189889	0.016318
0.0100121	0.00427029	0.00280989	0.00812936	0.00934575	0.00231829	0.00992837	0.0199367	0.0160135	0.0229871	0.0261838	0.0222623	0.0200796	0.00755544	0.0183366	0.00852089	0.0161644	0.00877962	0.0198013	0.00400305	0.0147007	0.0168165	0.0178129	0.0115639	0.0218628	0.0145947	0.0151801	0.0100422	0.00434683	0.0214495	0.00140444	0.0178378	0.0139841	0.00987025	0.00350042	0.00546394	0.0234303	0.00589922	0.0132244	0.0171446	0.0157853	0.0477941	0.0392258	0.00806084	0.0333664	0.012416	0.0174074	0.0188005	0.0194514	0.016351
0.00982533	0.00412515	0.00262806	0.00870634	0.00959025	0.0025387	0.0100689	0.0203607	0.0154087	0.0225455	0.0270554	0.0226324	0.0195378	0.00769398	0.0186069	0.0084036	0.0169505	0.00841947	0.0199545	0.00454119	0.0146603	0.0169444	0.0177513	0.0117582	0.0227743	0.0147452	0.0144059	0.0101756	0.00470531	0.0216412	0.00133788	0.0175414	0.0144524	0.00873766	0.00339134	0.00590009	0.0236312	0.00631793	0.013683	0.0178963	0.0158049	0.0473257	0.0392731	0.00806704	0.0330655	0.0124257	0.017587	0.0189707	0.0199192	0.0164017
0.00963048	0.00396605	0.00247011	0.00930576	0.00983463	0.00277414	0.010197	0.0207822	0.014795	0.0220944	0.0279113	0.022964	0.0189766	0.00780751	0.0188591	0.00830942	0.0177585	0.00808068	0.0200912	0.00523326	0.0146347	0.017069	0.0176763	0.0119467	0.0236672	0.0148823	0.0138269	0.0103323	0.00515303	0.0218203	0.00130912	0.0172259	0.0149477	0.00764936	0.00327846	0.00634593	0.0238112	0.00671083	0.0141568	0.0186361	0.0158185	0.0468403	0.0392829	0.00813875	0.0327348	0.0124396	0.0177613	0.0191319	0.0203984	0.0164613
0.00941657	0.00379703	0.00234781	0.00992567	0.0100741	0.00301626	0.0103119	0.0212026	0.0141791	0.0216319	0.0287507	0.0232517	0.0184117	0.00790329	0.0190824	0.0082361	0.0185893	0.00777214	0.0202111	0.00602841	0.0146332	0.0171832	0.0175865	0.0121294	0.0245356	0.0149985	0.013477	0.0105133	0.00566255	0.0219838	0.00131305	0.0168905	0.0154654	0.00663955	0.00316097	0.00680616	0.0239661	0.00707681	0.0146404	0.0193735	0.0158326	0.0463399	0.0392613	0.00828251	0.0323423	0.0124568	0.017938	0.0192926	0.0208784	0.0165366
0.00919717	0.00360866	0.0022697	0.0105405	0.0103194	0.00326101	0.0104057	0.02161	0.0135548	0.0211546	0.029567	0.0235048	0.0178348	0.00798255	0.0192828	0.00819953	0.0194362	0.00750313	0.0203163	0.00687977	0.0146379	0.0172945	0.0174838	0.0123132	0.0253861	0.0151071	0.0133907	0.0107139	0.00621265	0.0221373	0.0013475	0.0165271	0.0159959	0.00573551	0.00304043	0.00727616	0.0240984	0.00742378	0.0151395	0.0201088	0.0158454	0.0458214	0.039211	0.0084716	0.0319439	0.0124832	0.0181158	0.0194483	0.0213625	0.016621
0.00896101	0.00341398	0.00225663	0.0111709	0.0105574	0.00350539	0.0104857	0.0220159	0.012936	0.0206597	0.0303671	0.0237158	0.0172434	0.00805348	0.0194683	0.0082056	0.0203059	0.00727693	0.0204108	0.0077709	0.0146626	0.0173945	0.0173692	0.0124697	0.0262096	0.0152085	0.0135538	0.0109381	0.0067891	0.0222724	0.00140868	0.0161396	0.0165289	0.00500341	0.0029163	0.00775336	0.0242079	0.00775448	0.0156395	0.0208605	0.0158519	0.0452898	0.0391297	0.00870753	0.0315467	0.0125102	0.0182866	0.0195954	0.0218585	0.0167101
0.00871143	0.00321282	0.00231176	0.0118022	0.0107902	0.00375012	0.0105502	0.0224278	0.0123145	0.0201462	0.0311437	0.0238848	0.0166491	0.00809345	0.0196274	0.00824504	0.0211953	0.00710232	0.0204913	0.00868551	0.0147029	0.0174894	0.0172464	0.0126212	0.0270114	0.0153106	0.013962	0.0111772	0.00738076	0.0223905	0.00149093	0.0157204	0.0170783	0.00454222	0.00279397	0.00824898	0.0242967	0.00806452	0.0161445	0.021603	0.0158556	0.0447603	0.0390142	0.0089689	0.0311384	0.0125556	0.0184592	0.0197476	0.0223439	0.0168078
0.00845479	0.00300548	0.00244611	0.0124424	0.0110321	0.00399471	0.0105975	0.0228324	0.0116961	0.0196185	0.0318944	0.0240228	0.0160577	0.00809959	0.019767	0.00832435	0.0221039	0.00698636	0.0205491	0.00959535	0.0147569	0.0175827	0.0171146	0.0127983	0.0277794	0.0153824	0.0145935	0.0114286	0.00797629	0.0224922	0.0015881	0.0152709	0.0176146	0.00441907	0.00268491	0.00875589	0.0243624	0.00835281	0.0166556	0.0223148	0.0158562	0.0442143	0.0388689	0.00924955	0.0307042	0.0125984	0.018627	0.0198993	0.0228211	0.0169433
0.00819159	0.00280989	0.00265588	0.0130953	0.0112472	0.00423231	0.0106413	0.023204	0.0110835	0.0190744	0.0326314	0.0241167	0.0154726	0.00808224	0.0198999	0.00843961	0.0230298	0.00693565	0.0205854	0.0105186	0.0148168	0.0176632	0.0169621	0.0129161	0.0285169	0.015427	0.0154311	0.011678	0.00857248	0.0225792	0.00169581	0.0148111	0.0181398	0.00466443	0.00258974	0.0092637	0.0244008	0.00862305	0.0171617	0.0230024	0.015854	0.0436614	0.0386923	0.00953661	0.030246	0.0126278	0.0188005	0.0200465	0.0232886	0.0170923
0.00791616	0.00262806	0.00293013	0.0137516	0.0114504	0.00446158	0.0106923	0.0235707	0.0104783	0.0185073	0.0333451	0.0241635	0.014909	0.00804496	0.0200228	0.008599	0.0239633	0.00695784	0.0206003	0.011441	0.0149001	0.0177329	0.0168013	0.0130047	0.0292229	0.0154592	0.0164457	0.011936	0.00915965	0.0226466	0.00181374	0.014333	0.0186732	0.00521976	0.00250551	0.00977545	0.0244151	0.00886738	0.0176703	0.0237104	0.0158485	0.0431045	0.0384848	0.00983096	0.0297789	0.0126775	0.0189707	0.0201908	0.0237495	0.0172415
0.00762842	0.00247011	0.00325815	0.014414	0.011657	0.00468123	0.0107094	0.0239311	0.009891	0.0179508	0.0340376	0.0241611	0.0143731	0.00798218	0.0201182	0.00880093	0.0249065	0.00704977	0.0205958	0.012355	0.0149923	0.0177957	0.0166332	0.0130796	0.0298937	0.0154764	0.0175771	0.0121929	0.00972698	0.0227033	0.00193155	0.0138355	0.019186	0.00599458	0.00244204	0.0103031	0.0244099	0.0090973	0.0181954	0.0243986	0.0158391	0.0425457	0.038251	0.0101316	0.029292	0.0127409	0.0191319	0.0203282	0.0241974	0.0174024
0.00733654	0.00234781	0.00362295	0.0150821	0.0118607	0.00489392	0.0106857	0.0242739	0.00932632	0.0173668	0.034704	0.0241263	0.0138718	0.0079167	0.0201841	0.00905296	0.0258676	0.00720954	0.0205731	0.0132586	0.015088	0.0178508	0.0164524	0.0131363	0.0305342	0.0154867	0.0188077	0.0124506	0.0102791	0.0227356	0.00205115	0.0133238	0.0196815	0.00690888	0.0024102	0.0108155	0.0243806	0.00929812	0.0187127	0.0250467	0.0158388	0.0419904	0.0379874	0.0104265	0.0287968	0.0128154	0.0192926	0.0204662	0.0246321	0.0175623
0.00703793	0.0022697	0.00403443	0.0157542	0.012054	0.00509491	0.0106416	0.0245982	0.00879573	0.016758	0.0353352	0.024043	0.0134192	0.00784562	0.0202246	0.00935564	0.026842	0.00744256	0.0205285	0.0141486	0.0151981	0.0178882	0.0162626	0.0131765	0.0311382	0.0154758	0.0201413	0.0127126	0.0108094	0.0227571	0.00217981	0.0127988	0.0201709	0.0079079	0.00241717	0.0113286	0.0243318	0.00947276	0.0192016	0.0256836	0.0158171	0.041432	0.0376941	0.0107234	0.0282695	0.0128924	0.0194483	0.020599	0.0250522	0.0177293
0.00673402	0.00225663	0.00447588	0.0164316	0.0122342	0.00528985	0.010585	0.0249125	0.00830022	0.0161771	0.0359319	0.023921	0.0130287	0.00774043	0.0202399	0.00969915	0.0278292	0.00773481	0.0204638	0.0150299	0.015311	0.0179148	0.0160725	0.0131965	0.031702	0.0154544	0.0215533	0.0129759	0.0113216	0.0227617	0.00229143	0.0122408	0.0206282	0.00896103	0.00246579	0.0118455	0.0242555	0.0096507	0.0196886	0.0263143	0.0157801	0.0408814	0.0373683	0.0110084	0.0277153	0.0129762	0.0195954	0.0207237	0.0254554	0.017907
0.00642125	0.00231176	0.00495125	0.0171199	0.0124073	0.00548777	0.0105196	0.025221	0.00785496	0.0155828	0.0365255	0.0237605	0.0127063	0.00762485	0.0202339	0.0100901	0.0288505	0.00807914	0.0203873	0.0159094	0.0154311	0.0179327	0.0158692	0.0132016	0.0322234	0.0154155	0.0229995	0.0132315	0.011808	0.0227642	0.00241169	0.0116655	0.0210628	0.0100411	0.00255811	0.0123641	0.0241607	0.00980594	0.0201644	0.0269235	0.0157461	0.0403362	0.0370168	0.0112728	0.0271535	0.0130609	0.0197476	0.0208366	0.025845	0.0180891
0.00611065	0.00244611	0.0054517	0.0178135	0.0125738	0.00566898	0.0104471	0.025505	0.00746449	0.0149709	0.0371096	0.0235609	0.0124628	0.00748956	0.0202037	0.0105252	0.029858	0.00847326	0.0202888	0.0167827	0.015563	0.017941	0.015654	0.0131908	0.0327086	0.0153649	0.0244657	0.0134801	0.0122698	0.0227708	0.00254327	0.0110799	0.0214841	0.0111427	0.00269164	0.0128754	0.0240509	0.00992503	0.0206385	0.0275059	0.0157143	0.0397938	0.0366332	0.0115232	0.0265829	0.0131544	0.0198993	0.0209486	0.0262121	0.0182701
0.00579646	0.00265588	0.00595679	0.0185076	0.012725	0.00582882	0.0103725	0.0257682	0.00714409	0.0143452	0.0376403	0.0233206	0.0123102	0.00732986	0.0201519	0.0110017	0.030849	0.00890721	0.0201727	0.0176152	0.0157005	0.0179405	0.0154325	0.0131693	0.0331466	0.0153064	0.025943	0.0137144	0.0127043	0.0227247	0.00266093	0.0104812	0.0218755	0.0122522	0.00286772	0.013375	0.0239112	0.010029	0.0210941	0.0280742	0.0156767	0.0392546	0.0362281	0.011753	0.0260069	0.0132465	0.0200465	0.0210561	0.0265503	0.0184586
0.00547696	0.00293013	0.00647645	0.0192041	0.0128609	0.0059792	0.0102921	0.0260196	0.00690277	0.0136701	0.0381428	0.0230332	0.0122521	0.00715864	0.0200802	0.0115176	0.0318473	0.00937803	0.0200305	0.0184351	0.0158371	0.0179256	0.0152016	0.0131236	0.033538	0.0152313	0.0274299	0.0139334	0.0131099	0.0226564	0.00277752	0.00987116	0.0222422	0.0133652	0.00308698	0.0138661	0.0237482	0.0101087	0.0215315	0.0286131	0.0156368	0.0387248	0.0357992	0.0119666	0.0254241	0.0133435	0.0201908	0.0211508	0.0268739	0.0186407
0.00515261	0.00325815	0.0070112	0.0199077	0.0129867	0.0061134	0.0102025	0.0262766	0.00675743	0.012992	0.0386112	0.0227152	0.0122975	0.00697554	0.0199858	0.0120766	0.0328547	0.00987638	0.0198635	0.0192275	0.0159797	0.0178993	0.0149765	0.0130583	0.0338908	0.0151392	0.02893	0.014152	0.0134921	0.0225684	0.00288868	0.00923306	0.0225865	0.0144635	0.00334537	0.014365	0.023558	0.010176	0.0219579	0.0291379	0.0155915	0.0381986	0.0353407	0.0121569	0.0248347	0.0134479	0.0203282	0.0212398	0.0271749	0.0188259
0.00482571	0.00362295	0.00756101	0.0206131	0.0131001	0.00624032	0.0101095	0.0265094	0.00670964	0.0123346	0.0390534	0.0223589	0.0124472	0.00678508	0.0198713	0.0126733	0.033872	0.0103883	0.0196798	0.0200048	0.0161242	0.0178614	0.0147418	0.0129693	0.034203	0.0150419	0.0304236	0.0143527	0.0138374	0.0224816	0.00299785	0.00858113	0.0228974	0.0155418	0.00363524	0.0148817	0.0233558	0.0102278	0.0223657	0.0296311	0.0155357	0.0377041	0.0348499	0.0123276	0.0242342	0.013552	0.0204662	0.0213248	0.0274717	0.0190065
0.0044953	0.00403443	0.00812936	0.0213259	0.0132073	0.00635366	0.01002	0.0267163	0.00675949	0.0116697	0.0394595	0.0219666	0.0126932	0.00658927	0.0197469	0.0133088	0.0348787	0.0109126	0.0194812	0.0207614	0.0162658	0.0178129	0.0145095	0.0128658	0.0344659	0.0149337	0.0319072	0.0145344	0.0141572	0.0223757	0.00310097	0.00793717	0.0231794	0.0166122	0.00395126	0.0153642	0.023131	0.0102623	0.0227578	0.0301079	0.0154784	0.0372254	0.0343466	0.0124726	0.0236302	0.0136599	0.020599	0.0214038	0.0277368	0.019188
0.00416618	0.00447588	0.00870634	0.0220383	0.0133012	0.00645703	0.00992979	0.0269064	0.00689998	0.0110035	0.0398367	0.021537	0.0130442	0.006377	0.0195982	0.0139764	0.0358736	0.0114535	0.0192714	0.021497	0.0164115	0.0177513	0.0142758	0.0127389	0.0346862	0.0148157	0.0333842	0.0147116	0.014445	0.0222492	0.00319653	0.00730675	0.0234231	0.0176652	0.00429704	0.0158383	0.0228871	0.0102794	0.0231379	0.0305632	0.0154107	0.0367463	0.0338194	0.012603	0.0230268	0.0137777	0.0207237	0.021475	0.0279606	0.0193637
0.0038409	0.00495125	0.00930576	0.0227513	0.0133854	0.006538	0.00983242	0.0270778	0.007132	0.0103327	0.0401866	0.021082	0.0134858	0.00614662	0.019429	0.0146811	0.0368621	0.0120043	0.019044	0.0222131	0.0165511	0.0176763	0.0140408	0.0125955	0.0348635	0.0146879	0.034825	0.0148737	0.0146899	0.022123	0.00329221	0.00669247	0.0236435	0.0187022	0.00466613	0.0163019	0.022622	0.0102715	0.023495	0.0309909	0.015338	0.0362858	0.0332936	0.0127048	0.0224097	0.0139061	0.0208366	0.0215487	0.0281611	0.0195402
0.00352061	0.0054517	0.00992567	0.0234615	0.0134501	0.00660697	0.00973156	0.0272285	0.00747287	0.00966398	0.040496	0.0205978	0.0140106	0.00590489	0.0192401	0.0154115	0.037865	0.0125475	0.0188014	0.0229058	0.0166855	0.0175865	0.0138066	0.0124329	0.0349946	0.0145513	0.0362394	0.015026	0.0149035	0.0219764	0.00338089	0.00610867	0.0238262	0.019714	0.0050536	0.0167599	0.0223391	0.0102544	0.0238246	0.0313931	0.0152572	0.0358373	0.0327208	0.0127944	0.0217989	0.0140266	0.0209486	0.021618	0.028337	0.0197093
0.00320082	0.00595679	0.0105405	0.0241741	0.013508	0.00665824	0.00965397	0.0273603	0.00786336	0.00899518	0.0407739	0.0200796	0.0146137	0.0056583	0.0190308	0.0161644	0.0388736	0.0130873	0.0185383	0.0235679	0.0168165	0.0174838	0.0135759	0.0122518	0.0350778	0.0144001	0.0376342	0.0151601	0.0150843	0.0218236	0.00345843	0.0055699	0.0239736	0.0207053	0.00546394	0.017202	0.0220468	0.0102298	0.0241419	0.0317686	0.0151655	0.0354088	0.0320898	0.0128769	0.0211889	0.014159	0.0210561	0.0216766	0.0284853	0.0198729
0.0028877	0.00647645	0.0111709	0.0248836	0.0135616	0.0066905	0.00958048	0.0274742	0.00829095	0.00832365	0.0410174	0.0195378	0.0152785	0.00540134	0.0188074	0.0169505	0.0398682	0.0136209	0.0182577	0.024204	0.0169444	0.0173692	0.0133454	0.0120543	0.0351128	0.0142444	0.0390044	0.0152792	0.0152317	0.0216498	0.00353535	0.00508995	0.0240975	0.0216698	0.00590009	0.0176253	0.0217385	0.0101858	0.0244366	0.0321155	0.0150644	0.034998	0.0314642	0.012919	0.0205713	0.0143008	0.0211508	0.0217305	0.028609	0.0200266
0.00257822	0.0070112	0.0118022	0.0256162	0.0136041	0.00671002	0.00949947	0.0275727	0.00876902	0.00764827	0.0412335	0.0189766	0.0159901	0.00512988	0.0185707	0.0177585	0.0408584	0.014161	0.0179666	0.0248114	0.017069	0.0172464	0.0131172	0.0118412	0.0351063	0.0140842	0.0403408	0.0153806	0.015344	0.0214587	0.0036043	0.0047018	0.0241807	0.0226121	0.00634593	0.0180414	0.0214265	0.0101274	0.0247126	0.0324341	0.0149582	0.034603	0.0308266	0.0129335	0.0199562	0.0144352	0.0212398	0.0217784	0.0287078	0.0201807
0.00226977	0.00756101	0.0124424	0.0263655	0.0136306	0.00671314	0.00942733	0.0276519	0.0092864	0.0069713	0.0414129	0.0184117	0.0167379	0.00486161	0.0183142	0.0185893	0.0418382	0.0147181	0.0176634	0.0253895	0.0171832	0.0171146	0.0128901	0.0116104	0.0350567	0.0139133	0.041645	0.0154754	0.0154289	0.0212575	0.00367422	0.00442465	0.0242317	0.0235299	0.00680616	0.0184369	0.0210813	0.0100639	0.0249645	0.0327261	0.0148462	0.0342221	0.030178	0.0129246	0.0193404	0.0145764	0.0213248	0.021822	0.0287807	0.0203134
0.00198045	0.00812936	0.0130953	0.0270723	0.0136356	0.00671147	0.0093637	0.0277165	0.00984002	0.0063007	0.0415618	0.0178348	0.017528	0.00460055	0.0180473	0.0194362	0.0428061	0.0152541	0.0173459	0.0259407	0.0172945	0.0169621	0.0126609	0.0113589	0.0349514	0.013745	0.04292	0.0155494	0.0154738	0.0210524	0.00373606	0.00429528	0.0242499	0.0244173	0.00727616	0.0188159	0.0207113	0.00999315	0.0251859	0.0329885	0.0147246	0.0338619	0.0295138	0.0128923	0.0187599	0.0147249	0.0214038	0.0218602	0.0288239	0.0204482
0.00171117	0.00870634	0.0137516	0.0277729	0.0136308	0.00668667	0.00931288	0.0277743	0.0104136	0.00562666	0.0416693	0.0172434	0.0183614	0.00433888	0.0177712	0.0203059	0.0437635	0.0157745	0.0170093	0.0264573	0.0173945	0.0168013	0.0124395	0.0111012	0.0348053	0.013567	0.0441629	0.0156108	0.0154687	0.0208314	0.00378623	0.00433495	0.0242255	0.0252692	0.00775336	0.0191826	0.0203346	0.00991999	0.0253862	0.0332267	0.0145993	0.0335103	0.0288406	0.0128461	0.0182071	0.0148776	0.021475	0.021889	0.0288373	0.0205721
0.00146287	0.00930576	0.014414	0.0284756	0.0136128	0.00665014	0.00927259	0.0278458	0.0110033	0.00496027	0.0417461	0.0166491	0.0192199	0.00406923	0.017482	0.0211953	0.0446983	0.0162841	0.0166676	0.0269514	0.0174894	0.0166332	0.0122256	0.0108425	0.0346265	0.0134025	0.0453824	0.0156608	0.0154317	0.0206039	0.0038422	0.00454327	0.0241642	0.0260937	0.00824898	0.0195296	0.0199382	0.0098445	0.0255636	0.0334333	0.0144705	0.0331729	0.0281514	0.0127807	0.0176358	0.015032	0.0215487	0.0219111	0.0288323	0.0206966
0.00125104	0.00992567	0.0150821	0.0291807	0.013589	0.00659655	0.00925447	0.0278689	0.0116039	0.0043073	0.0417929	0.0160577	0.0200855	0.00379555	0.0171805	0.0221039	0.0456282	0.0167744	0.0163226	0.0274097	0.0175827	0.0164524	0.0120259	0.0105817	0.0343942	0.0131913	0.0465536	0.0156818	0.015363	0.0203761	0.00388593	0.00490543	0.0240723	0.0268874	0.00875589	0.0198583	0.0195365	0.0097737	0.0257051	0.0336046	0.0143246	0.0328516	0.0274526	0.0126936	0.017052	0.0151872	0.021618	0.0219275	0.0287996	0.0208388
0.00109337	0.0105405	0.0157542	0.0298819	0.0135581	0.00653334	0.00925476	0.027845	0.0122212	0.00366909	0.041814	0.0154726	0.0209588	0.00351796	0.0168833	0.0230298	0.0465567	0.0172506	0.0159636	0.027842	0.0176632	0.0162626	0.0118207	0.0102818	0.034095	0.0129376	0.0476756	0.01569	0.0152585	0.0201413	0.00392674	0.00538795	0.0239429	0.0276476	0.0092637	0.0201697	0.019118	0.0097023	0.0258297	0.0337508	0.0141676	0.0325369	0.026742	0.0125938	0.01648	0.0153478	0.0216766	0.0219445	0.0287288	0.0209181
0.00101153	0.0111709	0.0164316	0.0305685	0.0135134	0.00646017	0.00927395	0.0278238	0.0128354	0.00305136	0.0418065	0.014909	0.021837	0.00323731	0.0165828	0.0239633	0.0474804	0.0177046	0.0156015	0.0282457	0.0177329	0.0160725	0.0116303	0.00998044	0.0337451	0.0127039	0.0487496	0.015688	0.0151215	0.0198959	0.0039684	0.0059594	0.0237784	0.0283685	0.00977545	0.0204586	0.0186905	0.00963779	0.0259313	0.0338684	0.0140077	0.0322344	0.0260247	0.0124755	0.0159261	0.0155124	0.0217305	0.0219522	0.0286314	0.0209796
0.00102428	0.0118022	0.0171199	0.031255	0.0134565	0.00636858	0.00931348	0.0277931	0.0134428	0.00245108	0.0417722	0.0143731	0.0227153	0.00294434	0.0162735	0.0249065	0.0483849	0.0181479	0.015235	0.0286253	0.0177957	0.0158692	0.0114476	0.0096817	0.0333556	0.0124684	0.049794	0.015671	0.0149573	0.0196391	0.00400155	0.00660943	0.0235769	0.0290512	0.0103031	0.0207397	0.0182544	0.00958986	0.0260384	0.0339577	0.0138405	0.031957	0.0253003	0.0123442	0.0153907	0.015676	0.0217784	0.021955	0.0285074	0.0210263
0.00111327	0.0124424	0.0178135	0.0319307	0.0133879	0.00626232	0.00936639	0.0277676	0.0140534	0.00189504	0.0417011	0.0138718	0.0235839	0.00268816	0.0159661	0.0258676	0.0492681	0.0185746	0.014863	0.0289589	0.0178508	0.015654	0.0112752	0.00938044	0.0329278	0.0122399	0.0508055	0.0156336	0.0147574	0.0193742	0.00402803	0.0073178	0.0233433	0.0297029	0.0108155	0.0209908	0.0178044	0.00955318	0.0260972	0.0340114	0.0136644	0.0316816	0.0245729	0.0122007	0.0148787	0.0158367	0.021822	0.0219527	0.0283479	0.0210665
0.00126393	0.0130953	0.0185076	0.0326083	0.0133114	0.0061537	0.00943962	0.0277285	0.014655	0.00142456	0.0415975	0.0134192	0.0244523	0.00244545	0.0156557	0.026842	0.0501336	0.0189885	0.014488	0.0292776	0.0178882	0.0154325	0.011107	0.00908835	0.0324721	0.0119975	0.0517735	0.015594	0.014529	0.019103	0.00405833	0.00805748	0.0230723	0.0303203	0.0113286	0.0212281	0.0173544	0.00953287	0.0260806	0.0340298	0.0134835	0.0314179	0.0238437	0.0120413	0.0143888	0.0160075	0.0218602	0.0219367	0.028173	0.0210967
0.00145882	0.0137516	0.0192041	0.0332851	0.0132249	0.00603004	0.00952878	0.0276857	0.0152482	0.00112449	0.0414632	0.0130287	0.0253016	0.00217787	0.0153494	0.0278292	0.050983	0.0193793	0.0141157	0.0295601	0.0179148	0.0152016	0.0109431	0.008796	0.0319708	0.0117514	0.0527026	0.0155255	0.0142652	0.0188267	0.00408726	0.00882819	0.0227687	0.0308988	0.0118455	0.0214414	0.0168876	0.00953937	0.0260557	0.0340191	0.0132974	0.0311578	0.0231122	0.011869	0.0139227	0.0161758	0.021889	0.0219199	0.0279666	0.0211204
0.00166177	0.014414	0.0199077	0.0339548	0.0131324	0.00592073	0.00964343	0.0276316	0.0158266	0.00111191	0.0413162	0.0127063	0.0261331	0.00191272	0.0150546	0.0288505	0.0518129	0.0197468	0.0137361	0.0298377	0.0179327	0.0149765	0.0107924	0.00852108	0.0314224	0.0114931	0.0536071	0.0154426	0.0139715	0.018549	0.0041168	0.0096124	0.0224269	0.0314336	0.0123641	0.0216358	0.0164166	0.00956712	0.0260073	0.0339743	0.013105	0.0308773	0.0223794	0.0116779	0.0134872	0.0163505	0.0219111	0.0218975	0.0277333	0.0211238
0.00187531	0.0150821	0.0206131	0.0346156	0.0130363	0.00578386	0.00977331	0.0275776	0.0163939	0.00138387	0.0411364	0.0124628	0.0269482	0.00164484	0.0147733	0.029858	0.0526217	0.0201015	0.0133595	0.0300601	0.017941	0.0147418	0.0106514	0.00824663	0.0308368	0.0112221	0.0544914	0.0153384	0.013642	0.0182609	0.00414951	0.0104161	0.0220622	0.0319345	0.0128754	0.0218067	0.0159485	0.00962263	0.0259401	0.0339069	0.0129087	0.0305917	0.021647	0.0114693	0.0130822	0.016525	0.0219275	0.0218608	0.0274791	0.0211198
0.00209028	0.0157542	0.0213259	0.0352627	0.0129333	0.00559973	0.00991778	0.0275134	0.0169531	0.00180142	0.04089	0.0123102	0.0277455	0.00138784	0.0145013	0.030849	0.0534267	0.0204388	0.0129954	0.0302082	0.0179405	0.0145095	0.0105269	0.00797924	0.030214	0.0109474	0.0553243	0.0152298	0.0132869	0.0179502	0.0041778	0.0112268	0.0216651	0.0324015	0.013375	0.0219629	0.0154719	0.00971001	0.0258525	0.0337992	0.0126985	0.0303076	0.0209202	0.0112522	0.0126991	0.0166985	0.0219445	0.0218243	0.0272001	0.0211071
0.00230565	0.0164316	0.0220383	0.0359022	0.0128206	0.00543746	0.010078	0.0274458	0.0174902	0.0022778	0.0406305	0.0122521	0.0285173	0.00113977	0.0142504	0.0318473	0.0542281	0.0207431	0.0126328	0.0303398	0.0179256	0.0142758	0.0104087	0.00772867	0.0295576	0.0106597	0.0560925	0.0151115	0.0128985	0.0176372	0.00421393	0.0120477	0.0212356	0.0328291	0.0138661	0.0220949	0.0149933	0.00982191	0.0257406	0.0336658	0.0124759	0.0300142	0.0202048	0.0110198	0.0123364	0.0168774	0.0219522	0.0217836	0.0268983	0.0210752
0.00252834	0.0171199	0.0227513	0.0365401	0.0126997	0.00526905	0.0102437	0.0273795	0.0180109	0.00276567	0.0403468	0.0122975	0.0292604	0.0008984	0.0140172	0.0328547	0.0550137	0.0210174	0.0122804	0.0304436	0.0178993	0.0140408	0.0103074	0.00750203	0.0288687	0.0103801	0.0568013	0.0149652	0.0124774	0.0173239	0.00425513	0.0128717	0.020778	0.0332211	0.014365	0.0222195	0.0145142	0.00997371	0.0255924	0.0334993	0.0122505	0.0297327	0.0194911	0.0107839	0.0120031	0.0170532	0.021955	0.0217315	0.0265708	0.0210316
0.00274718	0.0178135	0.0234615	0.0371726	0.0125752	0.00509751	0.0104249	0.0273121	0.0185143	0.00326281	0.0400383	0.0124472	0.029966	0.000662637	0.0138076	0.033872	0.0557722	0.0212701	0.0119397	0.0305406	0.0178614	0.0138066	0.0102179	0.00729965	0.0281538	0.0100955	0.0574741	0.0148086	0.0120413	0.0170219	0.00430017	0.0136914	0.020292	0.0335711	0.0148817	0.0223423	0.0140369	0.010158	0.0254244	0.0333026	0.0120224	0.0294532	0.018786	0.010545	0.0117015	0.0172334	0.0219527	0.0216728	0.0262231	0.0209693
0.00296407	0.0185076	0.0241741	0.0377905	0.0124519	0.00492226	0.0106178	0.027239	0.0190009	0.00375283	0.0397063	0.0126932	0.0306392	0.00043554	0.0136215	0.0348787	0.0565122	0.0215054	0.0116109	0.030605	0.0178129	0.0135759	0.0101394	0.00712938	0.0274121	0.00979031	0.0581175	0.0146313	0.0115869	0.0167144	0.00434598	0.0145147	0.0197847	0.0338884	0.0153642	0.022398	0.0135663	0.0103735	0.0252239	0.0330798	0.0117842	0.0291578	0.0180993	0.0102979	0.0114285	0.0174074	0.0219367	0.0216038	0.0258574	0.0208937
0.00317147	0.0192041	0.0248836	0.0383778	0.0123405	0.00475519	0.0108143	0.0271603	0.0194762	0.00422682	0.0393566	0.0130442	0.0312846	0.000214187	0.0134672	0.0358736	0.0572332	0.0217229	0.0112876	0.030644	0.0177513	0.0133454	0.0100885	0.00699874	0.0266365	0.0094765	0.0587266	0.0144443	0.0111081	0.0164042	0.0044044	0.0153295	0.0192535	0.0341673	0.0158383	0.0224206	0.0131027	0.0106276	0.0249916	0.0328177	0.0115422	0.0288606	0.0174283	0.0100336	0.0111887	0.017587	0.0219199	0.0215307	0.0254697	0.020809
0.00337068	0.0199077	0.0256162	0.0389509	0.0122226	0.00458957	0.0110167	0.0270864	0.0199309	0.00469058	0.0389878	0.0134858	0.0318816	6.35379e-06	0.013347	0.0368621	0.0579456	0.0219152	0.0109756	0.0306476	0.0176763	0.0131172	0.010036	0.006907	0.02584	0.00915211	0.0592887	0.0142378	0.0105906	0.0160972	0.00447695	0.016135	0.0186943	0.034404	0.0163019	0.0224254	0.0126424	0.010912	0.0247496	0.0325307	0.0112954	0.0285548	0.0167826	0.00975805	0.0109898	0.0177613	0.0218975	0.0214499	0.0250616	0.0207177
0.00356882	0.0206131	0.0263655	0.0395219	0.0121098	0.00443537	0.0112239	0.02702	0.0203659	0.00513852	0.0385979	0.0140106	0.0324449	0.00020184	0.0132622	0.037865	0.0586414	0.0220932	0.0106822	0.0306216	0.0175865	0.0128901	0.0099725	0.00685744	0.0250225	0.00882476	0.0598019	0.0140206	0.0100628	0.0157828	0.00455311	0.0169396	0.0181126	0.0346022	0.0167599	0.0224144	0.0121949	0.0112252	0.0244802	0.032219	0.0110367	0.0282375	0.016143	0.00949162	0.0108181	0.017938	0.0218608	0.0213559	0.0246405	0.0206056
0.0037567	0.0213259	0.0270723	0.0400877	0.011997	0.004294	0.0114304	0.0269472	0.0207716	0.00556521	0.0381811	0.0146137	0.0329668	0.000398369	0.0132066	0.0388736	0.0593212	0.0222559	0.0104049	0.0305704	0.0174838	0.0126609	0.00993236	0.00685351	0.0241851	0.00850113	0.0602833	0.0137885	0.00951212	0.01547	0.00463637	0.01774	0.0175199	0.0347602	0.017202	0.0223805	0.011749	0.0115741	0.0241892	0.0318697	0.0107764	0.027899	0.0155195	0.00921072	0.0106776	0.0181158	0.0218243	0.0212614	0.0242016	0.0204855
0.00393278	0.0220383	0.0277729	0.040647	0.0118878	0.00416149	0.0116381	0.0268732	0.0211478	0.0059837	0.03775	0.0152785	0.0334445	0.000579913	0.0131856	0.0398682	0.0599938	0.0223865	0.0101443	0.0304928	0.0173692	0.0124395	0.00989426	0.00689957	0.0233287	0.00816141	0.0607282	0.0135501	0.008955	0.0151556	0.00472299	0.0185349	0.0169088	0.0348888	0.0176253	0.0223256	0.0113161	0.0119574	0.0238762	0.0314894	0.01051	0.0275453	0.0149522	0.00891896	0.0105672	0.0182866	0.0217836	0.0211578	0.023748	0.0203466
0.0040836	0.0227513	0.0284756	0.0412014	0.0117862	0.00404122	0.0118417	0.026813	0.0215111	0.00638803	0.0373033	0.0159901	0.0338751	0.000747808	0.0131985	0.0408584	0.0606434	0.0225107	0.00990574	0.030385	0.0172464	0.0122256	0.00987307	0.00698599	0.0224597	0.00781802	0.0611415	0.0132994	0.00838062	0.0148367	0.00483219	0.0193035	0.0162988	0.0349681	0.0180414	0.0222481	0.0109184	0.0123574	0.0235395	0.0310915	0.0102367	0.0271747	0.0144151	0.00864146	0.0104942	0.0184592	0.0217315	0.0210386	0.0232839	0.0201981
0.00421761	0.0234615	0.0291807	0.0417453	0.0116931	0.00394227	0.0120506	0.0267559	0.0218514	0.00677267	0.036839	0.0167379	0.0342588	0.000908166	0.0132492	0.0418382	0.0612757	0.022637	0.00968792	0.0302552	0.0171146	0.0120259	0.00986791	0.00712794	0.0215792	0.00747114	0.0615069	0.0130293	0.00780422	0.0145276	0.00495049	0.02005	0.0156811	0.0350132	0.0184369	0.022144	0.010492	0.0127793	0.0231788	0.0306683	0.0099587	0.0267965	0.0138985	0.00837611	0.0104625	0.018627	0.0216728	0.0209201	0.0228073	0.0200432
0.00434467	0.0241741	0.0298819	0.0422507	0.0116145	0.00386411	0.0122524	0.0267079	0.0221721	0.00714365	0.036364	0.017528	0.034591	0.00105518	0.0133313	0.0428061	0.0618923	0.0227013	0.0094885	0.0300929	0.0169621	0.0118207	0.00987332	0.00730893	0.0206926	0.00712861	0.0618081	0.0127454	0.0072245	0.014212	0.00507458	0.0207825	0.0150751	0.0350203	0.0188159	0.022017	0.0100663	0.0132244	0.0227996	0.0302143	0.00967571	0.0264071	0.013425	0.00812075	0.0104468	0.0188005	0.0216038	0.020789	0.0223197	0.019875
0.00445654	0.0248836	0.0305685	0.0427485	0.0115488	0.0038162	0.0124462	0.0266601	0.0224594	0.00749649	0.0358725	0.0183614	0.034875	0.00118574	0.0134359	0.0437635	0.0624893	0.0227406	0.00930668	0.0299088	0.0168013	0.0116303	0.00988659	0.00752694	0.0198067	0.00677524	0.0620634	0.0124467	0.00664864	0.0138858	0.00521584	0.0215043	0.0144718	0.0349992	0.0191826	0.0218702	0.00968228	0.013683	0.0223952	0.0297316	0.00938916	0.0259999	0.012979	0.00787157	0.0104594	0.0189707	0.0215307	0.0206495	0.0218187	0.0196965
0.00455833	0.0256162	0.031255	0.0432443	0.0115048	0.00380713	0.0126367	0.0266367	0.0227163	0.00782802	0.0353716	0.0192199	0.0351169	0.00129999	0.0135697	0.0446983	0.0630725	0.0227628	0.00914473	0.029701	0.0166332	0.0114476	0.00990546	0.00778124	0.0189263	0.00642636	0.0622708	0.0121418	0.00609186	0.0135697	0.0053759	0.0222094	0.0138763	0.0349635	0.0195296	0.0216961	0.00931847	0.0141568	0.0219741	0.0292409	0.00909547	0.0255704	0.0125764	0.00762173	0.0104853	0.0191319	0.0214499	0.0204953	0.0213148	0.0195142
0.00464021	0.0263655	0.0319307	0.0437249	0.0114697	0.00382225	0.0128161	0.026605	0.0229525	0.0081326	0.0348529	0.0200855	0.0353002	0.00140173	0.0137325	0.0456282	0.0636357	0.0227706	0.00900526	0.0294745	0.0164524	0.0112752	0.00992809	0.00806361	0.0180479	0.0060569	0.0624353	0.0118278	0.00555669	0.0132486	0.00555137	0.0228955	0.0133115	0.0348885	0.0198583	0.0215054	0.00898843	0.0146404	0.0215446	0.0287314	0.0087991	0.0251289	0.0122209	0.00738338	0.0105135	0.0192926	0.0213559	0.0203315	0.0207987	0.0193093
0.00470606	0.0270723	0.0326083	0.0441973	0.0114572	0.00386198	0.0129834	0.0265794	0.0231563	0.00842554	0.0343296	0.0209588	0.0354241	0.00149378	0.013923	0.0465567	0.0641899	0.0227606	0.00888312	0.0292253	0.0162626	0.011107	0.00996382	0.00837428	0.0171794	0.00567858	0.0625455	0.0115039	0.00507198	0.0129348	0.0057195	0.0235673	0.0127721	0.0347647	0.0201697	0.0212909	0.00868019	0.0151395	0.0211048	0.0281861	0.00850092	0.0246656	0.0119056	0.00716588	0.0105505	0.0194483	0.0212614	0.0201624	0.0202767	0.0190854
0.00476056	0.0277729	0.0332851	0.0446567	0.0114695	0.00393475	0.0131363	0.0265863	0.0233375	0.00869865	0.0337977	0.021837	0.0354966	0.00156813	0.0141362	0.0474804	0.064729	0.0227298	0.00877888	0.0289488	0.0160725	0.0109431	0.0100184	0.0087096	0.016328	0.00532859	0.0626107	0.0111662	0.00464377	0.0126162	0.0058955	0.0242147	0.012278	0.034621	0.0204586	0.0210474	0.0083926	0.0156395	0.0206468	0.027616	0.00820238	0.0241941	0.0116278	0.00695797	0.0106092	0.0195954	0.0211578	0.0199858	0.0197547	0.0188778
0.00479933	0.0284756	0.0339548	0.0451065	0.011508	0.00403561	0.0132755	0.0266118	0.0234837	0.00895572	0.0332637	0.0227153	0.035518	0.00163115	0.0143774	0.0483849	0.0652525	0.0226936	0.00869196	0.0286617	0.0158692	0.0107924	0.0100785	0.009063	0.0155028	0.00497628	0.0626345	0.010818	0.00431764	0.0123004	0.00607618	0.0248447	0.0118348	0.0344494	0.0207397	0.0207805	0.00812963	0.0161445	0.0201856	0.0270321	0.00789952	0.0237148	0.0114022	0.00676466	0.0107017	0.0197476	0.0210386	0.0197983	0.0192333	0.0186704
0.00481974	0.0291807	0.0346156	0.0455484	0.011574	0.00416251	0.0134023	0.0266531	0.0236061	0.00919279	0.0327202	0.0235839	0.0354843	0.00165578	0.0146338	0.0492681	0.0657553	0.0226426	0.00862299	0.0283515	0.015654	0.0106514	0.0101552	0.00943088	0.0147135	0.00462428	0.062614	0.0104552	0.0041174	0.0119873	0.00626923	0.02546	0.0114585	0.0342433	0.0209908	0.0204805	0.00789347	0.0166556	0.0197035	0.0264357	0.00759834	0.0232116	0.0112269	0.00660527	0.0108061	0.0198993	0.0209201	0.0195985	0.0187183	0.0184543
0.00482593	0.0298819	0.0352627	0.0459685	0.0116694	0.00432559	0.0135115	0.0266982	0.0236965	0.00940936	0.0321828	0.0244523	0.0353978	0.0016636	0.0149014	0.0501336	0.0662314	0.0225862	0.00856189	0.0280201	0.0154325	0.0105269	0.0102391	0.00981309	0.013966	0.00428321	0.0625501	0.0100979	0.00406708	0.0116669	0.00646482	0.0260543	0.0111636	0.0340119	0.0212281	0.0201647	0.00768347	0.0171617	0.0192028	0.0258197	0.00729909	0.0227044	0.0111078	0.00647658	0.010917	0.0200465	0.020789	0.0193898	0.0182032	0.0182316
0.00481631	0.0305685	0.0359022	0.0463696	0.0117886	0.00450937	0.0136021	0.0267508	0.0237585	0.00961287	0.0316406	0.0253016	0.0352712	0.00167956	0.0151733	0.050983	0.0666892	0.0225	0.00850893	0.0276537	0.0152016	0.0104087	0.0103439	0.0101957	0.0132716	0.00395126	0.0624376	0.0097447	0.00418226	0.0113406	0.00665569	0.0266253	0.0109476	0.0337488	0.0214414	0.0198206	0.00749744	0.0176703	0.0187288	0.0251899	0.0069967	0.0221941	0.0110314	0.00637691	0.0110257	0.0201908	0.0206495	0.0191673	0.0177027	0.0180016
0.00478766	0.031255	0.0365401	0.046755	0.011932	0.00471046	0.0136839	0.0268079	0.0237998	0.00979442	0.0311049	0.0261331	0.0350813	0.00167692	0.0154587	0.0518129	0.0671312	0.022385	0.00846782	0.02727	0.0149765	0.0103074	0.0104558	0.0105882	0.0126372	0.00362354	0.0622802	0.00938243	0.00446552	0.0110144	0.00684993	0.0271825	0.010838	0.0334602	0.0216358	0.0194546	0.00733498	0.0181954	0.0182652	0.0245476	0.00670418	0.0216838	0.0109939	0.00631364	0.0111394	0.0203282	0.0204953	0.0189297	0.0172111	0.0177623
0.00474317	0.0319307	0.0371726	0.0471256	0.0121091	0.00491276	0.0137407	0.0268834	0.0238041	0.00995849	0.0305633	0.0269482	0.0348159	0.00165052	0.0157462	0.0526217	0.0675856	0.0222597	0.00843524	0.0268649	0.0147418	0.0102179	0.0105774	0.0109855	0.012076	0.0033196	0.0620743	0.00900308	0.00488233	0.0106903	0.00704871	0.0277154	0.0108343	0.0331452	0.0218067	0.0190649	0.00720086	0.0187127	0.0178059	0.0238986	0.00641867	0.0211848	0.0110012	0.00628179	0.0112523	0.0204662	0.0203315	0.0186877	0.0167362	0.0175211
0.00468337	0.0326083	0.0377905	0.0474799	0.0123117	0.00515915	0.0137796	0.0269661	0.0237766	0.010103	0.0300117	0.0277455	0.0344889	0.0016075	0.0160391	0.0534267	0.0680195	0.0221354	0.00840853	0.0264535	0.0145095	0.0101394	0.0107102	0.0113896	0.0115967	0.00302494	0.0618221	0.00861369	0.00540477	0.0103585	0.00725133	0.0282274	0.0109395	0.0328045	0.0219629	0.0186517	0.0070905	0.0192016	0.0173533	0.0232455	0.00614088	0.0206899	0.0110524	0.00629097	0.0113642	0.020599	0.0201624	0.0184461	0.0162775	0.0172824
0.00460364	0.0332851	0.0383778	0.0478197	0.0125352	0.00541704	0.0137991	0.0270495	0.0237218	0.0102296	0.0294831	0.0285173	0.0341171	0.00153901	0.0163337	0.0542281	0.0684249	0.0219985	0.00838001	0.0260466	0.0142758	0.0100885	0.0108555	0.0117918	0.0112035	0.00275178	0.0615263	0.0082237	0.00601365	0.0100341	0.00744492	0.0287151	0.0111548	0.0324427	0.0220949	0.0182209	0.00700017	0.0196886	0.0169085	0.0225854	0.00587903	0.0201989	0.0111425	0.00635088	0.0114715	0.0207237	0.0199858	0.018196	0.0158332	0.0170403
0.00450754	0.0339548	0.0389509	0.0481478	0.0127889	0.00568528	0.0138074	0.0271483	0.0236367	0.0103404	0.0289654	0.0292604	0.0336892	0.00145024	0.0166201	0.0550137	0.0688024	0.0218457	0.00834696	0.0256176	0.0140408	0.010036	0.01102	0.0121781	0.0109114	0.00250962	0.0612055	0.00782364	0.00668026	0.00970471	0.00764359	0.0291849	0.0114783	0.0320607	0.0222195	0.0177714	0.00692999	0.0201644	0.0164701	0.0219244	0.00563686	0.0197016	0.0112611	0.00645835	0.0115659	0.0208366	0.0197983	0.0179609	0.0154082	0.0168065
0.00439613	0.0346156	0.0395219	0.0484553	0.0130707	0.00595986	0.013797	0.0272539	0.0235208	0.0104339	0.0284539	0.029966	0.0332092	0.00134678	0.016903	0.0557722	0.0691768	0.0216758	0.00831748	0.0251878	0.0138066	0.0099725	0.0111976	0.0125611	0.0107555	0.00232019	0.0608336	0.00742726	0.00740128	0.00937299	0.00783903	0.0296335	0.0119005	0.0316547	0.0223423	0.0173054	0.00687752	0.0206385	0.0160511	0.0212664	0.0054132	0.019226	0.0114005	0.00661706	0.0116584	0.0209486	0.0195985	0.0177023	0.0150188	0.016562
0.00427029	0.0352627	0.0400877	0.0487396	0.0133893	0.00622075	0.0137588	0.0273686	0.0233754	0.010504	0.0279511	0.0306392	0.0326866	0.00123048	0.0171691	0.0565122	0.0695774	0.0214943	0.00828953	0.0247354	0.0135759	0.00993236	0.0113903	0.0129461	0.0107201	0.00217952	0.0604024	0.00703307	0.00815087	0.00904672	0.00803329	0.030049	0.0124059	0.0312292	0.022398	0.016794	0.00684124	0.0210941	0.0156544	0.0206151	0.00521895	0.0187721	0.0115685	0.00681739	0.0117418	0.0210561	0.0193898	0.0174268	0.0146561	0.0163298
0.00412515	0.0359022	0.040647	0.0490012	0.0137335	0.00649453	0.0136987	0.0274938	0.0231922	0.0105562	0.027465	0.0312846	0.0321058	0.00110693	0.0174249	0.0572332	0.0699637	0.0213016	0.0082548	0.0242621	0.0133454	0.00989426	0.0116028	0.0133213	0.0108	0.0021063	0.0599415	0.00664338	0.00892574	0.00871942	0.00821373	0.0304356	0.0130036	0.0307824	0.0224206	0.0162626	0.00681477	0.0215315	0.0152865	0.0199709	0.00505739	0.0183316	0.0117591	0.00706506	0.011801	0.0211508	0.0191673	0.0171464	0.0143257	0.0161165
0.00396605	0.0365401	0.0412014	0.049258	0.0140942	0.00676517	0.0136137	0.0276216	0.0229762	0.0106023	0.0269792	0.0318816	0.0314686	0.000982154	0.0176741	0.0579456	0.0703259	0.0211031	0.00821619	0.0237806	0.0131172	0.00987307	0.0118084	0.0136776	0.0109916	0.00209879	0.0594438	0.00625254	0.00972482	0.00838604	0.00838297	0.0308144	0.013668	0.0303255	0.0224254	0.0157294	0.00680598	0.0219579	0.0149456	0.0193484	0.00492634	0.017917	0.0119616	0.00735309	0.0118503	0.0212398	0.0189297	0.0168571	0.0140329	0.0159153
0.00379703	0.0371726	0.0417453	0.0495043	0.0144766	0.00704615	0.0135104	0.0277533	0.0227364	0.0106315	0.0265109	0.0324449	0.0307768	0.000859915	0.0179024	0.0586414	0.0706535	0.020896	0.00816902	0.0232854	0.0128901	0.00986791	0.0120028	0.0140278	0.0112849	0.00216071	0.0589047	0.00587377	0.0105348	0.00805627	0.00855091	0.0311896	0.0143998	0.0298429	0.0224144	0.0151683	0.00680765	0.0223657	0.0146478	0.0187185	0.00484806	0.0175534	0.0121806	0.00768736	0.0118896	0.0213248	0.0186877	0.0165658	0.0137806	0.0157069
0.00360866	0.0377905	0.0422507	0.0497326	0.0148723	0.00731718	0.0133926	0.0278978	0.0224606	0.0106379	0.0260503	0.0329668	0.0300426	0.000759805	0.0181108	0.0593212	0.070959	0.0206848	0.00811331	0.022785	0.0126609	0.00987332	0.0122597	0.0143652	0.0116599	0.00228709	0.0583247	0.00549532	0.0113563	0.007729	0.00871399	0.031523	0.0151778	0.0293403	0.0223805	0.0146068	0.0068159	0.0227578	0.0143951	0.0180915	0.00480783	0.0172518	0.0124064	0.0080687	0.0119364	0.0214038	0.0184461	0.0162688	0.0135769	0.0154884
0.00341398	0.0383778	0.0427485	0.0499458	0.0152844	0.00758241	0.013257	0.0280492	0.0221505	0.0106337	0.0256111	0.0334445	0.0292602	0.000712041	0.0183232	0.0599938	0.0712519	0.0204644	0.00805204	0.0222749	0.0124395	0.00988659	0.0125486	0.0146795	0.0121128	0.00246648	0.0577098	0.00512712	0.01218	0.00740171	0.00887503	0.03183	0.0159975	0.02882	0.0223256	0.0140248	0.00682651	0.0231379	0.0141886	0.0174874	0.00481636	0.0169944	0.0126369	0.00848706	0.0119864	0.021475	0.018196	0.0159733	0.0134192	0.0152988
0.00321282	0.0389509	0.0432443	0.0501395	0.0157213	0.00784465	0.0130994	0.0281993	0.0218141	0.0106194	0.0251827	0.0338751	0.0284168	0.000740883	0.018536	0.0606434	0.0715265	0.0202436	0.00798612	0.0217646	0.0122256	0.00990546	0.0128491	0.0149824	0.012626	0.00268146	0.05707	0.00478768	0.0130092	0.00707662	0.00903502	0.0321127	0.016853	0.0282947	0.0222481	0.0134188	0.00684532	0.023495	0.0140332	0.0168959	0.00486957	0.0167905	0.0128752	0.00893717	0.0120103	0.0215487	0.0179609	0.0156724	0.0133124	0.0151312
0.00300548	0.0395219	0.0437249	0.0503155	0.0161639	0.00808765	0.0129219	0.0283514	0.0214492	0.0105934	0.0247728	0.0342588	0.0275169	0.000858412	0.0187192	0.0612757	0.0717781	0.0200334	0.00790637	0.0212426	0.0120259	0.00992809	0.013172	0.0152678	0.0131975	0.00292164	0.0564044	0.00446771	0.0138354	0.00674959	0.00918083	0.0323834	0.0177309	0.0277564	0.022144	0.0127998	0.00686327	0.0238246	0.0139258	0.0163301	0.00497187	0.0166581	0.013111	0.00944964	0.0120111	0.021618	0.0177023	0.0153694	0.0132414	0.0149747
0.00280989	0.0400877	0.0441973	0.0504733	0.0166166	0.0083328	0.0127195	0.0285042	0.0210464	0.0105573	0.0243838	0.034591	0.0265898	0.00104141	0.0188634	0.0618923	0.072019	0.0197911	0.00781118	0.0207256	0.0118207	0.00996382	0.0135025	0.0155443	0.0138115	0.00318216	0.0557061	0.00418037	0.0146527	0.00642477	0.00931907	0.0326224	0.0186408	0.0272145	0.022017	0.01217	0.00685761	0.0241419	0.0138696	0.0157836	0.00512281	0.0166045	0.0133427	0.0100017	0.0119971	0.0216766	0.0174268	0.015061	0.0132146	0.0148279
0.00262806	0.040647	0.0446567	0.0506124	0.0170798	0.00857392	0.0124939	0.028657	0.0205958	0.010514	0.0240111	0.034875	0.0256175	0.00127971	0.0189822	0.0624893	0.0722478	0.0195346	0.00771019	0.020207	0.0116303	0.0100184	0.013854	0.0158065	0.0144564	0.0034614	0.05499	0.00391845	0.0154672	0.00610482	0.0094498	0.032835	0.0195652	0.0266714	0.0218702	0.0115314	0.00685937	0.0244366	0.0138657	0.0152637	0.00531629	0.01662	0.0135756	0.0105824	0.0119801	0.0217305	0.0171464	0.0147579	0.0132355	0.0147047
0.00247011	0.0412014	0.0451065	0.0507335	0.0175609	0.00879851	0.0122449	0.028799	0.0201274	0.010464	0.0236604	0.0351169	0.0246049	0.00154772	0.0190826	0.0630725	0.0724627	0.0192879	0.00759624	0.0196824	0.0114476	0.0100785	0.0142188	0.0160453	0.0151279	0.00375043	0.0542667	0.00370266	0.0162744	0.00578564	0.00958731	0.0330274	0.0205067	0.02614	0.0216961	0.0108834	0.00686664	0.0247126	0.0139164	0.0147673	0.00554344	0.0167267	0.013803	0.0112001	0.0119249	0.0217784	0.0168571	0.0144514	0.0133057	0.0146016
0.00234781	0.0417453	0.0455484	0.0508344	0.0180528	0.00901394	0.0119758	0.0289244	0.0196425	0.0104023	0.0233264	0.0353002	0.0235533	0.00184428	0.0191595	0.0636357	0.072672	0.0190431	0.00745811	0.0191574	0.0112752	0.0101552	0.0146006	0.0162648	0.0158168	0.00404581	0.0534941	0.00353542	0.0170743	0.00546744	0.00974506	0.033196	0.0214517	0.0255892	0.0215054	0.0102286	0.00687456	0.0249645	0.0140169	0.0142987	0.00580665	0.0168991	0.0140279	0.01184	0.0118573	0.021822	0.0165658	0.0141483	0.0134137	0.0145162
0.0022697	0.0422507	0.0459685	0.0509152	0.0185452	0.00922381	0.0116977	0.0290473	0.0191352	0.0103337	0.0230099	0.0354241	0.0224606	0.00216103	0.0192032	0.0641899	0.072873	0.0187935	0.0073204	0.018629	0.011107	0.0102391	0.015001	0.0164694	0.0165051	0.00434583	0.0527069	0.00342514	0.0178706	0.00515523	0.00985965	0.033354	0.0224029	0.02499	0.0212909	0.00955991	0.00687994	0.0251859	0.0141648	0.0138627	0.00610003	0.0171576	0.0142428	0.0125175	0.0118049	0.0218602	0.0162688	0.0138496	0.0135589	0.0144555
0.00225663	0.0427485	0.0463696	0.0509765	0.0190523	0.00941448	0.0113946	0.0291717	0.0186005	0.0102509	0.0227124	0.0354966	0.0213261	0.0024942	0.0192217	0.064729	0.0730654	0.0185464	0.00717985	0.0181072	0.0109431	0.0103439	0.0154181	0.0166545	0.0171911	0.00465435	0.0519141	0.00337689	0.0186518	0.00484386	0.00995634	0.0334582	0.0233575	0.024409	0.0210474	0.00889604	0.00686707	0.0253862	0.0143549	0.0134582	0.0064151	0.0174931	0.0144575	0.0132142	0.0117614	0.021889	0.0159733	0.0135506	0.0137417	0.0144157
0.00231176	0.0432443	0.046755	0.0510268	0.0195589	0.00959586	0.0110538	0.0292877	0.018036	0.0101705	0.0224472	0.035518	0.0201495	0.00284372	0.0192123	0.0652525	0.0732361	0.0183206	0.00702976	0.0175896	0.0107924	0.0104558	0.0158456	0.0168166	0.0178796	0.00496189	0.051101	0.00338844	0.0194249	0.004543	0.0100457	0.0335387	0.0243134	0.023831	0.0207805	0.00822961	0.00685313	0.0255636	0.0145806	0.0130755	0.00675643	0.0179159	0.0146554	0.0139505	0.0116913	0.0219111	0.0156724	0.0132649	0.0139521	0.0143988
0.00244611	0.0437249	0.0471256	0.0510349	0.020069	0.00976956	0.0106954	0.0293944	0.0174383	0.0100985	0.0221948	0.0354843	0.0189422	0.00320962	0.0191772	0.0657553	0.0734016	0.0180926	0.00687417	0.0170738	0.0106514	0.0105774	0.0162955	0.0169604	0.0185629	0.0052648	0.0502891	0.00346656	0.0201761	0.00424771	0.0101169	0.0336074	0.0252606	0.0232552	0.0204805	0.00756323	0.00682775	0.0257051	0.0148572	0.0127241	0.00711619	0.018416	0.0148377	0.014702	0.0116014	0.0219275	0.0153694	0.0129848	0.0141874	0.0143938
0.00265588	0.0441973	0.0474799	0.0510094	0.0205779	0.00992837	0.0103187	0.0294805	0.0168115	0.0100188	0.0219635	0.0353978	0.0177061	0.00359025	0.0191214	0.0662314	0.0735465	0.0178461	0.00671727	0.016567	0.0105269	0.0107102	0.0167571	0.0170839	0.0192412	0.00557226	0.0494541	0.00360147	0.0209054	0.00395289	0.0101805	0.0336546	0.0261948	0.0226797	0.0201647	0.00690223	0.00679936	0.0258297	0.0151663	0.0124151	0.0074894	0.0189796	0.0150089	0.0154866	0.0115129	0.0219445	0.015061	0.012705	0.0144441	0.0143973
0.00293013	0.0446567	0.0478197	0.0509752	0.0210799	0.0100689	0.00993333	0.0295486	0.0161536	0.0099475	0.0217441	0.0352712	0.0164421	0.00398097	0.0190329	0.0666892	0.0736555	0.0175928	0.00656408	0.016064	0.0104087	0.0108555	0.0172277	0.0171841	0.0199047	0.00587759	0.048592	0.00377566	0.0216105	0.00366237	0.0102434	0.0336732	0.0271132	0.0221163	0.0198206	0.00625647	0.0067544	0.0259313	0.0154912	0.0121363	0.0078799	0.0195987	0.0151689	0.0163087	0.0114169	0.0219522	0.0147579	0.0124398	0.0147239	0.0144276
0.00325815	0.0451065	0.0481478	0.0509239	0.0215864	0.010197	0.00953511	0.0296139	0.0154671	0.00988089	0.0215458	0.0350813	0.0151489	0.00437956	0.0189133	0.0671312	0.0737798	0.0173458	0.00641068	0.015566	0.0103074	0.01102	0.0177125	0.0172587	0.0205449	0.00618762	0.0477184	0.00399044	0.0223174	0.00338132	0.0102986	0.0336664	0.028041	0.0215562	0.0194546	0.00562306	0.00669171	0.0260384	0.0158582	0.0118889	0.00827961	0.0202755	0.0153243	0.0171527	0.0113118	0.021955	0.0144514	0.0121824	0.0150258	0.0144812
0.00362295	0.0455484	0.0484553	0.0508551	0.0220943	0.0103119	0.00912699	0.0296677	0.0147581	0.00982255	0.0213619	0.0348159	0.0138282	0.00478826	0.0187657	0.0675856	0.0739472	0.0171055	0.0062715	0.0150736	0.0102179	0.0111976	0.0182123	0.0173171	0.0211673	0.00649791	0.0468437	0.00423479	0.023021	0.00311883	0.0103385	0.0336374	0.028974	0.021004	0.0190649	0.00501219	0.00662365	0.0260972	0.0162431	0.0116725	0.00868657	0.0209997	0.0154645	0.0180295	0.0111821	0.0219527	0.0141483	0.0119329	0.0153334	0.0145569
0.00403443	0.0459685	0.0487396	0.0507661	0.022596	0.0104057	0.0087077	0.0297235	0.0140215	0.00977655	0.0211889	0.0344889	0.0124823	0.00520331	0.0185914	0.0680195	0.074085	0.0168688	0.00614177	0.0145876	0.0101394	0.0113903	0.0187268	0.0173571	0.021762	0.00680582	0.0459514	0.0045107	0.0236876	0.00286884	0.0103806	0.033592	0.029871	0.0204632	0.0186517	0.00443866	0.00653851	0.0260806	0.016652	0.011484	0.0091021	0.0217717	0.0155968	0.0189167	0.0110505	0.0219367	0.0138496	0.0117002	0.0156389	0.0146507
0.00447588	0.0463696	0.0490012	0.0506627	0.0230936	0.0104857	0.00827844	0.0297604	0.0132687	0.00973629	0.0210255	0.0341171	0.0111255	0.00562221	0.0183902	0.0684249	0.0741938	0.0166355	0.00603323	0.0141123	0.0100885	0.0116028	0.0192512	0.01738	0.0223157	0.00711344	0.0450501	0.00481053	0.0243314	0.00263234	0.0104124	0.0335259	0.0307505	0.0199302	0.0182209	0.00391334	0.00644381	0.0260557	0.017065	0.0113261	0.00951351	0.0225825	0.0157101	0.0198336	0.0109263	0.0219199	0.0135506	0.0114794	0.0159469	0.0147643
0.00495125	0.046755	0.049258	0.0505342	0.0235826	0.0105502	0.00785303	0.0297748	0.0125007	0.00970854	0.0208754	0.0336892	0.00974798	0.00604203	0.0181602	0.0688024	0.0742968	0.0164028	0.0059416	0.0136556	0.010036	0.0118084	0.0197864	0.0173851	0.0228522	0.00741678	0.0441334	0.005119	0.0249601	0.00240455	0.0104318	0.0334464	0.031612	0.0194153	0.0177714	0.00346119	0.00633185	0.0260073	0.0174799	0.0111981	0.00993185	0.0234208	0.0158107	0.0207713	0.0108016	0.0218975	0.0132649	0.0112933	0.0162521	0.0148935
0.0054517	0.0471256	0.0495043	0.0503837	0.0240707	0.0105975	0.00744311	0.0297726	0.0117042	0.00968723	0.0207381	0.0332092	0.0083616	0.00646283	0.0179017	0.0691768	0.0743847	0.0161803	0.00587144	0.0132069	0.0099725	0.0120028	0.0203304	0.0173648	0.0233876	0.00771972	0.0432055	0.00542745	0.0255573	0.00218405	0.0104392	0.0333383	0.0324631	0.0189111	0.0173054	0.00310875	0.00620767	0.0259401	0.0179034	0.0110842	0.010349	0.0242862	0.0159064	0.0217281	0.0106697	0.0218608	0.0129848	0.0111018	0.0165529	0.0150429
0.00595679	0.0474799	0.0497326	0.0502103	0.0245502	0.0106413	0.00703007	0.0297452	0.0108694	0.0096911	0.0206138	0.0326866	0.00697118	0.00689263	0.0176228	0.0695774	0.0744725	0.0159638	0.00583877	0.0127585	0.00993236	0.0122597	0.0208804	0.0173219	0.023886	0.0080216	0.0422754	0.00573326	0.0261307	0.00198327	0.0104442	0.0332184	0.033284	0.0184194	0.016794	0.00289736	0.00606931	0.0258525	0.018324	0.0109963	0.0107747	0.0251767	0.0159715	0.0227088	0.0105335	0.0218243	0.012705	0.0108881	0.0168475	0.0152085
0.00647645	0.0478197	0.0499458	0.0500172	0.0250221	0.0106923	0.00661407	0.0297028	0.0100225	0.0097345	0.0204957	0.0321058	0.00560055	0.00732342	0.0173182	0.0699637	0.074552	0.01576	0.00585193	0.0123275	0.00989426	0.0125486	0.0214385	0.0172607	0.0243437	0.00831386	0.041351	0.00604574	0.0266828	0.00180011	0.0104395	0.0330741	0.0340873	0.0179438	0.0162626	0.002853	0.0059108	0.0257406	0.0187389	0.0109315	0.0111954	0.0260801	0.0160225	0.0236962	0.0103863	0.0217836	0.0124398	0.0107072	0.0171307	0.0153794
0.0070112	0.0481478	0.0501395	0.0498044	0.0254827	0.0107094	0.00622685	0.0296481	0.00916691	0.00979026	0.0203813	0.0314686	0.00427327	0.00775181	0.0169805	0.0703259	0.0746318	0.0155629	0.00590948	0.0119068	0.00987307	0.0128491	0.0219977	0.0171839	0.0247747	0.00860891	0.0404173	0.00637722	0.0272018	0.00164112	0.0104276	0.032918	0.0348654	0.0174815	0.0157294	0.00297	0.00573907	0.0255924	0.0191526	0.010903	0.011614	0.0270083	0.0160756	0.0247006	0.0102303	0.0217315	0.0121824	0.0105469	0.0173995	0.0155626
0.00756101	0.0484553	0.0503155	0.0495705	0.0259299	0.0106857	0.00587222	0.0295783	0.00830436	0.00985423	0.02027	0.0307768	0.00308903	0.00818236	0.0166187	0.0706535	0.0746837	0.0153786	0.00601074	0.0115012	0.00986791	0.013172	0.0225583	0.0170947	0.0251628	0.00889872	0.0394785	0.00672976	0.0276957	0.00150967	0.010401	0.0327504	0.0356174	0.0170397	0.0151683	0.00322995	0.00556064	0.0254244	0.0195536	0.0108938	0.0120338	0.0279767	0.0161149	0.0257196	0.0100703	0.0216728	0.0119329	0.0104103	0.0176552	0.0157525
0.00812936	0.0487396	0.0504733	0.0493157	0.0263617	0.0106416	0.0055586	0.0294797	0.00742683	0.00993709	0.0201631	0.0300426	0.00230018	0.00860977	0.0162376	0.070959	0.0747184	0.0151999	0.0061659	0.011113	0.00987332	0.0135025	0.0231492	0.0169809	0.0255259	0.00918464	0.0385402	0.00705823	0.0281657	0.00140444	0.0103647	0.0325163	0.0363407	0.0166518	0.0146068	0.00359861	0.00536455	0.0252239	0.0199486	0.010851	0.0124535	0.0289192	0.0161371	0.0267469	0.00991569	0.0216038	0.0117002	0.0102916	0.0178939	0.0159476
0.00870634	0.0490012	0.0506124	0.0490399	0.0267866	0.010585	0.00527779	0.0293691	0.00653524	0.0100402	0.0200546	0.0292602	0.00237551	0.00903633	0.0158406	0.0712519	0.0747627	0.0150261	0.00637634	0.0107335	0.00988659	0.013854	0.0237416	0.0168503	0.0258583	0.00946089	0.0375889	0.00738814	0.02861	0.00133788	0.0103196	0.0322869	0.0370304	0.0162853	0.0140248	0.00403322	0.00515809	0.0249916	0.0203357	0.0108057	0.0128716	0.0298317	0.0161478	0.0277933	0.00975858	0.0215307	0.0114794	0.0101849	0.0181167	0.016148
0.00930576	0.049258	0.0507335	0.0487397	0.0271983	0.0105196	0.00506165	0.0292405	0.00563826	0.0101561	0.0199462	0.0284168	0.00329084	0.00946034	0.015436	0.0715265	0.0748107	0.0148575	0.00663193	0.0103671	0.00990546	0.0142188	0.0243191	0.0166972	0.0261525	0.00972894	0.0366287	0.00770524	0.0290223	0.00130912	0.0102612	0.032031	0.0377041	0.0159253	0.0134188	0.00452017	0.00493646	0.0247496	0.0207012	0.0107746	0.013285	0.0307256	0.0161385	0.0288508	0.00958973	0.0214499	0.0112933	0.0100973	0.0183175	0.0163454
0.00992567	0.0495043	0.0508344	0.0484257	0.0275982	0.0104471	0.00492618	0.0290892	0.00474238	0.0102928	0.0198383	0.0275169	0.00455819	0.00988088	0.0149824	0.0717781	0.0748445	0.0146908	0.0069403	0.0100203	0.00992809	0.0146006	0.0248915	0.0165291	0.0264131	0.00998952	0.0356611	0.00801937	0.029409	0.00131305	0.0101966	0.0317519	0.0383424	0.0155805	0.0127998	0.00503356	0.00469861	0.0244802	0.0210527	0.0107563	0.0136911	0.0316159	0.016115	0.0299105	0.00942375	0.0213559	0.0111018	0.0100311	0.0184962	0.0165608
0.0105405	0.0497326	0.0509152	0.048095	0.0279818	0.0103725	0.00487701	0.0289062	0.00385966	0.0104485	0.0197222	0.0265898	0.00594758	0.0102923	0.0144884	0.072019	0.0748807	0.0145377	0.00728419	0.00968352	0.00996382	0.015001	0.0254612	0.0163358	0.0266387	0.0102426	0.0347042	0.00833269	0.0297645	0.0013475	0.0101206	0.0314579	0.0389517	0.0152547	0.01217	0.00556389	0.00445158	0.0241892	0.0213846	0.0107441	0.0140942	0.0325051	0.0160802	0.030977	0.00925214	0.0212614	0.0108881	0.00998753	0.0186478	0.0167741
0.0111709	0.0499458	0.0509765	0.0477395	0.0283454	0.0102921	0.00491867	0.0287041	0.0030146	0.0106201	0.0196106	0.0256175	0.0074202	0.0106937	0.0140053	0.0722478	0.0749134	0.014393	0.00767615	0.00936163	0.0100184	0.0154181	0.0260363	0.0161234	0.0268268	0.0104858	0.0337431	0.00863346	0.0300966	0.00140868	0.0100327	0.0311497	0.0395232	0.0149532	0.0115314	0.00610584	0.00418453	0.0238762	0.0216969	0.0107271	0.0144973	0.0333915	0.0160314	0.0320498	0.00907516	0.0211578	0.0107072	0.00994436	0.0187604	0.0169841
0.0118022	0.0501395	0.0510268	0.0473678	0.0286964	0.0102025	0.00503869	0.0284921	0.00226554	0.0108105	0.0194917	0.0246049	0.00892285	0.0110876	0.0135201	0.0724627	0.0749273	0.0142587	0.00809674	0.00905396	0.0100785	0.0158456	0.0266076	0.0159099	0.0269804	0.0107186	0.0327922	0.00894086	0.0303972	0.00149093	0.00994335	0.0308195	0.0400557	0.01469	0.0108834	0.00664371	0.0039086	0.0235395	0.021985	0.0107059	0.0148907	0.0342652	0.015973	0.0331308	0.00890062	0.0210386	0.0105469	0.00992574	0.0188498	0.0172017
0.0124424	0.0503155	0.0510349	0.0469817	0.0290261	0.0101095	0.00524038	0.0282601	0.00177365	0.011016	0.0193634	0.0235533	0.0104518	0.0114763	0.0130309	0.072672	0.0749331	0.0141239	0.00858036	0.00875764	0.0101552	0.0162955	0.0271643	0.0156821	0.0270991	0.0109459	0.0317903	0.00923997	0.0306668	0.0015881	0.009861	0.030468	0.0405563	0.0144559	0.0102286	0.00718272	0.00361904	0.0231788	0.0222462	0.0106815	0.0152778	0.035122	0.0158992	0.034215	0.00870744	0.0209201	0.0104103	0.00992535	0.0189199	0.017404
0.0130953	0.0504733	0.0510094	0.0465912	0.0293357	0.01002	0.00551805	0.0280112	0.0017755	0.0112451	0.0192199	0.0224606	0.0119889	0.0118569	0.0125365	0.072873	0.0749191	0.0139994	0.00911749	0.00846985	0.0102391	0.0167571	0.0277286	0.015445	0.0271851	0.0111595	0.0307709	0.00953322	0.0308988	0.00169581	0.00974555	0.030109	0.0410286	0.0142287	0.00955991	0.00771794	0.00331655	0.0227996	0.0224802	0.0106552	0.0156552	0.0359582	0.0158192	0.0353017	0.00850003	0.020789	0.0102916	0.00993786	0.0189576	0.0176001
0.0137516	0.0506124	0.0509752	0.0461807	0.0296192	0.00992979	0.005856	0.0277402	0.00228103	0.0114834	0.0190686	0.0213261	0.0135313	0.0122297	0.0120485	0.0730654	0.0748913	0.0138845	0.00966206	0.00819222	0.0103439	0.0172277	0.0282862	0.015199	0.0272369	0.0113633	0.0297795	0.00981865	0.0311011	0.00181374	0.00961369	0.029736	0.0414612	0.0140232	0.00889604	0.00824461	0.00300712	0.0223952	0.0226922	0.0106143	0.0160213	0.0367741	0.0157279	0.0363911	0.0082861	0.0206495	0.0101849	0.00996963	0.0189615	0.0177939
0.014414	0.0507335	0.0509239	0.0457412	0.0298834	0.00983242	0.00624539	0.0274433	0.00305209	0.0117292	0.0189078	0.0201495	0.0150746	0.0125952	0.011568	0.0732361	0.0748529	0.0137745	0.0102283	0.00792924	0.0104558	0.0177125	0.028841	0.0149404	0.0272512	0.0115485	0.0287816	0.010098	0.0312798	0.00193155	0.0094755	0.0293526	0.0418574	0.0138483	0.00822961	0.00875064	0.00267397	0.0219741	0.022876	0.0105668	0.0163835	0.037556	0.0156247	0.0374744	0.00807653	0.0204953	0.0100973	0.0100086	0.0189341	0.0179834
0.0150821	0.0508344	0.0508551	0.0453012	0.0301189	0.00973156	0.00667744	0.027133	0.00394582	0.0119921	0.0187316	0.0189422	0.0166173	0.0129421	0.0110994	0.0734016	0.0748109	0.0136662	0.0108079	0.00767602	0.0105774	0.0182123	0.0293814	0.0146653	0.027225	0.0117264	0.0277933	0.010362	0.0314267	0.00205115	0.00932865	0.0289587	0.042217	0.0137106	0.00756323	0.00925418	0.00232849	0.0215446	0.0230353	0.0105142	0.0167375	0.038312	0.0155117	0.0385562	0.00787607	0.0203315	0.0100311	0.01006	0.0188743	0.0181684
0.0157542	0.0509152	0.0507661	0.0448439	0.0303378	0.00965397	0.0071369	0.0268039	0.00489448	0.0122636	0.0185436	0.0177061	0.0181577	0.0132787	0.0106565	0.0735465	0.0747714	0.0135719	0.0114123	0.00743593	0.0107102	0.0187268	0.029909	0.0143899	0.0271686	0.0118877	0.0268029	0.0106222	0.0315548	0.00217981	0.00918061	0.0285588	0.0425458	0.0135955	0.00690223	0.00974272	0.00197487	0.0211048	0.0231608	0.0104528	0.0170841	0.0390507	0.0154004	0.0396243	0.00766768	0.0201624	0.00998753	0.0101235	0.0187762	0.0183492
0.0164316	0.0509765	0.0506627	0.0443605	0.0305341	0.00958048	0.00762865	0.0264525	0.0058799	0.0125421	0.0183469	0.0164421	0.0196943	0.0136073	0.0102421	0.0736555	0.0747222	0.0134822	0.0120226	0.0072071	0.0108555	0.0192512	0.0304376	0.0140966	0.0270776	0.0120332	0.0258175	0.0108751	0.0316429	0.00229143	0.00902252	0.0281463	0.0428315	0.013499	0.00625647	0.010217	0.00159878	0.0206468	0.023259	0.0103757	0.0174268	0.0397582	0.0152742	0.0406913	0.0074578	0.0199858	0.00994436	0.0101982	0.0186559	0.0185119
0.0171199	0.0510268	0.0505342	0.0438613	0.0307012	0.00949947	0.00813543	0.0260867	0.00688932	0.0128216	0.0181367	0.0151489	0.0212163	0.0139243	0.00985357	0.0737798	0.0746701	0.0133954	0.0126508	0.00698253	0.01102	0.0197864	0.0309564	0.0138012	0.026957	0.0121694	0.0248249	0.0111223	0.031729	0.00241169	0.00886292	0.0277259	0.0431001	0.0134177	0.00562306	0.0106768	0.00122067	0.0201856	0.0233366	0.0102875	0.0177525	0.0404333	0.0151341	0.0417512	0.00724455	0.0197983	0.00992574	0.0102792	0.018495	0.0186704
0.0178135	0.0510349	0.0503837	0.0433537	0.0308359	0.00942733	0.00865393	0.0257042	0.00790412	0.0131122	0.017917	0.0138282	0.0227288	0.0142266	0.00951059	0.0739472	0.0746216	0.0133019	0.0132872	0.00677216	0.0111976	0.0203304	0.0314732	0.013505	0.0268082	0.0122896	0.0238307	0.011353	0.0317837	0.00254327	0.00869549	0.0272916	0.0433309	0.0133531	0.00501219	0.0111164	0.000836176	0.0197035	0.0233843	0.0101879	0.0180755	0.0410806	0.0149901	0.0427946	0.00702391	0.0195985	0.00992535	0.0103624	0.0183015	0.0188111
0.0185076	0.0510094	0.0502103	0.042833	0.0309472	0.0093637	0.00917152	0.0253007	0.00891975	0.0134188	0.017677	0.0124823	0.02423	0.0145119	0.00922505	0.074085	0.0745494	0.0131959	0.0139302	0.00657439	0.0113903	0.0208804	0.0319721	0.0131954	0.0266251	0.0123953	0.0228393	0.0115768	0.0317541	0.00266093	0.00852109	0.0268506	0.0434736	0.013312	0.00443866	0.0115395	0.000444556	0.0192028	0.0233927	0.0100772	0.0183881	0.0416951	0.0148357	0.0438303	0.00679798	0.0193898	0.00993786	0.0104625	0.0180859	0.0189462
0.0192041	0.0509752	0.0500172	0.0422965	0.0310397	0.00931288	0.00968879	0.0248775	0.00994408	0.0137238	0.0174242	0.0111255	0.0257186	0.0147755	0.00899659	0.0741938	0.074468	0.0130953	0.0145805	0.00639065	0.0116028	0.0214385	0.032459	0.0128903	0.0264058	0.0124816	0.0218487	0.0118002	0.0317045	0.00277752	0.00834266	0.026398	0.0435862	0.0132822	0.00391334	0.0119426	9.07185e-05	0.0187288	0.0233714	0.00996039	0.0186877	0.0422735	0.014672	0.0448547	0.00656899	0.0191673	0.00996963	0.010565	0.0178217	0.0190724
0.0199077	0.0509239	0.0498044	0.0417623	0.031108	0.00927259	0.0101803	0.0244423	0.0109701	0.0140233	0.0171577	0.00974798	0.0271972	0.0150302	0.00884416	0.0742968	0.0743774	0.0129975	0.0152455	0.00621904	0.0118084	0.0219977	0.0329291	0.0125813	0.0261766	0.0125613	0.020863	0.0120096	0.0316239	0.00288868	0.00815584	0.0259489	0.0436632	0.0132724	0.00346119	0.0123364	0.000382701	0.0182652	0.0233158	0.00983972	0.0189809	0.0428198	0.0145059	0.0458614	0.00632596	0.0189297	0.0100086	0.0106792	0.0175219	0.0191829
0.0206131	0.0508551	0.0495705	0.041208	0.0311442	0.00925447	0.0106733	0.0239888	0.0119951	0.0143122	0.0168733	0.0083616	0.0286586	0.0152694	0.00876387	0.0743847	0.074293	0.0129059	0.0159129	0.00606352	0.0120028	0.0225583	0.0333865	0.012273	0.0259539	0.0126271	0.0198803	0.0122065	0.0315156	0.00299785	0.00796724	0.0254904	0.0437046	0.013274	0.00310875	0.0127123	0.000794048	0.0178059	0.0232344	0.00971363	0.0192588	0.0433232	0.0143402	0.0468579	0.00608013	0.0186877	0.01006	0.0108057	0.0171843	0.0192833
0.0213259	0.0507661	0.0493157	0.040645	0.0311578	0.00925476	0.0111904	0.0235176	0.0130165	0.0146092	0.0165739	0.00697118	0.0300949	0.0154917	0.00876894	0.0744725	0.0742089	0.01281	0.0165809	0.00591663	0.0122597	0.0231492	0.0338245	0.0119705	0.0256591	0.0126644	0.0189024	0.0123996	0.0313849	0.00310097	0.00778444	0.0250352	0.0437114	0.0132757	0.00289736	0.0130688	0.0012076	0.0173533	0.023131	0.00958435	0.0195237	0.0437977	0.0141583	0.0478393	0.00583242	0.0184461	0.0101235	0.0109033	0.0168137	0.0193624
0.0220383	0.0506627	0.0490399	0.0400669	0.0311411	0.00927395	0.0116973	0.0230237	0.0140365	0.0149072	0.0162572	0.00560055	0.0315102	0.0156997	0.00885556	0.074552	0.074104	0.012712	0.0172509	0.00578636	0.0125486	0.0237416	0.0342494	0.011666	0.0253217	0.0126813	0.0179353	0.0125834	0.0312232	0.00319653	0.00759839	0.0245897	0.0436788	0.013284	0.002853	0.0134044	0.00163156	0.0169085	0.0229915	0.00947067	0.0197724	0.0442429	0.0139747	0.0487936	0.00557569	0.018196	0.0101982	0.0110036	0.0164015	0.0194273
0.0227513	0.0505342	0.0487397	0.0394855	0.0311112	0.00931348	0.0122196	0.0225165	0.0150547	0.0151994	0.0159258	0.00427327	0.0329093	0.0158868	0.00902438	0.0746318	0.0740064	0.0126103	0.0179178	0.0056682	0.0128491	0.0243191	0.0346609	0.011366	0.0249588	0.0126902	0.0169784	0.0127791	0.0310351	0.00329221	0.00740919	0.0241451	0.0436068	0.0133	0.00297	0.013718	0.00206317	0.0164701	0.0228231	0.00934944	0.0200007	0.0446618	0.0137797	0.0497349	0.00531835	0.0179609	0.0102792	0.0111166	0.0159559	0.0194782
0.0234615	0.0503837	0.0484257	0.0388953	0.0310571	0.00936639	0.0127209	0.0219933	0.016067	0.015488	0.0155825	0.00308903	0.0342912	0.0160565	0.00926479	0.0746837	0.0739136	0.0125056	0.0185787	0.00556391	0.013172	0.0248915	0.0350555	0.0110747	0.0245723	0.0126821	0.0160337	0.0129711	0.0308119	0.00338089	0.00721332	0.0236716	0.0434942	0.0133306	0.00322995	0.0140119	0.0024979	0.0160511	0.0226273	0.00922678	0.0202243	0.045038	0.0135815	0.0506505	0.00507307	0.0177023	0.0103624	0.011225	0.0154675	0.0195153
0.0241741	0.0502103	0.048095	0.0382965	0.0309648	0.00943962	0.0131751	0.0214567	0.0170718	0.0157656	0.0152314	0.00230018	0.0356569	0.0162076	0.00957589	0.0747184	0.0737884	0.0123931	0.0192272	0.00548841	0.0135025	0.0254612	0.0354394	0.0107872	0.0241712	0.0126532	0.0151016	0.0131061	0.0305614	0.00345843	0.00702229	0.0231844	0.0433506	0.0133726	0.00359861	0.0142871	0.00293377	0.0156544	0.0224026	0.00909802	0.0204344	0.0453527	0.0133855	0.0515419	0.00481432	0.0174268	0.0104625	0.0113329	0.0149433	0.0195333
0.0248836	0.0500172	0.0477395	0.037696	0.0308518	0.00952878	0.0135865	0.0209049	0.0180673	0.0160301	0.0148631	0.00237551	0.0369797	0.0163451	0.00994556	0.0747627	0.0736142	0.0122822	0.0198721	0.00543672	0.013854	0.0260363	0.035804	0.0105079	0.0237454	0.0126187	0.0141911	0.0132366	0.0302791	0.00353535	0.00683451	0.0227229	0.0431597	0.0134241	0.00403322	0.0145406	0.00336435	0.0152865	0.0221479	0.00896958	0.0206341	0.0456367	0.0131819	0.0524053	0.00453096	0.0171464	0.010565	0.0114503	0.0143902	0.0195431
0.0256162	0.0498044	0.0473678	0.0370842	0.0306953	0.00964343	0.0139817	0.0203438	0.0190498	0.0162804	0.0144832	0.00329084	0.0382896	0.0164621	0.0103555	0.0748107	0.0734172	0.0121671	0.0205176	0.00541703	0.0142188	0.0266076	0.036164	0.0102478	0.0233065	0.0125715	0.0133055	0.0133706	0.0299732	0.0036043	0.0066521	0.0222653	0.0429271	0.013469	0.00452017	0.0147726	0.003799	0.0149456	0.0218714	0.00886464	0.020818	0.045891	0.0129743	0.0532396	0.00425002	0.0168571	0.0106792	0.0115565	0.013793	0.0195276
0.0263655	0.0495705	0.0469817	0.0364721	0.0305105	0.00977331	0.0143423	0.019761	0.0200171	0.0165448	0.0140977	0.00455819	0.039566	0.0165574	0.0108186	0.0748445	0.0732069	0.0120525	0.0211527	0.00542551	0.0146006	0.0271643	0.0364924	0.0100012	0.0228425	0.0125024	0.0124299	0.0134982	0.0296336	0.00367422	0.00648321	0.021816	0.0426556	0.0135001	0.00503356	0.0149825	0.00422361	0.0146478	0.0215715	0.00877878	0.0209908	0.0461065	0.0127699	0.054044	0.00396578	0.0165658	0.0108057	0.0116545	0.0131703	0.0194987
0.0270723	0.0493157	0.0465912	0.0358599	0.0302927	0.00991778	0.0146816	0.0191664	0.020968	0.0167999	0.0136963	0.00594758	0.0407945	0.0166303	0.0113053	0.0748807	0.0729885	0.0119404	0.0217628	0.00546813	0.015001	0.0277286	0.0368022	0.00977163	0.0223648	0.0124272	0.0115634	0.0136149	0.0292695	0.00373606	0.00631415	0.0213733	0.0423538	0.0135452	0.00556389	0.0151753	0.00464766	0.0143951	0.0212503	0.00872215	0.0211564	0.0462903	0.0125634	0.0548235	0.00368607	0.0162688	0.0109033	0.0117489	0.0125155	0.0194536
0.0277729	0.0490399	0.0461807	0.0352459	0.0300617	0.010078	0.0149991	0.0185651	0.0219117	0.0170323	0.0132885	0.0074202	0.0420121	0.0166762	0.0118315	0.0749134	0.0727583	0.0118243	0.0223554	0.00554493	0.0154181	0.0282862	0.0371014	0.00956499	0.0218688	0.0123406	0.0107139	0.0137221	0.0288784	0.00378623	0.00615758	0.0209269	0.0420214	0.0135992	0.00610584	0.0153427	0.00506734	0.0141886	0.0208999	0.00869536	0.0213144	0.0464354	0.0123488	0.0555752	0.00341099	0.0159733	0.0110036	0.0118341	0.0118192	0.0193905
0.0284756	0.0487397	0.0457412	0.0346291	0.0298052	0.0102437	0.0152856	0.0179466	0.0228388	0.0172535	0.0128636	0.00892285	0.0432089	0.0167016	0.012388	0.0749273	0.072518	0.0117	0.0229266	0.00566175	0.0158456	0.028841	0.0373794	0.00937431	0.0213602	0.0122336	0.00990724	0.0138268	0.0284605	0.0038422	0.00602222	0.0204862	0.0416473	0.0136517	0.00664371	0.0154838	0.00548365	0.0140332	0.0205296	0.00869757	0.0214578	0.0465431	0.0121342	0.0563002	0.00313136	0.0156724	0.0111166	0.0119152	0.0110837	0.0193155
0.0291807	0.0484257	0.0453012	0.0340174	0.0295156	0.0104249	0.0155529	0.0173208	0.0237444	0.017464	0.0124316	0.0104518	0.0443721	0.0167108	0.0129631	0.0749331	0.0722622	0.0115672	0.0234968	0.00581416	0.0162955	0.0293814	0.0376474	0.00921424	0.0208343	0.0121163	0.00912261	0.0139156	0.0280085	0.00388593	0.0059005	0.0200546	0.0412383	0.0137105	0.00718272	0.0156025	0.00589502	0.0139258	0.0201369	0.00873365	0.0215735	0.0466065	0.0119149	0.056998	0.00284925	0.0153694	0.011225	0.0119847	0.0103166	0.0192262
0.0298819	0.048095	0.0448439	0.0334005	0.0292053	0.0106178	0.0157942	0.0166823	0.0246379	0.0176642	0.0120043	0.0119889	0.0455037	0.0166946	0.0135476	0.0749191	0.0719835	0.0114377	0.0240385	0.00599597	0.0167571	0.029909	0.0378845	0.0090758	0.0202943	0.0119767	0.00836561	0.0140001	0.0275307	0.00392674	0.00579956	0.0196283	0.0407894	0.0137747	0.00771794	0.0157083	0.00630085	0.0138696	0.0197323	0.00881295	0.0216781	0.046627	0.0116978	0.0576532	0.00256744	0.015061	0.0113329	0.0120427	0.00952049	0.0191231
0.0305685	0.0477395	0.0443605	0.03278	0.0288773	0.0108143	0.0160091	0.0160323	0.0254988	0.0178493	0.0115719	0.0135313	0.0466011	0.0166574	0.0141313	0.0748913	0.071688	0.0112996	0.0245451	0.00620001	0.0172277	0.0304376	0.0381132	0.00896364	0.0197466	0.0118263	0.00766662	0.0140801	0.027029	0.0039684	0.00571823	0.0192116	0.04031	0.0138477	0.00824461	0.0157981	0.0066981	0.0138657	0.0193137	0.00892508	0.0217578	0.0466121	0.0114787	0.0582717	0.00228462	0.0147579	0.0114503	0.0120937	0.00871785	0.0190024
0.031255	0.0473678	0.0438613	0.0321612	0.0285116	0.0110167	0.0161986	0.0153758	0.0263401	0.0180193	0.0111486	0.0150746	0.0476595	0.0166002	0.0147131	0.0748529	0.0713692	0.0111557	0.0250331	0.00645147	0.0177125	0.0309564	0.0383171	0.00887668	0.0191847	0.0116721	0.00700822	0.014152	0.0265001	0.00400155	0.00564989	0.0187988	0.0398026	0.0139058	0.00875064	0.015868	0.00708328	0.0139164	0.0188842	0.0090793	0.0218241	0.0465584	0.0112573	0.058855	0.00200217	0.0144514	0.0115565	0.0121356	0.00789988	0.0188654
0.0319307	0.0469817	0.0433537	0.031553	0.028109	0.0112239	0.0163653	0.0147077	0.0271545	0.0181706	0.0107221	0.0166173	0.0486845	0.0165265	0.0152923	0.0748109	0.0710244	0.0110086	0.0254974	0.00673149	0.0182123	0.0314732	0.0385075	0.00881995	0.018615	0.0115012	0.00640509	0.0142148	0.0259493	0.00402803	0.00560534	0.0183963	0.0392614	0.0139603	0.00925418	0.0159164	0.0074641	0.0140169	0.0184377	0.00927064	0.0218791	0.0464673	0.0110406	0.0593985	0.00172042	0.0141483	0.0116545	0.0121587	0.00702742	0.0187107
0.0326083	0.0465912	0.042833	0.0309471	0.0276727	0.0114304	0.0164891	0.0140331	0.027947	0.0183106	0.0103101	0.0181577	0.0496722	0.0164213	0.0158667	0.0747714	0.0706847	0.0108647	0.0259409	0.00703752	0.0187268	0.0319721	0.038673	0.00879308	0.0180373	0.0113185	0.0058709	0.0142649	0.0253777	0.00405833	0.00558829	0.0180026	0.0386943	0.0140151	0.00974272	0.0159414	0.0078254	0.0141648	0.0179799	0.00949664	0.0219162	0.0463372	0.0108161	0.0599028	0.00144265	0.0138496	0.0117489	0.0121802	0.00611886	0.0185397
0.0332851	0.0461807	0.0422965	0.0303546	0.0272159	0.0116381	0.0165785	0.013354	0.0287191	0.0184278	0.00991193	0.0196943	0.0506196	0.0162941	0.016422	0.0747222	0.0703397	0.0107225	0.0263576	0.0073795	0.0192512	0.032459	0.0388113	0.0087936	0.017453	0.0111286	0.00541004	0.0143098	0.0247758	0.00408726	0.00560124	0.0176156	0.0380915	0.0140705	0.010217	0.0159489	0.00817966	0.0143549	0.0175292	0.00976271	0.0219378	0.0461699	0.0105882	0.0603584	0.00118664	0.0135506	0.0118341	0.0121864	0.00519555	0.0183527
0.0339548	0.0457412	0.0417623	0.0297698	0.0267441	0.0118417	0.0166313	0.0126674	0.0294765	0.0185302	0.00952528	0.0212163	0.0515399	0.0161458	0.0169709	0.0746701	0.0699672	0.0105772	0.0267486	0.00773983	0.0197864	0.0329291	0.0389369	0.00882441	0.0168648	0.0109176	0.00503492	0.0143513	0.0241401	0.0041168	0.0056343	0.0172429	0.0374705	0.0141328	0.0106768	0.0159374	0.00851698	0.0145806	0.0170759	0.0100609	0.021949	0.0459641	0.0103654	0.0607634	0.000955365	0.0132649	0.0119152	0.0121792	0.00424477	0.0181587
0.0346156	0.0453012	0.041208	0.0292007	0.026246	0.0120506	0.0166472	0.0119751	0.030199	0.0186177	0.00916238	0.0227288	0.0524259	0.0159759	0.0174885	0.0746216	0.0695684	0.0104278	0.0271147	0.008126	0.0203304	0.0333865	0.0390369	0.00887478	0.0162638	0.0106909	0.00475977	0.0143901	0.0234613	0.00414951	0.00569311	0.0168835	0.0368103	0.0141857	0.0111164	0.0159136	0.00884223	0.0148572	0.0166215	0.0103993	0.0219307	0.0457183	0.0101398	0.0611517	0.000760626	0.0129848	0.0119847	0.0121633	0.00326785	0.0179478
0.0352627	0.0448439	0.040645	0.0286382	0.0257297	0.0122524	0.0166369	0.0112703	0.0308742	0.0186843	0.00882489	0.02423	0.0532683	0.0157866	0.0179855	0.0745494	0.0691424	0.0102816	0.0274537	0.00853861	0.0208804	0.0338245	0.0391224	0.00895222	0.015666	0.0104588	0.00459944	0.0144212	0.0227482	0.0041778	0.00577338	0.0165433	0.0361083	0.0142324	0.0115395	0.0158733	0.00916174	0.0151663	0.0161728	0.0107641	0.0218903	0.0454429	0.00991636	0.0614993	0.000631032	0.012705	0.0120427	0.0121337	0.0022718	0.0177165
0.0359022	0.0443605	0.0400669	0.0280767	0.0251876	0.0124462	0.0166231	0.0105698	0.031524	0.0187321	0.00851546	0.0257186	0.0540696	0.0155743	0.0184668	0.074468	0.0687015	0.010131	0.0277581	0.00897957	0.0214385	0.0342494	0.0391875	0.00905279	0.0150562	0.0102056	0.00455255	0.0144375	0.0220409	0.00421393	0.0058714	0.0162153	0.0353878	0.0142715	0.0119426	0.0158217	0.00946545	0.0154912	0.0157396	0.0111476	0.0218441	0.0451417	0.0096959	0.0617947	0.000609603	0.0124398	0.0120937	0.0120903	0.00128602	0.0174718
0.0365401	0.0438613	0.0394855	0.0275319	0.0246339	0.0126367	0.0165664	0.00986415	0.0321405	0.018762	0.0082465	0.0271972	0.0548382	0.0153439	0.0189334	0.0743774	0.0682423	0.00997656	0.0280308	0.00942981	0.0219977	0.0346609	0.0392345	0.00917534	0.0144566	0.00994523	0.00462483	0.0144511	0.0213109	0.00425513	0.00599377	0.0158972	0.0346591	0.014316	0.0123364	0.0157585	0.00975224	0.0158582	0.0153189	0.0115535	0.021788	0.0448004	0.00947	0.0620457	0.000720214	0.0121824	0.0121356	0.012036	0.000528168	0.0172147
0.0371726	0.0433537	0.0388953	0.027011	0.0240592	0.0128161	0.0164683	0.00915633	0.0327284	0.018781	0.00801794	0.0286586	0.0555718	0.0150855	0.0193761	0.074293	0.0677643	0.00981836	0.0282639	0.00990665	0.0225583	0.0350555	0.0392492	0.00931557	0.0138736	0.00967739	0.0047955	0.0144534	0.0205556	0.00430017	0.00612491	0.0155903	0.0339107	0.0143459	0.0127123	0.0156876	0.010026	0.0162431	0.0149173	0.0119892	0.0217195	0.0444101	0.00924038	0.0622543	0.000949756	0.0119329	0.0121587	0.0119685	0.00108372	0.0169408
0.0377905	0.042833	0.0382965	0.0265116	0.0234668	0.0129834	0.0163578	0.00844766	0.033278	0.0187768	0.00784534	0.0300949	0.0562775	0.0148123	0.0197878	0.0742089	0.0672704	0.00965703	0.0284619	0.0103894	0.0231492	0.0354394	0.0392474	0.00947954	0.0132634	0.0093978	0.0050488	0.0144616	0.0197933	0.00434598	0.00626715	0.0152958	0.0331295	0.0143684	0.0130688	0.015609	0.0102821	0.016652	0.0145277	0.0124385	0.0216293	0.0439938	0.00901722	0.0624144	0.00122305	0.0117002	0.0121802	0.01189	0.0021163	0.0166605
0.0383778	0.0422965	0.037696	0.0260244	0.0228501	0.0131363	0.0162071	0.00774317	0.033796	0.0187464	0.00772406	0.0315102	0.0569408	0.0145155	0.0201706	0.074104	0.0667554	0.00950103	0.028624	0.0108887	0.0237416	0.035804	0.0392239	0.00965759	0.0126569	0.00910376	0.00538877	0.0144588	0.0190298	0.0044044	0.00642645	0.0150182	0.0323403	0.0143925	0.0134044	0.0155237	0.0105206	0.017065	0.014171	0.012896	0.0215266	0.0435434	0.00879485	0.0625324	0.00150433	0.0114794	0.0121864	0.0117982	0.00321358	0.0163717
0.0389509	0.0417623	0.0370842	0.0255564	0.0222364	0.0132755	0.0160298	0.0070469	0.0342756	0.018707	0.00766982	0.0329093	0.0575418	0.0142027	0.0205276	0.0740064	0.0662235	0.0093447	0.0287555	0.0114063	0.0243191	0.036164	0.0391753	0.00986428	0.0120615	0.00880172	0.00577166	0.0144597	0.0182389	0.00447695	0.00659443	0.0147537	0.0315217	0.0144125	0.013718	0.0154384	0.0107445	0.0174799	0.0138361	0.013368	0.021417	0.0430641	0.00857354	0.0626135	0.00180185	0.0112933	0.0121792	0.0116947	0.00433765	0.016066
0.0395219	0.041208	0.0364721	0.0251129	0.0216032	0.0134023	0.0158251	0.00635684	0.0347198	0.0186446	0.00767782	0.0342912	0.0580945	0.0138704	0.0208751	0.0739136	0.0656735	0.00918933	0.028854	0.0119272	0.0248915	0.0364924	0.0391184	0.0100844	0.0114768	0.0084919	0.00616464	0.0144471	0.0174176	0.00455311	0.00675927	0.0145038	0.0306782	0.0144284	0.0140119	0.0153498	0.0109519	0.0179034	0.0135283	0.0138399	0.0212894	0.042569	0.0083498	0.0626341	0.00210874	0.0111018	0.0121633	0.0115809	0.00548587	0.0157565
0.0400877	0.040645	0.0358599	0.0246914	0.0209164	0.0135115	0.0155933	0.00567955	0.0351261	0.0185665	0.00774972	0.0356569	0.0586127	0.0135212	0.0211856	0.0737884	0.0651106	0.00903028	0.0289075	0.0124594	0.0254612	0.0368022	0.0390465	0.0102908	0.0109066	0.00816322	0.00657682	0.0144108	0.0165799	0.00463637	0.006938	0.0142638	0.0298198	0.0144362	0.0142871	0.0152608	0.0111413	0.018324	0.0132672	0.014315	0.0211522	0.0420405	0.00813343	0.0626075	0.00242382	0.0108881	0.0121337	0.0114499	0.00665131	0.0154467
0.040647	0.0400669	0.0352459	0.0242845	0.0202242	0.0136021	0.0153514	0.00501996	0.0354894	0.0184632	0.00788391	0.0369797	0.0590984	0.0131551	0.0214502	0.0736142	0.0645294	0.00887321	0.0289314	0.013003	0.0260363	0.0371014	0.038929	0.0105094	0.0103452	0.00782109	0.00700614	0.0143871	0.0157308	0.00472299	0.00712737	0.0140385	0.0289406	0.0144358	0.0145406	0.0151712	0.0113171	0.0187389	0.0130489	0.0147887	0.0210054	0.0414835	0.00792272	0.0625311	0.00274145	0.0107072	0.0120903	0.0113153	0.00782407	0.0151137
0.0412014	0.0394855	0.0346291	0.0239093	0.0195244	0.0136839	0.0150896	0.00437458	0.0358171	0.018337	0.00808207	0.0382896	0.0595462	0.0127755	0.0216729	0.0734172	0.06393	0.00871698	0.0289194	0.0135486	0.0266076	0.0373794	0.0387674	0.0107337	0.00979231	0.00747185	0.00744849	0.0143519	0.0148639	0.00483219	0.00731953	0.0138203	0.0280488	0.0144264	0.0147726	0.0150881	0.0114783	0.0191526	0.0128775	0.0152531	0.0208615	0.0409044	0.0077064	0.0624117	0.00306408	0.0105469	0.012036	0.0111674	0.00901534	0.0147739
0.0417453	0.0388953	0.0340174	0.023562	0.0187996	0.0137407	0.0148206	0.00376695	0.0361019	0.0182462	0.00833129	0.039566	0.0599531	0.0123867	0.0218658	0.0732069	0.0633169	0.00855895	0.0288674	0.0140991	0.0271643	0.0376474	0.0385875	0.0109605	0.00925292	0.00711521	0.00790288	0.0143419	0.0139873	0.00495049	0.00751251	0.0136104	0.0271519	0.0144127	0.0149825	0.0150086	0.01161	0.0195536	0.012755	0.015717	0.0206864	0.0402972	0.00749515	0.0622322	0.00340724	0.0104103	0.0119685	0.0110062	0.0102112	0.0144331
0.0422507	0.0382965	0.0334005	0.0232416	0.0180602	0.0137796	0.0145446	0.00321596	0.0363432	0.0181043	0.00862999	0.0407945	0.0603141	0.0119813	0.0220219	0.0729885	0.062685	0.00839538	0.0287838	0.0146681	0.0277286	0.0378845	0.0384036	0.0111881	0.00872308	0.00674579	0.00835113	0.0143274	0.0131118	0.00507458	0.00770235	0.0134208	0.0262368	0.0143905	0.0151753	0.0149324	0.0117284	0.0199486	0.0126816	0.0161737	0.0204564	0.039668	0.00729015	0.0620064	0.00376508	0.0102916	0.01189	0.0108318	0.0114193	0.0140869
0.0427485	0.037696	0.03278	0.0229507	0.0173232	0.0137991	0.0142662	0.00276745	0.0365452	0.0179251	0.00897851	0.0420121	0.0606378	0.0115646	0.022138	0.0727583	0.0620452	0.00822552	0.0286581	0.0152351	0.0282862	0.0381132	0.0382074	0.011415	0.0082124	0.0063706	0.00879398	0.0143009	0.0122165	0.00521584	0.00789875	0.0132404	0.0253175	0.0143641	0.0153427	0.0148665	0.0118301	0.0203357	0.0126619	0.0166137	0.0202298	0.0390299	0.0070836	0.0617501	0.00411738	0.0101849	0.0117982	0.0106518	0.0126412	0.0137358
0.0432443	0.0370842	0.0321612	0.0226858	0.0165923	0.0138074	0.0139877	0.00246618	0.0367073	0.0177347	0.00936921	0.0432089	0.0609173	0.0111368	0.0222245	0.072518	0.061394	0.00805538	0.0284834	0.0157986	0.028841	0.0383171	0.0379846	0.0116353	0.00771411	0.00598296	0.00922263	0.0142728	0.0113082	0.0053759	0.00808402	0.0130636	0.0243842	0.0143314	0.0154838	0.0148076	0.0119133	0.0207012	0.0126964	0.0170389	0.0199959	0.0383653	0.00688081	0.0614506	0.00447368	0.0100973	0.0116947	0.0104606	0.0138667	0.0133739
0.0437249	0.0364721	0.031553	0.0224452	0.0158548	0.013797	0.0137116	0.00235276	0.0368263	0.0175203	0.00979661	0.0443721	0.0611612	0.0107066	0.022271	0.0722622	0.0607365	0.00788132	0.0282715	0.0163605	0.0293814	0.0385075	0.0377336	0.0118541	0.007232	0.0055875	0.00965491	0.0142411	0.0103883	0.00555137	0.00826063	0.0128951	0.0234475	0.0143012	0.0156025	0.0147664	0.011981	0.0210527	0.0127727	0.0174618	0.0197632	0.0376923	0.00668772	0.0611012	0.00482729	0.0100311	0.0115809	0.0102605	0.0150903	0.0130163
0.0441973	0.0358599	0.0309471	0.0222411	0.0151177	0.0137588	0.013449	0.00245705	0.0368987	0.0172964	0.0102551	0.0455037	0.0613658	0.0102642	0.0222806	0.0719835	0.0600627	0.00770847	0.0280241	0.0169222	0.029909	0.038673	0.0374643	0.0120708	0.0067801	0.00518327	0.0100841	0.0142	0.0094643	0.0057195	0.0084399	0.0127351	0.0225176	0.0142694	0.0157083	0.0147346	0.0120319	0.0213846	0.0128886	0.0178673	0.0195205	0.0370131	0.00649702	0.060714	0.00518888	0.00998753	0.0114499	0.0100536	0.0163222	0.0126558
0.0446567	0.0352459	0.0303546	0.0220662	0.0143867	0.0136987	0.0132089	0.00275506	0.0369256	0.0170445	0.0107391	0.0466011	0.0615311	0.00981498	0.0222505	0.071688	0.0593799	0.00752831	0.0277429	0.0174757	0.0304376	0.0388113	0.0371697	0.012279	0.00635348	0.0047736	0.0104875	0.0141629	0.0085381	0.0058955	0.00861693	0.0125782	0.0215798	0.014229	0.0157981	0.0147031	0.0120626	0.0216969	0.013069	0.0182394	0.0192637	0.0363133	0.00631472	0.0602828	0.00555468	0.00994436	0.0113153	0.00983221	0.0175438	0.0122953
0.0451065	0.0346291	0.0297698	0.0219104	0.0136759	0.0136137	0.0129971	0.00319024	0.0369164	0.016779	0.0112303	0.0476595	0.0616529	0.00936765	0.022181	0.0713692	0.0586966	0.00733775	0.027424	0.0180278	0.0309564	0.0389369	0.0368539	0.0124748	0.00595944	0.00436491	0.0108725	0.0141258	0.00761794	0.00607618	0.00878413	0.0124341	0.0206442	0.0141837	0.015868	0.0146878	0.0120729	0.021985	0.0132935	0.0186014	0.018995	0.0355993	0.00613413	0.0598089	0.0059357	0.00992574	0.0111674	0.0096075	0.0187542	0.011939
0.0455484	0.0340174	0.0292007	0.021781	0.0129907	0.0135104	0.0128183	0.00371217	0.0368621	0.0164952	0.0117443	0.0486845	0.0617305	0.00890435	0.0220799	0.0710244	0.0580082	0.00714521	0.0270679	0.0185736	0.0314732	0.0390369	0.0365089	0.012664	0.00559907	0.00395346	0.0112318	0.0140767	0.00670712	0.00626923	0.00893467	0.0122858	0.0197038	0.0141411	0.0159164	0.0146811	0.0120656	0.0222462	0.013548	0.0189421	0.0187106	0.0348733	0.00596914	0.0592924	0.00633056	0.00992535	0.0110062	0.00938083	0.0200284	0.0115894
0.0459685	0.0334005	0.0286382	0.0216789	0.0123346	0.0133926	0.0126845	0.00428478	0.0367672	0.0162052	0.0122683	0.0496722	0.0617723	0.00845216	0.0219479	0.0706847	0.0573121	0.00694291	0.026663	0.0191208	0.0319721	0.0391224	0.0361463	0.0128507	0.00527899	0.0035516	0.0115795	0.0140382	0.0058046	0.00646482	0.00908948	0.0121394	0.0187742	0.0140955	0.0159414	0.0146783	0.0120404	0.0224802	0.01383	0.0192569	0.0184173	0.0341391	0.00581173	0.058721	0.00671773	0.00993786	0.0108318	0.00915056	0.0212631	0.0112495
[truncated: 23 more rows]
[truncated: 14 more columns]

## Sheet: Figure3B_ripple_power_right
0.0156768	0.0197851	0.00903576	0.034934	0.0342177	0.0123225	0.0300449	0.0572076	0.082823	0.0176187	0.0490805	0.012914
[truncated: 799 more rows]

[truncated: 4 more sheets: Figure3B_mean_ripple_power_left, Figure3B_mean_ripple_power_righ, Figure3B_mean_spiking_left, Figure3B_mean_spiking_right]
